# Supplementary material for: Transcriptomic analysis of human ALS skeletal muscle reveals a disease-specific pattern of dysregulated circRNAs
Source: Aging (Albany NY). 2022 Dec 30;14(24):9832–59. doi: 10.18632/aging.204450 (PMC9831722; doi:10.18632/aging.204450)
Supplement: Supplementary File 1 [file aging-14-204450-s001.xlsx]

## Sheet: Primer pairs
Supplementary File 1. qPCR primers used in this study.
	List of primers used in this study
oligo name
RPS9_F	GTTTGCTTAGGCGCAGACG
RPS9_R	AGTTTTGCGACAAACCCAGC
TBP_F	TGGCGTGTGAAGATAACCCAA
TBP_R	TGGCAAACCAGAAACCCTTG
hsa_circ_0007778_F	TGGAGCAATAGCGCAGACAA
hsa_circ_0007778_R	TCTTTTTGAGGAACAGCACGC
SLC25A16_F	ATCATTGTCTTTCAGTACCATGCG
SLC25A16_R	AGCCACTGCTTGAGAGGGAA
hsa_circ_0000119_F	CTGAGAAACTCCTTCCTGCCT
hsa_circ_0000119_R	AGACGTTCTTCCTCTTCCCTTT
MAN1A2_F	TAAAACCAAGGGAATGGGGC
MAN1A2_R	ACAAAATGTGCAACCCACAAGA
hsa_circ_0120912_F	ATCTTTCTGAAACCAGCCTCTG
hsa_circ_0120912_R	TGATTTGGCTCAGGTGATGGG
DYSF_F	CAGGTGCAAAATGCCGTGTC
DYSF_R	GGGCTTCTGCTCATCTTCCA
hsa_circ_0000417_F	CGTCATCGTTAGAAGGAAGCTG
hsa_circ_0000417_R	TCGGTCTTCTGGGGCATCT
CPSF6_F	AGCTGAATATGGTGGGCATGA
CPSF6_R	GTGCTGCTCCTTTACCCACA
hsa_circ_0005552_F	AGTAGGAGAATTGGCAGCACT
hsa_circ_0005552_R	CTTCATCTTGCTGCTGTGTCC
EHBP1_F	GTGGCGGAGGAGAAAGGC
EHBP1_R	GGGATCTGCAGCCCCTCA
hsa_circ_0000567_F	ACTTCTATAAAGTCATCCAGTCAGA
hsa_circ_0000567_R	CACTGGTCAGGTTCAAGATTTCC
SETD3_F	GGAAGCGGGCAGTCAGAAAA
SETD3_R	CAGCTCACTGGTCAGGTTCA
hsa_circ_0001451_F	TCACCAACTCTCCTCCCCATT
hsa_circ_0001451_R	CCAGTTCGTCGTCTTTTGCTG
FBXW7_F	GCATCAGAGTGCTGTGACCT
FBXW7_R	CCCCCACTCTCCAATGTGAC
hsa_circ_0002566_F	AGATGGTAGCCAAACCCCCA
hsa_circ_0002566_R	AATTCCGTTGTGCAGTGTCC
ZNF680_F	TGGCCAGAGCATAGCATAAAAGA
ZNF680_R	TGAACACCTTAGACTCATCCAC
hsa_circ_0005615_F	ACCCCTATATTTCGATCTTGAGCC
hsa_circ_0005615_R	TGGTAAGCAAAGTGGTGTGGT
NFATC3_F	AGTGTGCTCTCATGTCCAGC
NFATC3_R	ATCCAGGGACTCAGGACTCG
hsa_circ_0002972_F	GAGCTCTCAGCCACTCCCTA
hsa_circ_0002972_R	TTCTTCCCAGCCTTTGCGTT
FAM193B_F	TGTGAGTTCTTCGGCCACAA
FAM193B_R	CACTTCTCTGGGATTACACACG
hsa_circ_0008812_F	AACGAGTGCACTTGGTGAAAG
hsa_circ_0008812_R	TCATTGAGGATTTTGCCTGCAT
RAD23B_F	GCCTTCTGCAGACTCCGTG
RAD23B_R	GGCTTGTCACATTCGCCCAG
hsa_circ_0001016_R	TCCAAGGAACCAGTGCGAAG
hsa_circ_0001016_F	AATTCCAAAATTGTGTCGACTCTTG
XPO1_F	GCTGAAAACTCAACCGAGATGGA
XPO1_R	TGTTGCTCTTGCTGATGCTGTA
hsa_circ_0004113_F	TCTGCTTCTACAAGAACATTTCAG
hsa_circ_0004113_R	TGCAGCAGCTCTCTTAAAACT
SLC25A26_F	GGCTGAGATGATGGCAGTTAGA
SLC25A26_R	TGAGCCCGTGTTAATGGCTG
hsa_circ_0000231_F	TTGTGATTCCGCAGGAGAAGG
hsa_circ_0000231_R	AGCTTAGAACAAGGAGATCTACACC
ARHGAP12_F	GCACCAAGATACAGCCAGCA
ARHGAP12_R	ACACCGCCCAAGAAGACAAC
hsa_circ_0073517_F	AAATGACAGCTGGGCTCAAAA
hsa_circ_0073517_R	ACAGCCCTTAGCTATGACGA
FBXL17_F	CTGTGGATGTCGGATGGTGT
FBXL17_R	TGTTCCACCGTCACTTCGTT
hsa_circ_0001423_F	CGGAGGACTATCGACAGCAG
hsa_circ_0001423_R	TGTACAAACTCAACTGACTGAGA
AFF1_F	TGGACAACTGGCTGACCAAA
AFF1_R	CTGCTGCCCTTACTCTCTGG
hsa_circ_0005465_F	ACCTTACAAAAACTGCCAGTGAA
hsa_circ_0005465_R	GGATTAAATCAATACTCTGTCTCCG
CLIP1_F	AGAGCCCAGGAGAGTCAGAT
CLIP1_R	TTAGGTCATCCCCGTTCCCA
hsa_circ_0005171_F	GGAAACCAGAAGGTGATGAATGG
hsa_circ_0005171_R	GGAGCATAGCAGTAAACCAGC
TMEM38B_F	GCCTGAAACCCATCCTGAATCTA
TMEM38B_R	TTTCTCAGTGCCACCTCTGATT
hsa_circ_0001369_F	TAGGCCACGCAGCCACATAA
hsa_circ_0001369_R	TCTGTTTAGTCTGCGTCCCAA
KLHL24_F	TGTGGTATGTCTGTGTGTAATGGT
KLHL24_R	CATTGCAGCTACCCCTGTGA
hsa_circ_0000099_F	ACGAGTAATGTCAAGCTACCGT
hsa_circ_0000099_R	TTGAGTGATGTGCCAGGAAA
AMY2B_F	ATCAACCTAGCCATCCAACCT
AMY2B_R	AACCGAATTTTCAATTGTTTTCACA
hsa_circ_0004805_F	AAGAAAAGTTGCCCGCTGTG
hsa_circ_0004805_R	TTTGTTGAGTTCCTGAAATAAGTGA
UBE2G1_F	CAGCAAGCAGCAAATGACCT
UBE2G1_R	CCTGGCTCTCACTTCCACTC
hsa_circ_0004912_F	TGGCTATGCCTTCGAGAACC
hsa_circ_0004912_R	CAGGCTCTTCCAGAAGACAGAA
PHF7_F	CAAAGCCACCCCTCAGATGT
PHF7_R	TCAGTTCTTTGCATCGCTGG
hsa_circ_0004870_F	AGACTTGCAGAGGAGAACCTA
hsa_circ_0004870_R	TCCCTTGGTCGAATTCTTGCC
RBM39_F	GCTCTTTGGCATTTGGTGCT
RBM39_R	AAGTGGCTGAACAGAGGCAG
hsa_circ_0005806_F	AGCACGAACCCTGAGCTG
hsa_circ_0005806_R	GTGAAGAGCCTCAAAGGTGG
FBRS_F	CGTCACTCTCTGGAAGCTGG
FBRS_R	AGGCTTTGCTGGTTGAGACA
hsa_circ_0007099_F	CCCACCTGACCTCTACTTCCA
hsa_circ_0007099_R	ACTCCATCAAACACGGCTGG
ABHD2_F	AACGTCATGTTTGTGCTGCC
ABHD2_R	TGCAACTTGTTACGCTCCCA
hsa_circ_0000033_F	AACAGGAAGAAAGGCTTCAGAATG
hsa_circ_0000033_R	CAAGATGCTGATCCACTGTGC
CEP85_F	CAGTCTTCCCGAGTGAGGGA
CEP85_F	CTCGGTGAAGTGACGTGAGA
hsa_circ_0056856_F	TGCATTGAGTGCCACCTGTC
hsa_circ_0056856_R	CAGTCGCCGTTACCTTCTTCT
ITGB6_F	GCGTTGGTCTTGTAACGCTG
ITGB6_R	ACAGCCACCTTGTACGTGAT
hsa_circ_0003239_F	AAGAAAAGTTGCCCGCTGTG
hsa_circ_0003239_R	ACACCACCTTCACCTGAAATAA
UBE2G1_F	GGAAGGCTTTTCTGCAGGTT
UBE2G1_R	AAAGTGTATCTGGAGGGCCA
hsa_circ_0003274_F	CATGAGCTAAAGCCGTTGGA
hsa_circ_0003274_R	GTCCTGGACTCTCCACTCT
SMAD5_F	TGGTTGGCGTAAGTTGTATTTTGA
SMAD5_R	GCAGCCACTAGCTTGGTCTT
hsa_circ_0116009_F	GAGGTTCAAGCAACGGCAAA
hsa_circ_0116009_R	ATCATGGACTCTCCTCCTTCCA
BRWD1_F	TGGTCAACACATAATGGCCG
BRWD1_R	ATTTTATCACAGCTCCCCGCA
hsa_circ_0006117_F	CTTTCCCTCCTTCAGATAAGCA
hsa_circ_0006117_R	AGGTGCAACTGTGGTAGCATT
PTPRA_F	AAGAACGAGCTGAACCGAGG
PTPRA_R	GGTCCTTCAGCGTCTCTAGC
hsa_circ_0047886_F	CCTACACAGTATCAGTAAATTGGTC
hsa_circ_0047886_R	TGAAGACAGTTCCTTTGGAAGC
ZCCHC2_F	ACACAGACAGCAATTCTGAGGA
ZCCHC2_R	TCCATTCTCATTTCCTAGTGAAGCA
hsa_circ_0001148_F	AGGGAAGTGCTGGACCTATGA
hsa_circ_0001148_R	TCAATAGGTTCTTCTTCCAAAAGGC
RBM39_F	TGGGAACAACTGGTCGTCTT
RBM39_R	GTTTGCAAATCTGCCACAGC
hsa_circ_0131936_F	TTCTCACACCCTCCTCAGTC
hsa_circ_0131936_R	AGATGGTGAGGAGAGATTTGCAT
MLIP_F	ACTCAGTTGGCTGACACCTC
MLIP_R	TCTTGTTGGCTCCCAGCATT
hsa_circ_0008362_F	GCCCATTACTCAGGATGACCA
hsa_circ_0008362_R	GACTGCATCTCCACTTCAGCA
FBXW4_F	GACGGCGAAGGAGGCAG
FBXW4_R	CCTCGACTCCCTTGACGATG
hsa_circ_0125943_F	AGAACCACAGATTACACCAGGAA
hsa_circ_0125943_R	TGAGTCATGGACTCTGTCCCA
PDLIM3_F	GCCCAAACCTTTCGTGATCC
PDLIM3_R	CCAGCTTAGCCGCAACTTTC
hsa_circ_0067323_F	ACCTACCAGCTCTGCTATGATG
hsa_circ_0067323_R	TTTTAGGAAAAGCCGCTCCGC
TMCC1_F	ACGGTTGGAAGTAAGCAGCC
TMCC1_R	TCTGCTGCAGGTGAGCAAT
hsa_circ_0067871_F	CCTGATCCAGCAGAACAGCAA
hsa_circ_0067871_R	TGTTCATATACAACTCCTGCACCT
GOLIM4_F	TGGGTGACACGTAAGTTGGG
GOLIM4_R	AGCTGTCTCGGCTGGTTTTG
hsa_circ_0000109_F	GATTCAGTGCATTTGCCCAGT
hsa_circ_0000109_R	GCTATTACCCAGGTCACCGT
CAPZA1_F	TTCATCACTCATGCACCCCC
CAPZA1_R	TCACAGGCGTGAACTGATCC
hsa_circ_0141401_F	GATCCTCCTCAGCTGTACCA
hsa_circ_0141401_R	ATGTTTCCAACCCCTGTCCC
ALPK2_F	CCGAAGGACCAGGGACTCTA
ALPK2_R	GGCGACTTGACAGCTGTTTG
hsa_circ_0118236_F	ACTCTGATTCTGACAGCAGTGAT
hsa_circ_0118236_R	GCTGCAGAGTTCTGAGGCA
CWC22_F	AACAAGACAGTGTGCCTGGA
CWC22_R	GCACCGACGGTAGGAAGAAG
hsa_circ_0117010_F	TATCCAGAAGAGCACACGGCA
hsa_circ_0117010_R	TAGTGCCTTCTGTAGCATCCC
NPHP1_F	GTGCTCCCACTTCTCCACTC
NPHP1_R	CGCCCTGGTTTTCTTGGTTT
hsa_circ_0007646_F	ATGACTTCTCTCCAATTTTCAGC
hsa_circ_0007646_R	TGGCCAATGTCTTCTGTTAGGT
DCUN1D4_F	TGGACGAGTTTGTGGAGTGG
DCUN1D4_R	TGGCTAATGGGTGACAAAACTG
hsa_circ_0002590_F	CAATGACTCTCCGCACGGTA
hsa_circ_0002590_R	TTGCTCGTCTGATTTGCTACT
UBE2K_F	GTGTTCGTGTGCTCAGGTCT
UBE2K_R	CGATGTTGGCCATGTCTCCG
hsa_circ_0000247_F	AGGGAGAGTGTTTTCCTGCTC
hsa_circ_0000247_R	TGGAGAGTGAGGTAGAAACGG
MCU_F	GCTTCCTTCAAGCCCACTCT
MCU_R	TCCTTTCCATCCTGCCCCTA
hsa_circ_0001953_F	AGCGGGATCTCAGTGGACC
hsa_circ_0001953_R	AAATGAGTTTGGCTCTTGTGGCT
ZFY_F	TTTGTCCGGAAGGCAGTTGA
ZFY_R	TTAGTCACAGCTCCTCACGC
hsa_circ_0001948_F	CTGACAAGGGTAAAGAGCCA
hsa_circ_0001948_R	AGTCCAATCCACTACCTTCAGTG
CD99L2_F	AACTTCCTCAGTAAAGCAGCCA
CD99L2_R	CAATCCACTACCTTCAGTGGG
hsa_circ_0009027_F	CGCTTCTTTGCAGATCCACC
hsa_circ_0009027_R	GCCTGTGTGGATTCGAGGT
ZNF362_F	ACTCCAAGTCGCACACAGAG
ZNF362_R	TAGGAGCAGTGGTAGGGCTT
hsa_circ_0006633_F	ATTTGCTGGGATAAGGCGGG
hsa_circ_0006633_R	TCCAAAACAACCAGAGAACACG
FGGY_F	GTGTCCTCTTCTGGGTGGAG
FGGY_R	GCTGGTCTGCAAAAGCCAAC
hsa_circ_0000944_F	CACGAGCGGCAGGAGTG
hsa_circ_0000944_R	GCACTGGGTTGGGTTCAAGA
CCDC9_F	CCGCAGAAGGAGAAAGAGCA
CCDC9_R	TTTGTCTCCCAGCGGTCATC
m_Rps9_F	ACATTAGGGTCCGCAAGCAG
m_Rps9_R	CCGCCATAAGGAGAACGGAG
m_Tbp_F	TTTGGCTAGGTTTCTGCGGT
m_Tbp_R	ACGTCTTCAATGTTCTGGGT
m_circ_0007778_F	TACCCATTTGATGTGACCCGA
m_circ_0007778_R	TTTTGGCACAGCATCCAGCAA
m_Slc25a16_F	TCTTAGGATGGTGCTGGGGA
m_Slc25a16_R	GAGGGGAAATAACGAGCGGG
m_circ_0000119_F	GGTGAACCTGAAAAGGGAAGAAG
m_circ_0000119_R	CTACACGTTGTGGGACAGGG
m_Man1a2_F	AATCGGAGAGCGTGAAAGAGG
m_Man1a2_R	AAACGTACAACACATCGAACCG
m_circ_0000567_F	TCAGTCAACACAAGCCATCCA
m_circ_0000567_R	CTGTAGCCCCAGTACCTGATTT
m_Setb3_F	GTGGGCCGTCTCATCAGTTA
m_Setb3_r	CAGCGGTCATCTTCCAGGTT
m_circ_0001451_F	GCGGCGGAGGATTACATCTG
m_circ_0001451_R	ACTTTGCATGGTTTCTTTCCCAA
m_Fbxw7_F	ATCGACTGACCGGACTCTCA
m_Fbxw7_R	CGAGAACCGCTTACAACCCT
m_circ_0000231_F	CTGGAGAAGGCTCCGAAAGA
m_circ_0000231_R	TGCCACATTATGCCTTGTGC
m_Arhgap12_F	TCCAGGTCAGGAGAAATATGGAC
m_Arhgap12_R	TGCCCAAGAAGACAACCAGT
m_circ_0005171_F	GTGATGAATGGCTGAAGAT
m_circ_0005171_R	TCCTCCACCAAAGCAATGGA
m_Tmem28b_F	ACCCGTGGGATGATCTGACT
m_Tmem28b_R	CAGCTAGCCAGGGGGTTATT
m_circ_0000099_F	AGTCAATGGTCAGCCTTTTGC
m_circ_0000099_R	TGGGTGGAGAGACCAGTCAT
m_Amy2b_F	TATCGCTCACATTCCTTGGCA
m_Amy2b_R	GTTCGTTCTGCTGCTTTCCC
m_circ_0007099_F	CTGCCCCTCCTGACCTCTAC
m_circ_0007099_R	CGGAGAATACGGGCTTTCCTT
m_Abhd2_F	ACCTCCCCACGAATGTTCAC
m_Abhd2_R	AGCTGGGTCTGGGGATATGT
m_circ_0056856_R	GTGAACGCTGTCCTACCTGT
m_circ_0056856_F	CACGAGTCCCTGTTGGTTGT
m_Itgb6_R	TCAGGGATGGTGACAACAGAA
m_Itgb6_F	CAAGCGTGAGAAACCTCGCA
m_circ_0047886_F	CCAGGCTTTCCTTCAGAGTCA
m_circ_004786_R	ATTCCTGTAGTTCTTGGTGGGTT
m_Zcchc2_F	GTAGCAAAATGCAGCCAGAGA
m_Zcchc2_R	ACCTCTGCCGTTCACTCCTT
m_circ_0141401_F	CACCAGCAGACCCACTTTCC
m_circ_0141401_R	AACAGCAGATCATCCCCACG
m_Alpk2_F	TGTTGACAAGAGTTCCCCCG
m_Alpk2_R	AGCAACAATAGCGTCGGTGA
m_circ_0001948_F	AAAGGCGGTGGTGGTTATGG
m_circ_0001948_R	TACTGGCCTCCTAGTCGTGG
m_Cd99l2_F	ATTCAGCAGGGCCTCAATGC
m_Cd99l2_R	GTACCTGCCTCAAATCCGGG
m_circ_0117010_F	CAGGGCAGTGTTTTCCGTCA
m_circ_0117010_R	TTGCTCGAAACTGGTTCCCT
m_Nphp1_F	TGACTTCCTCAAGCAGAGCC
m_Nphp1_R	TGCTCCGAAAGGTCAAATGGT
m_circ_0000033_F	CTGGAGCAGAAAGTGCGAGA
m_circ_0000033_R	CTGCAAAAATCTGTAGCCTCAA
m_Cep85_F	TCAGGCCTGTTTGTCTCAGGTA
m_Cep85_R	GTGTCTGCCACTCAGTTCCC
m_circ_0000247_F	CAGTCGGCGTGTTTTTACGA
m_circ_0000247_R	CTGGTGTGCCTGGTGAGTAG
m_McuCU_F	GGCCCGTGCTCATCCATATT
m_McuCU_R	GGGTGGTGGAGTTGTGAGAG
m_circ_0006633_F	ATTTGCTGGGATAAGGCGGG
m_circ_0006633_R	CCTTGAACAACTTCCGTGCTG
m_Fggy_F	TGCTATTCTGGGTGCCTGTG
m_Fggy_R	ACGACTTTCCCCACTTTGCT
m_circ_0000944_F	GGCTTGGAACAGGAGCGAC
m_circ_0000944_R	GGCAATCTTCTCCATCTCCTCA
m_Ccdc9_F	AGGAGAAAGAACAGCCGACC
m_Ccdc9_R	AGAAGCCTGTGTGGGTGTCT
m_circ_0009027_F	GCCAGCACAATAAGGACAAGC
m_circ_0009027_R	CCTGTGTGGATTCGAGGTGT
m_Znf362_F	GCACTGCCAGGTGCCG
m_Znf362_R	GAGGTTCGGCCATCCTAGA
