# Supplementary material for: Transcriptomic analysis of human ALS skeletal muscle reveals a disease-specific pattern of dysregulated circRNAs
Source: Aging (Albany NY). 2022 Dec 30;14(24):9832–59. doi: 10.18632/aging.204450 (PMC9831722; doi:10.18632/aging.204450)
Supplement: Supplementary File 2 [file aging-14-204450-s002.xlsx]

## Sheet: ALS compared to Normal
Supplementary File 2. RNA-seq analysis of linear coding and long noncoding RNAs in this study.
	Gene_ID	baseMean	log2FoldChange	lfcSE	stat	pvalue	padj	Chromosome	Gene_Start_BP	Gene-End_bp	Gene_Length	Strand	Percent_GC_Content	Cytoband	Gene_Biotype	Gene_Name	Description	Accession	miRBase_ID
1	ENSG00000000003	372.611	0.343997	0.182956	1.88022	0.0600782	0.200938	chrX	99883667	99894988	2968	-	40.87	q22.1	protein_coding	TSPAN6	tetraspanin 6 [Source:HGNC Symbol;Acc:11858]
2	ENSG00000000005	45.4986	1.45511	0.408276	3.56405	0.000365183	0.00530208	chrX	99839799	99854882	1610	+	40.8	q22.1	protein_coding	TNMD	tenomodulin [Source:HGNC Symbol;Acc:17757]
3	ENSG00000000419	1979.3	-0.32651	0.132549	-2.46332	0.0137656	0.0737871	chr20	49551404	49575092	1207	-	39.85	q13.13	protein_coding	DPM1	dolichyl-phosphate mannosyltransferase polypeptide 1, catalytic subunit [Source:HGNC Symbol;Acc:3005]
4	ENSG00000000457	1758.17	-0.101082	0.120149	-0.841307	0.400176	0.643005	chr1	169818772	169863408	6876	-	40.14	q24.2	protein_coding	SCYL3	SCY1-like 3 (S. cerevisiae) [Source:HGNC Symbol;Acc:19285]
5	ENSG00000000460	882.561	0.03634	0.143334	0.253533	0.799856	0.909233	chr1	169631245	169823221	6354	+	39.22	q24.2	protein_coding	C1orf112	chromosome 1 open reading frame 112 [Source:HGNC Symbol;Acc:25565]
6	ENSG00000000938	173.851	-0.49477	0.313775	-1.57683	0.114835	0.304213	chr1	27938575	27961788	3474	-	52.97	p36.11	protein_coding	FGR	feline Gardner-Rasheed sarcoma viral oncogene homolog [Source:HGNC Symbol;Acc:3697]
7	ENSG00000000971	6751.13	1.30982	0.268768	4.87343	1.1e-06	5.43e-05	chr1	196621008	196716634	8144	+	35.2	q31.3	protein_coding	CFH	complement factor H [Source:HGNC Symbol;Acc:4883]
8	ENSG00000001036	775.165	0.0925517	0.141469	0.654217	0.512972	0.732638	chr6	143815948	143832827	3119	-	39.69	q24.2	protein_coding	FUCA2	fucosidase, alpha-L- 2, plasma [Source:HGNC Symbol;Acc:4008]
9	ENSG00000001084	1663.78	-0.00851651	0.108129	-0.0787625	0.937221	0.973408	chr6	53362139	53481768	8463	-	40.16	p12.1	protein_coding	GCLC	glutamate-cysteine ligase, catalytic subunit [Source:HGNC Symbol;Acc:4311]
10	ENSG00000001167	1544.01	0.530224	0.177862	2.9811	0.00287219	0.024026	chr6	41040684	41067715	3811	+	40	p21.1	protein_coding	NFYA	nuclear transcription factor Y, alpha [Source:HGNC Symbol;Acc:7804]
11	ENSG00000001460	176.912	0.0384847	0.206371	0.186483	0.852066	0.93504	chr1	24683489	24743424	8514	-	44.09	p36.11	protein_coding	STPG1	sperm-tail PG-rich repeat containing 1 [Source:HGNC Symbol;Acc:28070]
12	ENSG00000001461	974.749	-0.116289	0.275037	-0.422814	0.672431	0.837495	chr1	24742284	24799466	9404	+	45	p36.11	protein_coding	NIPAL3	NIPA-like domain containing 3 [Source:HGNC Symbol;Acc:25233]
13	ENSG00000001497	1556.83	0.106026	0.0938382	1.12988	0.258525	0.501298	chrX	64732462	64754655	5589	-	50.45	q12	protein_coding	LAS1L	LAS1-like (S. cerevisiae) [Source:HGNC Symbol;Acc:25726]
14	ENSG00000001561	4228.85	-0.747287	0.191454	-3.90321	9.49e-05	0.00190472	chr6	46097730	46114436	4651	+	36.06	p21.1	protein_coding	ENPP4	ectonucleotide pyrophosphatase/phosphodiesterase 4 (putative) [Source:HGNC Symbol;Acc:3359]
15	ENSG00000001617	1570.17	1.63815	0.389454	4.20627	2.6e-05	0.000698084	chr3	50192478	50226508	4826	+	57.74	p21.31	protein_coding	SEMA3F	sema domain, immunoglobulin domain (Ig), short basic domain, secreted, (semaphorin) 3F [Source:HGNC Symbol;Acc:10728]
16	ENSG00000001626	13.4039	-0.318799	0.506614	-0.629273	0.52917	0.744563	chr7	117105838	117356025	8099	+	36.59	q31.2	protein_coding	CFTR	cystic fibrosis transmembrane conductance regulator (ATP-binding cassette sub-family C, member 7) [Source:HGNC Symbol;Acc:1884]
17	ENSG00000001629	4058.38	0.050775	0.0746527	0.680149	0.49641	0.721114	chr7	91875548	92030698	7130	+	36.77	q21.2	protein_coding	ANKIB1	ankyrin repeat and IBR domain containing 1 [Source:HGNC Symbol;Acc:22215]
18	ENSG00000001630	1654.35	0.186067	0.204843	0.908338	0.3637	0.610146	chr7	91741465	91772266	4074	-	39.91	q21.2	protein_coding	CYP51A1	cytochrome P450, family 51, subfamily A, polypeptide 1 [Source:HGNC Symbol;Acc:2649]
19	ENSG00000001631	3694.86	-0.112423	0.0829594	-1.35515	0.175369	0.398055	chr7	91828283	91875480	6204	-	36.48	q21.2	protein_coding	KRIT1	KRIT1, ankyrin repeat containing [Source:HGNC Symbol;Acc:1573]
20	ENSG00000002016	2441.64	0.0209429	0.14205	0.147434	0.882789	0.949734	chr12	1021243	1099219	4190	-	45.17	p13.33	protein_coding	RAD52	RAD52 homolog (S. cerevisiae) [Source:HGNC Symbol;Acc:9824]
21	ENSG00000002079	69.2981	0.360107	0.276453	1.3026	0.192712	0.421489	chr7	98836417	98908753	6387	+	49.9	q22.1	pseudogene	MYH16	myosin, heavy chain 16 pseudogene [Source:HGNC Symbol;Acc:31038]
22	ENSG00000002330	914.903	-0.278985	0.173861	-1.60464	0.108572	0.293762	chr11	64037302	64052176	1708	-	53.92	q13.1	protein_coding	BAD	BCL2-associated agonist of cell death [Source:HGNC Symbol;Acc:936]
23	ENSG00000002549	4563.73	-0.444149	0.296828	-1.49632	0.13457	0.336902	chr4	17578815	17609595	3785	+	44.17	p15.32	protein_coding	LAP3	leucine aminopeptidase 3 [Source:HGNC Symbol;Acc:18449]
24	ENSG00000002586	4967.1	-0.031648	0.212612	-0.148853	0.88167	0.949352	chrX	2609220	2659350	3284	+	47.39	p22.33	protein_coding	CD99	CD99 molecule [Source:HGNC Symbol;Acc:7082]
25	ENSG00000002587	121.694	-0.507617	0.342607	-1.48163	0.138439	0.343297	chr4	11394774	11431389	8166	-	43.92	p15.33	protein_coding	HS3ST1	heparan sulfate (glucosamine) 3-O-sulfotransferase 1 [Source:HGNC Symbol;Acc:5194]
26	ENSG00000002726	8.74365	-0.0463182	0.704591	-0.0657377	0.947587	0.977472	chr7	150521715	150558592	3824	+	47.8	q36.1	protein_coding	AOC1	amine oxidase, copper containing 1 [Source:HGNC Symbol;Acc:80]
27	ENSG00000002745	11.5204	0.138293	0.48918	0.282703	0.777404	0.896915	chr7	120965421	120981158	3261	+	38.61	q31.31	protein_coding	WNT16	wingless-type MMTV integration site family, member 16 [Source:HGNC Symbol;Acc:16267]
28	ENSG00000002746	298.286	-1.80127	0.479448	-3.75696	0.000171991	0.00300675	chr7	43152198	43605600	13965	+	42.03	p14.1	protein_coding	HECW1	HECT, C2 and WW domain containing E3 ubiquitin protein ligase 1 [Source:HGNC Symbol;Acc:22195]
29	ENSG00000002822	2115.66	-0.198987	0.147593	-1.34821	0.177591	0.400889	chr7	1855429	2272878	6955	-	55.65	p22.3	protein_coding	MAD1L1	MAD1 mitotic arrest deficient-like 1 (yeast) [Source:HGNC Symbol;Acc:6762]
30	ENSG00000002834	2924.04	0.162441	0.20581	0.789277	0.42995	0.66915	chr17	37026112	37078023	7061	+	53.69	q12	protein_coding	LASP1	LIM and SH3 protein 1 [Source:HGNC Symbol;Acc:6513]
31	ENSG00000002919	714.277	-0.199369	0.160649	-1.24102	0.214597	0.449327	chr17	46180719	46200436	3606	+	48	q21.32	protein_coding	SNX11	sorting nexin 11 [Source:HGNC Symbol;Acc:14975]
32	ENSG00000002933	162.22	0.723683	0.3755	1.92725	0.0539479	0.187512	chr7	150497491	150502208	3479	+	57.57	q36.1	protein_coding	TMEM176A	transmembrane protein 176A [Source:HGNC Symbol;Acc:24930]
33	ENSG00000003056	3611.01	-0.076286	0.0842755	-0.905197	0.365361	0.611877	chr12	9092959	9102551	3777	-	42.71	p13.31	protein_coding	M6PR	mannose-6-phosphate receptor (cation dependent) [Source:HGNC Symbol;Acc:6752]
34	ENSG00000003096	536.247	0.0791188	0.203755	0.388304	0.697791	0.853053	chrX	117031776	117251303	6983	-	36.56	q24	protein_coding	KLHL13	kelch-like family member 13 [Source:HGNC Symbol;Acc:22931]
35	ENSG00000003137	745.987	1.98737	0.327657	6.06539	1.32e-09	1.69e-07	chr2	72356367	72375167	5015	-	59.96	p13.2	protein_coding	CYP26B1	cytochrome P450, family 26, subfamily B, polypeptide 1 [Source:HGNC Symbol;Acc:20581]
36	ENSG00000003147	373.891	0.128077	0.172034	0.744487	0.456582	0.689625	chr7	8152814	8302317	4891	-	40.3	p21.3	protein_coding	ICA1	islet cell autoantigen 1, 69kDa [Source:HGNC Symbol;Acc:5343]
37	ENSG00000003249	1981.36	-0.716941	0.510726	-1.40377	0.160388	0.376803	chr16	90071273	90086536	3522	-	59.39	q24.3	protein_coding	DBNDD1	dysbindin (dystrobrevin binding protein 1) domain containing 1 [Source:HGNC Symbol;Acc:28455]
38	ENSG00000003393	5069.7	-0.203147	0.103884	-1.95551	0.0505234	0.179585	chr2	202565277	202645912	10381	-	38.06	q33.1	protein_coding	ALS2	amyotrophic lateral sclerosis 2 (juvenile) [Source:HGNC Symbol;Acc:443]
39	ENSG00000003400	1097.64	-0.106936	0.192206	-0.556359	0.577965	0.777638	chr2	202047604	202094129	7598	+	42.31	q33.1	protein_coding	CASP10	caspase 10, apoptosis-related cysteine peptidase [Source:HGNC Symbol;Acc:1500]
40	ENSG00000003402	40256.1	0.37042	0.210894	1.75643	0.0790158	0.240023	chr2	201980827	202041410	22528	+	44.35	q33.1	protein_coding	CFLAR	CASP8 and FADD-like apoptosis regulator [Source:HGNC Symbol;Acc:1876]
41	ENSG00000003436	3899.37	0.222459	0.209585	1.06142	0.288498	0.534672	chr2	188328957	188430487	11714	-	36.6	q32.1	protein_coding	TFPI	tissue factor pathway inhibitor (lipoprotein-associated coagulation inhibitor) [Source:HGNC Symbol;Acc:11760]
42	ENSG00000003509	2123.76	-0.0718481	0.123645	-0.581082	0.561185	0.766847	chr2	37458774	37480546	3651	+	38.97	p22.2	protein_coding	NDUFAF7	NADH dehydrogenase (ubiquinone) complex I, assembly factor 7 [Source:HGNC Symbol;Acc:28816]
43	ENSG00000003756	12303.5	0.037613	0.0898713	0.418521	0.675566	0.839337	chr3	50126341	50156454	10368	+	44.45	p21.31	protein_coding	RBM5	RNA binding motif protein 5 [Source:HGNC Symbol;Acc:9902]
44	ENSG00000003987	501.524	0.0916234	0.190481	0.481011	0.630509	0.810609	chr8	17155539	17271037	5692	-	40.36	p22	protein_coding	MTMR7	myotubularin related protein 7 [Source:HGNC Symbol;Acc:7454]
45	ENSG00000003989	31671.1	-1.24127	0.308725	-4.02065	5.8e-05	0.00130916	chr8	17354597	17428082	7905	+	40.13	p22	protein_coding	SLC7A2	solute carrier family 7 (cationic amino acid transporter, y+ system), member 2 [Source:HGNC Symbol;Acc:11060]
46	ENSG00000004059	2916.07	0.177728	0.121886	1.45814	0.144802	0.353506	chr7	127228399	127231759	1871	+	56.5	q32.1	protein_coding	ARF5	ADP-ribosylation factor 5 [Source:HGNC Symbol;Acc:658]
47	ENSG00000004139	1278.18	-0.0351122	0.133619	-0.262778	0.792722	0.905321	chr17	26691378	26728065	8132	+	51.82	q11.2	protein_coding	SARM1	sterile alpha and TIR motif containing 1 [Source:HGNC Symbol;Acc:17074]
48	ENSG00000004142	11070.4	-0.349356	0.125487	-2.78401	0.00536917	0.0376715	chr17	26673659	26684545	2662	-	49.85	q11.2	protein_coding	POLDIP2	polymerase (DNA-directed), delta interacting protein 2 [Source:HGNC Symbol;Acc:23781]
49	ENSG00000004399	4536.41	0.0393964	0.174358	0.225951	0.821239	0.920252	chr3	129274018	129325661	9738	-	58.39	q22.1	protein_coding	PLXND1	plexin D1 [Source:HGNC Symbol;Acc:9107]
50	ENSG00000004455	7770.38	-0.356198	0.218352	-1.6313	0.102827	0.284021	chr1	33473585	33546597	5683	-	46.32	p35.1	protein_coding	AK2	adenylate kinase 2 [Source:HGNC Symbol;Acc:362]
51	ENSG00000004468	4212.73	-1.50311	0.380735	-3.94793	7.88e-05	0.00166322	chr4	15779898	15854853	6855	+	41.09	p15.32	protein_coding	CD38	CD38 molecule [Source:HGNC Symbol;Acc:1667]
52	ENSG00000004478	5421.53	-0.0876916	0.176551	-0.496692	0.619406	0.803887	chr12	2904119	2914576	3958	+	51.61	p13.33	protein_coding	FKBP4	FK506 binding protein 4, 59kDa [Source:HGNC Symbol;Acc:3720]
53	ENSG00000004487	4869.55	-0.265303	0.100706	-2.63443	0.00842776	0.0519736	chr1	23345941	23410182	5447	+	39.16	p36.12	protein_coding	KDM1A	lysine (K)-specific demethylase 1A [Source:HGNC Symbol;Acc:29079]
54	ENSG00000004534	8706.45	-0.0848073	0.0664469	-1.27632	0.201844	0.433419	chr3	49977440	50137478	7300	+	44.14	p21.31	protein_coding	RBM6	RNA binding motif protein 6 [Source:HGNC Symbol;Acc:9903]
55	ENSG00000004660	309.524	0.335424	0.275647	1.21686	0.223657	0.460313	chr17	3763609	3798185	7424	-	57.17	p13.2	protein_coding	CAMKK1	calcium/calmodulin-dependent protein kinase kinase 1, alpha [Source:HGNC Symbol;Acc:1469]
56	ENSG00000004700	2389.79	0.0260247	0.112547	0.231234	0.817133	0.918021	chr12	21621845	21654603	3778	-	37.57	p12.1	protein_coding	RECQL	RecQ protein-like (DNA helicase Q1-like) [Source:HGNC Symbol;Acc:9948]
57	ENSG00000004766	2929.97	0.00435028	0.0905896	0.0480219	0.961699	0.982906	chr7	92861653	92988338	7359	+	34.84	q21.3	protein_coding	CCDC132	coiled-coil domain containing 132 [Source:HGNC Symbol;Acc:25956]
58	ENSG00000004776	6820.54	-0.478906	0.41672	-1.14923	0.250462	0.492545	chr19	36245469	36248980	1722	-	62.56	q13.12	protein_coding	HSPB6	heat shock protein, alpha-crystallin-related, B6 [Source:HGNC Symbol;Acc:26511]
59	ENSG00000004777	170.705	0.480742	0.173039	2.77823	0.00546552	0.03816	chr19	36265434	36279724	5260	+	60.93	q13.12	protein_coding	ARHGAP33	Rho GTPase activating protein 33 [Source:HGNC Symbol;Acc:23085]
60	ENSG00000004779	6527.74	-0.456343	0.165951	-2.74987	0.00596188	0.0405169	chr16	23592323	23607677	1600	-	48.8	p12.2	protein_coding	NDUFAB1	NADH dehydrogenase (ubiquinone) 1, alpha/beta subcomplex, 1, 8kDa [Source:HGNC Symbol;Acc:7694]
61	ENSG00000004799	43926.5	-0.720281	0.771132	-0.934057	0.350275	0.597378	chr7	95212811	95225803	4519	-	36.07	q21.3	protein_coding	PDK4	pyruvate dehydrogenase kinase, isozyme 4 [Source:HGNC Symbol;Acc:8812]
62	ENSG00000004809	4.73807	-1.66335	0.778991	-2.13526	0.0327394	0.133473	chr6	110745890	110797844	3791	-	41.32	q21	protein_coding	SLC22A16	solute carrier family 22 (organic cation/carnitine transporter), member 16 [Source:HGNC Symbol;Acc:20302]
63	ENSG00000004838	115.974	-0.386682	0.1809	-2.13755	0.0325535	0.133017	chr3	50378541	50384283	4009	-	57.81	p21.31	protein_coding	ZMYND10	zinc finger, MYND-type containing 10 [Source:HGNC Symbol;Acc:19412]
64	ENSG00000004846	33.0193	2.43147	0.563712	4.31331	1.61e-05	0.000480977	chr7	20654830	20816658	9257	+	37.73	p21.1	protein_coding	ABCB5	ATP-binding cassette, sub-family B (MDR/TAP), member 5 [Source:HGNC Symbol;Acc:46]
65	ENSG00000004848	506.315	0.0834232	0.215037	0.387949	0.698054	0.853222	chrX	25021811	25034065	2876	-	54.42	p21.3	protein_coding	ARX	aristaless related homeobox [Source:HGNC Symbol;Acc:18060]
66	ENSG00000004864	1133.21	-0.128738	0.154998	-0.830578	0.406212	0.648591	chr7	95749532	95951459	3710	-	39.76	q21.3	protein_coding	SLC25A13	solute carrier family 25 (aspartate/glutamate carrier), member 13 [Source:HGNC Symbol;Acc:10983]
67	ENSG00000004866	1549.2	0.0824701	0.162342	0.508003	0.611451	0.798979	chr7	116593292	116870157	6742	+	39.15	q31.2	protein_coding	ST7	suppression of tumorigenicity 7 [Source:HGNC Symbol;Acc:11351]	MI0021277	hsa-mir-6132
68	ENSG00000004897	6787.45	0.0211722	0.0905967	0.233698	0.81522	0.917318	chr17	45195069	45266788	6824	-	38.66	q21.32	protein_coding	CDC27	cell division cycle 27 [Source:HGNC Symbol;Acc:1728]
69	ENSG00000004939	57.6619	-1.48174	0.624515	-2.37262	0.0176624	0.0875766	chr17	42325753	42345509	5287	-	55.8	q21.31	protein_coding	SLC4A1	solute carrier family 4 (anion exchanger), member 1 (Diego blood group) [Source:HGNC Symbol;Acc:11027]
70	ENSG00000004948	159.828	-0.196941	0.28898	-0.681503	0.495553	0.720504	chr7	93053799	93204042	4036	-	35.2	q21.3	protein_coding	CALCR	calcitonin receptor [Source:HGNC Symbol;Acc:1440]
71	ENSG00000004961	1753.55	-0.557261	0.171358	-3.25203	0.00114584	0.0123023	chrX	11129421	11141198	2335	+	42.99	p22.2	protein_coding	HCCS	holocytochrome c synthase [Source:HGNC Symbol;Acc:4837]
72	ENSG00000004975	1407.43	-0.118176	0.0973206	-1.2143	0.224634	0.461574	chr17	7128660	7137864	5350	-	55.14	p13.1	protein_coding	DVL2	dishevelled segment polarity protein 2 [Source:HGNC Symbol;Acc:3086]
73	ENSG00000005007	4992.48	-0.166531	0.146062	-1.14014	0.254227	0.496691	chr19	18942747	18979045	8600	+	55.15	p13.11	protein_coding	UPF1	UPF1 regulator of nonsense transcripts homolog (yeast) [Source:HGNC Symbol;Acc:9962]
74	ENSG00000005020	792.128	-0.165459	0.274212	-0.603396	0.546246	0.756803	chr7	26706681	27034858	5520	-	36.94	p15.2	protein_coding	SKAP2	src kinase associated phosphoprotein 2 [Source:HGNC Symbol;Acc:15687]
75	ENSG00000005022	1237.79	0.706924	0.194148	3.64115	0.000271422	0.00424199	chrX	118602363	118605282	1500	+	53.25	q24	protein_coding	SLC25A5	solute carrier family 25 (mitochondrial carrier; adenine nucleotide translocator), member 5 [Source:HGNC Symbol;Acc:10991]
76	ENSG00000005059	260.528	0.187412	0.203911	0.919083	0.358052	0.604859	chr4	110481361	110609874	3558	+	41.02	q25	protein_coding	CCDC109B	coiled-coil domain containing 109B [Source:HGNC Symbol;Acc:26076]
77	ENSG00000005073	404.699	-0.353895	0.498637	-0.709725	0.477875	0.706861	chr7	27221129	27224842	2307	-	55.22	p15.2	protein_coding	HOXA11	homeobox A11 [Source:HGNC Symbol;Acc:5101]
78	ENSG00000005075	3085.34	-0.440666	0.107671	-4.09272	4.26e-05	0.00102465	chr7	102113565	102119354	962	-	55.04	q22.1	protein_coding	POLR2J	polymerase (RNA) II (DNA directed) polypeptide J, 13.3kDa [Source:HGNC Symbol;Acc:9197]
79	ENSG00000005100	1158.32	0.318809	0.162807	1.95821	0.0502059	0.17895	chr17	5344232	5372380	5872	-	45.81	p13.2	protein_coding	DHX33	DEAH (Asp-Glu-Ala-His) box polypeptide 33 [Source:HGNC Symbol;Acc:16718]
80	ENSG00000005102	563.115	-0.151627	0.285974	-0.530213	0.595964	0.789571	chr17	41717756	41739322	2707	-	51.61	q21.31	protein_coding	MEOX1	mesenchyme homeobox 1 [Source:HGNC Symbol;Acc:7013]
81	ENSG00000005108	415.685	0.357114	0.225189	1.58584	0.112775	0.300407	chr7	11409984	11871824	10923	-	35.51	p21.3	protein_coding	THSD7A	thrombospondin, type I, domain containing 7A [Source:HGNC Symbol;Acc:22207]
82	ENSG00000005156	2924.52	0.340261	0.134719	2.52571	0.0115464	0.0651738	chr17	33307513	33332083	8240	+	47.71	q12	protein_coding	LIG3	ligase III, DNA, ATP-dependent [Source:HGNC Symbol;Acc:6600]
83	ENSG00000005175	1935.82	-0.498256	0.156635	-3.181	0.00146766	0.0146473	chr12	48057070	48099844	3343	-	36.73	q13.11	protein_coding	RPAP3	RNA polymerase II associated protein 3 [Source:HGNC Symbol;Acc:26151]
84	ENSG00000005187	248.743	-0.435384	0.13351	-3.26105	0.00110999	0.0120251	chr16	20621565	20808903	5095	+	41.08	p12.3	protein_coding	ACSM3	acyl-CoA synthetase medium-chain family member 3 [Source:HGNC Symbol;Acc:10522]
85	ENSG00000005189	163.647	0.625969	0.234699	2.66711	0.0076506	0.0486571	chr16	20817751	20860987	4111	+	39.89	p12.3	protein_coding	AC004381.6	Putative RNA exonuclease NEF-sp [Source:UniProtKB/Swiss-Prot;Acc:Q96IC2]
86	ENSG00000005194	1918.45	-0.216853	0.134215	-1.61571	0.106157	0.289452	chr16	57462081	57481440	3509	-	44.41	q21	protein_coding	CIAPIN1	cytokine induced apoptosis inhibitor 1 [Source:HGNC Symbol;Acc:28050]
87	ENSG00000005206	2793.59	0.0409977	0.233932	0.175255	0.86088	0.93908	chr19	2328614	2355099	7096	+	61.04	p13.3	processed_transcript	SPPL2B	signal peptide peptidase like 2B [Source:HGNC Symbol;Acc:30627]
88	ENSG00000005238	1137.95	0.722536	0.132106	5.46935	4.52e-08	3.87e-06	chr9	35104109	35116338	6409	-	54.68	p13.3	protein_coding	FAM214B	family with sequence similarity 214, member B [Source:HGNC Symbol;Acc:25666]
89	ENSG00000005243	2423.01	0.345527	0.107683	3.20873	0.00133321	0.0136952	chr17	46103533	46115392	1847	-	52.7	q21.32	protein_coding	COPZ2	coatomer protein complex, subunit zeta 2 [Source:HGNC Symbol;Acc:19356]
90	ENSG00000005249	409.567	0.390501	0.384731	1.015	0.310108	0.55844	chr7	106685094	106802256	4318	+	38.63	q22.3	protein_coding	PRKAR2B	protein kinase, cAMP-dependent, regulatory, type II, beta [Source:HGNC Symbol;Acc:9392]
91	ENSG00000005302	1815.28	-0.209388	0.118469	-1.76744	0.0771541	0.236456	chrX	11776278	11793870	6494	+	42.85	p22.2	protein_coding	MSL3	male-specific lethal 3 homolog (Drosophila) [Source:HGNC Symbol;Acc:7370]
92	ENSG00000005339	8854.07	-0.340876	0.137189	-2.48471	0.0129658	0.0706793	chr16	3775055	3930727	15068	-	45.01	p13.3	protein_coding	CREBBP	CREB binding protein [Source:HGNC Symbol;Acc:2348]
93	ENSG00000005379	1545.01	-0.126825	0.224895	-0.563931	0.572801	0.774716	chr17	56378592	56406152	11382	-	57.85	q22	protein_coding	BZRAP1	benzodiazepine receptor (peripheral) associated protein 1 [Source:HGNC Symbol;Acc:16831]
94	ENSG00000005381	65.0243	0.893304	0.326156	2.73888	0.00616483	0.0415352	chr17	56347217	56358296	3622	-	55.13	q22	protein_coding	MPO	myeloperoxidase [Source:HGNC Symbol;Acc:7218]
95	ENSG00000005421	69.8968	0.229496	0.242302	0.947146	0.343565	0.591057	chr7	94926988	95025673	2988	-	39.93	q21.3	protein_coding	PON1	paraoxonase 1 [Source:HGNC Symbol;Acc:9204]
96	ENSG00000005436	6463.39	0.461391	0.208828	2.20943	0.0271446	0.117324	chr2	75879126	75938115	5465	-	36.39	p12	protein_coding	GCFC2	GC-rich sequence DNA-binding factor 2 [Source:HGNC Symbol;Acc:1317]
97	ENSG00000005448	104.315	0.384574	0.205846	1.86826	0.0617255	0.204213	chr2	74648805	74652882	2860	+	54.68	p13.1	protein_coding	WDR54	WD repeat domain 54 [Source:HGNC Symbol;Acc:25770]
98	ENSG00000005469	1589.96	0.145305	0.155508	0.934392	0.350102	0.59722	chr7	86974997	87029111	4979	+	37.43	q21.12	protein_coding	CROT	carnitine O-octanoyltransferase [Source:HGNC Symbol;Acc:2366]
99	ENSG00000005471	1634.4	-1.23057	0.389405	-3.16012	0.00157702	0.0154305	chr7	87031013	87109751	7494	-	38.6	q21.12	protein_coding	ABCB4	ATP-binding cassette, sub-family B (MDR/TAP), member 4 [Source:HGNC Symbol;Acc:45]
100	ENSG00000005483	7519.56	-0.124688	0.0791263	-1.57581	0.11507	0.304612	chr7	104654626	104754808	9227	+	37.46	q22.3	protein_coding	KMT2E	lysine (K)-specific methyltransferase 2E [Source:HGNC Symbol;Acc:18541]
101	ENSG00000005486	692.899	-0.120386	0.239051	-0.503599	0.614543	0.80135	chr7	75471920	75518244	2441	+	47.79	q11.23	protein_coding	RHBDD2	rhomboid domain containing 2 [Source:HGNC Symbol;Acc:23082]
102	ENSG00000005513	175.13	1.66434	0.309316	5.3807	7.42e-08	5.85e-06	chr16	1031808	1036979	4432	+	64.79	p13.3	protein_coding	SOX8	SRY (sex determining region Y)-box 8 [Source:HGNC Symbol;Acc:11203]
103	ENSG00000005700	12053.4	-0.297139	0.165046	-1.80034	0.0718075	0.225731	chr6	82879700	82957471	8722	-	36.07	q14.1	protein_coding	IBTK	inhibitor of Bruton agammaglobulinemia tyrosine kinase [Source:HGNC Symbol;Acc:17853]
104	ENSG00000005801	1568.24	0.0421793	0.116895	0.36083	0.718227	0.86479	chr11	3360491	3400448	5705	-	41.43	p15.4	protein_coding	ZNF195	zinc finger protein 195 [Source:HGNC Symbol;Acc:12986]
105	ENSG00000005810	17753.6	-0.0542421	0.124058	-0.437231	0.661944	0.830901	chr13	77618792	77901185	15943	-	35.72	q22.3	protein_coding	MYCBP2	MYC binding protein 2, E3 ubiquitin protein ligase [Source:HGNC Symbol;Acc:23386]
106	ENSG00000005812	4321.55	-0.230166	0.081931	-2.80927	0.00496547	0.0355518	chr13	77566740	77601330	4651	-	38.37	q22.3	protein_coding	FBXL3	F-box and leucine-rich repeat protein 3 [Source:HGNC Symbol;Acc:13599]
107	ENSG00000005844	292.635	-0.0392107	0.261572	-0.149904	0.88084	0.948915	chr16	30483979	30534506	6472	+	50.46	p11.2	protein_coding	ITGAL	integrin, alpha L (antigen CD11A (p180), lymphocyte function-associated antigen 1; alpha polypeptide) [Source:HGNC Symbol;Acc:6148]
108	ENSG00000005882	7812.69	-1.11203	0.273936	-4.05946	4.92e-05	0.00114316	chr17	48172101	48189516	5481	+	56.67	q21.33	protein_coding	PDK2	pyruvate dehydrogenase kinase, isozyme 2 [Source:HGNC Symbol;Acc:8810]
109	ENSG00000005884	1739.95	-0.376102	0.286316	-1.31359	0.188984	0.416443	chr17	48133332	48167845	9802	+	52.65	q21.33	protein_coding	ITGA3	integrin, alpha 3 (antigen CD49C, alpha 3 subunit of VLA-3 receptor) [Source:HGNC Symbol;Acc:6139]
110	ENSG00000005889	8835.59	0.107811	0.221467	0.486805	0.626396	0.808244	chrX	24167290	24234372	9037	+	40.77	p22.11	protein_coding	ZFX	zinc finger protein, X-linked [Source:HGNC Symbol;Acc:12869]
111	ENSG00000005893	13736.5	-0.470935	0.159556	-2.95153	0.00316202	0.0257441	chrX	119561682	119603220	5617	-	38.79	q24	protein_coding	LAMP2	lysosomal-associated membrane protein 2 [Source:HGNC Symbol;Acc:6501]
112	ENSG00000005955	3908.03	0.0726711	0.103185	0.704282	0.481257	0.709702	chr17	34900737	34946278	9729	+	42.16	q12	protein_coding	GGNBP2	gametogenetin binding protein 2 [Source:HGNC Symbol;Acc:19357]
113	ENSG00000005961	62.4849	0.042246	0.32513	0.129936	0.896617	0.955496	chr17	42449548	42466873	5551	-	54.83	q21.31	protein_coding	ITGA2B	integrin, alpha 2b (platelet glycoprotein IIb of IIb/IIIa complex, antigen CD41) [Source:HGNC Symbol;Acc:6138]
114	ENSG00000005981	2617.04	-1.13122	0.36249	-3.12069	0.0018043	0.0170965	chr7	95107756	95169544	4605	+	38.27	q21.3	protein_coding	ASB4	ankyrin repeat and SOCS box containing 4 [Source:HGNC Symbol;Acc:16009]
115	ENSG00000006007	5649.94	-0.482641	0.295214	-1.63489	0.102073	0.282578	chr16	19513015	19533467	4412	-	40.17	p12.3	protein_coding	GDE1	glycerophosphodiester phosphodiesterase 1 [Source:HGNC Symbol;Acc:29644]
116	ENSG00000006015	2086.91	-0.248343	0.200564	-1.23822	0.215635	0.450712	chr19	18699495	18703146	3370	+	60.24	p13.11	protein_coding	C19orf60	chromosome 19 open reading frame 60 [Source:HGNC Symbol;Acc:26098]
117	ENSG00000006016	1024.33	-0.158382	0.216717	-0.730824	0.464887	0.696408	chr19	18683030	18718551	3018	-	55.32	p13.11	protein_coding	CRLF1	cytokine receptor-like factor 1 [Source:HGNC Symbol;Acc:2364]
118	ENSG00000006025	4349.55	-0.331051	0.401848	-0.823822	0.410041	0.651793	chr17	45884738	45899200	6572	-	57.86	q21.32	protein_coding	OSBPL7	oxysterol binding protein-like 7 [Source:HGNC Symbol;Acc:16387]
119	ENSG00000006042	248.554	0.71179	0.168962	4.21273	2.52e-05	0.000680981	chr17	31254928	31272124	5187	+	48.47	q11.2	protein_coding	TMEM98	transmembrane protein 98 [Source:HGNC Symbol;Acc:24529]
120	ENSG00000006047	931.24	-0.397222	0.334808	-1.18642	0.235457	0.474269	chr17	7191571	7197934	4618	-	57.92	p13.1	protein_coding	YBX2	Y box binding protein 2 [Source:HGNC Symbol;Acc:17948]
121	ENSG00000006062	2036.1	0.328579	0.204658	1.60551	0.108382	0.2934	chr17	43340488	43394414	5132	-	49.97	q21.31	processed_transcript	MAP3K14	mitogen-activated protein kinase kinase kinase 14 [Source:HGNC Symbol;Acc:6853]
122	ENSG00000006071	420.564	1.61033	0.419893	3.83509	0.000125516	0.00236307	chr11	17414432	17498449	6835	-	50.03	p15.1	protein_coding	ABCC8	ATP-binding cassette, sub-family C (CFTR/MRP), member 8 [Source:HGNC Symbol;Acc:59]
123	ENSG00000006074	9.04813	2.02192	0.731771	2.76305	0.00572644	0.0393856	chr17	34391640	34399392	1397	+	44.43	q12	protein_coding	CCL18	chemokine (C-C motif) ligand 18 (pulmonary and activation-regulated) [Source:HGNC Symbol;Acc:10616]
124	ENSG00000006075	18.7485	1.13554	0.737855	1.53897	0.123811	0.319385	chr17	34415602	34417515	1494	-	52.19	q12	protein_coding	CCL3	chemokine (C-C motif) ligand 3 [Source:HGNC Symbol;Acc:10627]
125	ENSG00000006114	3316.38	-0.0700437	0.107244	-0.653122	0.513678	0.732912	chr17	35874900	35969544	14277	-	40.82	q12	protein_coding	SYNRG	synergin, gamma [Source:HGNC Symbol;Acc:557]
126	ENSG00000006118	417.951	-0.48057	0.213404	-2.25193	0.0243269	0.109057	chr11	60691935	60704631	7271	+	58.71	q12.2	protein_coding	TMEM132A	transmembrane protein 132A [Source:HGNC Symbol;Acc:31092]
127	ENSG00000006125	7456.71	-0.0605578	0.103147	-0.587101	0.557136	0.764598	chr17	33905065	34053436	7797	+	39.93	q12	protein_coding	AP2B1	adaptor-related protein complex 2, beta 1 subunit [Source:HGNC Symbol;Acc:563]
128	ENSG00000006194	2224.45	0.0564909	0.118356	0.477297	0.633151	0.81219	chr16	3313743	3351401	9329	+	47.12	p13.3	protein_coding	ZNF263	zinc finger protein 263 [Source:HGNC Symbol;Acc:13056]
129	ENSG00000006210	549.721	-0.52286	0.295257	-1.77086	0.0765832	0.235336	chr16	57406370	57418960	5983	+	53.7	q21	protein_coding	CX3CL1	chemokine (C-X3-C motif) ligand 1 [Source:HGNC Symbol;Acc:10647]
130	ENSG00000006282	2668.4	0.786151	0.260134	3.02211	0.00251023	0.0216682	chr17	48620419	48633213	5237	+	57.05	q21.33	protein_coding	SPATA20	spermatogenesis associated 20 [Source:HGNC Symbol;Acc:26125]
131	ENSG00000006283	39.6657	0.19512	0.3505	0.556691	0.577739	0.777594	chr17	48638429	48704835	9709	+	56.83	q21.33	protein_coding	CACNA1G	calcium channel, voltage-dependent, T type, alpha 1G subunit [Source:HGNC Symbol;Acc:1394]
132	ENSG00000006327	2335.44	1.64137	0.506583	3.24008	0.00119498	0.012716	chr16	3068446	3072384	1848	+	60.12	p13.3	protein_coding	TNFRSF12A	tumor necrosis factor receptor superfamily, member 12A [Source:HGNC Symbol;Acc:18152]
133	ENSG00000006377	4.51391	2.02081	0.82158	2.45966	0.0139067	0.0744026	chr7	96634860	96640351	3449	+	49.51	q21.3	protein_coding	DLX6	distal-less homeobox 6 [Source:HGNC Symbol;Acc:2919]
134	ENSG00000006432	905.691	0.690331	0.225163	3.06592	0.00217004	0.0194746	chr14	71189243	71276251	12386	-	44.98	q24.2	protein_coding	MAP3K9	mitogen-activated protein kinase kinase kinase 9 [Source:HGNC Symbol;Acc:6861]
135	ENSG00000006451	1448.95	-0.441432	0.145857	-3.02646	0.00247432	0.0214457	chr7	39663082	39747723	3665	+	39.69	p14.1	protein_coding	RALA	v-ral simian leukemia viral oncogene homolog A (ras related) [Source:HGNC Symbol;Acc:9839]
136	ENSG00000006453	638.67	0.175209	0.127195	1.37748	0.168363	0.388251	chr7	97920963	98030380	4798	-	46.77	q22.1	protein_coding	BAIAP2L1	BAI1-associated protein 2-like 1 [Source:HGNC Symbol;Acc:21649]
137	ENSG00000006459	7814.81	0.324449	0.179089	1.81166	0.070038	0.222094	chr7	139784546	139876835	9430	-	39.18	q34	protein_coding	KDM7A	lysine (K)-specific demethylase 7A [Source:HGNC Symbol;Acc:22224]
138	ENSG00000006468	258.268	0.564665	0.269556	2.0948	0.0361889	0.143226	chr7	13930853	14031050	9686	-	36.3	p21.2	protein_coding	ETV1	ets variant 1 [Source:HGNC Symbol;Acc:3490]
139	ENSG00000006530	1671.95	-0.0205964	0.0893487	-0.230517	0.81769	0.918232	chr7	141250989	141355044	6547	+	39.59	q34	protein_coding	AGK	acylglycerol kinase [Source:HGNC Symbol;Acc:21869]
140	ENSG00000006534	221.417	0.153659	0.218836	0.702163	0.482577	0.710487	chr11	67776048	67796744	6621	+	58.4	q13.2	protein_coding	ALDH3B1	aldehyde dehydrogenase 3 family, member B1 [Source:HGNC Symbol;Acc:410]
141	ENSG00000006555	6.12171	-0.323708	0.654844	-0.494328	0.621074	0.804994	chr1	55245385	55266940	6055	-	52.26	p32.3	protein_coding	TTC22	tetratricopeptide repeat domain 22 [Source:HGNC Symbol;Acc:26067]
142	ENSG00000006576	19968.1	-1.38892	0.429533	-3.23356	0.00122259	0.0129182	chr7	77428122	77586818	8631	+	37.65	q11.23	protein_coding	PHTF2	putative homeodomain transcription factor 2 [Source:HGNC Symbol;Acc:13411]
143	ENSG00000006607	3357.71	-0.273784	0.119106	-2.29865	0.0215247	0.100277	chr2	242295658	242434256	14413	+	45.6	q37.3	protein_coding	FARP2	FERM, RhoGEF and pleckstrin domain protein 2 [Source:HGNC Symbol;Acc:16460]
144	ENSG00000006611	5.5746	-1.80272	0.781685	-2.30619	0.0210999	0.0990261	chr11	17515442	17565963	4187	-	51.78	p15.1	protein_coding	USH1C	Usher syndrome 1C (autosomal recessive, severe) [Source:HGNC Symbol;Acc:12597]
145	ENSG00000006625	1220.57	-0.0490856	0.110685	-0.443472	0.657424	0.828063	chr7	30536237	30591095	1905	-	42.02	p14.3	protein_coding	GGCT	gamma-glutamylcyclotransferase [Source:HGNC Symbol;Acc:21705]
146	ENSG00000006634	280.03	0.00432764	0.172471	0.025092	0.979982	0.990972	chr7	87505531	87538856	4583	+	36.72	q21.12	protein_coding	DBF4	DBF4 homolog (S. cerevisiae) [Source:HGNC Symbol;Acc:17364]
147	ENSG00000006638	68.9266	-0.373829	0.233816	-1.59882	0.10986	0.295677	chr19	3594504	3606838	2793	-	55.77	p13.3	protein_coding	TBXA2R	thromboxane A2 receptor [Source:HGNC Symbol;Acc:11608]
148	ENSG00000006652	6388.19	-0.214649	0.178424	-1.20302	0.228967	0.466862	chr7	112063023	112121072	6481	+	39.45	q31.1	protein_coding	IFRD1	interferon-related developmental regulator 1 [Source:HGNC Symbol;Acc:5456]
149	ENSG00000006659	4.71028	0.537138	0.798509	0.672676	0.501153	0.724352	chr19	40194946	40200084	1079	+	45.3	q13.2	protein_coding	LGALS14	lectin, galactoside-binding, soluble, 14 [Source:HGNC Symbol;Acc:30054]
150	ENSG00000006695	2800.93	-0.618054	0.119649	-5.16554	2.4e-07	1.59e-05	chr17	13972813	14111994	3172	+	38.47	p12	protein_coding	COX10	cytochrome c oxidase assembly homolog 10 (yeast) [Source:HGNC Symbol;Acc:2260]
151	ENSG00000006704	4687.55	-0.710223	0.211187	-3.36301	0.000770969	0.0092831	chr7	73868120	74016931	6498	+	52.72	q11.23	protein_coding	GTF2IRD1	GTF2I repeat domain containing 1 [Source:HGNC Symbol;Acc:4661]
152	ENSG00000006712	1752.03	0.0407883	0.209419	0.194769	0.845574	0.93202	chr19	39876492	39881835	2668	-	52.73	q13.2	protein_coding	PAF1	Paf1, RNA polymerase II associated factor, homolog (S. cerevisiae) [Source:HGNC Symbol;Acc:25459]
153	ENSG00000006715	2124.29	0.120042	0.0778602	1.54176	0.123131	0.317928	chr7	38762563	38971994	7801	-	38.35	p14.1	protein_coding	VPS41	vacuolar protein sorting 41 homolog (S. cerevisiae) [Source:HGNC Symbol;Acc:12713]
154	ENSG00000006740	414.25	-0.228029	0.195274	-1.16774	0.242912	0.483486	chr17	12692856	12894960	9281	+	42.68	p12	protein_coding	ARHGAP44	Rho GTPase activating protein 44 [Source:HGNC Symbol;Acc:29096]
155	ENSG00000006744	5139.52	0.10443	0.125119	0.834647	0.403917	0.646609	chr17	12895708	12921504	6345	-	48.08	p12	protein_coding	ELAC2	elaC ribonuclease Z 2 [Source:HGNC Symbol;Acc:14198]
156	ENSG00000006747	36.5358	0.401953	0.542413	0.741047	0.458665	0.691032	chr7	12610203	12693228	5048	+	38.55	p21.3	protein_coding	SCIN	scinderin [Source:HGNC Symbol;Acc:21695]
157	ENSG00000006756	438.923	0.710363	0.177456	4.00305	6.25e-05	0.00138788	chrX	2822011	2847392	7030	-	48.88	p22.33	protein_coding	ARSD	arylsulfatase D [Source:HGNC Symbol;Acc:717]
158	ENSG00000006757	1491.41	-0.706271	0.202701	-3.48429	0.000493435	0.00667399	chrX	7866288	7895780	3441	-	40.45	p22.31	protein_coding	PNPLA4	patatin-like phospholipase domain containing 4 [Source:HGNC Symbol;Acc:24887]
159	ENSG00000006788	18055.6	-1.96789	0.680842	-2.89037	0.00384788	0.0296126	chr17	10201401	10276447	6347	-	45.69	p13.1	protein_coding	MYH13	myosin, heavy chain 13, skeletal muscle [Source:HGNC Symbol;Acc:7571]
160	ENSG00000006831	5038.16	-0.6322	0.231443	-2.73156	0.00630358	0.0421771	chr12	1797740	1897844	5878	+	39.4	p13.33	protein_coding	ADIPOR2	adiponectin receptor 2 [Source:HGNC Symbol;Acc:24041]
161	ENSG00000006837	2035.77	-0.0132547	0.149582	-0.0886121	0.92939	0.969619	chr5	133541305	133706738	3681	-	41.3	q31.1	protein_coding	CDKL3	cyclin-dependent kinase-like 3 [Source:HGNC Symbol;Acc:15483]
162	ENSG00000007001	4.38834	1.03768	0.716298	1.44868	0.147428	0.357393	chr2	158733214	158992666	2957	+	40.24	q24.1	protein_coding	UPP2	uridine phosphorylase 2 [Source:HGNC Symbol;Acc:23061]
163	ENSG00000007047	2528.58	-0.22949	0.317017	-0.723903	0.469125	0.699208	chr19	45582546	45808541	6668	+	53.57	q13.32	protein_coding	MARK4	MAP/microtubule affinity-regulating kinase 4 [Source:HGNC Symbol;Acc:13538]
164	ENSG00000007062	250.535	0.360303	0.379916	0.948376	0.342938	0.590544	chr4	15964699	16086001	7465	-	43.17	p15.32	protein_coding	PROM1	prominin 1 [Source:HGNC Symbol;Acc:9454]
165	ENSG00000007080	842.798	-0.53111	0.173085	-3.06849	0.00215146	0.0193498	chr19	18043825	18054800	1660	+	55.84	p13.11	protein_coding	CCDC124	coiled-coil domain containing 124 [Source:HGNC Symbol;Acc:25171]
166	ENSG00000007129	13.0406	0.656076	0.516597	1.27	0.204086	0.436384	chr19	42055886	42093197	1926	+	44.65	q13.2	protein_coding	CEACAM21	carcinoembryonic antigen-related cell adhesion molecule 21 [Source:HGNC Symbol;Acc:28834]
167	ENSG00000007168	19971.9	-0.208373	0.0966591	-2.15575	0.0311032	0.128852	chr17	2496504	2588909	8127	+	42.4	p13.3	protein_coding	PAFAH1B1	platelet-activating factor acetylhydrolase 1b, regulatory subunit 1 (45kDa) [Source:HGNC Symbol;Acc:8574]
168	ENSG00000007171	69.3019	0.185163	0.385418	0.480423	0.630927	0.810831	chr17	26083792	26127525	4176	-	51.36	q11.2	protein_coding	NOS2	nitric oxide synthase 2, inducible [Source:HGNC Symbol;Acc:7873]
169	ENSG00000007174	48.6614	0.0317867	0.339617	0.0935957	0.92543	0.968182	chr17	11501748	11873065	16980	+	42.63	p12	protein_coding	DNAH9	dynein, axonemal, heavy chain 9 [Source:HGNC Symbol;Acc:2953]
170	ENSG00000007202	16745.2	-0.254281	0.135612	-1.87507	0.060783	0.202267	chr17	26941458	26972472	9235	-	46.75	q11.2	protein_coding	KIAA0100	KIAA0100 [Source:HGNC Symbol;Acc:28960]
171	ENSG00000007237	4006.21	0.18735	0.250675	0.747383	0.454832	0.688139	chr17	9813926	10101868	10100	-	47.97	p13.1	protein_coding	GAS7	growth arrest-specific 7 [Source:HGNC Symbol;Acc:4169]
172	ENSG00000007255	542.264	0.533401	0.170419	3.12993	0.00174848	0.0166995	chr19	45666186	45681495	933	-	56.86	q13.32	protein_coding	TRAPPC6A	trafficking protein particle complex 6A [Source:HGNC Symbol;Acc:23069]
173	ENSG00000007264	34.4149	-0.103731	0.39431	-0.263069	0.792497	0.905203	chr19	3777971	3802127	4138	-	54.4	p13.3	protein_coding	MATK	megakaryocyte-associated tyrosine kinase [Source:HGNC Symbol;Acc:6906]
174	ENSG00000007312	124.161	-0.417868	0.237024	-1.76298	0.0779039	0.237942	chr17	62006100	62009714	2080	-	60.69	q23.3	protein_coding	CD79B	CD79b molecule, immunoglobulin-associated beta [Source:HGNC Symbol;Acc:1699]
175	ENSG00000007314	33164.3	-0.957882	0.27676	-3.46105	0.000538064	0.00713807	chr17	62015914	62050278	8247	-	56.1	q23.3	protein_coding	SCN4A	sodium channel, voltage-gated, type IV, alpha subunit [Source:HGNC Symbol;Acc:10591]
176	ENSG00000007341	2102	0.0384453	0.0954993	0.402572	0.687263	0.846533	chr1	113066140	113163447	8111	-	39.05	p13.2	protein_coding	ST7L	suppression of tumorigenicity 7 like [Source:HGNC Symbol;Acc:18441]
177	ENSG00000007350	22.5314	0.56101	0.4555	1.23164	0.218085	0.453725	chrX	153524024	153558700	3650	+	48.32	q28	protein_coding	TKTL1	transketolase-like 1 [Source:HGNC Symbol;Acc:11835]
178	ENSG00000007372	252.333	-0.123351	0.181993	-0.67778	0.497911	0.722303	chr11	31806340	31839509	14776	-	49.68	p13	protein_coding	PAX6	paired box 6 [Source:HGNC Symbol;Acc:8620]
179	ENSG00000007376	476.075	-0.159128	0.113545	-1.40144	0.161081	0.377625	chr16	834974	838397	2769	-	67.17	p13.3	protein_coding	RPUSD1	RNA pseudouridylate synthase domain containing 1 [Source:HGNC Symbol;Acc:14173]
180	ENSG00000007384	1553.05	0.0763929	0.194737	0.392288	0.694846	0.851085	chr16	108058	126354	5104	-	61.14	p13.3	protein_coding	RHBDF1	rhomboid 5 homolog 1 (Drosophila) [Source:HGNC Symbol;Acc:20561]
181	ENSG00000007392	3636.99	0.277029	0.165101	1.67793	0.0933601	0.266792	chr16	238968	279462	6176	-	47.33	p13.3	protein_coding	LUC7L	LUC7-like (S. cerevisiae) [Source:HGNC Symbol;Acc:6723]
182	ENSG00000007402	283.996	-0.336122	0.246737	-1.36227	0.173112	0.395268	chr3	50400233	50541675	6319	-	56.52	p21.31	protein_coding	CACNA2D2	calcium channel, voltage-dependent, alpha 2/delta subunit 2 [Source:HGNC Symbol;Acc:1400]
183	ENSG00000007516	771.137	-0.327067	0.132297	-2.47222	0.0134278	0.0725116	chr16	1383602	1399439	6143	+	65.72	p13.3	protein_coding	BAIAP3	BAI1-associated protein 3 [Source:HGNC Symbol;Acc:948]
184	ENSG00000007520	2023.53	-0.361303	0.100162	-3.6072	0.000309513	0.00466708	chr16	1399241	1401912	1243	-	62.57	p13.3	protein_coding	TSR3	TSR3, 20S rRNA accumulation, homolog (S. cerevisiae) [Source:HGNC Symbol;Acc:14175]
185	ENSG00000007541	1226.87	-0.41158	0.255087	-1.61349	0.106638	0.290333	chr16	616995	634136	6869	+	64.36	p13.3	protein_coding	PIGQ	phosphatidylinositol glycan anchor biosynthesis, class Q [Source:HGNC Symbol;Acc:14135]
186	ENSG00000007545	1875.78	0.00257759	0.0702566	0.0366882	0.970734	0.987002	chr16	1662326	1727909	8427	+	53.11	p13.3	protein_coding	CRAMP1L	Crm, cramped-like (Drosophila) [Source:HGNC Symbol;Acc:14122]
187	ENSG00000007866	1465.87	-0.421468	0.278536	-1.51315	0.130241	0.329846	chr6	35441374	35464853	3046	-	56.75	p21.31	protein_coding	TEAD3	TEA domain family member 3 [Source:HGNC Symbol;Acc:11716]
188	ENSG00000007908	58.0344	-0.643263	0.477908	-1.346	0.178303	0.401992	chr1	169691781	169733846	4586	-	39.36	q24.2	protein_coding	SELE	selectin E [Source:HGNC Symbol;Acc:10718]
189	ENSG00000007923	3555.5	-0.410962	0.12257	-3.35286	0.000799805	0.00951369	chr1	6694228	6761984	5147	-	46.6	p36.31	protein_coding	DNAJC11	DnaJ (Hsp40) homolog, subfamily C, member 11 [Source:HGNC Symbol;Acc:25570]
190	ENSG00000007933	356.056	-0.307763	0.302915	-1.01601	0.309627	0.557888	chr1	171060018	171086959	3463	+	36.5	q24.3	protein_coding	FMO3	flavin containing monooxygenase 3 [Source:HGNC Symbol;Acc:3771]
191	ENSG00000007944	4518.86	-0.693882	0.209082	-3.31871	0.000904344	0.0103192	chr6	16129356	16148479	3033	+	40.19	p22.3	protein_coding	MYLIP	myosin regulatory light chain interacting protein [Source:HGNC Symbol;Acc:21155]
192	ENSG00000007952	11.2254	0.582055	0.512581	1.13554	0.25615	0.498736	chrX	100098313	100129334	2529	-	41.14	q22.1	protein_coding	NOX1	NADPH oxidase 1 [Source:HGNC Symbol;Acc:7889]
193	ENSG00000007968	24.5323	-0.207014	0.445348	-0.464836	0.642049	0.818637	chr1	23832922	23857712	5457	-	51.66	p36.12	protein_coding	E2F2	E2F transcription factor 2 [Source:HGNC Symbol;Acc:3114]
194	ENSG00000008018	7525.17	-0.231256	0.0937352	-2.46713	0.0136203	0.0732153	chr6	170844205	170862429	2256	-	39.81	q27	protein_coding	PSMB1	proteasome (prosome, macropain) subunit, beta type, 1 [Source:HGNC Symbol;Acc:9537]
195	ENSG00000008056	138.552	-0.47147	0.185819	-2.53726	0.0111725	0.0636122	chrX	47431303	47479252	3203	-	47.76	p11.23	protein_coding	SYN1	synapsin I [Source:HGNC Symbol;Acc:11494]
196	ENSG00000008083	2368.17	-0.512065	0.188396	-2.71802	0.00656743	0.0434583	chr6	15246527	15522252	6490	+	43.92	p22.3	protein_coding	JARID2	jumonji, AT rich interactive domain 2 [Source:HGNC Symbol;Acc:6196]
197	ENSG00000008086	425.007	0.0628895	0.181042	0.347375	0.72831	0.870156	chrX	18443703	18671749	3576	+	40.21	p22.13	protein_coding	CDKL5	cyclin-dependent kinase-like 5 [Source:HGNC Symbol;Acc:11411]
198	ENSG00000008118	34.3247	-1.19956	0.42885	-2.79715	0.00515549	0.036527	chr1	209757062	209787283	2676	+	47.01	q32.2	protein_coding	CAMK1G	calcium/calmodulin-dependent protein kinase IG [Source:HGNC Symbol;Acc:14585]
199	ENSG00000008128	1911.25	-0.445825	0.136606	-3.26359	0.00110009	0.0119466	chr1	1634169	1655766	4707	-	51.99	p36.33	protein_coding	CDK11A	cyclin-dependent kinase 11A [Source:HGNC Symbol;Acc:1730]
200	ENSG00000008130	1762.45	0.00562142	0.111544	0.0503963	0.959807	0.982366	chr1	1682671	1711896	5637	-	53.7	p36.33	protein_coding	NADK	NAD kinase [Source:HGNC Symbol;Acc:29831]
201	ENSG00000008226	677.144	-0.0815471	0.159925	-0.509908	0.610116	0.798122	chr3	38080696	38165516	8338	+	48.5	p22.2	protein_coding	DLEC1	deleted in lung and esophageal cancer 1 [Source:HGNC Symbol;Acc:2899]
202	ENSG00000008256	2457.17	-0.442457	0.164972	-2.68202	0.00731794	0.0470218	chr7	6201407	6312275	5805	-	44.78	p22.1	protein_coding	CYTH3	cytohesin 3 [Source:HGNC Symbol;Acc:9504]
203	ENSG00000008277	789.949	0.535069	0.256474	2.08625	0.0369557	0.145231	chr7	87563458	87832204	12217	+	37.29	q21.12	protein_coding	ADAM22	ADAM metallopeptidase domain 22 [Source:HGNC Symbol;Acc:201]
204	ENSG00000008282	5609.23	-0.936793	0.159758	-5.86381	4.52e-09	4.93e-07	chr7	105730949	105753022	2794	-	38.18	q22.3	protein_coding	SYPL1	synaptophysin-like 1 [Source:HGNC Symbol;Acc:11507]
205	ENSG00000008283	458.799	0.201818	0.252492	0.799304	0.424114	0.663483	chr17	61509665	61523739	5320	-	57.41	q23.3	protein_coding	CYB561	cytochrome b561 [Source:HGNC Symbol;Acc:2571]
206	ENSG00000008294	25159.3	0.275572	0.104321	2.64158	0.00825205	0.0513033	chr17	49039535	49198226	11948	-	40	q21.33	protein_coding	SPAG9	sperm associated antigen 9 [Source:HGNC Symbol;Acc:14524]
207	ENSG00000008300	99.071	0.0968146	0.255251	0.379291	0.704471	0.85728	chr3	48673902	48700348	13888	-	59.89	p21.31	protein_coding	CELSR3	cadherin, EGF LAG seven-pass G-type receptor 3 [Source:HGNC Symbol;Acc:3230]
208	ENSG00000008311	1652.62	-0.193454	0.217596	-0.889052	0.373975	0.619443	chr7	121715701	121784334	4591	-	36.48	q31.32	protein_coding	AASS	aminoadipate-semialdehyde synthase [Source:HGNC Symbol;Acc:17366]
209	ENSG00000008323	138.838	-0.0254089	0.217261	-0.116951	0.906899	0.960083	chr12	6419602	6437672	4260	+	55.71	p13.31	protein_coding	PLEKHG6	pleckstrin homology domain containing, family G (with RhoGef domain) member 6 [Source:HGNC Symbol;Acc:25562]
210	ENSG00000008324	254.397	-0.120976	0.178465	-0.677868	0.497855	0.722252	chr3	42623332	42636606	1301	+	47.77	p22.1	protein_coding	SS18L2	synovial sarcoma translocation gene on chromosome 18-like 2 [Source:HGNC Symbol;Acc:15593]
211	ENSG00000008382	616.822	-0.525166	0.226783	-2.31572	0.0205736	0.0972974	chr19	4343524	4360083	2049	+	55.95	p13.3	protein_coding	MPND	MPN domain containing [Source:HGNC Symbol;Acc:25934]
212	ENSG00000008394	274.437	0.949266	0.538509	1.76277	0.0779397	0.237962	chr12	16500076	16762193	6213	+	36.94	p12.3	protein_coding	MGST1	microsomal glutathione S-transferase 1 [Source:HGNC Symbol;Acc:7061]
213	ENSG00000008405	1469.47	0.36672	0.247532	1.4815	0.138472	0.343346	chr12	107385142	107487607	5062	-	37.62	q23.3	protein_coding	CRY1	cryptochrome 1 (photolyase-like) [Source:HGNC Symbol;Acc:2384]
214	ENSG00000008438	15.8931	0.0331413	0.353795	0.0936735	0.925369	0.968155	chr19	46522411	46526323	720	-	57.73	q13.32	protein_coding	PGLYRP1	peptidoglycan recognition protein 1 [Source:HGNC Symbol;Acc:8904]
215	ENSG00000008441	22805.7	-0.591686	0.232636	-2.5434	0.0109778	0.0628316	chr19	13106422	13209610	6302	+	55.28	p13.2	protein_coding	NFIX	nuclear factor I/X (CCAAT-binding transcription factor) [Source:HGNC Symbol;Acc:7788]
216	ENSG00000008513	9576.53	-0.513744	0.261302	-1.96609	0.0492884	0.176846	chr8	134467091	134584183	8730	-	49.4	q24.22	protein_coding	ST3GAL1	ST3 beta-galactoside alpha-2,3-sialyltransferase 1 [Source:HGNC Symbol;Acc:10862]
217	ENSG00000008516	165.537	0.290503	0.221393	1.31216	0.189466	0.417141	chr16	3096682	3110727	4126	+	58.2	p13.3	protein_coding	MMP25	matrix metallopeptidase 25 [Source:HGNC Symbol;Acc:14246]
218	ENSG00000008517	6628.97	-0.0895202	0.349001	-0.256504	0.797562	0.908059	chr16	3115298	3131908	2924	+	53.24	p13.3	protein_coding	IL32	interleukin 32 [Source:HGNC Symbol;Acc:16830]
219	ENSG00000008710	33457	-0.377012	0.137165	-2.7486	0.00598509	0.0406286	chr16	2138711	2185899	18532	-	63.1	p13.3	protein_coding	PKD1	polycystic kidney disease 1 (autosomal dominant) [Source:HGNC Symbol;Acc:9008]
220	ENSG00000008735	43.2908	0.420217	0.417469	1.00658	0.314136	0.562176	chr22	51039114	51052409	6107	+	63.07	q13.33	protein_coding	MAPK8IP2	mitogen-activated protein kinase 8 interacting protein 2 [Source:HGNC Symbol;Acc:6883]
221	ENSG00000008838	5778.71	-0.373633	0.126795	-2.94675	0.00321134	0.0260033	chr17	38175350	38217468	6962	-	50.63	q21.1	protein_coding	MED24	mediator complex subunit 24 [Source:HGNC Symbol;Acc:22963]	MI0022731	hsa-mir-6884
222	ENSG00000008853	3254.68	-0.0763685	0.224355	-0.340392	0.733561	0.873088	chr8	22844930	22877712	6580	+	53.51	p21.3	protein_coding	RHOBTB2	Rho-related BTB domain containing 2 [Source:HGNC Symbol;Acc:18756]
223	ENSG00000008869	2939.99	0.142108	0.111738	1.27179	0.203446	0.43556	chr2	37195526	37311485	8206	-	38.59	p22.2	protein_coding	HEATR5B	HEAT repeat containing 5B [Source:HGNC Symbol;Acc:29273]
224	ENSG00000008952	5033.17	-0.14679	0.136056	-1.0789	0.280633	0.526002	chr3	169684423	169716161	7928	+	36.6	q26.2	protein_coding	SEC62	SEC62 homolog (S. cerevisiae) [Source:HGNC Symbol;Acc:11846]
225	ENSG00000008988	23895.3	-0.310561	0.162462	-1.91159	0.0559284	0.191996	chr8	56979854	56987069	2931	-	41.82	q12.1	protein_coding	RPS20	ribosomal protein S20 [Source:HGNC Symbol;Acc:10405]
226	ENSG00000009307	191355	-0.313441	0.154261	-2.03188	0.0421655	0.159151	chr1	115259534	115301297	5755	-	38.28	p13.2	protein_coding	CSDE1	cold shock domain containing E1, RNA-binding [Source:HGNC Symbol;Acc:29905]
227	ENSG00000009335	14148.4	-0.528578	0.156091	-3.38634	0.00070832	0.00873335	chr7	156931607	157062066	9218	+	42.12	q36.3	protein_coding	UBE3C	ubiquitin protein ligase E3C [Source:HGNC Symbol;Acc:16803]
228	ENSG00000009413	12291.9	0.434119	0.148012	2.933	0.00335702	0.0268756	chr6	111620234	111804918	12417	-	36.9	q21	protein_coding	REV3L	REV3-like, polymerase (DNA directed), zeta, catalytic subunit [Source:HGNC Symbol;Acc:9968]
229	ENSG00000009694	1012.16	0.68486	0.230846	2.96674	0.00300972	0.024896	chrX	123509753	124097666	12896	-	37.17	q25	protein_coding	TENM1	teneurin transmembrane protein 1 [Source:HGNC Symbol;Acc:8117]
230	ENSG00000009709	1149.36	0.557607	0.21479	2.59606	0.00943008	0.0563768	chr1	18957500	19075360	6313	+	52.35	p36.13	protein_coding	PAX7	paired box 7 [Source:HGNC Symbol;Acc:8621]
231	ENSG00000009724	808.463	-0.202296	0.216572	-0.934083	0.350261	0.597378	chr1	11086580	11107290	4251	-	50.21	p36.22	protein_coding	MASP2	mannan-binding lectin serine peptidase 2 [Source:HGNC Symbol;Acc:6902]
232	ENSG00000009765	15.0155	2.17836	0.839374	2.59522	0.00945303	0.056467	chr6	150690028	150727105	10362	+	41.6	q25.1	protein_coding	IYD	iodotyrosine deiodinase [Source:HGNC Symbol;Acc:21071]
233	ENSG00000009780	1539.04	-0.160293	0.179378	-0.893603	0.371534	0.617302	chr1	28052490	28089633	4034	+	43.35	p35.3	protein_coding	FAM76A	family with sequence similarity 76, member A [Source:HGNC Symbol;Acc:28530]
234	ENSG00000009790	405.273	0.147952	0.157204	0.941146	0.34663	0.594241	chr1	209929377	209955668	7753	+	45.61	q32.2	protein_coding	TRAF3IP3	TRAF3 interacting protein 3 [Source:HGNC Symbol;Acc:30766]
235	ENSG00000009830	1652.72	-0.185125	0.240546	-0.769601	0.441537	0.67809	chr14	77741299	77787227	10012	-	47.08	q24.3	protein_coding	POMT2	protein-O-mannosyltransferase 2 [Source:HGNC Symbol;Acc:19743]
236	ENSG00000009844	3932.17	-0.308574	0.105717	-2.91887	0.00351299	0.0277171	chr6	142468367	142545826	7194	+	35.51	q24.1	protein_coding	VTA1	vesicle (multivesicular body) trafficking 1 [Source:HGNC Symbol;Acc:20954]
237	ENSG00000009950	2624.21	-0.0453938	0.306243	-0.148228	0.882163	0.949463	chr7	73007524	73038873	4815	-	56.25	q11.23	protein_coding	MLXIPL	MLX interacting protein-like [Source:HGNC Symbol;Acc:12744]
238	ENSG00000009954	8834.92	-0.147482	0.119239	-1.23687	0.216137	0.45142	chr7	72854728	72936608	7053	-	43.19	q11.23	protein_coding	BAZ1B	bromodomain adjacent to zinc finger domain, 1B [Source:HGNC Symbol;Acc:961]
239	ENSG00000010017	4910.27	-0.10438	0.142807	-0.730916	0.46483	0.696384	chr6	13621730	13711796	3480	-	36.94	p23	protein_coding	RANBP9	RAN binding protein 9 [Source:HGNC Symbol;Acc:13727]
240	ENSG00000010072	1295.31	-0.20919	0.186938	-1.11904	0.263125	0.506322	chr1	231472850	231490769	5906	+	41.57	q42.2	protein_coding	SPRTN	SprT-like N-terminal domain [Source:HGNC Symbol;Acc:25356]
241	ENSG00000010165	1297.68	-0.246065	0.151303	-1.62631	0.103884	0.285831	chr1	171750788	171783163	3843	+	43.62	q24.3	protein_coding	METTL13	methyltransferase like 13 [Source:HGNC Symbol;Acc:24248]
242	ENSG00000010219	596.326	-0.0326846	0.118026	-0.276927	0.781837	0.8995	chr12	4671370	4723325	5911	+	42.83	p13.32	protein_coding	DYRK4	dual-specificity tyrosine-(Y)-phosphorylation regulated kinase 4 [Source:HGNC Symbol;Acc:3095]
243	ENSG00000010244	16900.9	0.0560078	0.113056	0.495399	0.620318	0.80432	chr17	30677136	30708905	15834	+	38.47	q11.2	protein_coding	ZNF207	zinc finger protein 207 [Source:HGNC Symbol;Acc:12998]
244	ENSG00000010256	24570.2	-0.486419	0.175016	-2.77929	0.00544785	0.0380883	chr3	48636435	48648409	3236	-	53.04	p21.31	protein_coding	UQCRC1	ubiquinol-cytochrome c reductase core protein I [Source:HGNC Symbol;Acc:12585]
245	ENSG00000010270	903.514	-0.215509	0.111494	-1.93292	0.0532456	0.186114	chr7	38217824	38270272	4348	+	38.4	p14.1	protein_coding	STARD3NL	STARD3 N-terminal like [Source:HGNC Symbol;Acc:19169]
246	ENSG00000010278	1290.72	-0.375274	0.238102	-1.5761	0.115002	0.304544	chr12	6308881	6347425	3218	+	51.04	p13.31	protein_coding	CD9	CD9 molecule [Source:HGNC Symbol;Acc:1709]
247	ENSG00000010282	12528.5	-0.480247	0.229881	-2.08911	0.0366977	0.14458	chr3	42734155	42744319	2891	-	56.48	p22.1	protein_coding	HHATL	hedgehog acyltransferase-like [Source:HGNC Symbol;Acc:13242]
248	ENSG00000010292	1734.12	-0.288305	0.126908	-2.27176	0.0231009	0.105339	chr12	6602522	6641121	6487	+	46.34	p13.31	protein_coding	NCAPD2	non-SMC condensin I complex, subunit D2 [Source:HGNC Symbol;Acc:24305]
249	ENSG00000010295	2809.09	0.640526	0.153274	4.17897	2.93e-05	0.00076733	chr12	6647541	6665239	5193	-	54.31	p13.31	protein_coding	IFFO1	intermediate filament family orphan 1 [Source:HGNC Symbol;Acc:24970]
250	ENSG00000010310	9.60925	-0.127127	0.604778	-0.210205	0.833508	0.92628	chr19	46171502	46186982	4736	+	54.94	q13.32	protein_coding	GIPR	gastric inhibitory polypeptide receptor [Source:HGNC Symbol;Acc:4271]
251	ENSG00000010318	430.053	-0.0953257	0.145745	-0.65406	0.513073	0.732638	chr3	52444673	52457657	3367	+	45.18	p21.1	protein_coding	PHF7	PHD finger protein 7 [Source:HGNC Symbol;Acc:18458]
252	ENSG00000010319	2346.9	0.135859	0.220349	0.616566	0.537521	0.750385	chr3	52467069	52479101	5011	-	59.63	p21.1	protein_coding	SEMA3G	sema domain, immunoglobulin domain (Ig), short basic domain, secreted, (semaphorin) 3G [Source:HGNC Symbol;Acc:30400]
253	ENSG00000010322	5224.54	0.337727	0.115326	2.92844	0.00340665	0.027122	chr3	52489134	52527087	9161	+	53.28	p21.1	protein_coding	NISCH	nischarin [Source:HGNC Symbol;Acc:18006]
254	ENSG00000010327	6408.61	0.776331	0.236585	3.28141	0.00103291	0.0113933	chr3	52529354	52558511	10588	+	60.65	p21.1	protein_coding	STAB1	stabilin 1 [Source:HGNC Symbol;Acc:18628]
255	ENSG00000010361	1302.34	-0.596675	0.12644	-4.71905	2.37e-06	0.000101729	chr19	50310126	50320633	2951	-	52.29	q13.33	protein_coding	FUZ	fuzzy planar cell polarity protein [Source:HGNC Symbol;Acc:26219]
256	ENSG00000010379	189.081	0.363314	0.357529	1.01618	0.309543	0.557818	chr12	329789	372039	4241	-	47.19	p13.33	protein_coding	SLC6A13	solute carrier family 6 (neurotransmitter transporter), member 13 [Source:HGNC Symbol;Acc:11046]
257	ENSG00000010404	5888.88	-0.110509	0.0984481	-1.12251	0.261646	0.504529	chrX	148558521	148615470	10496	-	45.94	q28	protein_coding	IDS	iduronate 2-sulfatase [Source:HGNC Symbol;Acc:5389]
258	ENSG00000010438	8.71407	0.795368	0.564112	1.40995	0.158555	0.373894	chr9	33750515	33799230	1614	+	42.82	p13.3	protein_coding	PRSS3	protease, serine, 3 [Source:HGNC Symbol;Acc:9486]
259	ENSG00000010539	508.015	0.375892	0.127708	2.94338	0.00324653	0.0261908	chr16	3272325	3286221	7498	-	43.66	p13.3	protein_coding	ZNF200	zinc finger protein 200 [Source:HGNC Symbol;Acc:12993]
260	ENSG00000010610	417.418	0.887375	0.273603	3.24329	0.00118157	0.0126032	chr12	6896024	6929974	4583	+	48.56	p13.31	protein_coding	CD4	CD4 molecule [Source:HGNC Symbol;Acc:1678]
261	ENSG00000010626	444.164	-0.324236	0.205431	-1.57832	0.114491	0.303496	chr12	6982733	7023407	3054	+	47.35	p13.31	protein_coding	LRRC23	leucine rich repeat containing 23 [Source:HGNC Symbol;Acc:19138]
262	ENSG00000010671	124.442	0.620058	0.198104	3.12996	0.0017483	0.0166995	chrX	100604435	100641183	4227	-	42.94	q22.1	protein_coding	BTK	Bruton agammaglobulinemia tyrosine kinase [Source:HGNC Symbol;Acc:1133]
263	ENSG00000010704	419.382	-0.105214	0.139463	-0.754428	0.450592	0.685469	chr6	26087509	26098571	5675	+	44.85	p22.2	protein_coding	HFE	hemochromatosis [Source:HGNC Symbol;Acc:4886]
264	ENSG00000010803	3264.93	-0.269737	0.135676	-1.98809	0.0468019	0.170498	chr1	41492872	41707826	4447	-	39.5	p34.2	protein_coding	SCMH1	sex comb on midleg homolog 1 (Drosophila) [Source:HGNC Symbol;Acc:19003]
265	ENSG00000010810	1453.56	0.303081	0.223148	1.35821	0.174398	0.396894	chr6	111981535	112194655	7411	-	42.42	q21	protein_coding	FYN	FYN oncogene related to SRC, FGR, YES [Source:HGNC Symbol;Acc:4037]
266	ENSG00000010818	12740.8	-0.448448	0.16022	-2.79895	0.00512698	0.0363751	chr6	143072604	143266338	9774	-	38.32	q24.2	protein_coding	HIVEP2	human immunodeficiency virus type I enhancer binding protein 2 [Source:HGNC Symbol;Acc:4921]
267	ENSG00000010932	34.7093	1.45242	0.499345	2.90864	0.00363	0.0283852	chr1	171217638	171255117	3574	+	40.92	q24.3	protein_coding	FMO1	flavin containing monooxygenase 1 [Source:HGNC Symbol;Acc:3769]
268	ENSG00000011007	5527.95	-0.306867	0.150126	-2.04406	0.0409479	0.156078	chr1	24069645	24088549	5391	+	45.7	p36.11	protein_coding	TCEB3	transcription elongation factor B (SIII), polypeptide 3 (110kDa, elongin A) [Source:HGNC Symbol;Acc:11620]
269	ENSG00000011009	1158.84	-0.208236	0.130742	-1.59272	0.111222	0.298134	chr1	24117460	24122029	2196	+	62.39	p36.11	protein_coding	LYPLA2	lysophospholipase II [Source:HGNC Symbol;Acc:6738]
270	ENSG00000011021	1574.57	-0.207903	0.110723	-1.87769	0.0604235	0.201565	chr1	11866207	11903201	6884	+	47.77	p36.22	protein_coding	CLCN6	chloride channel, voltage-sensitive 6 [Source:HGNC Symbol;Acc:2024]
271	ENSG00000011028	6212.26	0.40281	0.399565	1.00812	0.313397	0.561417	chr17	60704762	60770958	6860	+	52.24	q23.2	protein_coding	MRC2	mannose receptor, C type 2 [Source:HGNC Symbol;Acc:16875]
272	ENSG00000011052	6892.94	0.086729	0.149641	0.579581	0.562197	0.767559	chr17	49230951	49249105	1241	+	48.86	q21.33	protein_coding	NME2	NME/NM23 nucleoside diphosphate kinase 2 [Source:HGNC Symbol;Acc:7850]
273	ENSG00000011083	696.016	-0.55669	0.249084	-2.23495	0.0254209	0.112298	chr5	149569520	149602351	4391	+	54.69	q32	protein_coding	SLC6A7	solute carrier family 6 (neurotransmitter transporter), member 7 [Source:HGNC Symbol;Acc:11054]
274	ENSG00000011105	2789.13	0.631267	0.169052	3.73416	0.000188344	0.00322524	chr12	3186521	3395730	5714	+	52.13	p13.33	protein_coding	TSPAN9	tetraspanin 9 [Source:HGNC Symbol;Acc:21640]
275	ENSG00000011114	3635.11	0.0171179	0.0969224	0.176615	0.859811	0.938569	chr14	93703896	93799438	11333	-	40.08	q32.12	protein_coding	BTBD7	BTB (POZ) domain containing 7 [Source:HGNC Symbol;Acc:18269]
276	ENSG00000011132	988.315	0.0348557	0.139883	0.249178	0.803223	0.911017	chr19	3750817	3761697	5556	-	56.64	p13.3	protein_coding	APBA3	amyloid beta (A4) precursor protein-binding, family A, member 3 [Source:HGNC Symbol;Acc:580]
277	ENSG00000011143	672.774	0.145235	0.139123	1.04393	0.296519	0.543446	chr17	56282803	56296966	4073	-	47.46	q22	protein_coding	MKS1	Meckel syndrome, type 1 [Source:HGNC Symbol;Acc:7121]
278	ENSG00000011198	1169.56	-0.0105259	0.147498	-0.0713631	0.943109	0.975674	chr3	43731605	43775863	3172	+	40.26	p21.33	protein_coding	ABHD5	abhydrolase domain containing 5 [Source:HGNC Symbol;Acc:21396]
279	ENSG00000011201	3516.1	-0.289753	0.188654	-1.5359	0.124563	0.320706	chrX	8496915	8700227	7131	-	39.59	p22.31	protein_coding	KAL1	Kallmann syndrome 1 sequence [Source:HGNC Symbol;Acc:6211]
280	ENSG00000011243	4537.32	-0.17061	0.113628	-1.50147	0.133234	0.334718	chr19	15490859	15529952	5081	-	48.86	p13.12	protein_coding	AKAP8L	A kinase (PRKA) anchor protein 8-like [Source:HGNC Symbol;Acc:29857]
281	ENSG00000011258	2049.12	-0.126914	0.10267	-1.23613	0.216409	0.451858	chr17	49254786	49337524	7201	-	39.5	q21.33	protein_coding	MBTD1	mbt domain containing 1 [Source:HGNC Symbol;Acc:19866]
282	ENSG00000011260	1242.41	-0.187271	0.148098	-1.2645	0.206049	0.438815	chr17	49337889	49375297	2721	+	40.38	q21.33	protein_coding	UTP18	UTP18 small subunit (SSU) processome component homolog (yeast) [Source:HGNC Symbol;Acc:24274]
283	ENSG00000011275	4967.16	-0.427872	0.126888	-3.37204	0.000746148	0.00905894	chr7	5659678	5821370	7619	-	45.52	p22.1	protein_coding	RNF216	ring finger protein 216 [Source:HGNC Symbol;Acc:21698]
284	ENSG00000011295	3455.49	-0.0103011	0.0894632	-0.115144	0.908331	0.960751	chr17	15902694	15948329	5966	+	41.07	p12	protein_coding	TTC19	tetratricopeptide repeat domain 19 [Source:HGNC Symbol;Acc:26006]
285	ENSG00000011304	2398.84	-0.00562966	0.115801	-0.0486149	0.961226	0.982746	chr19	797075	812327	6969	+	61.17	p13.3	protein_coding	PTBP1	polypyrimidine tract binding protein 1 [Source:HGNC Symbol;Acc:9583]	MI0017384	hsa-mir-4745
286	ENSG00000011332	8.06854	1.34449	0.634276	2.11972	0.0340299	0.137116	chr19	38701646	38720354	4800	-	57.15	q13.2	protein_coding	DPF1	D4, zinc and double PHD fingers family 1 [Source:HGNC Symbol;Acc:20225]
287	ENSG00000011347	327.353	-0.0784779	0.269261	-0.291456	0.770702	0.893569	chr11	61282785	61348620	5953	-	57.15	q12.2	protein_coding	SYT7	synaptotagmin VII [Source:HGNC Symbol;Acc:11514]
288	ENSG00000011376	2049.6	-0.274581	0.1094	-2.50987	0.0120774	0.0672018	chr3	45429998	45590913	5393	+	42.15	p21.31	protein_coding	LARS2	leucyl-tRNA synthetase 2, mitochondrial [Source:HGNC Symbol;Acc:17095]
289	ENSG00000011405	4722.13	-0.0438585	0.0894904	-0.490092	0.624069	0.806681	chr11	17099277	17229530	9204	-	39.84	p15.1	protein_coding	PIK3C2A	phosphatidylinositol-4-phosphate 3-kinase, catalytic subunit type 2 alpha [Source:HGNC Symbol;Acc:8971]
290	ENSG00000011422	99.7564	0.205417	0.351639	0.584171	0.559105	0.765856	chr19	44150247	44174699	4457	-	49.94	q13.31	protein_coding	PLAUR	plasminogen activator, urokinase receptor [Source:HGNC Symbol;Acc:9053]
291	ENSG00000011426	89.2931	0.818078	0.562711	1.45382	0.145997	0.355199	chr7	36429415	36493400	6012	+	37.88	p14.2	protein_coding	ANLN	anillin, actin binding protein [Source:HGNC Symbol;Acc:14082]
292	ENSG00000011451	1624.44	-0.600468	0.195266	-3.07513	0.00210413	0.0190254	chr19	15532319	15560762	8155	-	58.71	p13.12	protein_coding	WIZ	widely interspaced zinc finger motifs [Source:HGNC Symbol;Acc:30917]	MI0007075	hsa-mir-1470
293	ENSG00000011454	7131.83	-0.0807136	0.126365	-0.638734	0.522996	0.740097	chr9	125703112	125867145	8181	+	38.49	q33.2	protein_coding	RABGAP1	RAB GTPase activating protein 1 [Source:HGNC Symbol;Acc:17155]
294	ENSG00000011465	35864.3	0.35327	0.254387	1.38871	0.164921	0.383426	chr12	91539025	91576900	8083	-	34.59	q21.33	protein_coding	DCN	decorin [Source:HGNC Symbol;Acc:2705]
295	ENSG00000011478	90.3908	-0.0271217	0.220046	-0.123255	0.901905	0.958003	chr19	46195741	46207247	2396	+	52.56	q13.32	protein_coding	QPCTL	glutaminyl-peptide cyclotransferase-like [Source:HGNC Symbol;Acc:25952]
296	ENSG00000011485	2398.71	-0.141984	0.123197	-1.1525	0.249118	0.490933	chr19	46850251	46896238	7059	+	50.75	q13.32	protein_coding	PPP5C	protein phosphatase 5, catalytic subunit [Source:HGNC Symbol;Acc:9322]
297	ENSG00000011523	8709.62	0.183837	0.1254	1.46601	0.142645	0.350193	chr2	65283500	65314138	8623	+	47.81	p14	protein_coding	CEP68	centrosomal protein 68kDa [Source:HGNC Symbol;Acc:29076]
298	ENSG00000011566	7641.53	0.0239431	0.136978	0.174795	0.861241	0.939296	chr2	39476407	39664453	6067	-	36.9	p22.1	protein_coding	MAP4K3	mitogen-activated protein kinase kinase kinase kinase 3 [Source:HGNC Symbol;Acc:6865]
299	ENSG00000011590	193.209	0.387622	0.324348	1.19508	0.232056	0.470469	chr19	36195429	36207940	2770	+	52.49	q13.12	protein_coding	ZBTB32	zinc finger and BTB domain containing 32 [Source:HGNC Symbol;Acc:16763]
300	ENSG00000011600	167.009	0.922508	0.249751	3.6937	0.00022101	0.00362917	chr19	36395303	36399197	907	-	51.45	q13.12	protein_coding	TYROBP	TYRO protein tyrosine kinase binding protein [Source:HGNC Symbol;Acc:12449]
301	ENSG00000011638	5017.37	-0.926047	0.478484	-1.93538	0.052944	0.185348	chr16	21169698	21191937	2558	+	43.7	p12.3	protein_coding	TMEM159	transmembrane protein 159 [Source:HGNC Symbol;Acc:30136]
302	ENSG00000012048	919.272	-0.299322	0.133585	-2.24069	0.0250461	0.111179	chr17	41196312	41277500	8278	-	42.93	q21.31	protein_coding	BRCA1	breast cancer 1, early onset [Source:HGNC Symbol;Acc:1100]
303	ENSG00000012061	3187.03	-0.0653288	0.131413	-0.497127	0.619099	0.803786	chr19	45910591	45982086	5576	-	52.1	q13.32	protein_coding	ERCC1	excision repair cross-complementing rodent repair deficiency, complementation group 1 (includes overlapping antisense sequence) [Source:HGNC Symbol;Acc:3433]
304	ENSG00000012124	43.2109	-0.466883	0.395536	-1.18038	0.237849	0.477184	chr19	35810164	35838258	5839	+	50.24	q13.12	protein_coding	CD22	CD22 molecule [Source:HGNC Symbol;Acc:1643]
305	ENSG00000012171	804.322	-0.145115	0.291695	-0.49749	0.618844	0.803612	chr3	50304990	50314977	5767	+	60.7	p21.31	processed_transcript	SEMA3B	sema domain, immunoglobulin domain (Ig), short basic domain, secreted, (semaphorin) 3B [Source:HGNC Symbol;Acc:10724]	MI0022719	hsa-mir-6872
306	ENSG00000012174	2243.09	0.179521	0.101554	1.76775	0.0771029	0.236398	chrX	21857754	21903542	8927	+	38.49	p22.12	protein_coding	MBTPS2	membrane-bound transcription factor peptidase, site 2 [Source:HGNC Symbol;Acc:15455]
307	ENSG00000012211	1057.5	-0.223584	0.151302	-1.47773	0.13948	0.344824	chrX	49031151	49042845	3396	-	55.15	p11.23	protein_coding	PRICKLE3	prickle homolog 3 (Drosophila) [Source:HGNC Symbol;Acc:6645]
308	ENSG00000012223	241.214	-0.0398217	0.290963	-0.136862	0.89114	0.953603	chr3	46477136	46526724	4247	-	46.95	p21.31	protein_coding	LTF	lactotransferrin [Source:HGNC Symbol;Acc:6720]
309	ENSG00000012232	4075.29	-0.831532	0.196657	-4.22834	2.35e-05	0.000646069	chr8	28457986	28613116	13220	+	44.36	p21.1	protein_coding	EXTL3	exostosin-like glycosyltransferase 3 [Source:HGNC Symbol;Acc:3518]
310	ENSG00000012660	1044.33	0.165814	0.191993	0.863644	0.387784	0.631889	chr6	53132196	53213947	4223	-	41.88	p12.1	protein_coding	ELOVL5	ELOVL fatty acid elongase 5 [Source:HGNC Symbol;Acc:21308]
311	ENSG00000012779	200.13	0.0553482	0.218624	0.253167	0.800139	0.909411	chr10	45869661	45941561	3685	+	47.72	q11.21	protein_coding	ALOX5	arachidonate 5-lipoxygenase [Source:HGNC Symbol;Acc:435]
312	ENSG00000012817	5579.55	-0.767195	1.73871	-0.441245	0.659036	0.829078	chrY	21865751	21906825	9463	-	38.66	q11.222	protein_coding	KDM5D	lysine (K)-specific demethylase 5D [Source:HGNC Symbol;Acc:11115]
313	ENSG00000012822	12797.8	-0.320457	0.114038	-2.8101	0.00495255	0.0354875	chr12	54104903	54121529	6296	-	49.38	q13.13	protein_coding	CALCOCO1	calcium binding and coiled-coil domain 1 [Source:HGNC Symbol;Acc:29306]
314	ENSG00000012963	1997.04	0.158656	0.117647	1.34858	0.177473	0.400774	chr14	93673401	93695561	3694	+	43.3	q32.12	protein_coding	UBR7	ubiquitin protein ligase E3 component n-recognin 7 (putative) [Source:HGNC Symbol;Acc:20344]
315	ENSG00000012983	2481.98	0.0522883	0.126154	0.41448	0.678522	0.840812	chr14	50885219	51027844	7620	-	37.27	q22.1	protein_coding	MAP4K5	mitogen-activated protein kinase kinase kinase kinase 5 [Source:HGNC Symbol;Acc:6867]
316	ENSG00000013016	465.566	-0.272098	0.24545	-1.10857	0.267616	0.511323	chr2	31456880	31492313	4959	+	50.32	p23.1	protein_coding	EHD3	EH-domain containing 3 [Source:HGNC Symbol;Acc:3244]
317	ENSG00000013275	3688.05	0.0324171	0.114792	0.282398	0.777639	0.897049	chr19	40476912	40487348	2387	+	50.25	q13.2	protein_coding	PSMC4	proteasome (prosome, macropain) 26S subunit, ATPase, 4 [Source:HGNC Symbol;Acc:9551]
318	ENSG00000013288	1225.74	-0.159507	0.154682	-1.03119	0.302453	0.54992	chr4	6576902	6625089	8898	+	54.58	p16.1	protein_coding	MAN2B2	mannosidase, alpha, class 2B, member 2 [Source:HGNC Symbol;Acc:29623]
319	ENSG00000013293	50.7892	1.32838	0.548128	2.42349	0.0153721	0.0797374	chr3	170177372	170303863	10459	-	42.15	q26.2	protein_coding	SLC7A14	solute carrier family 7, member 14 [Source:HGNC Symbol;Acc:29326]
320	ENSG00000013297	183.996	0.89161	0.389355	2.28997	0.0220233	0.101858	chr3	170136653	170578169	6032	+	41.54	q26.2	protein_coding	CLDN11	claudin 11 [Source:HGNC Symbol;Acc:8514]
321	ENSG00000013306	1973.42	-0.110052	0.118068	-0.932107	0.351281	0.598465	chr17	42396993	42402238	3526	-	61.11	q21.31	protein_coding	SLC25A39	solute carrier family 25, member 39 [Source:HGNC Symbol;Acc:24279]
322	ENSG00000013364	3635.02	0.254669	0.164236	1.55063	0.120992	0.314503	chr16	29831715	29859355	6136	+	52.54	p11.2	protein_coding	MVP	major vault protein [Source:HGNC Symbol;Acc:7531]
323	ENSG00000013374	4180.3	-0.129345	0.109121	-1.18534	0.235884	0.474756	chr7	151038785	151075535	5411	+	44.96	q36.1	protein_coding	NUB1	negative regulator of ubiquitin-like proteins 1 [Source:HGNC Symbol;Acc:17623]
324	ENSG00000013375	2306.95	0.300687	0.114828	2.61858	0.00882959	0.0537697	chr6	83870869	83903655	7331	-	38.66	q14.2	protein_coding	PGM3	phosphoglucomutase 3 [Source:HGNC Symbol;Acc:8907]
325	ENSG00000013392	379.336	0.059623	0.11418	0.522184	0.601542	0.79256	chr6	83903098	83908651	4686	+	44.76	q14.2	protein_coding	RWDD2A	RWD domain containing 2A [Source:HGNC Symbol;Acc:21385]
326	ENSG00000013441	11319.4	-0.0253616	0.164243	-0.154415	0.877283	0.946896	chr2	201717732	201729422	5125	-	41.72	q33.1	protein_coding	CLK1	CDC-like kinase 1 [Source:HGNC Symbol;Acc:2068]
327	ENSG00000013503	1396.68	0.160214	0.118441	1.35269	0.176155	0.399146	chr12	106751436	106903976	4858	+	39.75	q23.3	protein_coding	POLR3B	polymerase (RNA) III (DNA directed) polypeptide B [Source:HGNC Symbol;Acc:30348]
328	ENSG00000013523	1697.33	-0.0325261	0.0956147	-0.340179	0.733722	0.873176	chr14	77253588	77292589	5347	-	44.37	q24.3	protein_coding	ANGEL1	angel homolog 1 (Drosophila) [Source:HGNC Symbol;Acc:19961]
329	ENSG00000013561	4166.98	-0.0170889	0.119882	-0.142548	0.886647	0.951389	chr5	141337893	141369856	4834	+	42.04	q31.3	protein_coding	RNF14	ring finger protein 14 [Source:HGNC Symbol;Acc:10058]
330	ENSG00000013563	8666.72	-0.13359	0.217099	-0.615344	0.538327	0.750989	chrX	153629579	153640449	4130	-	54.53	q28	protein_coding	DNASE1L1	deoxyribonuclease I-like 1 [Source:HGNC Symbol;Acc:2957]
331	ENSG00000013573	1883.21	-0.535437	0.436722	-1.22604	0.220185	0.45595	chr12	31226779	31257725	8374	+	52.28	p11.21	protein_coding	DDX11	DEAD/H (Asp-Glu-Ala-Asp/His) box helicase 11 [Source:HGNC Symbol;Acc:2736]
332	ENSG00000013583	504.933	-0.351684	0.181284	-1.93996	0.0523843	0.184087	chr12	13127798	13153207	3442	-	43.52	p13.1	protein_coding	HEBP1	heme binding protein 1 [Source:HGNC Symbol;Acc:17176]
333	ENSG00000013588	69.5847	-0.313355	0.422419	-0.741811	0.458202	0.690681	chr12	13043716	13070871	8440	+	46.77	p13.1	protein_coding	GPRC5A	G protein-coupled receptor, family C, group 5, member A [Source:HGNC Symbol;Acc:9836]	MI0003627	hsa-mir-614
334	ENSG00000013619	407.122	-0.884968	0.221822	-3.98954	6.62e-05	0.00145054	chrX	149529689	149682448	5958	+	44.07	q28	protein_coding	MAMLD1	mastermind-like domain containing 1 [Source:HGNC Symbol;Acc:2568]
335	ENSG00000013725	68.3593	-0.129849	0.3472	-0.373989	0.708412	0.859591	chr11	60739115	60787849	5995	+	49.93	q12.2	protein_coding	CD6	CD6 molecule [Source:HGNC Symbol;Acc:1691]
336	ENSG00000013810	303.242	-0.307068	0.189875	-1.61721	0.105832	0.289004	chr4	1723227	1746898	4682	+	56.08	p16.3	protein_coding	TACC3	transforming, acidic coiled-coil containing protein 3 [Source:HGNC Symbol;Acc:11524]
337	ENSG00000014123	4497.89	0.062604	0.114291	0.547759	0.583857	0.781276	chr6	96969471	97003152	4539	+	33.38	q16.1	protein_coding	UFL1	UFM1-specific ligase 1 [Source:HGNC Symbol;Acc:23039]
338	ENSG00000014138	591.984	-0.136803	0.131637	-1.03925	0.298689	0.545971	chr11	65029233	65073060	5726	+	47.9	q13.1	protein_coding	POLA2	polymerase (DNA directed), alpha 2, accessory subunit [Source:HGNC Symbol;Acc:30073]
339	ENSG00000014164	981.415	-0.462088	0.185136	-2.49593	0.0125626	0.0691669	chr8	144519825	144623623	3731	-	58.38	q24.3	protein_coding	ZC3H3	zinc finger CCCH-type containing 3 [Source:HGNC Symbol;Acc:28972]
340	ENSG00000014216	5112.57	-0.401232	0.137049	-2.92764	0.00341543	0.0271739	chr11	64948037	64979477	7553	+	51.18	q13.1	protein_coding	CAPN1	calpain 1, (mu/I) large subunit [Source:HGNC Symbol;Acc:1476]
341	ENSG00000014257	35.0714	0.52518	0.388811	1.35073	0.176781	0.399817	chr3	132036211	132087142	4193	+	40.4	q22.1	protein_coding	ACPP	acid phosphatase, prostate [Source:HGNC Symbol;Acc:125]
342	ENSG00000014641	22725.4	-0.429119	0.201831	-2.12613	0.0334922	0.135528	chr2	63815743	63834331	4993	+	38.05	p15	protein_coding	MDH1	malate dehydrogenase 1, NAD (soluble) [Source:HGNC Symbol;Acc:6970]
343	ENSG00000014824	6596.2	-0.113556	0.118256	-0.960252	0.336929	0.584673	chr4	41992489	42092474	7225	+	36.98	p13	protein_coding	SLC30A9	solute carrier family 30 (zinc transporter), member 9 [Source:HGNC Symbol;Acc:1329]
344	ENSG00000014914	306.718	0.0803181	0.214667	0.374152	0.708291	0.859544	chr1	149900543	149908791	4591	-	50.02	q21.2	protein_coding	MTMR11	myotubularin related protein 11 [Source:HGNC Symbol;Acc:24307]
345	ENSG00000014919	5328.55	0.261915	0.194755	1.34484	0.178677	0.40252	chr10	101471601	101491857	4177	-	42.42	q24.2	protein_coding	COX15	cytochrome c oxidase assembly homolog 15 (yeast) [Source:HGNC Symbol;Acc:2263]
346	ENSG00000015133	674.544	-0.0261736	0.246428	-0.106212	0.915414	0.963822	chr14	91737667	91884188	12426	-	51.25	q32.11	protein_coding	CCDC88C	coiled-coil domain containing 88C [Source:HGNC Symbol;Acc:19967]
347	ENSG00000015153	3806.46	0.144362	0.202313	0.713559	0.4755	0.704826	chr12	42550906	42632151	10840	-	39.02	q12	protein_coding	YAF2	YY1 associated factor 2 [Source:HGNC Symbol;Acc:17363]
348	ENSG00000015171	8559.15	0.0415938	0.0896744	0.463831	0.642769	0.819014	chr10	180405	300577	5300	+	37.8	p15.3	protein_coding	ZMYND11	zinc finger, MYND-type containing 11 [Source:HGNC Symbol;Acc:16966]
349	ENSG00000015285	90.1357	0.213995	0.243704	0.878095	0.379892	0.624927	chrX	48534985	48549818	2381	+	50.83	p11.23	protein_coding	WAS	Wiskott-Aldrich syndrome [Source:HGNC Symbol;Acc:12731]
350	ENSG00000015475	1265.1	0.353298	0.200416	1.76282	0.0779308	0.237962	chr22	18216906	18257536	4418	-	52.51	q11.21	protein_coding	BID	BH3 interacting domain death agonist [Source:HGNC Symbol;Acc:1050]
351	ENSG00000015479	26647.1	0.139132	0.0936365	1.48587	0.137313	0.341251	chr5	138609441	138667360	14669	+	40.63	q31.2	protein_coding	MATR3	matrin 3 [Source:HGNC Symbol;Acc:6912]
352	ENSG00000015520	27.6223	-1.18993	0.477567	-2.49165	0.012715	0.0697879	chr7	44552134	44580914	5252	-	51.5	p13	protein_coding	NPC1L1	NPC1-like 1 [Source:HGNC Symbol;Acc:7898]
353	ENSG00000015532	1599.06	0.0186835	0.144193	0.129572	0.896905	0.955573	chr17	48423453	48440499	5472	+	56.54	q21.33	protein_coding	XYLT2	xylosyltransferase II [Source:HGNC Symbol;Acc:15517]
354	ENSG00000015568	14185.2	0.0395777	0.145905	0.271257	0.786194	0.902009	chr2	110550335	110615272	14175	+	39.34	q13	protein_coding	RGPD5	RANBP2-like and GRIP domain containing 5 [Source:HGNC Symbol;Acc:32418]
355	ENSG00000015592	6.93768	2.22188	0.638532	3.47967	0.000502039	0.00676492	chr8	27092840	27115937	3294	-	48.03	p21.2	protein_coding	STMN4	stathmin-like 4 [Source:HGNC Symbol;Acc:16078]
356	ENSG00000015676	9460.01	-0.272181	0.128131	-2.12424	0.03365	0.135983	chr7	44418720	44530479	10113	-	44.52	p13	protein_coding	NUDCD3	NudC domain containing 3 [Source:HGNC Symbol;Acc:22208]
357	ENSG00000016082	10.4308	4.49991	1.22323	3.67872	0.000234406	0.00378691	chr5	50678921	50690564	3216	+	44.97	q11.1	protein_coding	ISL1	ISL LIM homeobox 1 [Source:HGNC Symbol;Acc:6132]
358	ENSG00000016391	632.752	-0.553193	0.258377	-2.14103	0.0322713	0.132333	chr3	53846362	53880417	7758	-	49.32	p21.1	protein_coding	CHDH	choline dehydrogenase [Source:HGNC Symbol;Acc:24288]
359	ENSG00000016402	97.4374	-0.303159	0.487844	-0.621425	0.53432	0.748118	chr6	137321108	137366298	4673	-	41.2	q23.3	protein_coding	IL20RA	interleukin 20 receptor, alpha [Source:HGNC Symbol;Acc:6003]
360	ENSG00000016602	10.114	-0.765067	0.58837	-1.30032	0.193493	0.422702	chr1	87012761	87046437	3649	+	37.99	p22.3	protein_coding	CLCA4	chloride channel accessory 4 [Source:HGNC Symbol;Acc:2018]
361	ENSG00000016864	1376.3	0.0632553	0.0978861	0.646213	0.518141	0.736057	chr3	52728505	52740048	3783	-	44.49	p21.1	protein_coding	GLT8D1	glycosyltransferase 8 domain containing 1 [Source:HGNC Symbol;Acc:24870]
362	ENSG00000017260	6232.02	-0.589403	0.140545	-4.19369	2.74e-05	0.000726589	chr3	130569439	130735556	8533	+	37.56	q22.1	protein_coding	ATP2C1	ATPase, Ca++ transporting, type 2C, member 1 [Source:HGNC Symbol;Acc:13211]
363	ENSG00000017373	15.2126	0.294884	0.370307	0.796321	0.425845	0.66515	chr17	36686251	36762183	11025	-	56.67	q12	protein_coding	SRCIN1	SRC kinase signaling inhibitor 1 [Source:HGNC Symbol;Acc:29506]
364	ENSG00000017427	3092.36	0.575446	0.301986	1.90554	0.05671	0.193845	chr12	102789645	102874423	8087	-	39.66	q23.2	protein_coding	IGF1	insulin-like growth factor 1 (somatomedin C) [Source:HGNC Symbol;Acc:5464]
365	ENSG00000017483	29.456	-0.345523	0.351918	-0.981827	0.326185	0.574368	chrX	48316920	48328644	4016	-	54.89	p11.23	protein_coding	SLC38A5	solute carrier family 38, member 5 [Source:HGNC Symbol;Acc:18070]
366	ENSG00000017621	159.483	-0.166101	0.196876	-0.843682	0.398847	0.64173	chrX	49019061	49024822	4948	+	58.99	p11.23	protein_coding	MAGIX	MAGI family member, X-linked [Source:HGNC Symbol;Acc:30006]
367	ENSG00000017797	4903.83	-0.263055	0.111101	-2.36771	0.0178987	0.0882646	chr18	9475007	9538114	4979	+	41.38	p11.22	protein_coding	RALBP1	ralA binding protein 1 [Source:HGNC Symbol;Acc:9841]
368	ENSG00000018189	5410.18	0.420539	0.137651	3.05511	0.00224978	0.0200056	chr4	71569921	71673032	8070	+	39.91	q13.3	protein_coding	RUFY3	RUN and FYVE domain containing 3 [Source:HGNC Symbol;Acc:30285]
369	ENSG00000018236	289.724	0.389753	0.384529	1.01359	0.31078	0.559159	chr12	41086244	41466220	7492	+	35.21	q12	protein_coding	CNTN1	contactin 1 [Source:HGNC Symbol;Acc:2171]
370	ENSG00000018280	147.753	-0.303606	0.321188	-0.945261	0.344526	0.5922	chr2	219246752	219261617	8676	+	55.34	q35	protein_coding	SLC11A1	solute carrier family 11 (proton-coupled divalent metal ion transporter), member 1 [Source:HGNC Symbol;Acc:10907]
371	ENSG00000018408	2312.97	0.597477	0.149216	4.00411	6.23e-05	0.0013851	chr3	149235022	149454501	8413	-	41.07	q25.1	protein_coding	WWTR1	WW domain containing transcription regulator 1 [Source:HGNC Symbol;Acc:24042]
372	ENSG00000018510	4694.72	0.350387	0.126796	2.76338	0.00572059	0.0393528	chr2	178257372	178408564	8197	+	36.02	q31.2	protein_coding	AGPS	alkylglycerone phosphate synthase [Source:HGNC Symbol;Acc:327]
373	ENSG00000018607	9.8382	-0.558269	0.702243	-0.794981	0.426625	0.665847	chr2	133066882	133076309	1774	+	40.79	q21.2	pseudogene	ZNF806	zinc finger protein 806 [Source:HGNC Symbol;Acc:33228]
374	ENSG00000018610	1283.44	-0.126818	0.113606	-1.1163	0.264295	0.507597	chrX	118672112	118699397	2606	-	44.31	q24	protein_coding	CXorf56	chromosome X open reading frame 56 [Source:HGNC Symbol;Acc:26239]
375	ENSG00000018625	107369	-0.586185	0.184179	-3.18268	0.00145917	0.0145823	chr1	160085549	160113381	6298	+	50.38	q23.2	protein_coding	ATP1A2	ATPase, Na+/K+ transporting, alpha 2 polypeptide [Source:HGNC Symbol;Acc:800]
376	ENSG00000018699	1162.29	-0.0932719	0.103243	-0.903418	0.366304	0.612626	chr2	32853099	33046118	3185	+	39.46	p22.3	protein_coding	TTC27	tetratricopeptide repeat domain 27 [Source:HGNC Symbol;Acc:25986]
377	ENSG00000018869	219.778	1.06967	0.196537	5.44261	5.25e-08	4.4e-06	chr19	56887413	56904914	3152	-	40.84	q13.43	protein_coding	ZNF582	zinc finger protein 582 [Source:HGNC Symbol;Acc:26421]
378	ENSG00000019102	108.439	-0.0813903	0.23627	-0.344481	0.730485	0.871428	chr11	124617368	124622134	1432	-	53.7	q24.2	protein_coding	VSIG2	V-set and immunoglobulin domain containing 2 [Source:HGNC Symbol;Acc:17149]
379	ENSG00000019144	7165.87	-0.229756	0.176161	-1.30424	0.192153	0.420784	chr11	118477155	118528741	21988	+	54.31	q23.3	protein_coding	PHLDB1	pleckstrin homology-like domain, family B, member 1 [Source:HGNC Symbol;Acc:23697]	MI0022550	hsa-mir-6716
380	ENSG00000019169	129.183	1.3462	0.8583	1.56845	0.116776	0.30768	chr2	119699742	119752236	2079	+	44.33	q14.2	protein_coding	MARCO	macrophage receptor with collagenous structure [Source:HGNC Symbol;Acc:6895]
381	ENSG00000019485	479.59	-0.577741	0.174095	-3.31853	0.000904923	0.0103225	chr11	45115564	45247734	5527	+	47.73	p11.2	protein_coding	PRDM11	PR domain containing 11 [Source:HGNC Symbol;Acc:13996]
382	ENSG00000019505	26.3599	-3.77484	0.759916	-4.96745	6.78e-07	3.68e-05	chr11	45261852	45307870	5424	-	46.27	p11.2	protein_coding	SYT13	synaptotagmin XIII [Source:HGNC Symbol;Acc:14962]
383	ENSG00000019549	233.922	0.807952	0.262454	3.07846	0.00208076	0.0188759	chr8	49830249	49834299	2282	-	40.95	q11.21	protein_coding	SNAI2	snail family zinc finger 2 [Source:HGNC Symbol;Acc:11094]
384	ENSG00000019582	7166.27	0.341663	0.134362	2.54285	0.0109953	0.0628917	chr5	149781200	149792492	3184	-	53.3	q32	protein_coding	CD74	CD74 molecule, major histocompatibility complex, class II invariant chain [Source:HGNC Symbol;Acc:1697]
385	ENSG00000019991	423.179	0.678277	0.350367	1.93591	0.0528792	0.185261	chr7	81328322	81399754	8897	-	34.42	q21.11	protein_coding	HGF	hepatocyte growth factor (hepapoietin A; scatter factor) [Source:HGNC Symbol;Acc:4893]
386	ENSG00000019995	10758.7	-0.208061	0.125997	-1.65132	0.0986735	0.276744	chr10	126630692	126676758	5993	+	39.68	q26.13	protein_coding	ZRANB1	zinc finger, RAN-binding domain containing 1 [Source:HGNC Symbol;Acc:18224]
387	ENSG00000020129	1209.02	0.267801	0.125543	2.13314	0.0329135	0.133979	chr1	36023074	36032875	4917	+	57.71	p34.3	protein_coding	NCDN	neurochondrin [Source:HGNC Symbol;Acc:17597]
388	ENSG00000020181	2773.02	0.11482	0.167554	0.685271	0.493173	0.718996	chr8	37641709	37702414	7061	+	55.25	p11.23	protein_coding	GPR124	G protein-coupled receptor 124 [Source:HGNC Symbol;Acc:17849]
389	ENSG00000020219	6.82307	0.768498	0.507303	1.51487	0.129805	0.329248	chr7	152142562	152144235	1674	+	57.11	q36.1	pseudogene	CCT8L1P	chaperonin containing TCP1, subunit 8 (theta)-like 1, pseudogene [Source:HGNC Symbol;Acc:32153]
390	ENSG00000020256	570.955	-0.244853	0.119344	-2.05166	0.0402023	0.153987	chr20	50668202	50820847	6997	-	44.05	q13.2	protein_coding	ZFP64	ZFP64 zinc finger protein [Source:HGNC Symbol;Acc:15940]
391	ENSG00000020426	4200.67	-0.0497014	0.108284	-0.458992	0.64624	0.821173	chr14	61201460	61436671	3865	+	36.62	q23.1	protein_coding	MNAT1	MNAT CDK-activating kinase assembly factor 1 [Source:HGNC Symbol;Acc:7181]
392	ENSG00000020577	20613.3	-0.488679	0.233804	-2.09013	0.0366065	0.144328	chr14	55033815	55260033	12170	+	43.1	q22.2	protein_coding	SAMD4A	sterile alpha motif domain containing 4A [Source:HGNC Symbol;Acc:23023]
393	ENSG00000020633	78.6532	0.0414908	0.26465	0.156776	0.875421	0.946022	chr1	25226002	25291612	4605	-	54.8	p36.11	protein_coding	RUNX3	runt-related transcription factor 3 [Source:HGNC Symbol;Acc:10473]
394	ENSG00000020922	1306.33	0.0361071	0.110429	0.326972	0.743689	0.879294	chr11	94152895	94227074	3538	-	37.27	q21	protein_coding	MRE11A	MRE11 meiotic recombination 11 homolog A (S. cerevisiae) [Source:HGNC Symbol;Acc:7230]
395	ENSG00000021300	326.535	-1.08716	0.369822	-2.93968	0.00328548	0.0264145	chr11	73357223	73373864	4933	+	52.94	q13.4	protein_coding	PLEKHB1	pleckstrin homology domain containing, family B (evectins) member 1 [Source:HGNC Symbol;Acc:19079]
396	ENSG00000021355	1888.45	0.211369	0.165123	1.28007	0.20052	0.431582	chr6	2832566	2842240	3226	-	43.16	p25.2	protein_coding	SERPINB1	serpin peptidase inhibitor, clade B (ovalbumin), member 1 [Source:HGNC Symbol;Acc:3311]
397	ENSG00000021461	56.8571	-0.456357	0.314591	-1.45063	0.146882	0.356646	chr7	99425636	99463718	2630	+	40.68	q22.1	protein_coding	CYP3A43	cytochrome P450, family 3, subfamily A, polypeptide 43 [Source:HGNC Symbol;Acc:17450]
398	ENSG00000021488	20.8858	-0.399217	0.404417	-0.987143	0.323573	0.571663	chr19	33321415	33360672	2597	-	46.62	q13.11	protein_coding	SLC7A9	solute carrier family 7 (amino acid transporter light chain, bo,+ system), member 9 [Source:HGNC Symbol;Acc:11067]
399	ENSG00000021574	2500.78	0.103838	0.131902	0.787231	0.431147	0.670084	chr2	32288680	32382706	5213	+	39.98	p22.3	protein_coding	SPAST	spastin [Source:HGNC Symbol;Acc:11233]
400	ENSG00000021645	105.857	1.20874	0.325003	3.71916	0.000199884	0.00336362	chr14	78708734	80330762	11335	+	39.19	q24.3	protein_coding	NRXN3	neurexin 3 [Source:HGNC Symbol;Acc:8010]
401	ENSG00000021762	1280.33	-0.148873	0.129206	-1.15222	0.249231	0.491033	chr11	3108346	3187969	7466	-	57	p15.4	protein_coding	OSBPL5	oxysterol binding protein-like 5 [Source:HGNC Symbol;Acc:16392]
402	ENSG00000021776	2993.83	0.068528	0.0778493	0.880265	0.378716	0.623877	chr15	35147732	35262040	9779	-	37.51	q14	protein_coding	AQR	aquarius intron-binding spliceosomal factor [Source:HGNC Symbol;Acc:29513]
403	ENSG00000021826	202.749	-0.323245	0.237651	-1.36017	0.173777	0.396006	chr2	211342406	211543831	10444	+	36.31	q34	protein_coding	CPS1	carbamoyl-phosphate synthase 1, mitochondrial [Source:HGNC Symbol;Acc:2323]
404	ENSG00000022267	659436	-0.418982	0.350747	-1.19454	0.232265	0.470706	chrX	135229559	135293518	4945	+	41.77	q26.3	protein_coding	FHL1	four and a half LIM domains 1 [Source:HGNC Symbol;Acc:3702]
405	ENSG00000022277	5285.49	-0.152419	0.106343	-1.43328	0.151779	0.36355	chr20	55043647	55093943	3501	+	43.66	q13.31	protein_coding	RTFDC1	replication termination factor 2 domain containing 1 [Source:HGNC Symbol;Acc:15890]
406	ENSG00000022556	14.2836	0.994017	0.634832	1.56579	0.117397	0.308772	chr19	55464498	55512510	6313	+	49.09	q13.42	protein_coding	NLRP2	NLR family, pyrin domain containing 2 [Source:HGNC Symbol;Acc:22948]
407	ENSG00000022567	947.521	-0.489963	0.181576	-2.6984	0.00696738	0.0453788	chr8	142217265	142318404	8608	-	52.64	q24.3	protein_coding	SLC45A4	solute carrier family 45, member 4 [Source:HGNC Symbol;Acc:29196]
408	ENSG00000022840	17025.6	-0.626469	0.191724	-3.26756	0.00108481	0.0118406	chr12	120971283	121015397	5911	+	45.25	q24.31	protein_coding	RNF10	ring finger protein 10 [Source:HGNC Symbol;Acc:10055]
409	ENSG00000022976	1637.49	-0.328078	0.15801	-2.07632	0.0378646	0.147654	chr14	102783714	102809044	5595	+	49.03	q32.31	protein_coding	ZNF839	zinc finger protein 839 [Source:HGNC Symbol;Acc:20345]
410	ENSG00000023041	1395.17	-0.0191784	0.115877	-0.165506	0.868546	0.942897	chr10	114190058	114206672	2404	-	37.73	q25.2	protein_coding	ZDHHC6	zinc finger, DHHC-type containing 6 [Source:HGNC Symbol;Acc:19160]
411	ENSG00000023171	1964.11	0.924324	0.15728	5.87692	4.18e-09	4.6e-07	chr11	123396344	123498482	9770	+	48.01	q24.1	protein_coding	GRAMD1B	GRAM domain containing 1B [Source:HGNC Symbol;Acc:29214]
412	ENSG00000023191	6311.3	0.209842	0.109724	1.91245	0.0558191	0.191701	chr11	494512	507300	7367	-	60.36	p15.5	protein_coding	RNH1	ribonuclease/angiogenin inhibitor 1 [Source:HGNC Symbol;Acc:10074]
413	ENSG00000023228	48059.2	-0.406924	0.200855	-2.02596	0.0427686	0.160618	chr2	206979541	207024327	12268	-	40.81	q33.3	protein_coding	NDUFS1	NADH dehydrogenase (ubiquinone) Fe-S protein 1, 75kDa (NADH-coenzyme Q reductase) [Source:HGNC Symbol;Acc:7707]
414	ENSG00000023287	13369	-0.561601	0.120588	-4.6572	3.21e-06	0.000129429	chr8	53535016	53658403	7615	-	37.73	q11.23	protein_coding	RB1CC1	RB1-inducible coiled-coil 1 [Source:HGNC Symbol;Acc:15574]
415	ENSG00000023318	2091.1	-0.279194	0.132235	-2.11134	0.0347432	0.139239	chr9	102741461	102861322	4854	-	37.86	q31.1	protein_coding	ERP44	endoplasmic reticulum protein 44 [Source:HGNC Symbol;Acc:18311]
416	ENSG00000023330	5459.99	-0.371567	0.251877	-1.47519	0.14016	0.345864	chr3	52232102	52248343	2536	+	45.47	p21.2	protein_coding	ALAS1	aminolevulinate, delta-, synthase 1 [Source:HGNC Symbol;Acc:396]
417	ENSG00000023445	667.263	-0.351382	0.282137	-1.24543	0.212973	0.447358	chr11	102188215	102210134	7484	+	37.57	q22.2	protein_coding	BIRC3	baculoviral IAP repeat containing 3 [Source:HGNC Symbol;Acc:591]
418	ENSG00000023516	5518.14	0.68183	0.18595	3.66673	0.000245674	0.00393713	chr13	42846289	42897396	9913	+	36.45	q14.11	protein_coding	AKAP11	A kinase (PRKA) anchor protein 11 [Source:HGNC Symbol;Acc:369]
419	ENSG00000023572	953.86	0.493116	0.225405	2.18769	0.0286924	0.121992	chr1	193065598	193075244	1299	-	41.92	q31.2	protein_coding	GLRX2	glutaredoxin 2 [Source:HGNC Symbol;Acc:16065]
420	ENSG00000023608	915.35	-0.182781	0.245758	-0.743742	0.457033	0.689815	chr14	62229075	62263146	2656	+	39.61	q23.2	protein_coding	SNAPC1	small nuclear RNA activating complex, polypeptide 1, 43kDa [Source:HGNC Symbol;Acc:11134]
421	ENSG00000023697	1170.44	0.0820761	0.141995	0.578022	0.563249	0.768025	chr12	16064106	16190220	2848	+	39.15	p12.3	protein_coding	DERA	deoxyribose-phosphate aldolase (putative) [Source:HGNC Symbol;Acc:24269]
422	ENSG00000023734	5421.53	-0.183785	0.136116	-1.35021	0.176948	0.39999	chr12	16035325	16056412	2211	+	36.48	p12.3	protein_coding	STRAP	serine/threonine kinase receptor associated protein [Source:HGNC Symbol;Acc:30796]
423	ENSG00000023839	374.737	-0.767824	0.221248	-3.47042	0.000519644	0.00695971	chr10	101542489	101611949	6232	+	45.12	q24.2	protein_coding	ABCC2	ATP-binding cassette, sub-family C (CFTR/MRP), member 2 [Source:HGNC Symbol;Acc:53]
424	ENSG00000023892	139.047	0.25912	0.206936	1.25217	0.210506	0.444469	chr6	35265595	35289548	2675	+	48.5	p21.31	protein_coding	DEF6	differentially expressed in FDCP 6 homolog (mouse) [Source:HGNC Symbol;Acc:2760]
425	ENSG00000023902	1888.85	-0.120112	0.201656	-0.595628	0.551424	0.760324	chr1	150121373	150136916	6629	+	51.61	q21.2	protein_coding	PLEKHO1	pleckstrin homology domain containing, family O member 1 [Source:HGNC Symbol;Acc:24310]
426	ENSG00000023909	2150.58	0.0709675	0.231976	0.305926	0.759661	0.887217	chr1	94350761	94374966	5374	-	36.34	p22.1	protein_coding	GCLM	glutamate-cysteine ligase, modifier subunit [Source:HGNC Symbol;Acc:4312]
427	ENSG00000024048	16694.4	-0.302282	0.10422	-2.90042	0.00372667	0.0289149	chr6	42531800	42661242	8997	+	39.1	p21.1	protein_coding	UBR2	ubiquitin protein ligase E3 component n-recognin 2 [Source:HGNC Symbol;Acc:21289]
428	ENSG00000024422	2123.04	-0.224341	0.199023	-1.12721	0.259652	0.502589	chr19	48216600	48246391	3923	+	52.96	q13.33	protein_coding	EHD2	EH-domain containing 2 [Source:HGNC Symbol;Acc:3243]
429	ENSG00000024526	42.4287	0.237578	0.340907	0.696899	0.485866	0.713286	chr1	68939835	68962904	5904	-	34.94	p31.2	protein_coding	DEPDC1	DEP domain containing 1 [Source:HGNC Symbol;Acc:22949]
430	ENSG00000024862	633.671	0.18143	0.113105	1.60409	0.108695	0.293877	chr6	139094657	139114456	1496	+	39.16	q24.1	protein_coding	CCDC28A	coiled-coil domain containing 28A [Source:HGNC Symbol;Acc:21098]
431	ENSG00000025039	16683.1	-0.59593	0.197498	-3.0174	0.00254949	0.0219387	chr6	90074355	90121989	5072	-	42.25	q15	protein_coding	RRAGD	Ras-related GTP binding D [Source:HGNC Symbol;Acc:19903]
432	ENSG00000025156	4156.53	-0.17557	0.182476	-0.96215	0.335974	0.584044	chr6	122720691	122754264	2702	+	35.55	q22.31	protein_coding	HSF2	heat shock transcription factor 2 [Source:HGNC Symbol;Acc:5225]
433	ENSG00000025293	7019.19	-0.507073	0.141432	-3.58528	0.000336711	0.00497298	chr20	34359896	34538303	7812	+	44.08	q11.22	protein_coding	PHF20	PHD finger protein 20 [Source:HGNC Symbol;Acc:16098]
434	ENSG00000025423	37.3291	-0.439258	0.270862	-1.6217	0.104867	0.287543	chr12	57145945	57181574	2272	+	44.92	q13.3	protein_coding	HSD17B6	hydroxysteroid (17-beta) dehydrogenase 6 [Source:HGNC Symbol;Acc:23316]
435	ENSG00000025434	564.403	-0.226232	0.201438	-1.12309	0.261401	0.504396	chr11	47269851	47290396	4346	+	50.81	p11.2	protein_coding	NR1H3	nuclear receptor subfamily 1, group H, member 3 [Source:HGNC Symbol;Acc:7966]
436	ENSG00000025770	1988.87	-0.116802	0.184614	-0.632684	0.52694	0.743227	chr22	50946645	50961901	3159	+	55.08	q13.33	protein_coding	NCAPH2	non-SMC condensin II complex, subunit H2 [Source:HGNC Symbol;Acc:25071]
437	ENSG00000025772	644.386	0.128256	0.180494	0.710583	0.477342	0.706495	chr20	43570771	43589127	2062	-	45.11	q13.12	protein_coding	TOMM34	translocase of outer mitochondrial membrane 34 [Source:HGNC Symbol;Acc:15746]
438	ENSG00000025796	2996.89	-0.0669433	0.111616	-0.599762	0.548665	0.758051	chr6	108188960	108279393	8587	-	39.82	q21	protein_coding	SEC63	SEC63 homolog (S. cerevisiae) [Source:HGNC Symbol;Acc:21082]
439	ENSG00000025800	13119.5	-0.428163	0.137772	-3.10777	0.00188503	0.0176476	chr1	32573639	32642169	7687	+	44.21	p35.1	protein_coding	KPNA6	karyopherin alpha 6 (importin alpha 7) [Source:HGNC Symbol;Acc:6399]
440	ENSG00000026025	18679.7	0.249114	0.197063	1.26413	0.206182	0.438948	chr10	17270258	17279592	4965	+	46.25	p13	protein_coding	VIM	vimentin [Source:HGNC Symbol;Acc:12692]
441	ENSG00000026036	3016.67	0.0577481	0.146196	0.395005	0.692839	0.849879	chr20	62290653	62330037	8738	+	59.83	q13.33	protein_coding	RTEL1-TNFRSF6B	RTEL1-TNFRSF6B readthrough (NMD candidate) [Source:HGNC Symbol;Acc:44095]
442	ENSG00000026103	593.429	0.349228	0.221879	1.57396	0.115497	0.30533	chr10	90750414	90775542	3562	+	37.77	q23.31	protein_coding	FAS	Fas cell surface death receptor [Source:HGNC Symbol;Acc:11920]
443	ENSG00000026297	535.845	-0.0375739	0.193071	-0.194612	0.845697	0.932041	chr6	167342992	167370679	7478	-	48.7	q27	protein_coding	RNASET2	ribonuclease T2 [Source:HGNC Symbol;Acc:21686]
444	ENSG00000026508	3434.37	0.351898	0.340514	1.03343	0.301402	0.548722	chr11	35160417	35253949	10060	+	41.56	p13	protein_coding	CD44	CD44 molecule (Indian blood group) [Source:HGNC Symbol;Acc:1681]
445	ENSG00000026652	773.214	0.206771	0.156841	1.31835	0.187386	0.413985	chr6	161551011	161695093	9419	-	45.36	q26	protein_coding	AGPAT4	1-acylglycerol-3-phosphate O-acyltransferase 4 [Source:HGNC Symbol;Acc:20885]
446	ENSG00000026751	45.1543	-0.16728	0.295934	-0.565262	0.571896	0.774155	chr1	160709037	160724611	4604	+	44.04	q23.3	protein_coding	SLAMF7	SLAM family member 7 [Source:HGNC Symbol;Acc:21394]
447	ENSG00000026950	1344.94	-0.496911	0.282669	-1.75792	0.0787603	0.23951	chr6	26402465	26415444	5547	+	44.46	p22.2	protein_coding	BTN3A1	butyrophilin, subfamily 3, member A1 [Source:HGNC Symbol;Acc:1138]
448	ENSG00000027001	1078.79	0.08183	0.146025	0.560382	0.575219	0.776091	chr13	24304328	24463558	3407	-	39.76	q12.12	protein_coding	MIPEP	mitochondrial intermediate peptidase [Source:HGNC Symbol;Acc:7104]
449	ENSG00000027075	1919.65	-0.323977	0.14957	-2.16605	0.0303073	0.126672	chr14	61654277	62017694	8809	+	42.48	q23.1	protein_coding	PRKCH	protein kinase C, eta [Source:HGNC Symbol;Acc:9403]
450	ENSG00000027644	88.1911	0.127059	0.364022	0.349041	0.727059	0.869416	chr1	156809855	156828810	5101	-	55.51	q23.1	protein_coding	INSRR	insulin receptor-related receptor [Source:HGNC Symbol;Acc:6093]
451	ENSG00000027697	2703.82	-0.0629982	0.110194	-0.5717	0.567525	0.771088	chr6	137518621	137540586	2680	-	38.81	q23.3	protein_coding	IFNGR1	interferon gamma receptor 1 [Source:HGNC Symbol;Acc:5439]
452	ENSG00000027847	1070.7	-0.137375	0.113528	-1.21005	0.22626	0.463487	chr5	177027101	177037348	4927	+	57.92	q35.3	protein_coding	B4GALT7	xylosylprotein beta 1,4-galactosyltransferase, polypeptide 7 [Source:HGNC Symbol;Acc:930]
453	ENSG00000027869	42.9969	-0.186985	0.29798	-0.627507	0.530327	0.745499	chr1	156776035	156786654	2512	-	55.56	q23.1	protein_coding	SH2D2A	SH2 domain containing 2A [Source:HGNC Symbol;Acc:10821]
454	ENSG00000028116	1954.28	-0.180351	0.127206	-1.41779	0.156252	0.370536	chr2	58134786	58387055	3557	+	35.24	p16.1	protein_coding	VRK2	vaccinia related kinase 2 [Source:HGNC Symbol;Acc:12719]
455	ENSG00000028137	1568.5	-0.613976	0.292823	-2.09675	0.0360159	0.142786	chr1	12227060	12269285	3766	+	55.39	p36.22	protein_coding	TNFRSF1B	tumor necrosis factor receptor superfamily, member 1B [Source:HGNC Symbol;Acc:11917]
456	ENSG00000028203	8933.08	-0.261053	0.129745	-2.01205	0.0442145	0.164418	chr12	95611522	95696566	8757	+	38.6	q22	protein_coding	VEZT	vezatin, adherens junctions transmembrane protein [Source:HGNC Symbol;Acc:18258]
457	ENSG00000028277	98.2631	0.556608	0.176308	3.15701	0.00159393	0.0155458	chr19	42590263	42700737	8899	-	51.31	q13.2	protein_coding	POU2F2	POU class 2 homeobox 2 [Source:HGNC Symbol;Acc:9213]
458	ENSG00000028310	2785.62	-0.101061	0.134058	-0.753859	0.450934	0.685702	chr5	850406	892939	9577	-	55.14	p15.33	protein_coding	BRD9	bromodomain containing 9 [Source:HGNC Symbol;Acc:25818]
459	ENSG00000028528	6289.7	-0.167015	0.0786198	-2.12434	0.0336416	0.135981	chr15	64386322	64438289	9796	+	43.68	q22.31	protein_coding	SNX1	sorting nexin 1 [Source:HGNC Symbol;Acc:11172]
460	ENSG00000028839	891.124	-0.2741	0.187773	-1.45974	0.144362	0.352903	chr6	134273308	134311570	5039	+	37.6	q23.2	protein_coding	TBPL1	TBP-like 1 [Source:HGNC Symbol;Acc:11589]
461	ENSG00000029153	78.1459	-0.451173	0.480315	-0.939329	0.347562	0.595149	chr12	27485787	27576241	5002	+	39.28	p11.23	protein_coding	ARNTL2	aryl hydrocarbon receptor nuclear translocator-like 2 [Source:HGNC Symbol;Acc:18984]
462	ENSG00000029363	14875.2	-0.0110856	0.120569	-0.0919435	0.926743	0.96854	chr6	136578001	136610989	9297	-	35.61	q23.3	protein_coding	BCLAF1	BCL2-associated transcription factor 1 [Source:HGNC Symbol;Acc:16863]
463	ENSG00000029364	2561.1	0.0597392	0.11041	0.541064	0.588463	0.784458	chr14	69864732	69929105	7136	+	40.2	q24.1	protein_coding	SLC39A9	solute carrier family 39, member 9 [Source:HGNC Symbol;Acc:20182]
464	ENSG00000029534	34821.9	-0.212206	0.230819	-0.919361	0.357907	0.604685	chr8	41510739	41754280	10799	-	49.32	p11.21	protein_coding	ANK1	ankyrin 1, erythrocytic [Source:HGNC Symbol;Acc:492]
465	ENSG00000029559	7.25862	-0.112247	1.00793	-0.111364	0.911328	0.961932	chr4	88720733	88733074	1033	+	36.21	q22.1	protein_coding	IBSP	integrin-binding sialoprotein [Source:HGNC Symbol;Acc:5341]
466	ENSG00000029639	964.118	0.0119885	0.158686	0.0755487	0.939778	0.97429	chr6	155578643	155635627	2736	-	38.35	q25.3	protein_coding	TFB1M	transcription factor B1, mitochondrial [Source:HGNC Symbol;Acc:17037]
467	ENSG00000029725	14726.1	-0.445725	0.133779	-3.3318	0.000862877	0.0100079	chr17	5185558	5289129	6555	+	41.37	p13.2	protein_coding	RABEP1	rabaptin, RAB GTPase binding effector protein 1 [Source:HGNC Symbol;Acc:17677]
468	ENSG00000029993	610.877	1.41689	0.376019	3.76814	0.000164471	0.00291495	chrX	150148982	150159248	3967	+	51.16	q28	protein_coding	HMGB3	high mobility group box 3 [Source:HGNC Symbol;Acc:5004]
469	ENSG00000030066	3357.48	-0.0337212	0.123816	-0.27235	0.785353	0.901577	chr11	47799639	47870107	8471	-	41.86	p11.2	protein_coding	NUP160	nucleoporin 160kDa [Source:HGNC Symbol;Acc:18017]
470	ENSG00000030110	889.909	-0.0367612	0.197253	-0.186365	0.852158	0.935066	chr6	33540329	33548019	2267	-	57.17	p21.31	protein_coding	BAK1	BCL2-antagonist/killer 1 [Source:HGNC Symbol;Acc:949]
471	ENSG00000030304	2136.31	2.87892	0.455548	6.3197	2.62e-10	4.23e-08	chr9	113431051	113563859	4159	+	36.45	q31.3	protein_coding	MUSK	muscle, skeletal, receptor tyrosine kinase [Source:HGNC Symbol;Acc:7525]
472	ENSG00000030419	2731.19	-0.224068	0.125156	-1.7903	0.0734051	0.228715	chr2	213864429	214017151	12220	-	34.84	q34	protein_coding	IKZF2	IKAROS family zinc finger 2 (Helios) [Source:HGNC Symbol;Acc:13177]
473	ENSG00000030582	3057.6	0.0345376	0.115585	0.298807	0.765087	0.890313	chr17	42422614	42430470	3520	+	57.76	q21.31	protein_coding	GRN	granulin [Source:HGNC Symbol;Acc:4601]
474	ENSG00000031003	2539.66	0.0544366	0.0794255	0.685379	0.493105	0.718944	chr5	137273649	137387650	6808	-	40.05	q31.2	protein_coding	FAM13B	family with sequence similarity 13, member B [Source:HGNC Symbol;Acc:1335]
475	ENSG00000031081	2581.2	0.161451	0.155086	1.04104	0.297857	0.545081	chr3	119013220	119139561	9384	+	43.44	q13.33	protein_coding	ARHGAP31	Rho GTPase activating protein 31 [Source:HGNC Symbol;Acc:29216]
476	ENSG00000031544	31.0294	0.347018	0.258336	1.34328	0.179181	0.403264	chr15	72084977	72110600	3595	+	49.58	q23	processed_transcript	NR2E3	nuclear receptor subfamily 2, group E, member 3 [Source:HGNC Symbol;Acc:7974]
477	ENSG00000031691	271.676	0.0679099	0.204666	0.331808	0.740034	0.877206	chr6	49431091	49460820	1733	+	37.99	p12.3	protein_coding	CENPQ	centromere protein Q [Source:HGNC Symbol;Acc:21347]
478	ENSG00000031698	5958.61	-0.240188	0.215615	-1.11397	0.265293	0.508861	chr1	109756540	109780791	3836	+	43.12	p13.3	protein_coding	SARS	seryl-tRNA synthetase [Source:HGNC Symbol;Acc:10537]
479	ENSG00000031823	2331.96	-0.233205	0.104179	-2.2385	0.0251884	0.111522	chr19	5916150	5978153	7445	-	52.74	p13.3	protein_coding	RANBP3	RAN binding protein 3 [Source:HGNC Symbol;Acc:9850]
480	ENSG00000032219	1953.36	-0.192231	0.123211	-1.56017	0.118719	0.31068	chr14	58765103	58840605	7568	+	37.48	q23.1	protein_coding	ARID4A	AT rich interactive domain 4A (RBP1-like) [Source:HGNC Symbol;Acc:9885]
481	ENSG00000032389	856.051	0.0263692	0.12275	0.214821	0.829907	0.924435	chr2	3192696	3381653	5775	-	48.27	p25.3	protein_coding	TSSC1	tumor suppressing subtransferable candidate 1 [Source:HGNC Symbol;Acc:12383]
482	ENSG00000032444	3478.04	-0.455012	0.111074	-4.09646	4.2e-05	0.00101232	chr19	7598890	7626650	7055	+	55.88	p13.2	protein_coding	PNPLA6	patatin-like phospholipase domain containing 6 [Source:HGNC Symbol;Acc:16268]
483	ENSG00000032742	1234.96	0.336346	0.231934	1.45018	0.147008	0.356646	chr13	21140585	21265503	5480	+	38.86	q12.11	protein_coding	IFT88	intraflagellar transport 88 homolog (Chlamydomonas) [Source:HGNC Symbol;Acc:20606]
484	ENSG00000033011	742.161	0.0817669	0.128983	0.633938	0.526121	0.742655	chr16	5083703	5137380	5786	+	49.38	p13.3	protein_coding	ALG1	ALG1, chitobiosyldiphosphodolichol beta-mannosyltransferase [Source:HGNC Symbol;Acc:18294]
485	ENSG00000033030	2380.89	-0.11036	0.0983256	-1.1224	0.261693	0.504592	chr12	122957417	122985518	7752	-	42.68	q24.31	protein_coding	ZCCHC8	zinc finger, CCHC domain containing 8 [Source:HGNC Symbol;Acc:25265]
486	ENSG00000033050	5441.03	-0.087565	0.114429	-0.765236	0.444131	0.680216	chr7	150904923	150924316	4448	-	49.19	q36.1	protein_coding	ABCF2	ATP-binding cassette, sub-family F (GCN20), member 2 [Source:HGNC Symbol;Acc:71]
487	ENSG00000033100	1932.97	0.505129	0.145887	3.46246	0.000535258	0.0071166	chr7	150929575	150935908	4200	+	56.84	q36.1	protein_coding	CHPF2	chondroitin polymerizing factor 2 [Source:HGNC Symbol;Acc:29270]	MI0003760	hsa-mir-671
488	ENSG00000033122	526.552	-0.223791	0.319048	-0.701435	0.483032	0.710897	chr1	70034081	70617628	14652	+	35.35	p31.1	protein_coding	LRRC7	leucine rich repeat containing 7 [Source:HGNC Symbol;Acc:18531]
489	ENSG00000033170	865.369	0.24615	0.140669	1.74986	0.0801432	0.242014	chr14	65877310	66210839	6889	+	37.41	q23.3	protein_coding	FUT8	fucosyltransferase 8 (alpha (1,6) fucosyltransferase) [Source:HGNC Symbol;Acc:4019]
490	ENSG00000033178	3867.82	0.26762	0.0822847	3.25237	0.00114446	0.0122911	chr4	68478370	68566897	11432	-	35.52	q13.2	protein_coding	UBA6	ubiquitin-like modifier activating enzyme 6 [Source:HGNC Symbol;Acc:25581]
491	ENSG00000033327	1641.55	-0.0335024	0.222735	-0.150414	0.880438	0.948736	chr11	77926343	78129394	6771	-	41.71	q14.1	protein_coding	GAB2	GRB2-associated binding protein 2 [Source:HGNC Symbol;Acc:14458]
492	ENSG00000033627	9034.97	-0.202642	0.158068	-1.28199	0.199845	0.430702	chr17	40610862	40674629	10968	+	45.47	q21.2	protein_coding	ATP6V0A1	ATPase, H+ transporting, lysosomal V0 subunit a1 [Source:HGNC Symbol;Acc:865]
493	ENSG00000033800	2274.93	-0.137829	0.0790489	-1.74359	0.08123	0.244131	chr15	68346517	68483096	4524	+	37.51	q23	protein_coding	PIAS1	protein inhibitor of activated STAT, 1 [Source:HGNC Symbol;Acc:2752]
494	ENSG00000033867	5157.39	0.279355	0.137429	2.03273	0.04208	0.158912	chr3	27414214	27525911	9564	-	36.85	p24.1	protein_coding	SLC4A7	solute carrier family 4, sodium bicarbonate cotransporter, member 7 [Source:HGNC Symbol;Acc:11033]
495	ENSG00000034053	28.3326	-0.256322	0.414982	-0.61767	0.536793	0.74998	chr15	29129629	29410518	6869	+	48.6	q13.1	protein_coding	APBA2	amyloid beta (A4) precursor protein-binding, family A, member 2 [Source:HGNC Symbol;Acc:579]
496	ENSG00000034063	106.714	0.241809	0.325874	0.742032	0.458068	0.690567	chr19	4903092	4962165	5144	+	52.99	p13.3	processed_transcript	UHRF1	ubiquitin-like with PHD and ring finger domains 1 [Source:HGNC Symbol;Acc:12556]
497	ENSG00000034152	4568.15	-0.740865	0.313914	-2.36009	0.0182706	0.0896413	chr17	21187984	21218552	3783	+	56.97	p11.2	protein_coding	MAP2K3	mitogen-activated protein kinase kinase 3 [Source:HGNC Symbol;Acc:6843]
498	ENSG00000034239	7.31999	-0.0876844	0.727117	-0.120592	0.904014	0.959004	chr8	49623348	49647870	5805	-	40.09	q11.21	protein_coding	EFCAB1	EF-hand calcium binding domain 1 [Source:HGNC Symbol;Acc:25678]
499	ENSG00000034510	4324.81	0.214285	0.201179	1.06514	0.286811	0.532677	chr2	85132749	85133795	492	+	63.32	p11.2	protein_coding	TMSB10	thymosin beta 10 [Source:HGNC Symbol;Acc:11879]
500	ENSG00000034533	736.049	-0.23205	0.119653	-1.93936	0.0524573	0.184271	chr3	130732719	130746493	3427	-	39.7	q22.1	protein_coding	ASTE1	asteroid homolog 1 (Drosophila) [Source:HGNC Symbol;Acc:25021]
501	ENSG00000034677	5733.72	0.0263987	0.141143	0.187035	0.851633	0.934946	chr8	101269288	101348446	6031	-	38.61	q22.2	protein_coding	RNF19A	ring finger protein 19A, RBR E3 ubiquitin protein ligase [Source:HGNC Symbol;Acc:13432]
502	ENSG00000034693	1047.26	0.043528	0.104529	0.416419	0.677103	0.840057	chr6	143771944	143811147	2222	+	35.11	q24.2	protein_coding	PEX3	peroxisomal biogenesis factor 3 [Source:HGNC Symbol;Acc:8858]
503	ENSG00000034713	4502.87	-0.0620956	0.165752	-0.37463	0.707936	0.859376	chr16	75600249	75611779	3034	+	47.18	q23.1	protein_coding	GABARAPL2	GABA(A) receptor-associated protein-like 2 [Source:HGNC Symbol;Acc:13291]
504	ENSG00000034971	2482.26	-0.00422493	0.43894	-0.00962528	0.99232	0.996336	chr1	171604557	171621823	2095	-	45.71	q24.3	protein_coding	MYOC	myocilin, trabecular meshwork inducible glucocorticoid response [Source:HGNC Symbol;Acc:7610]
505	ENSG00000035115	2028.7	0.237723	0.205423	1.15724	0.247174	0.488886	chr2	217730	266398	11165	-	40.78	p25.3	protein_coding	SH3YL1	SH3 and SYLF domain containing 1 [Source:HGNC Symbol;Acc:29546]
506	ENSG00000035141	1178.66	0.238748	0.164624	1.45026	0.146985	0.356646	chr2	70523107	70529222	3086	-	48.46	p13.3	protein_coding	FAM136A	family with sequence similarity 136, member A [Source:HGNC Symbol;Acc:25911]
507	ENSG00000035403	22435	-0.251408	0.140777	-1.78586	0.0741227	0.230233	chr10	75757872	75879918	5818	+	41.27	q22.2	protein_coding	VCL	vinculin [Source:HGNC Symbol;Acc:12665]
508	ENSG00000035499	6.22057	0.368383	0.641461	0.574287	0.565774	0.769939	chr5	59892739	59996017	3806	-	38.63	q12.1	protein_coding	DEPDC1B	DEP domain containing 1B [Source:HGNC Symbol;Acc:24902]
509	ENSG00000035664	7697.25	0.169636	0.166471	1.01901	0.308197	0.556616	chr15	64199235	64364232	7041	-	46.89	q22.31	protein_coding	DAPK2	death-associated protein kinase 2 [Source:HGNC Symbol;Acc:2675]
510	ENSG00000035681	2803.44	-0.0664732	0.0951281	-0.698775	0.484692	0.712347	chr8	59496063	59572403	6165	-	38.41	q12.1	protein_coding	NSMAF	neutral sphingomyelinase (N-SMase) activation associated factor [Source:HGNC Symbol;Acc:8017]
511	ENSG00000035687	1031.48	-0.111689	0.118414	-0.943204	0.345576	0.593355	chr1	244571796	244615436	3666	-	38.3	q44	protein_coding	ADSS	adenylosuccinate synthase [Source:HGNC Symbol;Acc:292]
512	ENSG00000035720	29.5532	1.24397	0.543957	2.2869	0.0222018	0.102341	chr4	68424446	68473055	1655	+	37.8	q13.2	protein_coding	STAP1	signal transducing adaptor family member 1 [Source:HGNC Symbol;Acc:24133]
513	ENSG00000035862	3738.85	0.182953	0.315901	0.579147	0.56249	0.76769	chr17	76849059	76921469	5633	-	52.6	q25.3	protein_coding	TIMP2	TIMP metallopeptidase inhibitor 2 [Source:HGNC Symbol;Acc:11821]
514	ENSG00000035928	3436.22	-0.116995	0.117694	-0.994064	0.320192	0.568024	chr4	39289076	39367995	6713	-	39.26	p14	protein_coding	RFC1	replication factor C (activator 1) 1, 145kDa [Source:HGNC Symbol;Acc:9969]
515	ENSG00000036054	4047.68	-0.210276	0.130841	-1.60711	0.108031	0.292788	chr3	99979844	100044095	5168	+	36.46	q12.1	protein_coding	TBC1D23	TBC1 domain family, member 23 [Source:HGNC Symbol;Acc:25622]
516	ENSG00000036257	9542.57	-0.482316	0.164455	-2.93281	0.00335905	0.0268859	chr2	225334867	225450110	11501	-	37.23	q36.2	protein_coding	CUL3	cullin 3 [Source:HGNC Symbol;Acc:2553]
517	ENSG00000036448	73086.3	-0.972927	0.549493	-1.77059	0.0766289	0.23536	chr8	1993155	2113475	7062	+	46.58	p23.3	protein_coding	MYOM2	myomesin 2 [Source:HGNC Symbol;Acc:7614]
518	ENSG00000036473	5.24291	0.0504519	0.797858	0.0632343	0.94958	0.97821	chrX	38211798	38280703	1585	+	39.3	p11.4	protein_coding	OTC	ornithine carbamoyltransferase [Source:HGNC Symbol;Acc:8512]
519	ENSG00000036530	247.172	0.818476	0.202963	4.03263	5.52e-05	0.00125198	chr14	100150641	100193638	9354	+	47.28	q32.2	protein_coding	CYP46A1	cytochrome P450, family 46, subfamily A, polypeptide 1 [Source:HGNC Symbol;Acc:2641]
520	ENSG00000036549	4864.43	0.030953	0.0720683	0.429496	0.667563	0.834319	chr1	78028101	78149104	9008	-	37.17	p31.1	protein_coding	ZZZ3	zinc finger, ZZ-type containing 3 [Source:HGNC Symbol;Acc:24523]
521	ENSG00000036672	6925.25	-0.677908	0.26408	-2.56706	0.0102566	0.0598917	chr11	119225925	119252436	4538	-	54.64	q23.3	protein_coding	USP2	ubiquitin specific peptidase 2 [Source:HGNC Symbol;Acc:12618]
522	ENSG00000037042	839.079	-0.264585	0.198004	-1.33626	0.181464	0.406041	chr17	40811323	40819024	2772	+	51.9	q21.2	protein_coding	TUBG2	tubulin, gamma 2 [Source:HGNC Symbol;Acc:12419]
523	ENSG00000037241	515.438	0.114943	0.146618	0.783962	0.433062	0.67171	chr5	172385732	172396774	1164	+	46.12	q35.1	protein_coding	RPL26L1	ribosomal protein L26-like 1 [Source:HGNC Symbol;Acc:17050]
524	ENSG00000037280	816.897	-0.497434	0.193656	-2.56865	0.0102095	0.0596778	chr5	180028506	180076624	8849	-	60.24	q35.3	protein_coding	FLT4	fms-related tyrosine kinase 4 [Source:HGNC Symbol;Acc:3767]
525	ENSG00000037474	3699.8	-0.160488	0.11613	-1.38197	0.166981	0.38631	chr5	6599352	6633404	5506	-	43.29	p15.31	protein_coding	NSUN2	NOP2/Sun RNA methyltransferase family, member 2 [Source:HGNC Symbol;Acc:25994]
526	ENSG00000037637	4095.73	-0.239021	0.100481	-2.37878	0.01737	0.0867488	chr1	16573334	16678949	8984	-	43.85	p36.13	protein_coding	FBXO42	F-box protein 42 [Source:HGNC Symbol;Acc:29249]
527	ENSG00000037749	3348.31	-0.100464	0.11381	-0.882736	0.377379	0.622585	chr5	153418466	153600038	7213	+	43.54	q33.2	protein_coding	MFAP3	microfibrillar-associated protein 3 [Source:HGNC Symbol;Acc:7034]
528	ENSG00000037757	1380.01	0.412806	0.158286	2.60798	0.00910784	0.0548881	chr19	13875346	13885096	3456	+	52.16	p13.2	protein_coding	MRI1	methylthioribose-1-phosphate isomerase 1 [Source:HGNC Symbol;Acc:28469]
529	ENSG00000037897	222.374	0.39502	0.185272	2.1321	0.0329984	0.134225	chr12	58162254	58166576	2621	-	54.22	q14.1	protein_coding	METTL1	methyltransferase like 1 [Source:HGNC Symbol;Acc:7030]
530	ENSG00000037965	26.0625	-0.0586512	0.344492	-0.170254	0.86481	0.941341	chr12	54402832	54407570	3371	+	51.66	q13.13	protein_coding	HOXC8	homeobox C8 [Source:HGNC Symbol;Acc:5129]
531	ENSG00000038002	559.922	-0.250366	0.193649	-1.29289	0.19605	0.425953	chr4	178351924	178363657	2675	-	39.89	q34.3	protein_coding	AGA	aspartylglucosaminidase [Source:HGNC Symbol;Acc:318]
532	ENSG00000038210	892.463	0.2271	0.146619	1.54891	0.121403	0.315139	chr4	25162263	25280714	7332	+	41.17	p15.2	protein_coding	PI4K2B	phosphatidylinositol 4-kinase type 2 beta [Source:HGNC Symbol;Acc:18215]
533	ENSG00000038219	8377.25	0.0987818	0.0789697	1.25088	0.210978	0.445139	chr4	13570362	13629347	15860	-	38.88	p15.33	protein_coding	BOD1L1	biorientation of chromosomes in cell division 1-like 1 [Source:HGNC Symbol;Acc:31792]
534	ENSG00000038274	2908.42	-0.21338	0.132208	-1.61397	0.106535	0.290152	chr5	162930120	162946342	5153	+	38.25	q34	protein_coding	MAT2B	methionine adenosyltransferase II, beta [Source:HGNC Symbol;Acc:6905]
535	ENSG00000038295	285.255	-0.147667	0.350484	-0.421323	0.673519	0.837894	chr4	166794410	167025047	7522	+	35.72	q32.3	protein_coding	TLL1	tolloid-like 1 [Source:HGNC Symbol;Acc:11843]
536	ENSG00000038358	3634.99	-0.279699	0.115786	-2.41566	0.0157068	0.0808584	chr16	67906926	67918406	6173	+	57.32	q22.1	protein_coding	EDC4	enhancer of mRNA decapping 4 [Source:HGNC Symbol;Acc:17157]
537	ENSG00000038382	12698.2	-0.0669584	0.13725	-0.487859	0.62565	0.807703	chr5	14143811	14532235	17500	+	43.35	p15.2	protein_coding	TRIO	trio Rho guanine nucleotide exchange factor [Source:HGNC Symbol;Acc:12303]
538	ENSG00000038427	7587.9	0.799223	0.245255	3.25875	0.00111905	0.0121022	chr5	82767284	82878122	14831	+	37.22	q14.2	protein_coding	VCAN	versican [Source:HGNC Symbol;Acc:2464]
539	ENSG00000038532	3174.49	-0.244969	0.13372	-1.83195	0.0669585	0.215403	chr16	11038345	11276046	11944	+	48.06	p13.13	protein_coding	CLEC16A	C-type lectin domain family 16, member A [Source:HGNC Symbol;Acc:29013]
540	ENSG00000038945	345.68	0.972051	0.231367	4.20135	2.65e-05	0.000710804	chr8	15965387	16424999	7812	-	35.52	p22	protein_coding	MSR1	macrophage scavenger receptor 1 [Source:HGNC Symbol;Acc:7376]
541	ENSG00000039068	12.2969	-0.0803619	0.707708	-0.113552	0.909593	0.961157	chr16	68771128	68869451	6154	+	46.89	q22.1	protein_coding	CDH1	cadherin 1, type 1, E-cadherin (epithelial) [Source:HGNC Symbol;Acc:1748]
542	ENSG00000039123	7979.14	-0.1355	0.0677568	-1.99981	0.0455213	0.167512	chr5	54603588	54721409	6578	+	36.85	q11.2	protein_coding	SKIV2L2	superkiller viralicidic activity 2-like 2 (S. cerevisiae) [Source:HGNC Symbol;Acc:18734]
543	ENSG00000039139	81.2544	0.229421	0.445734	0.514704	0.60676	0.79622	chr5	13690440	13944652	16475	-	38.97	p15.2	protein_coding	DNAH5	dynein, axonemal, heavy chain 5 [Source:HGNC Symbol;Acc:2950]
544	ENSG00000039319	6623.16	0.322023	0.130275	2.47187	0.0134407	0.0725391	chr5	79703832	79775169	11461	+	37.65	q14.1	protein_coding	ZFYVE16	zinc finger, FYVE domain containing 16 [Source:HGNC Symbol;Acc:20756]
545	ENSG00000039523	2549.19	-0.257151	0.158491	-1.6225	0.104697	0.287301	chr16	67552321	67580691	6730	+	57.05	q22.1	protein_coding	FAM65A	family with sequence similarity 65, member A [Source:HGNC Symbol;Acc:25836]
546	ENSG00000039537	98.8467	1.36436	0.343578	3.97104	7.16e-05	0.00154446	chr5	41142336	41261540	4739	-	36.68	p13.1	protein_coding	C6	complement component 6 [Source:HGNC Symbol;Acc:1339]
547	ENSG00000039560	632.088	0.583664	0.232353	2.51197	0.0120061	0.0669341	chr5	34656342	34832732	7702	+	42.13	p13.2	protein_coding	RAI14	retinoic acid induced 14 [Source:HGNC Symbol;Acc:14873]
548	ENSG00000039600	4.26354	0.770251	0.779286	0.988406	0.322954	0.571082	chr5	157052687	157098488	3471	-	40.71	q33.3	protein_coding	SOX30	SRY (sex determining region Y)-box 30 [Source:HGNC Symbol;Acc:30635]
549	ENSG00000039650	869.608	0.166083	0.145426	1.14205	0.253434	0.495869	chr19	50364461	50371166	3531	-	59.9	q13.33	protein_coding	PNKP	polynucleotide kinase 3'-phosphatase [Source:HGNC Symbol;Acc:9154]
550	ENSG00000039987	24.2574	-0.162297	0.476325	-0.340728	0.733308	0.873001	chr19	12862516	12869272	2646	+	57.95	p13.2	protein_coding	BEST2	bestrophin 2 [Source:HGNC Symbol;Acc:17107]
551	ENSG00000040199	1201.14	0.757698	0.183074	4.13875	3.49e-05	0.000876126	chr16	71671738	71758604	12493	-	41.82	q22.2	protein_coding	PHLPP2	PH domain and leucine rich repeat protein phosphatase 2 [Source:HGNC Symbol;Acc:29149]
552	ENSG00000040275	418.177	0.0446955	0.145444	0.307305	0.758611	0.886636	chr5	169010638	169031782	4777	+	37.28	q35.1	protein_coding	SPDL1	spindle apparatus coiled-coil protein 1 [Source:HGNC Symbol;Acc:26010]
553	ENSG00000040341	9116.77	-0.235184	0.208739	-1.12669	0.259874	0.502761	chr8	74332604	74659943	8998	-	38.25	q21.11	protein_coding	STAU2	staufen double-stranded RNA binding protein 2 [Source:HGNC Symbol;Acc:11371]
554	ENSG00000040487	572.45	0.190954	0.154764	1.23384	0.217264	0.452908	chr1	19638820	19655794	2686	+	54.93	p36.13	protein_coding	PQLC2	PQ loop repeat containing 2 [Source:HGNC Symbol;Acc:26001]
555	ENSG00000040531	1201.4	0.377598	0.0911706	4.14167	3.45e-05	0.000866265	chr17	3539762	3564836	3398	+	54.27	p13.2	protein_coding	CTNS	cystinosin, lysosomal cystine transporter [Source:HGNC Symbol;Acc:2518]
556	ENSG00000040608	55.8512	1.21003	0.294456	4.10936	3.97e-05	0.000968408	chr22	20228938	20270769	3339	-	60.45	q11.21	protein_coding	RTN4R	reticulon 4 receptor [Source:HGNC Symbol;Acc:18601]
557	ENSG00000040633	868.141	-0.157731	0.174912	-0.901776	0.367176	0.613175	chr17	7138347	7143041	2783	-	59.51	p13.1	protein_coding	PHF23	PHD finger protein 23 [Source:HGNC Symbol;Acc:28428]
558	ENSG00000040731	9.73277	-0.784187	0.590332	-1.32838	0.184051	0.409512	chr5	24487209	24645087	3660	-	34	p14.1	protein_coding	CDH10	cadherin 10, type 2 (T2-cadherin) [Source:HGNC Symbol;Acc:1749]
559	ENSG00000040933	3250.83	-0.0506077	0.129846	-0.389752	0.69672	0.85243	chr2	99061317	99210853	13202	+	47.33	q11.2	protein_coding	INPP4A	inositol polyphosphate-4-phosphatase, type I, 107kDa [Source:HGNC Symbol;Acc:6074]
560	ENSG00000041353	80.5608	0.100448	0.399811	0.25124	0.801629	0.910112	chr18	52385091	52562747	7432	+	37.74	q21.2	protein_coding	RAB27B	RAB27B, member RAS oncogene family [Source:HGNC Symbol;Acc:9767]
561	ENSG00000041357	4646.94	-0.34186	0.109687	-3.11669	0.00182894	0.0172663	chr15	78832747	78841604	3839	+	42.14	q25.1	protein_coding	PSMA4	proteasome (prosome, macropain) subunit, alpha type, 4 [Source:HGNC Symbol;Acc:9533]
562	ENSG00000041515	51.3331	-0.654223	0.755793	-0.865611	0.386703	0.630995	chr13	109248500	109860355	8994	+	38.48	q33.3	protein_coding	MYO16	myosin XVI [Source:HGNC Symbol;Acc:29822]
563	ENSG00000041802	2816.42	-0.209926	0.103078	-2.03656	0.0416937	0.157978	chr3	194361517	194393206	4818	-	41.69	q29	protein_coding	LSG1	large 60S subunit nuclear export GTPase 1 [Source:HGNC Symbol;Acc:25652]
564	ENSG00000041880	1079.08	-0.388819	0.19152	-2.03017	0.0423389	0.159505	chr3	51976361	51982883	2928	+	59.19	p21.2	protein_coding	PARP3	poly (ADP-ribose) polymerase family, member 3 [Source:HGNC Symbol;Acc:273]
565	ENSG00000041982	1850.87	1.43311	0.441423	3.24656	0.00116807	0.0124925	chr9	117782806	117880536	8687	-	41.86	q33.1	protein_coding	TNC	tenascin C [Source:HGNC Symbol;Acc:5318]
566	ENSG00000041988	1823.56	-0.243605	0.098117	-2.48281	0.0130352	0.0709718	chr1	6684926	6695646	4072	+	56.77	p36.31	protein_coding	THAP3	THAP domain containing, apoptosis associated protein 3 [Source:HGNC Symbol;Acc:20855]
567	ENSG00000042062	1277.76	-0.442449	0.166372	-2.65939	0.00782824	0.0495259	chr20	49202645	49308065	6009	-	51.6	q13.13	protein_coding	FAM65C	family with sequence similarity 65, member C [Source:HGNC Symbol;Acc:16168]
568	ENSG00000042088	406.903	0.484831	0.168113	2.88396	0.00392703	0.0300545	chr14	90421283	90511106	6221	+	42.14	q32.11	protein_coding	TDP1	tyrosyl-DNA phosphodiesterase 1 [Source:HGNC Symbol;Acc:18884]
569	ENSG00000042286	886.873	-0.10982	0.169113	-0.64939	0.516087	0.734571	chr10	71857979	71892690	5131	-	50.25	q22.1	protein_coding	AIFM2	apoptosis-inducing factor, mitochondrion-associated, 2 [Source:HGNC Symbol;Acc:21411]
570	ENSG00000042317	1060.97	-0.0412501	0.12873	-0.320438	0.748636	0.881731	chr14	88851268	88936694	6872	+	37.9	q31.3	protein_coding	SPATA7	spermatogenesis associated 7 [Source:HGNC Symbol;Acc:20423]
571	ENSG00000042429	1566.78	0.0958083	0.0831004	1.15292	0.248942	0.49076	chr11	93517393	93547861	10773	+	39.81	q21	protein_coding	MED17	mediator complex subunit 17 [Source:HGNC Symbol;Acc:2375]
572	ENSG00000042445	6248.05	-0.246133	0.332912	-0.739334	0.459704	0.69196	chr2	85569211	85581743	4264	-	51.7	p11.2	protein_coding	RETSAT	retinol saturase (all-trans-retinol 13,14-reductase) [Source:HGNC Symbol;Acc:25991]
573	ENSG00000042493	334.262	-0.0762791	0.362527	-0.210409	0.833348	0.926206	chr2	85621871	85645555	2607	-	51.32	p11.2	protein_coding	CAPG	capping protein (actin filament), gelsolin-like [Source:HGNC Symbol;Acc:1474]
574	ENSG00000042753	1590.03	-0.166096	0.122182	-1.35941	0.174016	0.396451	chr19	47341393	47354249	1704	-	52.87	q13.32	protein_coding	AP2S1	adaptor-related protein complex 2, sigma 1 subunit [Source:HGNC Symbol;Acc:565]
575	ENSG00000042781	229.318	0.136413	0.180543	0.755574	0.449905	0.684918	chr1	215796236	216596738	20584	-	36.36	q41	protein_coding	USH2A	Usher syndrome 2A (autosomal recessive, mild) [Source:HGNC Symbol;Acc:12601]
576	ENSG00000042832	75.6838	0.0191193	0.473035	0.0404184	0.96776	0.985956	chr8	133879203	134147147	11132	+	45.9	q24.22	protein_coding	TG	thyroglobulin [Source:HGNC Symbol;Acc:11764]
577	ENSG00000042980	192.521	1.14815	0.375209	3.06002	0.00221325	0.0197638	chr8	24151553	24216531	9351	+	35.71	p21.2	protein_coding	ADAM28	ADAM metallopeptidase domain 28 [Source:HGNC Symbol;Acc:206]
578	ENSG00000043093	5830.96	0.113175	0.168041	0.673497	0.500631	0.724063	chr3	182655862	182703741	8412	-	39.56	q27.1	protein_coding	DCUN1D1	DCN1, defective in cullin neddylation 1, domain containing 1 [Source:HGNC Symbol;Acc:18184]
579	ENSG00000043143	2261.13	-0.914862	0.259377	-3.52714	0.000420067	0.00588061	chr5	133860003	133918918	9873	+	53.79	q31.1	protein_coding	JADE2	jade family PHD finger 2 [Source:HGNC Symbol;Acc:22984]
580	ENSG00000043462	369.611	0.455927	0.212739	2.14313	0.0321029	0.131849	chr5	169673241	169725231	7231	-	44.64	q35.1	protein_coding	LCP2	lymphocyte cytosolic protein 2 (SH2 domain containing leukocyte protein of 76kDa) [Source:HGNC Symbol;Acc:6529]
581	ENSG00000043514	935.651	-0.0774894	0.170586	-0.454255	0.649645	0.823279	chr1	40306723	40349183	3054	-	42.46	p34.2	protein_coding	TRIT1	tRNA isopentenyltransferase 1 [Source:HGNC Symbol;Acc:20286]
582	ENSG00000043591	33.3604	0.16768	0.292673	0.572925	0.566696	0.770427	chr10	115803806	115806667	2862	+	57.51	q25.3	protein_coding	ADRB1	adrenoceptor beta 1 [Source:HGNC Symbol;Acc:285]
583	ENSG00000044090	3487.94	0.310271	0.127918	2.42555	0.0152851	0.0794002	chr6	43005355	43021683	5628	-	54.7	p21.1	protein_coding	CUL7	cullin 7 [Source:HGNC Symbol;Acc:21024]
584	ENSG00000044115	11227.6	-0.0960963	0.112842	-0.851599	0.394437	0.637652	chr5	137946656	138270723	8830	+	44.15	q31.2	protein_coding	CTNNA1	catenin (cadherin-associated protein), alpha 1, 102kDa [Source:HGNC Symbol;Acc:2509]
585	ENSG00000044446	2344.26	0.208805	0.155005	1.34709	0.177952	0.401352	chrX	18910418	19002716	9029	-	45.75	p22.13	protein_coding	PHKA2	phosphorylase kinase, alpha 2 (liver) [Source:HGNC Symbol;Acc:8926]
586	ENSG00000044459	1078.62	-0.411951	0.234592	-1.75603	0.0790831	0.240139	chr9	17134980	17503921	11167	+	36.43	p22.2	protein_coding	CNTLN	centlein, centrosomal protein [Source:HGNC Symbol;Acc:23432]
587	ENSG00000044524	572.846	1.05782	0.262751	4.02594	5.67e-05	0.00128569	chr3	89156674	89531284	6674	+	34.6	p11.1	protein_coding	EPHA3	EPH receptor A3 [Source:HGNC Symbol;Acc:3387]
588	ENSG00000044574	4738.3	-0.116782	0.236397	-0.494008	0.621301	0.805084	chr9	127997132	128003609	3908	-	43.98	q33.3	protein_coding	HSPA5	heat shock 70kDa protein 5 (glucose-regulated protein, 78kDa) [Source:HGNC Symbol;Acc:5238]
589	ENSG00000046604	283.754	-0.462077	0.294555	-1.56873	0.11671	0.307529	chr18	29078006	29128971	6190	+	39.27	q12.1	protein_coding	DSG2	desmoglein 2 [Source:HGNC Symbol;Acc:3049]
590	ENSG00000046647	421.605	0.223274	0.157522	1.41741	0.156362	0.370624	chrX	14026398	14048012	2424	-	40.79	p22.2	protein_coding	GEMIN8	gem (nuclear organelle) associated protein 8 [Source:HGNC Symbol;Acc:26044]
591	ENSG00000046651	1707.03	0.299924	0.0974696	3.0771	0.00209026	0.0189381	chrX	13752832	13787480	5212	+	39.8	p22.2	protein_coding	OFD1	oral-facial-digital syndrome 1 [Source:HGNC Symbol;Acc:2567]
592	ENSG00000046653	688.431	0.472765	0.181655	2.60254	0.0092535	0.0555704	chrX	13789150	13956757	5675	-	41.5	p22.2	protein_coding	GPM6B	glycoprotein M6B [Source:HGNC Symbol;Acc:4461]
593	ENSG00000046889	3117.43	0.0966681	0.143068	0.675678	0.499245	0.723014	chr8	68864353	69149265	12058	+	37.16	q13.2	protein_coding	PREX2	phosphatidylinositol-3,4,5-trisphosphate-dependent Rac exchange factor 2 [Source:HGNC Symbol;Acc:22950]
594	ENSG00000047056	3063.41	-0.304623	0.150583	-2.02296	0.0430773	0.161424	chr10	1095478	1178237	5656	+	45.5	p15.3	protein_coding	WDR37	WD repeat domain 37 [Source:HGNC Symbol;Acc:31406]
595	ENSG00000047188	5302.07	0.0319735	0.0876119	0.364945	0.715153	0.863451	chr5	112849380	112930982	10816	+	34.67	q22.2	protein_coding	YTHDC2	YTH domain containing 2 [Source:HGNC Symbol;Acc:24721]
596	ENSG00000047230	1077.55	-0.294445	0.129818	-2.26814	0.0233206	0.105951	chrX	16606126	16731059	5510	-	43.51	p22.2	protein_coding	CTPS2	CTP synthase 2 [Source:HGNC Symbol;Acc:2520]
597	ENSG00000047249	2534.75	-0.145007	0.133331	-1.08757	0.276783	0.521695	chr8	54628117	54756118	5090	-	39.2	q11.23	protein_coding	ATP6V1H	ATPase, H+ transporting, lysosomal 50/57kDa, V1 subunit H [Source:HGNC Symbol;Acc:18303]
598	ENSG00000047315	10434.2	-0.0328184	0.0890646	-0.368478	0.712517	0.862144	chr4	57843888	57897334	5901	+	40.19	q12	protein_coding	POLR2B	polymerase (RNA) II (DNA directed) polypeptide B, 140kDa [Source:HGNC Symbol;Acc:9188]
599	ENSG00000047346	9839.06	0.161144	0.252805	0.637427	0.523847	0.74084	chr15	52873514	53002014	7755	-	37.21	q21.3	protein_coding	FAM214A	family with sequence similarity 214, member A [Source:HGNC Symbol;Acc:25609]
600	ENSG00000047365	548.994	0.155263	0.225227	0.689361	0.490596	0.717127	chr4	35949843	36246131	12428	-	35.53	p14	protein_coding	ARAP2	ArfGAP with RhoGAP domain, ankyrin repeat and PH domain 2 [Source:HGNC Symbol;Acc:16924]
601	ENSG00000047410	16635.8	0.1743	0.0778982	2.23753	0.0252517	0.111734	chr1	186280784	186344825	12350	-	34.16	q31.1	protein_coding	TPR	translocated promoter region, nuclear basket protein [Source:HGNC Symbol;Acc:12017]
602	ENSG00000047457	413.842	0.855128	0.317281	2.69517	0.00703519	0.0456551	chr3	148880197	148939842	7296	-	37.35	q25.1	protein_coding	CP	ceruloplasmin (ferroxidase) [Source:HGNC Symbol;Acc:2295]
603	ENSG00000047578	848.684	0.0518692	0.184579	0.281014	0.7787	0.897756	chr16	27561454	27791690	9692	+	47.84	p12.1	protein_coding	KIAA0556	KIAA0556 [Source:HGNC Symbol;Acc:29068]
604	ENSG00000047579	505.102	-0.788918	0.268485	-2.93841	0.00329901	0.0265115	chr6	15523032	15663289	3078	-	39.93	p22.3	protein_coding	DTNBP1	dystrobrevin binding protein 1 [Source:HGNC Symbol;Acc:17328]
605	ENSG00000047597	1352.52	-0.236997	0.211019	-1.12311	0.261392	0.504396	chrX	37545012	37591383	5206	+	39.54	p21.1	protein_coding	XK	X-linked Kx blood group (McLeod syndrome) [Source:HGNC Symbol;Acc:12811]
606	ENSG00000047617	901.737	-0.268531	0.244653	-1.0976	0.272379	0.516995	chr12	5641035	6055398	6012	-	44.4	p13.31	protein_coding	ANO2	anoctamin 2 [Source:HGNC Symbol;Acc:1183]
607	ENSG00000047621	1770.63	-0.0422013	0.1141	-0.369861	0.711486	0.861552	chr12	4596894	4647674	4939	-	36.55	p13.32	protein_coding	C12orf4	chromosome 12 open reading frame 4 [Source:HGNC Symbol;Acc:1184]
608	ENSG00000047634	1933.26	0.0697574	0.132228	0.527553	0.597809	0.790618	chrX	17755588	17773105	5475	+	38.87	p22.13	protein_coding	SCML1	sex comb on midleg-like 1 (Drosophila) [Source:HGNC Symbol;Acc:10580]
609	ENSG00000047644	2358.42	0.31474	0.106298	2.96093	0.00306713	0.0252051	chrX	9983602	10112518	7114	+	46.21	p22.2	protein_coding	WWC3	WWC family member 3 [Source:HGNC Symbol;Acc:29237]
610	ENSG00000047648	1774.96	-0.684093	0.265716	-2.57452	0.0100378	0.0589908	chrX	11136239	11683821	8357	-	39.22	p22.2	protein_coding	ARHGAP6	Rho GTPase activating protein 6 [Source:HGNC Symbol;Acc:676]
611	ENSG00000047662	4325.27	-0.310946	0.262168	-1.18606	0.235599	0.474363	chr4	17630929	17783135	6622	-	44.05	p15.32	protein_coding	FAM184B	family with sequence similarity 184, member B [Source:HGNC Symbol;Acc:29235]
612	ENSG00000047849	190653	-0.099583	0.153064	-0.650598	0.515306	0.734103	chr3	47892182	48130769	14901	-	43.44	p21.31	protein_coding	MAP4	microtubule-associated protein 4 [Source:HGNC Symbol;Acc:6862]
613	ENSG00000047932	3764.45	0.285614	0.0849554	3.36193	0.000773993	0.00930706	chr6	117639374	117923691	5025	-	38.21	q22.1	protein_coding	GOPC	golgi-associated PDZ and coiled-coil motif containing [Source:HGNC Symbol;Acc:17643]
614	ENSG00000047936	732.798	0.164861	0.556163	0.296426	0.766905	0.891417	chr6	117609463	117747018	7856	-	37.24	q22.1	protein_coding	ROS1	c-ros oncogene 1 , receptor tyrosine kinase [Source:HGNC Symbol;Acc:10261]
615	ENSG00000048028	9048.73	-0.389307	0.181946	-2.13969	0.0323797	0.132604	chr11	113668596	113746292	5719	-	41.45	q23.2	protein_coding	USP28	ubiquitin specific peptidase 28 [Source:HGNC Symbol;Acc:12625]
616	ENSG00000048052	4162.91	-0.47705	0.191922	-2.48564	0.0129317	0.0705674	chr7	18126572	19042039	16827	+	36.13	p21.1	protein_coding	HDAC9	histone deacetylase 9 [Source:HGNC Symbol;Acc:14065]
617	ENSG00000048140	2021.8	-0.321715	0.163218	-1.97107	0.048716	0.175285	chr5	176074388	176086058	5218	+	58.7	q35.2	protein_coding	TSPAN17	tetraspanin 17 [Source:HGNC Symbol;Acc:13594]
618	ENSG00000048162	2680.33	-0.30385	0.117239	-2.59172	0.00954978	0.0569033	chr5	175810949	175815976	2852	-	49.32	q35.2	protein_coding	NOP16	NOP16 nucleolar protein [Source:HGNC Symbol;Acc:26934]
619	ENSG00000048342	1295.96	0.198193	0.185349	1.0693	0.284936	0.530695	chr4	15471489	15603180	7570	+	40.21	p15.32	protein_coding	CC2D2A	coiled-coil and C2 domain containing 2A [Source:HGNC Symbol;Acc:29253]
620	ENSG00000048392	7302.93	0.133138	0.150685	0.88355	0.376939	0.622202	chr8	103216730	103251346	5548	-	37.99	q22.3	protein_coding	RRM2B	ribonucleotide reductase M2 B (TP53 inducible) [Source:HGNC Symbol;Acc:17296]
621	ENSG00000048405	2282.35	0.379454	0.115995	3.27129	0.00107058	0.0117181	chr7	126986844	127071978	5793	-	37.8	q31.33	protein_coding	ZNF800	zinc finger protein 800 [Source:HGNC Symbol;Acc:27267]
622	ENSG00000048462	18.5177	-0.713917	0.743144	-0.96067	0.336718	0.584533	chr16	12058964	12061925	1118	+	40.48	p13.13	protein_coding	TNFRSF17	tumor necrosis factor receptor superfamily, member 17 [Source:HGNC Symbol;Acc:11913]
623	ENSG00000048471	2875.8	0.0704509	0.117113	0.601566	0.547463	0.757659	chr16	12070594	12668146	11298	+	47.13	p13.13	protein_coding	SNX29	sorting nexin 29 [Source:HGNC Symbol;Acc:30542]
624	ENSG00000048540	146.283	0.64136	0.384891	1.66634	0.0956457	0.271191	chr12	16701307	16763528	10268	-	35.63	p12.3	protein_coding	LMO3	LIM domain only 3 (rhombotin-like 2) [Source:HGNC Symbol;Acc:6643]
625	ENSG00000048544	5356.44	-0.112647	0.15919	-0.707629	0.479176	0.707971	chr6	42174539	42185603	2110	-	41.04	p21.1	protein_coding	MRPS10	mitochondrial ribosomal protein S10 [Source:HGNC Symbol;Acc:14502]
626	ENSG00000048649	5355.24	-0.0398458	0.0815025	-0.488891	0.624919	0.807185	chr11	77371041	77532063	15740	-	39.04	q14.1	protein_coding	RSF1	remodeling and spacing factor 1 [Source:HGNC Symbol;Acc:18118]
627	ENSG00000048707	26244.4	-0.555283	0.106267	-5.22536	1.74e-07	1.22e-05	chr1	12290124	12572099	20346	+	42.33	p36.22	protein_coding	VPS13D	vacuolar protein sorting 13 homolog D (S. cerevisiae) [Source:HGNC Symbol;Acc:23595]
628	ENSG00000048740	4564.95	0.786195	0.179533	4.37912	1.19e-05	0.000376728	chr10	11047259	11378674	9873	+	42.7	p14	protein_coding	CELF2	CUGBP, Elav-like family member 2 [Source:HGNC Symbol;Acc:2550]
629	ENSG00000048828	13878.1	-0.0853529	0.119893	-0.71191	0.47652	0.705641	chr9	96214004	96328397	7296	+	42.4	q22.31	protein_coding	FAM120A	family with sequence similarity 120A [Source:HGNC Symbol;Acc:13247]
630	ENSG00000048991	3535.1	-0.567272	0.176645	-3.21137	0.00132102	0.0136143	chr2	136289025	136482840	7898	+	37.98	q21.3	protein_coding	R3HDM1	R3H domain containing 1 [Source:HGNC Symbol;Acc:9757]
631	ENSG00000049089	42.2236	-0.112213	0.334613	-0.335351	0.737361	0.87545	chr1	40766159	40783488	4151	-	57.43	p34.2	protein_coding	COL9A2	collagen, type IX, alpha 2 [Source:HGNC Symbol;Acc:2218]
632	ENSG00000049130	1857.09	0.046898	0.202914	0.231123	0.817219	0.918035	chr12	88886570	88974628	6030	-	36.84	q21.32	protein_coding	KITLG	KIT ligand [Source:HGNC Symbol;Acc:6343]
633	ENSG00000049167	871.464	-0.0534958	0.125199	-0.427286	0.669171	0.835285	chr5	60169658	60240900	4847	-	37.16	q12.1	protein_coding	ERCC8	excision repair cross-complementing rodent repair deficiency, complementation group 8 [Source:HGNC Symbol;Acc:3439]
634	ENSG00000049192	157.719	0.153253	0.287886	0.53234	0.594491	0.788694	chr5	64444563	64777747	8567	-	35.91	q12.3	protein_coding	ADAMTS6	ADAM metallopeptidase with thrombospondin type 1 motif, 6 [Source:HGNC Symbol;Acc:222]
635	ENSG00000049239	13329.5	-1.04759	0.165371	-6.3348	2.38e-10	3.92e-08	chr1	9294834	9331396	9321	+	52.29	p36.22	protein_coding	H6PD	hexose-6-phosphate dehydrogenase (glucose 1-dehydrogenase) [Source:HGNC Symbol;Acc:4795]
636	ENSG00000049245	4487.08	-0.0442729	0.112423	-0.393806	0.693724	0.850493	chr1	7831329	7841492	2760	+	42.77	p36.23	protein_coding	VAMP3	vesicle-associated membrane protein 3 [Source:HGNC Symbol;Acc:12644]
637	ENSG00000049246	4465.3	-0.13247	0.363913	-0.364016	0.715846	0.863875	chr1	7844380	7905237	8059	+	40.53	p36.23	protein_coding	PER3	period circadian clock 3 [Source:HGNC Symbol;Acc:8847]
638	ENSG00000049247	665.098	-0.169124	0.346316	-0.488351	0.625301	0.807505	chr1	7903143	7913572	1783	-	40.81	p36.23	protein_coding	UTS2	urotensin 2 [Source:HGNC Symbol;Acc:12636]
639	ENSG00000049249	8.06924	0.234577	0.47991	0.488793	0.624989	0.807201	chr1	7979907	8000926	2284	-	43.31	p36.23	protein_coding	TNFRSF9	tumor necrosis factor receptor superfamily, member 9 [Source:HGNC Symbol;Acc:11924]
640	ENSG00000049283	117.773	0.365248	0.335583	1.0884	0.276419	0.521532	chr17	48609904	48621111	4642	+	58.71	q21.33	protein_coding	EPN3	epsin 3 [Source:HGNC Symbol;Acc:18235]
641	ENSG00000049319	35.2104	0.810073	0.465808	1.73907	0.0820224	0.245896	chr2	31747550	31806136	4647	-	39.1	p23.1	processed_transcript	SRD5A2	steroid-5-alpha-reductase, alpha polypeptide 2 (3-oxo-5 alpha-steroid delta 4-dehydrogenase alpha 2) [Source:HGNC Symbol;Acc:11285]
642	ENSG00000049323	4846.31	0.769498	0.105571	7.28892	3.12e-13	9.17e-11	chr2	33172039	33624576	7329	+	40.25	p22.3	protein_coding	LTBP1	latent transforming growth factor beta binding protein 1 [Source:HGNC Symbol;Acc:6714]
643	ENSG00000049449	2853.56	0.190125	0.102736	1.85062	0.0642246	0.209604	chr11	31833939	32127301	7225	+	43.38	p13	protein_coding	RCN1	reticulocalbin 1, EF-hand calcium binding domain [Source:HGNC Symbol;Acc:9934]
644	ENSG00000049540	6492.21	2.81204	0.323642	8.68876	3.66e-18	2.64e-15	chr7	73442119	73484237	6542	+	54.95	q11.23	protein_coding	ELN	elastin [Source:HGNC Symbol;Acc:3327]
645	ENSG00000049541	778.952	0.0617942	0.135163	0.457181	0.647541	0.821742	chr7	73645829	73668774	2197	-	48.95	q11.23	protein_coding	RFC2	replication factor C (activator 1) 2, 40kDa [Source:HGNC Symbol;Acc:9970]
646	ENSG00000049618	8514.38	-0.372104	0.1177	-3.16147	0.00156977	0.0153931	chr6	157099063	157531913	16334	+	40.83	q25.3	protein_coding	ARID1B	AT rich interactive domain 1B (SWI1-like) [Source:HGNC Symbol;Acc:18040]
647	ENSG00000049656	1504.88	0.0934315	0.143606	0.65061	0.515298	0.734103	chr5	1317859	1345214	6557	-	56.17	p15.33	protein_coding	CLPTM1L	CLPTM1-like [Source:HGNC Symbol;Acc:24308]
648	ENSG00000049759	5622.83	-0.223556	0.178158	-1.25481	0.209547	0.4431	chr18	55711599	56068772	15717	+	43.36	q21.31	protein_coding	NEDD4L	neural precursor cell expressed, developmentally down-regulated 4-like, E3 ubiquitin protein ligase [Source:HGNC Symbol;Acc:7728]
649	ENSG00000049768	89.3381	-0.0549361	0.176843	-0.31065	0.756067	0.885159	chrX	49106897	49121288	2578	-	53.48	p11.23	protein_coding	FOXP3	forkhead box P3 [Source:HGNC Symbol;Acc:6106]
650	ENSG00000049769	1912.26	-0.348918	0.146976	-2.37398	0.0175976	0.0873879	chrX	49126306	49157929	4162	+	47.82	p11.23	protein_coding	PPP1R3F	protein phosphatase 1, regulatory subunit 3F [Source:HGNC Symbol;Acc:14944]
651	ENSG00000049860	2443.16	0.00254105	0.135297	0.0187813	0.985016	0.993016	chr5	73935848	74018472	5067	+	42.11	q13.3	protein_coding	HEXB	hexosaminidase B (beta polypeptide) [Source:HGNC Symbol;Acc:4879]
652	ENSG00000049883	1030.42	0.00819987	0.173855	0.0471651	0.962382	0.983206	chr5	71616194	71656052	3637	+	40.04	q13.2	protein_coding	PTCD2	pentatricopeptide repeat domain 2 [Source:HGNC Symbol;Acc:25734]
653	ENSG00000050030	65.3594	0.100354	0.29822	0.33651	0.736487	0.874845	chrX	73952684	74145282	11719	-	39.49	q13.3	protein_coding	KIAA2022	KIAA2022 [Source:HGNC Symbol;Acc:29433]
654	ENSG00000050130	1647.46	0.0471066	0.115548	0.407682	0.683507	0.844334	chr14	59951161	59972128	4350	+	36.78	q23.1	protein_coding	JKAMP	JNK1/MAPK8-associated membrane protein [Source:HGNC Symbol;Acc:20184]
655	ENSG00000050165	939.124	0.703151	0.262115	2.68261	0.00730508	0.0469745	chr11	11984653	12031316	5059	-	49.18	p15.3	protein_coding	DKK3	dickkopf WNT signaling pathway inhibitor 3 [Source:HGNC Symbol;Acc:2893]
656	ENSG00000050327	210.073	0.0784065	0.297646	0.263422	0.792226	0.905077	chr7	144052381	144077725	5818	+	48.06	q35	protein_coding	ARHGEF5	Rho guanine nucleotide exchange factor (GEF) 5 [Source:HGNC Symbol;Acc:13209]
657	ENSG00000050344	2652.29	0.0984712	0.130657	0.753661	0.451053	0.685708	chr7	26191860	26226745	4249	+	44.64	p15.2	protein_coding	NFE2L3	nuclear factor, erythroid 2-like 3 [Source:HGNC Symbol;Acc:7783]
658	ENSG00000050393	1464.59	-0.300074	0.13524	-2.21883	0.0264983	0.115501	chr6	13786789	13814800	6057	-	41.24	p23	protein_coding	MCUR1	mitochondrial calcium uniporter regulator 1 [Source:HGNC Symbol;Acc:21097]
659	ENSG00000050405	5652.12	0.714092	0.130844	5.45759	4.83e-08	4.1e-06	chr12	50569571	50677329	6317	-	42.32	q13.12	protein_coding	LIMA1	LIM domain and actin binding 1 [Source:HGNC Symbol;Acc:24636]
660	ENSG00000050426	2562.58	0.68426	0.170761	4.00712	6.15e-05	0.00137096	chr12	51441745	51454207	4400	+	45.34	q13.12	protein_coding	LETMD1	LETM1 domain containing 1 [Source:HGNC Symbol;Acc:24241]
661	ENSG00000050438	48.4759	0.363116	0.278908	1.30192	0.192944	0.421853	chr12	51785101	51902980	11415	+	42.58	q13.13	protein_coding	SLC4A8	solute carrier family 4, sodium bicarbonate cotransporter, member 8 [Source:HGNC Symbol;Acc:11034]
662	ENSG00000050555	36.015	1.26804	0.631256	2.00875	0.0445636	0.165153	chr9	133884469	133969860	7594	+	53.69	q34.12	protein_coding	LAMC3	laminin, gamma 3 [Source:HGNC Symbol;Acc:6494]
663	ENSG00000050628	118.38	1.1202	0.517383	2.16512	0.0303784	0.126881	chr1	71318036	71513491	9882	-	38.05	p31.1	protein_coding	PTGER3	prostaglandin E receptor 3 (subtype EP3) [Source:HGNC Symbol;Acc:9595]
664	ENSG00000050730	4.84197	0.169395	0.765786	0.221205	0.824933	0.922094	chr4	122052563	122148621	3768	-	37.14	q27	protein_coding	TNIP3	TNFAIP3 interacting protein 3 [Source:HGNC Symbol;Acc:19315]
665	ENSG00000050748	4105.63	-0.211183	0.166563	-1.26789	0.204837	0.437335	chr5	179660143	179719099	8955	-	43.58	q35.3	protein_coding	MAPK9	mitogen-activated protein kinase 9 [Source:HGNC Symbol;Acc:6886]
666	ENSG00000050767	123.763	0.589792	0.450285	1.30982	0.190257	0.418148	chr5	177664619	178017556	3878	-	50.62	q35.3	protein_coding	COL23A1	collagen, type XXIII, alpha 1 [Source:HGNC Symbol;Acc:22990]
667	ENSG00000050820	4581.41	-0.502675	0.132264	-3.80054	0.00014438	0.00262613	chr16	75262928	75301951	8335	-	59.64	q23.1	protein_coding	BCAR1	breast cancer anti-estrogen resistance 1 [Source:HGNC Symbol;Acc:971]
668	ENSG00000051009	1438.4	-0.00344101	0.109587	-0.0313998	0.974951	0.988771	chr11	6232565	6255941	4736	-	44.55	p15.4	protein_coding	FAM160A2	family with sequence similarity 160, member A2 [Source:HGNC Symbol;Acc:25378]
669	ENSG00000051108	5507.14	-0.362934	0.11743	-3.09065	0.00199721	0.0183868	chr16	56965960	56977798	4178	+	43.09	q13	protein_coding	HERPUD1	homocysteine-inducible, endoplasmic reticulum stress-inducible, ubiquitin-like domain member 1 [Source:HGNC Symbol;Acc:13744]
670	ENSG00000051128	2800.37	0.556912	0.307821	1.80921	0.0704189	0.222846	chr19	19040010	19052070	3422	-	56.77	p13.11	protein_coding	HOMER3	homer homolog 3 (Drosophila) [Source:HGNC Symbol;Acc:17514]
671	ENSG00000051180	127.453	0.104795	0.178314	0.587701	0.556733	0.764392	chr15	40986972	41024354	2863	+	43.5	q15.1	protein_coding	RAD51	RAD51 recombinase [Source:HGNC Symbol;Acc:9817]
672	ENSG00000051341	189.761	-0.174839	0.484914	-0.360557	0.71843	0.864856	chr3	121150278	121264853	9099	-	39.03	q13.33	protein_coding	POLQ	polymerase (DNA directed), theta [Source:HGNC Symbol;Acc:9186]
673	ENSG00000051382	3236.79	-0.949173	0.161395	-5.88104	4.08e-09	4.5e-07	chr3	138372860	138553780	6531	-	40.59	q22.3	protein_coding	PIK3CB	phosphatidylinositol-4,5-bisphosphate 3-kinase, catalytic subunit beta [Source:HGNC Symbol;Acc:8976]
674	ENSG00000051523	572.586	-0.150176	0.23802	-0.630941	0.528079	0.743785	chr16	88709691	88717560	3357	-	61.89	q24.3	protein_coding	CYBA	cytochrome b-245, alpha polypeptide [Source:HGNC Symbol;Acc:2577]
675	ENSG00000051596	954.784	-0.0732608	0.16435	-0.445761	0.65577	0.827009	chr5	175344876	175461683	3437	-	43.01	q35.2	protein_coding	THOC3	THO complex 3 [Source:HGNC Symbol;Acc:19072]
676	ENSG00000051620	5446.61	0.00394257	0.177806	0.0221734	0.98231	0.991765	chr6	138724668	138743334	10356	+	47.12	q23.3	protein_coding	HEBP2	heme binding protein 2 [Source:HGNC Symbol;Acc:15716]
677	ENSG00000051825	3159.5	0.0640975	0.120267	0.53296	0.594062	0.788436	chr12	123636867	123728561	10304	-	42.99	q24.31	protein_coding	MPHOSPH9	M-phase phosphoprotein 9 [Source:HGNC Symbol;Acc:7215]
678	ENSG00000052126	1180	1.32351	0.349171	3.79043	0.000150384	0.00271339	chr12	19282648	19529334	12596	+	38.1	p12.3	protein_coding	PLEKHA5	pleckstrin homology domain containing, family A member 5 [Source:HGNC Symbol;Acc:30036]
679	ENSG00000052344	85.5821	-0.296784	0.22452	-1.32186	0.186216	0.41249	chr16	31142756	31147083	3008	-	59.08	p11.2	protein_coding	PRSS8	protease, serine, 8 [Source:HGNC Symbol;Acc:9491]
680	ENSG00000052723	3262.83	0.172773	0.150713	1.14637	0.251643	0.493788	chr1	115312100	115323306	5894	-	36.9	p13.2	protein_coding	SIKE1	suppressor of IKBKE 1 [Source:HGNC Symbol;Acc:26119]
681	ENSG00000052749	4054.8	0.127073	0.312264	0.406942	0.684051	0.844582	chr10	99116115	99161127	6801	-	51.62	q24.1	protein_coding	RRP12	ribosomal RNA processing 12 homolog (S. cerevisiae) [Source:HGNC Symbol;Acc:29100]
682	ENSG00000052795	4099.27	-0.0825662	0.234214	-0.352525	0.724444	0.868286	chr4	159690290	159829201	10868	+	40.56	q32.1	protein_coding	FNIP2	folliculin interacting protein 2 [Source:HGNC Symbol;Acc:29280]
683	ENSG00000052802	511.914	0.191888	0.173421	1.10648	0.268518	0.512347	chr4	166248775	166264312	2892	+	37.1	q32.3	protein_coding	MSMO1	methylsterol monooxygenase 1 [Source:HGNC Symbol;Acc:10545]
684	ENSG00000052841	5728.15	-0.0903232	0.0620865	-1.4548	0.145726	0.354667	chr11	43380482	43516483	11284	+	37.89	p12	protein_coding	TTC17	tetratricopeptide repeat domain 17 [Source:HGNC Symbol;Acc:25596]
685	ENSG00000052850	371.573	-0.338035	0.421638	-0.801717	0.422716	0.66242	chr11	44281994	44331716	5750	-	52.84	p11.2	protein_coding	ALX4	ALX homeobox 4 [Source:HGNC Symbol;Acc:450]
686	ENSG00000053108	35.1148	-0.465971	0.567458	-0.821155	0.411558	0.653011	chr5	132532147	132948255	6733	-	46.69	q31.1	protein_coding	FSTL4	follistatin-like 4 [Source:HGNC Symbol;Acc:21389]
687	ENSG00000053254	20266.1	-0.228525	0.213114	-1.07232	0.283578	0.529014	chr14	89591215	90085493	11033	-	44.31	q32.11	protein_coding	FOXN3	forkhead box N3 [Source:HGNC Symbol;Acc:1928]
688	ENSG00000053328	28.8676	0.187568	0.362609	0.517274	0.604965	0.794905	chr6	110567131	110679475	1774	-	40.64	q21	protein_coding	METTL24	methyltransferase like 24 [Source:HGNC Symbol;Acc:21566]
689	ENSG00000053371	2037.13	-0.0645463	0.139022	-0.464288	0.642441	0.818794	chr1	19630459	19638640	1781	-	52.87	p36.13	protein_coding	AKR7A2	aldo-keto reductase family 7, member A2 (aflatoxin aldehyde reductase) [Source:HGNC Symbol;Acc:389]
690	ENSG00000053372	1327.37	0.199154	0.129962	1.5324	0.125423	0.321975	chr1	19578033	19586622	2822	+	53.49	p36.13	protein_coding	MRTO4	mRNA turnover 4 homolog (S. cerevisiae) [Source:HGNC Symbol;Acc:18477]
691	ENSG00000053438	1716.14	0.627215	0.189837	3.30396	0.000953302	0.0107282	chr20	36149617	36152092	1294	+	54.08	q11.23	protein_coding	NNAT	neuronatin [Source:HGNC Symbol;Acc:7860]
692	ENSG00000053501	555.169	-0.106604	0.130533	-0.81668	0.414112	0.655109	chr19	17326155	17330638	2431	+	55.26	p13.11	protein_coding	USE1	unconventional SNARE in the ER 1 homolog (S. cerevisiae) [Source:HGNC Symbol;Acc:30882]
693	ENSG00000053524	1906.58	0.93811	0.175082	5.35811	8.41e-08	6.51e-06	chr3	182895831	183146566	20568	-	42.39	q27.1	protein_coding	MCF2L2	MCF.2 cell line derived transforming sequence-like 2 [Source:HGNC Symbol;Acc:30319]
694	ENSG00000053702	812.356	-0.261697	0.119121	-2.19689	0.028028	0.120018	chr12	2934514	2944710	2803	-	51.39	p13.33	protein_coding	NRIP2	nuclear receptor interacting protein 2 [Source:HGNC Symbol;Acc:23078]
695	ENSG00000053747	1052.82	0.546966	0.215184	2.54185	0.0110266	0.0630207	chr18	21269407	21535030	13522	+	42.46	q11.2	protein_coding	LAMA3	laminin, alpha 3 [Source:HGNC Symbol;Acc:6483]
696	ENSG00000053770	3410.04	-0.263745	0.108041	-2.44115	0.0146405	0.0770645	chr14	57735627	57756797	4371	+	35.8	q22.3	protein_coding	AP5M1	adaptor-related protein complex 5, mu 1 subunit [Source:HGNC Symbol;Acc:20192]
697	ENSG00000053900	1997.4	0.068788	0.145091	0.474103	0.635426	0.81389	chr4	25378835	25420120	7494	+	37.97	p15.2	protein_coding	ANAPC4	anaphase promoting complex subunit 4 [Source:HGNC Symbol;Acc:19990]
698	ENSG00000053918	141.262	0.3751	0.196849	1.90552	0.0567128	0.193845	chr11	2465914	2870339	3971	+	51.55	p15.5	protein_coding	KCNQ1	potassium voltage-gated channel, KQT-like subfamily, member 1 [Source:HGNC Symbol;Acc:6294]
699	ENSG00000054116	1685.56	0.0948751	0.15727	0.603263	0.546334	0.756803	chr1	36602173	36615098	3313	-	47.19	p34.3	protein_coding	TRAPPC3	trafficking protein particle complex 3 [Source:HGNC Symbol;Acc:19942]
700	ENSG00000054118	16929.7	-0.210316	0.09362	-2.24648	0.024673	0.110003	chr1	36690017	36770958	4736	+	43.72	p34.3	protein_coding	THRAP3	thyroid hormone receptor associated protein 3 [Source:HGNC Symbol;Acc:22964]
701	ENSG00000054148	4693.28	-0.257552	0.173918	-1.48088	0.138639	0.343594	chr9	139743176	139745488	1908	+	66.23	q34.3	protein_coding	PHPT1	phosphohistidine phosphatase 1 [Source:HGNC Symbol;Acc:30033]
702	ENSG00000054179	31.0235	-0.631953	0.283722	-2.22737	0.0259229	0.113849	chr9	139942550	139948497	2633	-	65.74	q34.3	protein_coding	ENTPD2	ectonucleoside triphosphate diphosphohydrolase 2 [Source:HGNC Symbol;Acc:3364]
703	ENSG00000054219	734.158	0.279328	0.142182	1.96458	0.0494628	0.177248	chr2	160628362	160761260	9430	-	38.38	q24.2	protein_coding	LY75	lymphocyte antigen 75 [Source:HGNC Symbol;Acc:6729]
704	ENSG00000054267	5223.06	-0.0560284	0.111335	-0.503241	0.614795	0.801445	chr1	235294949	235491534	11073	-	39.95	q42.3	protein_coding	ARID4B	AT rich interactive domain 4B (RBP1-like) [Source:HGNC Symbol;Acc:15550]
705	ENSG00000054277	373.49	-0.0844507	0.202321	-0.41741	0.676378	0.83972	chr1	241753404	241840678	3480	-	39.62	q43	protein_coding	OPN3	opsin 3 [Source:HGNC Symbol;Acc:14007]
706	ENSG00000054282	2659.83	0.0121351	0.0974354	0.124545	0.900884	0.957427	chr1	243419320	243663394	5353	+	39.81	q43	protein_coding	SDCCAG8	serologically defined colon cancer antigen 8 [Source:HGNC Symbol;Acc:10671]
707	ENSG00000054356	6.09637	1.17592	0.752072	1.56357	0.117918	0.309601	chr2	220154345	220174370	8261	-	53.59	q35	protein_coding	PTPRN	protein tyrosine phosphatase, receptor type, N [Source:HGNC Symbol;Acc:9676]
708	ENSG00000054392	122.694	0.323098	0.200796	1.60909	0.107598	0.292111	chr1	210501596	210849638	4296	+	42.26	q32.2	protein_coding	HHAT	hedgehog acyltransferase [Source:HGNC Symbol;Acc:18270]
709	ENSG00000054523	102680	-0.341639	0.150464	-2.27056	0.0231733	0.105518	chr1	10270863	10441661	17693	+	41.99	p36.22	protein_coding	KIF1B	kinesin family member 1B [Source:HGNC Symbol;Acc:16636]
710	ENSG00000054598	314.483	0.521642	0.340989	1.52979	0.126068	0.323031	chr6	1610681	1614127	3447	+	53.35	p25.3	protein_coding	FOXC1	forkhead box C1 [Source:HGNC Symbol;Acc:3800]
711	ENSG00000054611	1379.06	-0.0161494	0.135455	-0.119223	0.905098	0.959388	chr22	47158518	47571336	5305	+	49.4	q13.31	protein_coding	TBC1D22A	TBC1 domain family, member 22A [Source:HGNC Symbol;Acc:1309]
712	ENSG00000054654	41410.5	-0.351073	0.0945674	-3.71241	0.000205296	0.00343861	chr14	64319683	64693165	31405	+	40.76	q23.2	protein_coding	SYNE2	spectrin repeat containing, nuclear envelope 2 [Source:HGNC Symbol;Acc:17084]
713	ENSG00000054690	1041.45	-0.235288	0.214103	-1.09895	0.271792	0.516207	chr14	68000018	68056329	10817	+	48.02	q24.1	protein_coding	PLEKHH1	pleckstrin homology domain containing, family H (with MyTH4 domain) member 1 [Source:HGNC Symbol;Acc:17733]
714	ENSG00000054793	5802.09	0.266961	0.220993	1.208	0.227045	0.464361	chr20	50213053	50385173	8317	-	46.69	q13.2	protein_coding	ATP9A	ATPase, class II, type 9A [Source:HGNC Symbol;Acc:13540]
715	ENSG00000054803	73.6556	-0.233199	0.489284	-0.476613	0.633637	0.812655	chr20	54572496	54580528	3024	-	44.01	q13.2	protein_coding	CBLN4	cerebellin 4 precursor [Source:HGNC Symbol;Acc:16231]
716	ENSG00000054938	123.609	-1.30404	0.416013	-3.13462	0.00172078	0.016505	chr11	74407474	74442430	3073	-	51.57	q13.4	protein_coding	CHRDL2	chordin-like 2 [Source:HGNC Symbol;Acc:24168]
717	ENSG00000054965	6109.62	-0.548617	0.132003	-4.15609	3.24e-05	0.000830776	chr11	73111532	73309234	7823	-	41.55	q13.4	protein_coding	FAM168A	family with sequence similarity 168, member A [Source:HGNC Symbol;Acc:28999]
718	ENSG00000054967	2003.69	-0.58896	0.307767	-1.91365	0.0556644	0.191367	chr11	73087309	73108519	6322	+	59.84	q13.4	protein_coding	RELT	RELT tumor necrosis factor receptor [Source:HGNC Symbol;Acc:13764]
719	ENSG00000054983	1584.26	-0.00414186	0.08752	-0.0473248	0.962254	0.983138	chr14	88304164	88460009	6825	-	39.12	q31.3	protein_coding	GALC	galactosylceramidase [Source:HGNC Symbol;Acc:4115]
720	ENSG00000055044	3159.82	-0.0501586	0.152299	-0.329343	0.741896	0.878371	chr2	203130439	203168389	3299	+	41.15	q33.1	protein_coding	NOP58	NOP58 ribonucleoprotein [Source:HGNC Symbol;Acc:29926]
721	ENSG00000055070	5601.88	-0.623143	0.213656	-2.91657	0.00353909	0.0278803	chr1	16679070	16724640	4747	+	48.1	p36.13	protein_coding	SZRD1	SUZ RNA binding domain containing 1 [Source:HGNC Symbol;Acc:30232]
722	ENSG00000055118	49.7816	2.39517	0.576771	4.15272	3.29e-05	0.00083655	chr7	150642049	150675403	7017	-	59.57	q36.1	protein_coding	KCNH2	potassium voltage-gated channel, subfamily H (eag-related), member 2 [Source:HGNC Symbol;Acc:6251]
723	ENSG00000055130	7870.76	-0.389201	0.0798739	-4.87269	1.1e-06	5.43e-05	chr7	148395006	148498128	3548	+	41.22	q36.1	protein_coding	CUL1	cullin 1 [Source:HGNC Symbol;Acc:2551]
724	ENSG00000055147	1923.88	-0.13287	0.116356	-1.14193	0.253482	0.495909	chr5	153369688	153418496	6543	-	37.35	q33.2	protein_coding	FAM114A2	family with sequence similarity 114, member A2 [Source:HGNC Symbol;Acc:1333]
725	ENSG00000055163	1011.83	-0.797659	0.384247	-2.0759	0.037903	0.147744	chr5	156693089	156822606	10509	+	44.29	q33.3	protein_coding	CYFIP2	cytoplasmic FMR1 interacting protein 2 [Source:HGNC Symbol;Acc:13760]
726	ENSG00000055208	6811.85	-0.609032	0.212146	-2.87081	0.00409423	0.0309133	chr6	149539777	149732749	5758	+	38.87	q25.1	protein_coding	TAB2	TGF-beta activated kinase 1/MAP3K7 binding protein 2 [Source:HGNC Symbol;Acc:17075]
727	ENSG00000055211	2466.46	-0.219161	0.1362	-1.60911	0.107593	0.292111	chr6	149887430	149912884	2248	+	42.05	q25.1	protein_coding	GINM1	glycoprotein integral membrane 1 [Source:HGNC Symbol;Acc:21074]
728	ENSG00000055483	2772.18	0.0548894	0.104549	0.52501	0.599576	0.791495	chr17	76783463	76837523	10409	-	50.03	q25.3	protein_coding	USP36	ubiquitin specific peptidase 36 [Source:HGNC Symbol;Acc:20062]
729	ENSG00000055609	29815.4	-0.151093	0.0998864	-1.51265	0.130369	0.330077	chr7	151832010	152133090	22650	-	38.65	q36.1	protein_coding	KMT2C	lysine (K)-specific methyltransferase 2C [Source:HGNC Symbol;Acc:13726]
730	ENSG00000055732	193.916	0.813759	0.348945	2.33205	0.0196978	0.0944035	chr1	85483765	85514182	6623	-	40.77	p22.3	protein_coding	MCOLN3	mucolipin 3 [Source:HGNC Symbol;Acc:13358]
731	ENSG00000055813	914.196	0.11976	0.212885	0.562556	0.573738	0.775046	chr2	56411258	56613308	3982	+	38.49	p16.1	protein_coding	CCDC85A	coiled-coil domain containing 85A [Source:HGNC Symbol;Acc:29400]
732	ENSG00000055917	7099.65	0.327699	0.115368	2.84046	0.00450485	0.0331143	chr2	20448452	20551995	6858	-	37.42	p24.1	protein_coding	PUM2	pumilio RNA-binding family member 2 [Source:HGNC Symbol;Acc:14958]
733	ENSG00000055950	2330.42	-0.0966724	0.146971	-0.657763	0.51069	0.730881	chr10	102729215	102747272	3573	-	53.18	q24.31	protein_coding	MRPL43	mitochondrial ribosomal protein L43 [Source:HGNC Symbol;Acc:14517]
734	ENSG00000055955	20292.8	0.412503	0.178724	2.30805	0.0209966	0.0986951	chr3	52846991	52865495	5462	-	55.65	p21.1	protein_coding	ITIH4	inter-alpha-trypsin inhibitor heavy chain family, member 4 [Source:HGNC Symbol;Acc:6169]
735	ENSG00000055957	38.3611	0.818079	0.559311	1.46265	0.143562	0.351652	chr3	52811603	52826078	4543	+	54.92	p21.1	protein_coding	ITIH1	inter-alpha-trypsin inhibitor heavy chain 1 [Source:HGNC Symbol;Acc:6166]
736	ENSG00000056050	672.362	-0.0229314	0.147644	-0.155315	0.876573	0.946454	chr4	170650616	170679104	1436	-	38.6	q33	protein_coding	C4orf27	chromosome 4 open reading frame 27 [Source:HGNC Symbol;Acc:26051]
737	ENSG00000056097	9286.52	0.100998	0.113068	0.893248	0.371724	0.617401	chr5	32354456	32444867	6792	-	38.33	p13.3	protein_coding	ZFR	zinc finger RNA binding protein [Source:HGNC Symbol;Acc:17277]
738	ENSG00000056277	686.482	1.12224	0.181582	6.18034	6.4e-10	8.95e-08	chrX	129336685	129402873	4634	-	38.02	q26.1	protein_coding	ZNF280C	zinc finger protein 280C [Source:HGNC Symbol;Acc:25955]
739	ENSG00000056487	57.3429	2.28247	0.491792	4.64113	3.47e-06	0.000136546	chr22	45277042	45405880	5753	-	52.73	q13.31	protein_coding	PHF21B	PHD finger protein 21B [Source:HGNC Symbol;Acc:25161]
740	ENSG00000056558	573.553	-0.00244243	0.168807	-0.0144688	0.988456	0.99451	chr9	123664671	123691451	6449	-	49.95	q33.2	protein_coding	TRAF1	TNF receptor-associated factor 1 [Source:HGNC Symbol;Acc:12031]
741	ENSG00000056586	7332.94	0.0949028	0.126894	0.747893	0.454525	0.687905	chr9	125606835	125667620	11545	-	40.5	q33.2	protein_coding	RC3H2	ring finger and CCCH-type domains 2 [Source:HGNC Symbol;Acc:21461]
742	ENSG00000056661	451.7	-0.426654	0.199308	-2.14068	0.0322996	0.132402	chr17	36890150	36906070	3511	-	57.06	q12	protein_coding	PCGF2	polycomb group ring finger 2 [Source:HGNC Symbol;Acc:12929]
743	ENSG00000056736	465.468	-0.118916	0.147578	-0.805786	0.420366	0.660074	chr3	53880607	53899827	3038	+	45.37	p21.1	protein_coding	IL17RB	interleukin 17 receptor B [Source:HGNC Symbol;Acc:18015]
744	ENSG00000056972	1197.45	0.823459	0.209557	3.92951	8.51e-05	0.00175998	chr6	111877657	111927481	6553	-	44.45	q21	protein_coding	TRAF3IP2	TRAF3 interacting protein 2 [Source:HGNC Symbol;Acc:1343]
745	ENSG00000056998	79.3781	1.27537	1.06916	1.19288	0.232918	0.471456	chrX	2746829	2800859	3646	+	43.67	p22.33	protein_coding	GYG2	glycogenin 2 [Source:HGNC Symbol;Acc:4700]
746	ENSG00000057019	2870.84	0.257351	0.205342	1.25328	0.210103	0.443972	chr3	98514785	98620533	11274	-	38.58	q12.1	protein_coding	DCBLD2	discoidin, CUB and LCCL domain containing 2 [Source:HGNC Symbol;Acc:24627]
747	ENSG00000057252	806.61	0.379337	0.169169	2.24236	0.024938	0.110836	chr1	179262925	179327815	7033	+	39.59	q25.2	protein_coding	SOAT1	sterol O-acyltransferase 1 [Source:HGNC Symbol;Acc:11177]
748	ENSG00000057294	1171.34	-0.884552	0.246348	-3.59066	0.00032984	0.00489966	chr12	32943679	33049774	6069	-	40.8	p11.21	protein_coding	PKP2	plakophilin 2 [Source:HGNC Symbol;Acc:9024]
749	ENSG00000057468	287.907	-0.183449	0.255874	-0.716949	0.473406	0.702996	chr1	76262567	76378923	3266	+	37.01	p31.1	protein_coding	MSH4	mutS homolog 4 [Source:HGNC Symbol;Acc:7327]
750	ENSG00000057593	12.0903	0.811753	0.471886	1.72023	0.0853905	0.252475	chr13	113760105	113774995	3792	+	61.36	q34	protein_coding	F7	coagulation factor VII (serum prothrombin conversion accelerator) [Source:HGNC Symbol;Acc:3544]
751	ENSG00000057608	8297.84	0.119424	0.113042	1.05646	0.29076	0.53712	chr10	5807186	5884095	4033	-	43.74	p15.1	protein_coding	GDI2	GDP dissociation inhibitor 2 [Source:HGNC Symbol;Acc:4227]
752	ENSG00000057657	177.51	0.461321	0.194093	2.37681	0.0174631	0.0870297	chr6	106534195	106557814	6369	+	41.29	q21	protein_coding	PRDM1	PR domain containing 1, with ZNF domain [Source:HGNC Symbol;Acc:9346]
753	ENSG00000057663	2049.66	-0.300788	0.113884	-2.64118	0.00826185	0.0513241	chr6	106632351	106773666	3924	-	36.83	q21	protein_coding	ATG5	autophagy related 5 [Source:HGNC Symbol;Acc:589]
754	ENSG00000057704	3922.5	0.475058	0.175978	2.69954	0.00694363	0.0452733	chr12	94960900	95044338	6515	-	43.11	q22	protein_coding	TMCC3	transmembrane and coiled-coil domain family 3 [Source:HGNC Symbol;Acc:29199]	MI0025514	hsa-mir-7844
755	ENSG00000057757	3014.15	-0.104933	0.106899	-0.981608	0.326293	0.574473	chr1	24104895	24114722	2186	+	44.59	p36.11	protein_coding	PITHD1	PITH (C-terminal proteasome-interacting domain of thioredoxin-like) domain containing 1 [Source:HGNC Symbol;Acc:25022]
756	ENSG00000057935	1594.33	0.286068	0.129435	2.21012	0.0270966	0.117216	chr2	42721709	42984087	10580	+	43.08	p21	protein_coding	MTA3	metastasis associated 1 family, member 3 [Source:HGNC Symbol;Acc:23784]
757	ENSG00000058056	59285	-0.38045	0.193126	-1.96995	0.0488439	0.17566	chr3	179370543	179507189	8440	+	42.73	q26.33	protein_coding	USP13	ubiquitin specific peptidase 13 (isopeptidase T-3) [Source:HGNC Symbol;Acc:12611]
758	ENSG00000058063	4743.57	0.242789	0.0928638	2.61446	0.00893682	0.0542481	chr3	182511288	182639423	9196	+	36.02	q26.33	protein_coding	ATP11B	ATPase, class VI, type 11B [Source:HGNC Symbol;Acc:13553]
759	ENSG00000058085	166.06	0.0845746	0.3958	0.21368	0.830796	0.924946	chr1	183155373	183214035	6543	+	43.28	q25.3	protein_coding	LAMC2	laminin, gamma 2 [Source:HGNC Symbol;Acc:6493]
760	ENSG00000058091	1486.85	0.0926241	0.124326	0.74501	0.456266	0.689402	chr7	90095738	90839905	6841	+	37.97	q21.13	protein_coding	CDK14	cyclin-dependent kinase 14 [Source:HGNC Symbol;Acc:8883]
761	ENSG00000058262	6734.11	-0.150346	0.127158	-1.18235	0.237067	0.476137	chr3	127770484	127790526	4697	+	47.3	q21.3	protein_coding	SEC61A1	Sec61 alpha 1 subunit (S. cerevisiae) [Source:HGNC Symbol;Acc:18276]
762	ENSG00000058272	8234.45	0.0698618	0.0795494	0.878219	0.379825	0.624872	chr12	80167343	80329240	12490	-	36.07	q21.31	protein_coding	PPP1R12A	protein phosphatase 1, regulatory subunit 12A [Source:HGNC Symbol;Acc:7618]
763	ENSG00000058335	24.6541	0.0239819	0.529734	0.0452716	0.963891	0.983937	chr15	79252289	79383115	8683	-	49.95	q25.1	protein_coding	RASGRF1	Ras protein-specific guanine nucleotide-releasing factor 1 [Source:HGNC Symbol;Acc:9875]
764	ENSG00000058404	10816.6	-0.409629	0.174572	-2.34648	0.0189517	0.09193	chr7	44256749	44374176	8159	-	55.17	p13	protein_coding	CAMK2B	calcium/calmodulin-dependent protein kinase II beta [Source:HGNC Symbol;Acc:1461]
765	ENSG00000058453	2323.46	-0.137692	0.19009	-0.724349	0.468852	0.699032	chr1	17066768	17299474	8871	+	49.14	p36.13	protein_coding	CROCC	ciliary rootlet coiled-coil, rootletin [Source:HGNC Symbol;Acc:21299]
766	ENSG00000058600	5574.5	-0.150603	0.0891293	-1.68971	0.0910833	0.262538	chr16	22308730	22346424	9454	+	51.65	p12.2	protein_coding	POLR3E	polymerase (RNA) III (DNA directed) polypeptide E (80kD) [Source:HGNC Symbol;Acc:30347]
767	ENSG00000058668	8448.61	-0.0667268	0.208517	-0.320007	0.748963	0.881744	chr1	203595689	203713209	9721	+	46.5	q32.1	protein_coding	ATP2B4	ATPase, Ca++ transporting, plasma membrane 4 [Source:HGNC Symbol;Acc:817]
768	ENSG00000058673	23932.3	0.0848959	0.170224	0.498731	0.617969	0.803285	chr1	203764782	203823252	9700	+	40.85	q32.1	protein_coding	ZC3H11A	zinc finger CCCH-type containing 11A [Source:HGNC Symbol;Acc:29093]
769	ENSG00000058729	1656.27	-0.00498294	0.120151	-0.0414725	0.966919	0.98557	chr5	96496571	96518964	5502	-	36.71	q15	protein_coding	RIOK2	RIO kinase 2 [Source:HGNC Symbol;Acc:18999]
770	ENSG00000058799	848.342	-0.235542	0.123864	-1.90163	0.0572202	0.195016	chr1	54317392	54356407	2259	-	43.57	p32.3	protein_coding	YIPF1	Yip1 domain family, member 1 [Source:HGNC Symbol;Acc:25231]
771	ENSG00000058804	966.853	0.00976363	0.115603	0.0844581	0.932692	0.971185	chr1	54231133	54304533	5135	-	40.26	p32.3	protein_coding	NDC1	NDC1 transmembrane nucleoporin [Source:HGNC Symbol;Acc:25525]
772	ENSG00000058866	974.907	-0.44327	0.221554	-2.00073	0.0454217	0.167265	chr3	185823457	186080026	10978	-	44.7	q27.3	protein_coding	DGKG	diacylglycerol kinase, gamma 90kDa [Source:HGNC Symbol;Acc:2853]
773	ENSG00000059122	3384.03	-0.187035	0.201419	-0.928587	0.353103	0.600035	chr16	2961938	3001209	8413	+	52.33	p13.3	protein_coding	FLYWCH1	FLYWCH-type zinc finger 1 [Source:HGNC Symbol;Acc:25404]
774	ENSG00000059145	2505.04	-0.246285	0.157526	-1.56346	0.117944	0.309624	chr16	1413206	1464752	8504	-	57.82	p13.3	protein_coding	UNKL	unkempt family zinc finger-like [Source:HGNC Symbol;Acc:14184]
775	ENSG00000059377	263.804	0.390775	0.174134	2.2441	0.0248261	0.110475	chr7	139476850	139720125	6271	+	44.8	q34	protein_coding	TBXAS1	thromboxane A synthase 1 (platelet) [Source:HGNC Symbol;Acc:11609]
776	ENSG00000059573	732.862	0.752517	0.190562	3.94894	7.85e-05	0.00165937	chr10	97365696	97416463	3756	-	43.15	q24.1	protein_coding	ALDH18A1	aldehyde dehydrogenase 18 family, member A1 [Source:HGNC Symbol;Acc:9722]
777	ENSG00000059588	4532.89	0.101401	0.138796	0.730574	0.46504	0.696511	chr1	234527059	234614849	7743	-	40.27	q42.2	protein_coding	TARBP1	TAR (HIV-1) RNA binding protein 1 [Source:HGNC Symbol;Acc:11568]
778	ENSG00000059691	2220.23	-0.225137	0.155522	-1.44763	0.147721	0.357917	chr4	152591656	152682175	11757	-	43.81	q31.3	protein_coding	PET112	PET112 homolog (yeast) [Source:HGNC Symbol;Acc:8849]
779	ENSG00000059728	1918.11	-0.0932261	0.111077	-0.839293	0.401305	0.644177	chr2	70124820	70170077	6321	+	40.74	p13.3	protein_coding	MXD1	MAX dimerization protein 1 [Source:HGNC Symbol;Acc:6761]
780	ENSG00000059758	2542.8	0.180773	0.173071	1.0445	0.296253	0.543293	chr12	96672039	96794338	6547	-	37.82	q23.1	protein_coding	CDK17	cyclin-dependent kinase 17 [Source:HGNC Symbol;Acc:8750]
781	ENSG00000059769	1943.88	0.139199	0.184949	0.752637	0.451668	0.686006	chr9	114393632	114432508	3675	+	43.46	q31.3	protein_coding	DNAJC25	DnaJ (Hsp40) homolog, subfamily C , member 25 [Source:HGNC Symbol;Acc:34187]
782	ENSG00000059804	838.558	0.292905	0.422179	0.693794	0.487811	0.715033	chr12	8071826	8088871	6159	-	44.63	p13.31	protein_coding	SLC2A3	solute carrier family 2 (facilitated glucose transporter), member 3 [Source:HGNC Symbol;Acc:11007]
783	ENSG00000059915	151.269	0.309243	0.176029	1.75677	0.0789568	0.239884	chr10	104162376	104181296	6327	-	59.67	q24.32	protein_coding	PSD	pleckstrin and Sec7 domain containing [Source:HGNC Symbol;Acc:9507]
784	ENSG00000060069	1012.26	-0.256754	0.128583	-1.99679	0.0458481	0.168336	chr18	77439801	77514510	5296	+	53.38	q23	protein_coding	CTDP1	CTD (carboxy-terminal domain, RNA polymerase II, polypeptide A) phosphatase, subunit 1 [Source:HGNC Symbol;Acc:2498]
785	ENSG00000060138	67993.5	-0.523563	0.208602	-2.50987	0.0120776	0.0672018	chr12	10851683	10875911	8615	-	39.09	p13.2	protein_coding	YBX3	Y box binding protein 3 [Source:HGNC Symbol;Acc:2428]
786	ENSG00000060140	24.7048	-1.2366	0.741357	-1.66803	0.0953105	0.270525	chr12	10771538	10826917	3424	-	39.44	p13.2	protein_coding	STYK1	serine/threonine/tyrosine kinase 1 [Source:HGNC Symbol;Acc:18889]
787	ENSG00000060237	36857	-0.242034	0.155021	-1.5613	0.118454	0.310226	chr12	861759	1020618	14370	+	38.72	p13.33	protein_coding	WNK1	WNK lysine deficient protein kinase 1 [Source:HGNC Symbol;Acc:14540]
788	ENSG00000060339	5357.1	0.0508023	0.107934	0.470681	0.637869	0.815642	chr10	70480769	70552134	6002	+	41.75	q21.3	protein_coding	CCAR1	cell division cycle and apoptosis regulator 1 [Source:HGNC Symbol;Acc:24236]
789	ENSG00000060491	1795.96	-0.283221	0.283432	-0.999253	0.317672	0.565299	chr20	61436187	61445352	4702	+	63.45	q13.33	protein_coding	OGFR	opioid growth factor receptor [Source:HGNC Symbol;Acc:15768]
790	ENSG00000060558	77.6946	1.09223	0.247143	4.41943	9.9e-06	0.000326237	chr19	3136191	3163767	2613	+	52.55	p13.3	protein_coding	GNA15	guanine nucleotide binding protein (G protein), alpha 15 (Gq class) [Source:HGNC Symbol;Acc:4383]
791	ENSG00000060642	516.444	-0.00983565	0.145114	-0.0677789	0.945962	0.976951	chr1	27113963	27124889	3382	+	48.34	p36.11	protein_coding	PIGV	phosphatidylinositol glycan anchor biosynthesis, class V [Source:HGNC Symbol;Acc:26031]
792	ENSG00000060656	2271.05	-0.244784	0.322072	-0.760031	0.447236	0.682946	chr1	29563028	29653325	6700	+	51.58	p35.3	protein_coding	PTPRU	protein tyrosine phosphatase, receptor type, U [Source:HGNC Symbol;Acc:9683]
793	ENSG00000060688	1700.25	0.0181303	0.143177	0.126629	0.899234	0.956665	chr1	31732417	31769662	4011	-	42.04	p35.2	protein_coding	SNRNP40	small nuclear ribonucleoprotein 40kDa (U5) [Source:HGNC Symbol;Acc:30857]
794	ENSG00000060709	40.4569	-1.9104	0.503413	-3.7949	0.000147703	0.00267038	chr12	130880682	131200826	8738	-	48.94	q24.33	protein_coding	RIMBP2	RIMS binding protein 2 [Source:HGNC Symbol;Acc:30339]
795	ENSG00000060718	153.833	3.529	0.856317	4.12115	3.77e-05	0.000930919	chr1	103342023	103574052	8265	-	33.13	p21.1	protein_coding	COL11A1	collagen, type XI, alpha 1 [Source:HGNC Symbol;Acc:2186]
796	ENSG00000060749	5851.63	0.0848895	0.16752	0.506741	0.612336	0.799602	chr11	32914724	33014862	10537	+	38.54	p13	protein_coding	QSER1	glutamine and serine rich 1 [Source:HGNC Symbol;Acc:26154]
797	ENSG00000060762	4026.49	-0.601987	0.164352	-3.66279	0.00024948	0.00397686	chr6	166778407	166796486	1525	-	38.9	q27	protein_coding	MPC1	mitochondrial pyruvate carrier 1 [Source:HGNC Symbol;Acc:21606]
798	ENSG00000060971	1634.49	-0.166852	0.189567	-0.880172	0.378766	0.623901	chr3	38144620	38178733	7106	-	51.46	p22.2	protein_coding	ACAA1	acetyl-CoA acyltransferase 1 [Source:HGNC Symbol;Acc:82]
799	ENSG00000060982	553.361	0.7341	0.275336	2.6662	0.0076714	0.0487549	chr12	24964295	25102393	10372	-	40.09	p12.1	protein_coding	BCAT1	branched chain amino-acid transaminase 1, cytosolic [Source:HGNC Symbol;Acc:976]
800	ENSG00000061273	2938.59	-0.388231	0.162799	-2.38473	0.0170916	0.0857271	chr12	48176505	48226915	9936	-	54.88	q13.11	protein_coding	HDAC7	histone deacetylase 7 [Source:HGNC Symbol;Acc:14067]
801	ENSG00000061337	276.392	0.408573	0.177899	2.29666	0.021638	0.100645	chr8	20103676	20161474	5706	-	50.43	p21.3	protein_coding	LZTS1	leucine zipper, putative tumor suppressor 1 [Source:HGNC Symbol;Acc:13861]
802	ENSG00000061455	110.53	0.221803	0.27952	0.793514	0.427478	0.66689	chr5	122424816	122529960	9350	+	40.19	q23.2	protein_coding	PRDM6	PR domain containing 6 [Source:HGNC Symbol;Acc:9350]
803	ENSG00000061656	94.716	-0.157446	0.261018	-0.6032	0.546376	0.756803	chr20	34203814	34208971	2240	+	59.4	q11.22	protein_coding	SPAG4	sperm associated antigen 4 [Source:HGNC Symbol;Acc:11214]
804	ENSG00000061676	19118.6	-0.220785	0.109431	-2.01757	0.0436357	0.162991	chr2	183773843	183903586	22520	-	35.82	q32.1	protein_coding	NCKAP1	NCK-associated protein 1 [Source:HGNC Symbol;Acc:7666]
805	ENSG00000061794	3983.37	-0.292533	0.12515	-2.33746	0.0194151	0.0934094	chr12	27863706	27909228	1979	+	38.64	p11.22	protein_coding	MRPS35	mitochondrial ribosomal protein S35 [Source:HGNC Symbol;Acc:16635]
806	ENSG00000061918	873.433	-0.198287	0.169427	-1.17034	0.241863	0.482145	chr4	156680144	156728743	3724	+	36.52	q32.1	protein_coding	GUCY1B3	guanylate cyclase 1, soluble, beta 3 [Source:HGNC Symbol;Acc:4687]
807	ENSG00000061936	3712.32	-0.0749115	0.104667	-0.715712	0.474169	0.703751	chr12	132195626	132284282	10157	+	46.45	q24.33	protein_coding	SFSWAP	splicing factor, suppressor of white-apricot homolog (Drosophila) [Source:HGNC Symbol;Acc:10790]
808	ENSG00000061938	6792.39	-0.89453	0.158187	-5.65488	1.56e-08	1.53e-06	chr3	195590235	195638816	11297	-	58.27	q29	protein_coding	TNK2	tyrosine kinase, non-receptor, 2 [Source:HGNC Symbol;Acc:19297]
809	ENSG00000061987	6403.78	-0.0183892	0.102476	-0.179449	0.857585	0.937197	chr12	62860597	62991363	13121	+	36.26	q14.1	protein_coding	MON2	MON2 homolog (S. cerevisiae) [Source:HGNC Symbol;Acc:29177]
810	ENSG00000062038	9.72642	1.14528	0.54604	2.09743	0.0359555	0.142593	chr16	68670092	68756519	5009	+	49.26	q22.1	protein_coding	CDH3	cadherin 3, type 1, P-cadherin (placental) [Source:HGNC Symbol;Acc:1762]
811	ENSG00000062194	7306.82	-0.225158	0.0980472	-2.29643	0.0216515	0.100682	chr5	56469775	56560506	6493	+	40.02	q11.2	protein_coding	GPBP1	GC-rich promoter binding protein 1 [Source:HGNC Symbol;Acc:29520]
812	ENSG00000062282	330.17	0.803615	0.824677	0.97446	0.329828	0.578067	chr11	75470557	75512579	7904	+	52.02	q13.5	protein_coding	DGAT2	diacylglycerol O-acyltransferase 2 [Source:HGNC Symbol;Acc:16940]
813	ENSG00000062370	721.089	0.125599	0.125124	1.0038	0.315475	0.563395	chr19	44830708	44871377	3848	-	38.32	q13.31	protein_coding	ZNF112	zinc finger protein 112 [Source:HGNC Symbol;Acc:12892]
814	ENSG00000062485	28756.9	-0.473485	0.163934	-2.88826	0.00387374	0.0297544	chr12	56665483	56694176	6402	-	46.16	q13.3	protein_coding	CS	citrate synthase [Source:HGNC Symbol;Acc:2422]
815	ENSG00000062524	437.862	4.8527	0.714578	6.791	1.11e-11	2.49e-09	chr15	41795836	41806085	3490	-	57.9	q15.1	protein_coding	LTK	leukocyte receptor tyrosine kinase [Source:HGNC Symbol;Acc:6721]
816	ENSG00000062582	4875.06	-0.422779	0.186307	-2.26927	0.0232521	0.10576	chr7	43906157	43909492	2613	-	50.93	p13	protein_coding	MRPS24	mitochondrial ribosomal protein S24 [Source:HGNC Symbol;Acc:14510]
817	ENSG00000062598	3179.06	0.0134963	0.108846	0.123994	0.90132	0.957643	chr20	44994688	45061704	6714	-	44.15	q13.12	protein_coding	ELMO2	engulfment and cell motility 2 [Source:HGNC Symbol;Acc:17233]
818	ENSG00000062650	7723.1	-0.0946747	0.0722646	-1.31011	0.190158	0.418006	chr10	88195013	88281572	7280	-	39.87	q23.2	protein_coding	WAPAL	wings apart-like homolog (Drosophila) [Source:HGNC Symbol;Acc:23293]
819	ENSG00000062716	3766	0.839317	0.16453	5.1013	3.37e-07	2.08e-05	chr17	57784553	57919616	6916	+	39.75	q23.1	protein_coding	VMP1	vacuole membrane protein 1 [Source:HGNC Symbol;Acc:29559]	MI0000077	hsa-mir-21
820	ENSG00000062725	3954.91	0.0835133	0.0813509	1.02658	0.304618	0.552277	chr17	58520520	58603580	9866	-	39.7	q23.2	protein_coding	APPBP2	amyloid beta precursor protein (cytoplasmic tail) binding protein 2 [Source:HGNC Symbol;Acc:622]
821	ENSG00000062822	551.736	0.0227153	0.140007	0.162244	0.871114	0.943996	chr19	50887461	50921273	4856	+	55.06	q13.33	protein_coding	POLD1	polymerase (DNA directed), delta 1, catalytic subunit [Source:HGNC Symbol;Acc:9175]
822	ENSG00000063015	199.128	0.0657662	0.147952	0.444509	0.656674	0.827554	chr17	27281919	27333458	5103	-	54.21	q11.2	protein_coding	SEZ6	seizure related 6 homolog (mouse) [Source:HGNC Symbol;Acc:15955]
823	ENSG00000063046	69801.7	-0.0741913	0.127656	-0.581183	0.561117	0.766847	chr12	53399942	53435993	6146	+	42.8	q13.13	protein_coding	EIF4B	eukaryotic translation initiation factor 4B [Source:HGNC Symbol;Acc:3285]
824	ENSG00000063127	106.139	-0.215377	0.236055	-0.912405	0.361555	0.6084	chr19	49792895	49828482	3599	-	43.07	q13.33	protein_coding	SLC6A16	solute carrier family 6, member 16 [Source:HGNC Symbol;Acc:13622]
825	ENSG00000063169	424.977	-0.263704	0.227129	-1.16103	0.24563	0.486971	chr19	48111453	48206533	7147	+	51.89	q13.33	protein_coding	GLTSCR1	glioma tumor suppressor candidate region gene 1 [Source:HGNC Symbol;Acc:4332]
826	ENSG00000063176	997.157	-0.105642	0.185483	-0.569549	0.568984	0.771875	chr19	49122548	49133974	6008	+	56.78	q13.33	protein_coding	SPHK2	sphingosine kinase 2 [Source:HGNC Symbol;Acc:18859]
827	ENSG00000063177	12205.5	0.0686742	0.0942523	0.728621	0.466234	0.697238	chr19	49118585	49122793	4209	-	56.83	q13.33	protein_coding	RPL18	ribosomal protein L18 [Source:HGNC Symbol;Acc:10310]
828	ENSG00000063180	174.046	-0.427584	0.339347	-1.26002	0.207661	0.440703	chr19	49141199	49149569	2075	-	53.83	q13.33	protein_coding	CA11	carbonic anhydrase XI [Source:HGNC Symbol;Acc:1370]
829	ENSG00000063241	2197.04	-0.389444	0.273125	-1.42588	0.153902	0.366913	chr19	55964352	55973710	4408	-	56.69	q13.42	protein_coding	ISOC2	isochorismatase domain containing 2 [Source:HGNC Symbol;Acc:26278]
830	ENSG00000063244	2540.68	-0.105443	0.098674	-1.0686	0.28525	0.531032	chr19	56165512	56186081	4115	+	56.03	q13.42	protein_coding	U2AF2	U2 small nuclear RNA auxiliary factor 2 [Source:HGNC Symbol;Acc:23156]
831	ENSG00000063245	4778.25	-0.753293	0.183546	-4.10411	4.06e-05	0.000986362	chr19	56186592	56221224	3849	+	54.85	q13.42	protein_coding	EPN1	epsin 1 [Source:HGNC Symbol;Acc:21604]
832	ENSG00000063322	1462.17	-0.264974	0.155553	-1.70343	0.0884879	0.258013	chr19	39881943	39891277	3835	+	52.36	q13.2	protein_coding	MED29	mediator complex subunit 29 [Source:HGNC Symbol;Acc:23074]
833	ENSG00000063587	1175.85	-0.0842915	0.179152	-0.470503	0.637995	0.815642	chrX	152599613	152625568	8148	+	49.08	q28	protein_coding	ZNF275	zinc finger protein 275 [Source:HGNC Symbol;Acc:13069]
834	ENSG00000063601	2889.73	0.334381	0.110326	3.03085	0.00243867	0.021198	chrX	149861435	149933576	6332	+	42.48	q28	protein_coding	MTMR1	myotubularin related protein 1 [Source:HGNC Symbol;Acc:7449]
835	ENSG00000063660	10235.1	-0.153996	0.169973	-0.906006	0.364932	0.611473	chr2	241375088	241407493	6514	+	64.63	q37.3	protein_coding	GPC1	glypican 1 [Source:HGNC Symbol;Acc:4449]
836	ENSG00000063761	770.199	-0.68309	0.153933	-4.43757	9.1e-06	0.000303078	chr14	78266426	78401355	5317	+	47.63	q24.3	protein_coding	ADCK1	aarF domain containing kinase 1 [Source:HGNC Symbol;Acc:19038]
837	ENSG00000063854	4214.97	-0.39831	0.189746	-2.09917	0.0358021	0.142173	chr16	1845621	1877195	5052	-	53.33	p13.3	protein_coding	HAGH	hydroxyacylglutathione hydrolase [Source:HGNC Symbol;Acc:4805]
838	ENSG00000063978	2494.44	-0.233158	0.0974993	-2.39138	0.0167851	0.084793	chr4	2463947	2627047	7276	+	47.38	p16.3	protein_coding	RNF4	ring finger protein 4 [Source:HGNC Symbol;Acc:10067]
839	ENSG00000064012	437.181	0.227094	0.21353	1.06352	0.287546	0.53332	chr2	202098166	202152434	6808	+	43.9	q33.1	protein_coding	CASP8	caspase 8, apoptosis-related cysteine peptidase [Source:HGNC Symbol;Acc:1509]
840	ENSG00000064042	47799.2	0.00111866	0.204748	0.00546358	0.995641	0.997957	chr4	41361624	41702061	10862	+	40.5	p13	protein_coding	LIMCH1	LIM and calponin homology domains 1 [Source:HGNC Symbol;Acc:29191]
841	ENSG00000064102	1765.4	-0.120663	0.113895	-1.05942	0.289408	0.535624	chr12	27058114	27091259	3345	-	36.38	p11.23	protein_coding	ASUN	asunder spermatogenesis regulator [Source:HGNC Symbol;Acc:20174]
842	ENSG00000064115	1702.25	0.135416	0.0812515	1.66663	0.0955884	0.271084	chr12	27126128	27167367	3888	-	40.51	p11.23	protein_coding	TM7SF3	transmembrane 7 superfamily member 3 [Source:HGNC Symbol;Acc:23049]
843	ENSG00000064199	55.8082	0.154414	0.351507	0.439293	0.660449	0.830101	chr11	124543694	124567414	5205	+	37.97	q24.2	protein_coding	SPA17	sperm autoantigenic protein 17 [Source:HGNC Symbol;Acc:11210]
844	ENSG00000064201	76.2407	0.491846	0.280779	1.75172	0.0798218	0.241452	chr11	2323227	2339430	3793	+	63.03	p15.5	protein_coding	TSPAN32	tetraspanin 32 [Source:HGNC Symbol;Acc:13410]
845	ENSG00000064205	1919.86	0.347965	0.317439	1.09616	0.273008	0.517724	chr20	43343485	43357150	4981	+	51.46	q13.12	protein_coding	WISP2	WNT1 inducible signaling pathway protein 2 [Source:HGNC Symbol;Acc:12770]
846	ENSG00000064218	38.8057	0.362702	0.465833	0.77861	0.436209	0.674268	chr9	976964	991731	2387	+	43.73	p24.3	protein_coding	DMRT3	doublesex and mab-3 related transcription factor 3 [Source:HGNC Symbol;Acc:13909]
847	ENSG00000064225	1499.27	0.120593	0.354141	0.340521	0.733464	0.873048	chr3	98451080	98540045	6288	+	38.88	q12.1	protein_coding	ST3GAL6	ST3 beta-galactoside alpha-2,3-sialyltransferase 6 [Source:HGNC Symbol;Acc:18080]
848	ENSG00000064270	88.3728	0.571132	0.245105	2.33015	0.019798	0.0947497	chr16	84402133	84497793	6693	+	48.83	q24.1	protein_coding	ATP2C2	ATPase, Ca++ transporting, type 2C, member 2 [Source:HGNC Symbol;Acc:29103]
849	ENSG00000064300	416.939	0.51423	0.339078	1.51655	0.12938	0.328707	chr17	47572655	47592379	4150	+	56.74	q21.33	protein_coding	NGFR	nerve growth factor receptor [Source:HGNC Symbol;Acc:7809]
850	ENSG00000064309	987.73	0.524512	0.304857	1.72052	0.0853385	0.252393	chr11	125825691	125933230	10600	-	39.95	q24.2	protein_coding	CDON	cell adhesion associated, oncogene regulated [Source:HGNC Symbol;Acc:17104]
851	ENSG00000064313	2138.97	0.118635	0.0782367	1.51636	0.129428	0.32876	chr8	120743015	120845103	6547	-	37.5	q24.12	protein_coding	TAF2	TAF2 RNA polymerase II, TATA box binding protein (TBP)-associated factor, 150kDa [Source:HGNC Symbol;Acc:11536]
852	ENSG00000064393	16970.7	-0.545936	0.207202	-2.6348	0.00841868	0.0519265	chr7	139246316	139477577	15220	-	45.52	q34	protein_coding	HIPK2	homeodomain interacting protein kinase 2 [Source:HGNC Symbol;Acc:14402]
853	ENSG00000064419	4134.87	-0.391055	0.14312	-2.73235	0.00628834	0.0421307	chr7	128594948	128695198	3933	-	39.78	q32.1	protein_coding	TNPO3	transportin 3 [Source:HGNC Symbol;Acc:17103]
854	ENSG00000064489	300.674	0.0587654	0.116718	0.503481	0.614626	0.801399	chr19	19256376	19302967	1931	-	54.55	p13.11	protein_coding	MEF2BNB-MEF2B	MEF2BNB-MEF2B readthrough [Source:HGNC Symbol;Acc:39979]
855	ENSG00000064490	1280.33	-0.102748	0.109529	-0.938093	0.348197	0.595608	chr19	19303008	19312678	2533	+	54.72	p13.11	protein_coding	RFXANK	regulatory factor X-associated ankyrin-containing protein [Source:HGNC Symbol;Acc:9987]
856	ENSG00000064545	1980.8	-0.645476	0.229392	-2.81385	0.00489516	0.0351555	chr19	19229978	19249322	3281	-	51.6	p13.11	protein_coding	TMEM161A	transmembrane protein 161A [Source:HGNC Symbol;Acc:26020]
857	ENSG00000064547	40.1647	0.102093	0.246009	0.414996	0.678145	0.840509	chr19	19734477	19739739	2980	-	58.96	p13.11	protein_coding	LPAR2	lysophosphatidic acid receptor 2 [Source:HGNC Symbol;Acc:3168]
858	ENSG00000064601	2969.22	0.149504	0.132483	1.12847	0.25912	0.502106	chr20	44518783	44527459	5856	+	56.04	q13.12	protein_coding	CTSA	cathepsin A [Source:HGNC Symbol;Acc:9251]
859	ENSG00000064607	9097.5	0.0826668	0.0808941	1.02191	0.306822	0.555167	chr19	19101697	19144832	7744	-	50	p13.11	protein_coding	SUGP2	SURP and G patch domain containing 2 [Source:HGNC Symbol;Acc:18641]
860	ENSG00000064651	6531.63	-0.716331	0.285039	-2.5131	0.0119675	0.0668166	chr5	127419458	127525380	10664	+	35.24	q23.3	protein_coding	SLC12A2	solute carrier family 12 (sodium/potassium/chloride transporter), member 2 [Source:HGNC Symbol;Acc:10911]
861	ENSG00000064652	1124.38	-0.1837	0.121903	-1.50694	0.131826	0.332411	chr5	122179134	122365049	3550	+	40.32	q23.2	protein_coding	SNX24	sorting nexin 24 [Source:HGNC Symbol;Acc:21533]
862	ENSG00000064655	110.427	-1.09045	0.380335	-2.86707	0.00414295	0.0311892	chr20	45523263	45817492	3618	+	45.44	q13.12	protein_coding	EYA2	eyes absent homolog 2 (Drosophila) [Source:HGNC Symbol;Acc:3520]
863	ENSG00000064666	331.95	0.354047	0.243953	1.45129	0.146699	0.3564	chr19	1026298	1039068	3928	+	60.01	p13.3	protein_coding	CNN2	calponin 2 [Source:HGNC Symbol;Acc:2156]
864	ENSG00000064687	1618.12	0.667199	0.295521	2.25771	0.023964	0.107997	chr19	1040102	1065571	8365	+	60.48	p13.3	protein_coding	ABCA7	ATP-binding cassette, sub-family A (ABC1), member 7 [Source:HGNC Symbol;Acc:37]
865	ENSG00000064692	183.939	0.726731	0.310401	2.34126	0.0192187	0.0927422	chr5	121647049	121799914	7325	+	39.26	q23.2	protein_coding	SNCAIP	synuclein, alpha interacting protein [Source:HGNC Symbol;Acc:11139]
866	ENSG00000064703	1358.32	-0.208971	0.175664	-1.18961	0.234202	0.473005	chr1	112297867	112310638	6019	+	40.24	p13.2	protein_coding	DDX20	DEAD (Asp-Glu-Ala-Asp) box polypeptide 20 [Source:HGNC Symbol;Acc:2743]
867	ENSG00000064726	26717.6	-0.663669	0.177824	-3.73217	0.000189838	0.00324157	chr15	83685174	83736106	4169	-	39.53	q25.2	protein_coding	BTBD1	BTB (POZ) domain containing 1 [Source:HGNC Symbol;Acc:1120]
868	ENSG00000064763	1435.23	0.0737147	0.116439	0.633078	0.526683	0.743039	chr12	29302036	29493913	5411	+	38.9	p11.22	protein_coding	FAR2	fatty acyl CoA reductase 2 [Source:HGNC Symbol;Acc:25531]
869	ENSG00000064787	70.9847	0.521238	0.507356	1.02736	0.304251	0.551842	chr20	52553316	52687304	9024	-	40.75	q13.2	protein_coding	BCAS1	breast carcinoma amplified sequence 1 [Source:HGNC Symbol;Acc:974]
870	ENSG00000064835	14.6832	-0.840336	0.355651	-2.36281	0.0181369	0.0890704	chr3	87308554	87325737	1569	-	32.4	p11.2	protein_coding	POU1F1	POU class 1 homeobox 1 [Source:HGNC Symbol;Acc:9210]
871	ENSG00000064886	19.9135	1.18866	0.471888	2.51894	0.0117707	0.0660152	chr1	111743393	111786062	3295	+	44.63	p13.3	protein_coding	CHI3L2	chitinase 3-like 2 [Source:HGNC Symbol;Acc:1933]
872	ENSG00000064932	1564.85	-0.498445	0.201741	-2.47072	0.013484	0.0726673	chr19	1107636	1174282	6476	-	63.17	p13.3	protein_coding	SBNO2	strawberry notch homolog 2 (Drosophila) [Source:HGNC Symbol;Acc:29158]
873	ENSG00000064933	1534.51	0.0335584	0.119241	0.281434	0.778378	0.897637	chr2	190649107	190742355	5152	+	36.7	q32.2	protein_coding	PMS1	PMS1 postmeiotic segregation increased 1 (S. cerevisiae) [Source:HGNC Symbol;Acc:9121]
874	ENSG00000064961	905.945	0.116548	0.17036	0.684128	0.493894	0.719319	chr19	3572775	3579086	3857	+	65.34	p13.3	protein_coding	HMG20B	high mobility group 20B [Source:HGNC Symbol;Acc:5002]
875	ENSG00000064989	2095.14	0.279014	0.18294	1.52516	0.127218	0.325051	chr2	188207856	188313187	6144	-	33.09	q32.1	protein_coding	CALCRL	calcitonin receptor-like [Source:HGNC Symbol;Acc:16709]
876	ENSG00000064995	1611.87	-0.00864977	0.139391	-0.062054	0.95052	0.978493	chr6	34845555	34855866	1580	-	41.49	p21.31	protein_coding	TAF11	TAF11 RNA polymerase II, TATA box binding protein (TBP)-associated factor, 28kDa [Source:HGNC Symbol;Acc:11544]
877	ENSG00000064999	2985.79	-0.456424	0.142447	-3.20416	0.00135458	0.0138649	chr6	34857042	35059179	6766	+	44.93	p21.31	protein_coding	ANKS1A	ankyrin repeat and sterile alpha motif domain containing 1A [Source:HGNC Symbol;Acc:20961]
878	ENSG00000065000	6891.12	-0.310658	0.125748	-2.47048	0.0134932	0.0726952	chr19	2100988	2164464	8618	-	56.41	p13.3	protein_coding	AP3D1	adaptor-related protein complex 3, delta 1 subunit [Source:HGNC Symbol;Acc:568]
879	ENSG00000065029	3150.54	-0.936931	0.155546	-6.02351	1.71e-09	2.15e-07	chr6	35226686	35263762	6789	+	48.23	p21.31	protein_coding	ZNF76	zinc finger protein 76 [Source:HGNC Symbol;Acc:13149]
880	ENSG00000065054	2145.42	-0.690155	0.177925	-3.87891	0.000104928	0.00206854	chr16	2075357	2089027	3550	+	64.6	p13.3	protein_coding	SLC9A3R2	solute carrier family 9, subfamily A (NHE3, cation proton antiporter 3), member 3 regulator 2 [Source:HGNC Symbol;Acc:11076]
881	ENSG00000065057	385.744	-0.384567	0.148473	-2.59014	0.00959357	0.0570697	chr16	2089816	2097867	1658	-	61.44	p13.3	protein_coding	NTHL1	nth endonuclease III-like 1 (E. coli) [Source:HGNC Symbol;Acc:8028]
882	ENSG00000065060	7158.33	-0.256591	0.139624	-1.83773	0.0661025	0.213621	chr6	34759857	34850915	9844	+	42.62	p21.31	protein_coding	UHRF1BP1	UHRF1 binding protein 1 [Source:HGNC Symbol;Acc:21216]
883	ENSG00000065135	1775.76	0.0989023	0.0929589	1.06394	0.287358	0.533239	chr1	110091233	110136975	3206	+	38.75	p13.3	protein_coding	GNAI3	guanine nucleotide binding protein (G protein), alpha inhibiting activity polypeptide 3 [Source:HGNC Symbol;Acc:4387]
884	ENSG00000065150	20402.3	-0.178264	0.130428	-1.36676	0.171699	0.393254	chr13	98605912	98676551	9671	+	40.27	q32.2	protein_coding	IPO5	importin 5 [Source:HGNC Symbol;Acc:6402]
885	ENSG00000065154	3821.33	-0.572415	0.246348	-2.32361	0.0201467	0.0958852	chr10	126085872	126107545	3388	-	42.49	q26.13	protein_coding	OAT	ornithine aminotransferase [Source:HGNC Symbol;Acc:8091]
886	ENSG00000065183	2792.42	0.12582	0.115285	1.09138	0.275108	0.520057	chr1	118472343	118509165	10275	+	36.95	p12	protein_coding	WDR3	WD repeat domain 3 [Source:HGNC Symbol;Acc:12755]
887	ENSG00000065243	4477.97	-0.0133579	0.0804728	-0.165993	0.868162	0.94285	chr1	89149905	89301938	7014	+	36.25	p22.2	protein_coding	PKN2	protein kinase N2 [Source:HGNC Symbol;Acc:9406]
888	ENSG00000065268	852.266	-0.293885	0.211832	-1.38735	0.165335	0.383927	chr19	983174	994569	2474	+	62.14	p13.3	protein_coding	WDR18	WD repeat domain 18 [Source:HGNC Symbol;Acc:17956]
889	ENSG00000065308	1380.85	0.161994	0.191102	0.847681	0.396616	0.639825	chr6	52362200	52441713	6908	-	46.6	p12.2	protein_coding	TRAM2	translocation associated membrane protein 2 [Source:HGNC Symbol;Acc:16855]
890	ENSG00000065320	615.446	-0.018029	0.275137	-0.0655275	0.947754	0.977538	chr17	8924859	9147317	6431	+	49.77	p13.1	protein_coding	NTN1	netrin 1 [Source:HGNC Symbol;Acc:8029]
891	ENSG00000065325	8.67949	-0.838979	0.847648	-0.989772	0.322286	0.570321	chr17	9725523	9795419	6052	+	44.97	p13.1	protein_coding	GLP2R	glucagon-like peptide 2 receptor [Source:HGNC Symbol;Acc:4325]
892	ENSG00000065328	71.6789	-0.815067	0.427685	-1.90577	0.0566806	0.19379	chr10	13203554	13253104	5454	+	43.59	p13	protein_coding	MCM10	minichromosome maintenance complex component 10 [Source:HGNC Symbol;Acc:18043]
893	ENSG00000065357	332.366	0.0412366	0.164974	0.249958	0.80262	0.91062	chr12	56321103	56347811	10215	+	48.71	q13.2	protein_coding	DGKA	diacylglycerol kinase, alpha 80kDa [Source:HGNC Symbol;Acc:2849]
894	ENSG00000065361	1315.72	1.67233	0.522451	3.20093	0.00136986	0.0139736	chr12	56473641	56497289	8651	+	49.92	q13.2	protein_coding	ERBB3	v-erb-b2 avian erythroblastic leukemia viral oncogene homolog 3 [Source:HGNC Symbol;Acc:3431]
895	ENSG00000065371	42.3816	-0.497257	0.331207	-1.50135	0.133265	0.334734	chr3	123687368	123711025	4395	-	42.25	q21.1	protein_coding	ROPN1	rhophilin associated tail protein 1 [Source:HGNC Symbol;Acc:17692]
896	ENSG00000065413	893.516	0.18513	0.147212	1.25758	0.208544	0.441691	chr2	197831741	198175897	9228	-	40.24	q33.1	protein_coding	ANKRD44	ankyrin repeat domain 44 [Source:HGNC Symbol;Acc:25259]
897	ENSG00000065427	10001.5	-0.418005	0.0863541	-4.84059	1.29e-06	6.22e-05	chr16	75661622	75682541	3815	-	45.68	q23.1	protein_coding	KARS	lysyl-tRNA synthetase [Source:HGNC Symbol;Acc:6215]
898	ENSG00000065457	1069.92	0.309475	0.228679	1.35332	0.175954	0.398972	chr16	75630879	75657198	4486	-	44.65	q23.1	protein_coding	ADAT1	adenosine deaminase, tRNA-specific 1 [Source:HGNC Symbol;Acc:228]
899	ENSG00000065485	636.673	-0.0218317	0.121275	-0.180019	0.857138	0.936998	chr3	122785909	122944074	4030	+	45.21	q21.1	protein_coding	PDIA5	protein disulfide isomerase family A, member 5 [Source:HGNC Symbol;Acc:24811]	MI0022961	hsa-mir-7110
900	ENSG00000065491	1256.72	0.198234	0.163732	1.21073	0.225999	0.463226	chr6	37225548	37300746	3462	+	43.34	p21.2	protein_coding	TBC1D22B	TBC1 domain family, member 22B [Source:HGNC Symbol;Acc:21602]
901	ENSG00000065518	7822.08	-0.669598	0.158156	-4.23379	2.3e-05	0.000634487	chr3	120315156	120321347	1889	+	39.39	q13.33	protein_coding	NDUFB4	NADH dehydrogenase (ubiquinone) 1 beta subcomplex, 4, 15kDa [Source:HGNC Symbol;Acc:7699]
902	ENSG00000065526	10400.3	-0.233254	0.1547	-1.50779	0.131609	0.332026	chr1	16174359	16266955	13294	+	42.99	p36.21	protein_coding	SPEN	spen family transcriptional repressor [Source:HGNC Symbol;Acc:17575]
903	ENSG00000065534	3154.69	0.554977	0.215151	2.57948	0.00989498	0.058294	chr3	123328896	123603178	22166	-	45.34	q21.1	protein_coding	MYLK	myosin light chain kinase [Source:HGNC Symbol;Acc:7590]
904	ENSG00000065548	3960.8	0.135609	0.0995345	1.36243	0.173061	0.395268	chr2	187350883	187374090	3125	+	37.22	q32.1	protein_coding	ZC3H15	zinc finger CCCH-type containing 15 [Source:HGNC Symbol;Acc:29528]
905	ENSG00000065559	4084.38	-0.0287915	0.157369	-0.182955	0.854833	0.936132	chr17	11924141	12047147	5714	+	37.09	p12	protein_coding	MAP2K4	mitogen-activated protein kinase kinase 4 [Source:HGNC Symbol;Acc:6844]
906	ENSG00000065600	345.601	-0.0329354	0.12975	-0.253838	0.799621	0.909197	chr1	212537273	212588243	2914	-	44.57	q32.3	protein_coding	TMEM206	transmembrane protein 206 [Source:HGNC Symbol;Acc:25593]
907	ENSG00000065609	32.3886	-1.08599	0.621357	-1.74778	0.0805029	0.242691	chr6	84262599	84419410	6657	-	36.62	q14.2	protein_coding	SNAP91	synaptosomal-associated protein, 91kDa [Source:HGNC Symbol;Acc:14986]
908	ENSG00000065613	10729.8	0.382836	0.115044	3.32773	0.000875582	0.0101259	chr10	105726959	105788991	7974	+	36.55	q24.33	protein_coding	SLK	STE20-like kinase [Source:HGNC Symbol;Acc:11088]
909	ENSG00000065615	1380.9	-0.414079	0.138246	-2.99524	0.00274229	0.0231982	chr6	84569362	84677143	9635	+	37.46	q14.2	protein_coding	CYB5R4	cytochrome b5 reductase 4 [Source:HGNC Symbol;Acc:20147]
910	ENSG00000065618	97.8235	-0.0912654	0.176696	-0.516511	0.605498	0.795204	chr10	105791044	105845760	6426	-	48.31	q25.1	protein_coding	COL17A1	collagen, type XVII, alpha 1 [Source:HGNC Symbol;Acc:2194]
911	ENSG00000065621	203.318	-0.0318578	0.264143	-0.120608	0.904001	0.959004	chr10	106028631	106064703	10344	+	43.48	q25.1	protein_coding	GSTO2	glutathione S-transferase omega 2 [Source:HGNC Symbol;Acc:23064]
912	ENSG00000065665	789.431	0.0374226	0.110916	0.337395	0.735819	0.874544	chr10	12171636	12211960	3916	+	43.14	p14	protein_coding	SEC61A2	Sec61 alpha 2 subunit (S. cerevisiae) [Source:HGNC Symbol;Acc:17702]
913	ENSG00000065675	10506.2	-0.837585	0.160511	-5.21824	1.81e-07	1.25e-05	chr10	6469105	6622263	3285	-	43.1	p14	protein_coding	PRKCQ	protein kinase C, theta [Source:HGNC Symbol;Acc:9410]
914	ENSG00000065717	2365.12	-1.29528	0.349983	-3.70099	0.000214763	0.00355969	chr19	2997636	3047633	4038	-	54.67	p13.3	protein_coding	TLE2	transducin-like enhancer of split 2 (E(sp1) homolog, Drosophila) [Source:HGNC Symbol;Acc:11838]
915	ENSG00000065802	5044.09	0.0360937	0.217666	0.165821	0.868298	0.942876	chr2	239335383	239360891	7410	+	47.31	q37.3	protein_coding	ASB1	ankyrin repeat and SOCS box containing 1 [Source:HGNC Symbol;Acc:16011]
916	ENSG00000065809	527.443	0.370711	0.249491	1.48587	0.137314	0.341251	chr10	14560556	14816896	7019	-	43.19	p13	protein_coding	FAM107B	family with sequence similarity 107, member B [Source:HGNC Symbol;Acc:23726]
917	ENSG00000065833	4076.86	-0.208685	0.208989	-0.998542	0.318017	0.565632	chr6	83920108	84140797	3378	-	36.91	q14.2	protein_coding	ME1	malic enzyme 1, NADP(+)-dependent, cytosolic [Source:HGNC Symbol;Acc:6983]
918	ENSG00000065882	9165.69	-1.33811	0.25121	-5.32667	1e-07	7.58e-06	chr4	37892708	38140796	9027	+	42.84	p14	protein_coding	TBC1D1	TBC1 (tre-2/USP6, BUB2, cdc16) domain family, member 1 [Source:HGNC Symbol;Acc:11578]
919	ENSG00000065883	5931.51	-0.0610848	0.110048	-0.555076	0.578843	0.778285	chr7	39989636	40136733	8921	+	38.87	p14.1	protein_coding	CDK13	cyclin-dependent kinase 13 [Source:HGNC Symbol;Acc:1733]
920	ENSG00000065911	4071.52	0.483597	0.37584	1.28671	0.198195	0.428678	chr2	74425689	74444692	4870	+	43.3	p13.1	protein_coding	MTHFD2	methylenetetrahydrofolate dehydrogenase (NADP+ dependent) 2, methenyltetrahydrofolate cyclohydrolase [Source:HGNC Symbol;Acc:7434]
921	ENSG00000065923	1827.39	0.609988	0.278899	2.18713	0.0287329	0.122121	chrX	46464753	46618490	3838	-	41.02	p11.23	protein_coding	SLC9A7	solute carrier family 9, subfamily A (NHE7, cation proton antiporter 7), member 7 [Source:HGNC Symbol;Acc:17123]
922	ENSG00000065970	2690.53	-0.580198	0.209631	-2.76772	0.00564506	0.0389964	chr12	8185299	8208099	6296	+	47.57	p13.31	protein_coding	FOXJ2	forkhead box J2 [Source:HGNC Symbol;Acc:24818]
923	ENSG00000065978	41494.7	-0.306066	0.157362	-1.94498	0.0517771	0.182783	chr1	43148098	43168020	1930	+	40.41	p34.2	protein_coding	YBX1	Y box binding protein 1 [Source:HGNC Symbol;Acc:8014]
924	ENSG00000065989	1580.56	-1.27589	0.274811	-4.64279	3.44e-06	0.000135915	chr19	10527449	10580305	6644	+	54.53	p13.2	protein_coding	PDE4A	phosphodiesterase 4A, cAMP-specific [Source:HGNC Symbol;Acc:8780]
925	ENSG00000066027	5392.52	-0.61837	0.216646	-2.85428	0.00431344	0.032135	chr1	212458879	212535200	3820	+	39.28	q32.3	protein_coding	PPP2R5A	protein phosphatase 2, regulatory subunit B', alpha [Source:HGNC Symbol;Acc:9309]
926	ENSG00000066032	26.5877	-0.866073	0.93197	-0.929293	0.352737	0.599731	chr2	79412357	80875905	7538	+	38.65	p12	protein_coding	CTNNA2	catenin (cadherin-associated protein), alpha 2 [Source:HGNC Symbol;Acc:2510]
927	ENSG00000066044	1952.15	-0.30013	0.172747	-1.7374	0.0823168	0.246553	chr19	8023463	8070543	6956	-	52.21	p13.2	protein_coding	ELAVL1	ELAV like RNA binding protein 1 [Source:HGNC Symbol;Acc:3312]
928	ENSG00000066056	1920.47	-0.505611	0.165695	-3.05145	0.00227741	0.0201665	chr1	43766664	43788779	6694	+	54.59	p34.2	protein_coding	TIE1	tyrosine kinase with immunoglobulin-like and EGF-like domains 1 [Source:HGNC Symbol;Acc:11809]
929	ENSG00000066084	4507.46	0.362933	0.098338	3.69067	0.000223664	0.00366024	chr12	50898768	51142450	10361	+	41.84	q13.12	protein_coding	DIP2B	DIP2 disco-interacting protein 2 homolog B (Drosophila) [Source:HGNC Symbol;Acc:29284]
930	ENSG00000066117	1412.77	-0.0541495	0.109868	-0.492857	0.622113	0.805615	chr12	50478755	50494495	5136	+	48.68	q13.12	protein_coding	SMARCD1	SWI/SNF related, matrix associated, actin dependent regulator of chromatin, subfamily d, member 1 [Source:HGNC Symbol;Acc:11106]
931	ENSG00000066135	2791.25	0.205004	0.107118	1.91382	0.0556435	0.191354	chr1	44115829	44171186	5172	+	46.75	p34.1	protein_coding	KDM4A	lysine (K)-specific demethylase 4A [Source:HGNC Symbol;Acc:22978]
932	ENSG00000066136	3087.4	-0.156812	0.11683	-1.34222	0.179526	0.40351	chr1	41157320	41237275	5990	+	42.65	p34.2	protein_coding	NFYC	nuclear transcription factor Y, gamma [Source:HGNC Symbol;Acc:7806]
933	ENSG00000066185	150.905	0.0484233	0.261786	0.184973	0.85325	0.93538	chr1	42896000	42921938	2195	-	42.83	p34.2	protein_coding	ZMYND12	zinc finger, MYND-type containing 12 [Source:HGNC Symbol;Acc:21192]
934	ENSG00000066230	214.496	0.430104	0.34472	1.24769	0.212145	0.446296	chr5	473425	524447	2783	-	61.34	p15.33	protein_coding	SLC9A3	solute carrier family 9, subfamily A (NHE3, cation proton antiporter 3), member 3 [Source:HGNC Symbol;Acc:11073]
935	ENSG00000066248	97.0501	0.381394	0.37927	1.0056	0.314608	0.562545	chr2	233743396	233877982	4687	-	48.38	q37.1	protein_coding	NGEF	neuronal guanine nucleotide exchange factor [Source:HGNC Symbol;Acc:7807]
936	ENSG00000066279	101.107	0.516189	0.276919	1.86404	0.0623161	0.205425	chr1	197053258	197115824	10887	-	34.66	q31.3	protein_coding	ASPM	asp (abnormal spindle) homolog, microcephaly associated (Drosophila) [Source:HGNC Symbol;Acc:19048]
937	ENSG00000066294	471.367	0.881673	0.259901	3.39234	0.000692976	0.00857945	chr1	160510885	160549306	9255	-	41.6	q23.3	protein_coding	CD84	CD84 molecule [Source:HGNC Symbol;Acc:1704]
938	ENSG00000066322	630.918	0.132986	0.135397	0.982197	0.326003	0.574187	chr1	43829068	43833696	2458	-	58.52	p34.2	protein_coding	ELOVL1	ELOVL fatty acid elongase 1 [Source:HGNC Symbol;Acc:14418]	MI0022579	hsa-mir-6734
939	ENSG00000066336	166.648	0.247234	0.229862	1.07558	0.282115	0.527379	chr11	47376411	47400127	2069	-	52.62	p11.2	protein_coding	SPI1	spleen focus forming virus (SFFV) proviral integration oncogene [Source:HGNC Symbol;Acc:11241]
940	ENSG00000066379	681.653	0.119085	0.139506	0.853619	0.393316	0.636589	chr6	30026676	30032686	3672	+	41.39	p22.1	protein_coding	ZNRD1	zinc ribbon domain containing 1 [Source:HGNC Symbol;Acc:13182]
941	ENSG00000066382	567.924	-0.791412	0.361365	-2.19007	0.0285195	0.121487	chr11	30406040	30608419	8198	-	40.01	p14.1	protein_coding	MPPED2	metallophosphoesterase domain containing 2 [Source:HGNC Symbol;Acc:1180]
942	ENSG00000066405	76.7745	0.281155	0.341372	0.823603	0.410165	0.651894	chr3	137717577	137752494	3877	+	42.94	q22.3	protein_coding	CLDN18	claudin 18 [Source:HGNC Symbol;Acc:2039]
943	ENSG00000066422	3484.64	-0.106313	0.108209	-0.982485	0.325861	0.574141	chr3	101367733	101396339	7416	-	40.45	q12.3	protein_coding	ZBTB11	zinc finger and BTB domain containing 11 [Source:HGNC Symbol;Acc:16740]
944	ENSG00000066427	2148.19	0.197579	0.129386	1.52704	0.12675	0.324202	chr14	92524896	92572965	8470	-	41.5	q32.12	protein_coding	ATXN3	ataxin 3 [Source:HGNC Symbol;Acc:7106]
945	ENSG00000066455	2280.75	-0.02467	0.0976736	-0.252576	0.800596	0.909557	chr14	93260576	93306308	3295	+	39.61	q32.12	protein_coding	GOLGA5	golgin A5 [Source:HGNC Symbol;Acc:4428]
946	ENSG00000066468	33.6795	0.543181	0.509965	1.06513	0.286815	0.532677	chr10	123237848	123357972	7543	-	45.41	q26.13	protein_coding	FGFR2	fibroblast growth factor receptor 2 [Source:HGNC Symbol;Acc:3689]
947	ENSG00000066557	1180.98	0.0270216	0.103778	0.260379	0.794571	0.906376	chr1	70610488	70671303	2884	-	35.14	p31.1	protein_coding	LRRC40	leucine rich repeat containing 40 [Source:HGNC Symbol;Acc:26004]
948	ENSG00000066583	754.606	0.378895	0.145096	2.61134	0.0090187	0.0545711	chr5	128430444	128449721	1940	+	38.93	q23.3	protein_coding	ISOC1	isochorismatase domain containing 1 [Source:HGNC Symbol;Acc:24254]
949	ENSG00000066629	4068.4	-1.19705	0.339039	-3.53071	0.000414454	0.00581561	chr14	100204030	100408397	8899	+	45.19	q32.2	protein_coding	EML1	echinoderm microtubule associated protein like 1 [Source:HGNC Symbol;Acc:3330]
950	ENSG00000066651	1535.86	0.0908584	0.140918	0.644762	0.519082	0.73662	chr6	126307576	126360422	2690	+	36.02	q22.32	protein_coding	TRMT11	tRNA methyltransferase 11 homolog (S. cerevisiae) [Source:HGNC Symbol;Acc:21080]
951	ENSG00000066654	3638.26	-0.19157	0.112651	-1.70057	0.0890242	0.259044	chr16	20744986	20753406	5092	-	41.76	p12.3	protein_coding	THUMPD1	THUMP domain containing 1 [Source:HGNC Symbol;Acc:23807]
952	ENSG00000066697	891.499	-0.0149302	0.194099	-0.0769206	0.938687	0.974064	chr9	103189438	103213511	2763	+	43.88	q31.1	protein_coding	MSANTD3	Myb/SANT-like DNA-binding domain containing 3 [Source:HGNC Symbol;Acc:23370]
953	ENSG00000066735	766.47	-0.208104	0.227524	-0.914649	0.360376	0.607004	chr14	104605060	104647231	6756	+	63.77	q32.33	protein_coding	KIF26A	kinesin family member 26A [Source:HGNC Symbol;Acc:20226]
954	ENSG00000066739	8519.6	0.101291	0.08291	1.2217	0.221823	0.458176	chr14	96747595	96830207	12722	-	37.1	q32.2	protein_coding	ATG2B	autophagy related 2B [Source:HGNC Symbol;Acc:20187]
955	ENSG00000066777	7546.21	0.0123717	0.100944	0.12256	0.902456	0.95834	chr8	68085747	68255912	10970	-	38.36	q13.2	protein_coding	ARFGEF1	ADP-ribosylation factor guanine nucleotide-exchange factor 1 (brefeldin A-inhibited) [Source:HGNC Symbol;Acc:15772]
956	ENSG00000066813	5.81102	-1.54521	0.88125	-1.75342	0.0795292	0.240906	chr16	20547548	20587749	8155	-	39.17	p12.3	protein_coding	ACSM2B	acyl-CoA synthetase medium-chain family member 2B [Source:HGNC Symbol;Acc:30931]
957	ENSG00000066827	1571.01	-0.137223	0.0983372	-1.39544	0.162884	0.380427	chr8	135490031	135725292	8900	-	44.79	q24.22	protein_coding	ZFAT	zinc finger and AT hook domain containing [Source:HGNC Symbol;Acc:19899]
958	ENSG00000066855	2229.73	-0.20188	0.177425	-1.13783	0.255191	0.497857	chr8	66556969	66683496	4629	+	40.22	q13.1	protein_coding	MTFR1	mitochondrial fission regulator 1 [Source:HGNC Symbol;Acc:29510]
959	ENSG00000066923	11394	-0.806096	0.226048	-3.56604	0.000362417	0.00527043	chr7	99775186	99819111	8583	+	47.11	q22.1	protein_coding	STAG3	stromal antigen 3 [Source:HGNC Symbol;Acc:11356]
960	ENSG00000066926	3798.33	0.0259857	0.184667	0.140717	0.888094	0.952081	chr18	55215515	55254004	4473	-	42.66	q21.31	protein_coding	FECH	ferrochelatase [Source:HGNC Symbol;Acc:3647]
961	ENSG00000066933	12098.2	0.118681	0.155659	0.762444	0.445795	0.68151	chr15	72114632	72410918	20250	-	37.93	q23	protein_coding	MYO9A	myosin IXA [Source:HGNC Symbol;Acc:7608]
962	ENSG00000067048	3195.25	-1.24627	1.74194	-0.71545	0.474331	0.703847	chrY	15016019	15032390	5738	+	37.69	q11.21	protein_coding	DDX3Y	DEAD (Asp-Glu-Ala-Asp) box helicase 3, Y-linked [Source:HGNC Symbol;Acc:2699]
963	ENSG00000067057	3744.6	2.20353	0.464773	4.74108	2.13e-06	9.24e-05	chr10	3108525	3179904	4827	+	51.44	p15.2	protein_coding	PFKP	phosphofructokinase, platelet [Source:HGNC Symbol;Acc:8878]
964	ENSG00000067064	7393.06	-0.340365	0.286756	-1.18695	0.235248	0.474026	chr10	1085848	1095110	3589	-	43.32	p15.3	protein_coding	IDI1	isopentenyl-diphosphate delta isomerase 1 [Source:HGNC Symbol;Acc:5387]
965	ENSG00000067066	3169.43	-0.442781	0.389303	-1.13737	0.255384	0.498087	chr2	231280657	231408805	12691	+	39.2	q37.1	protein_coding	SP100	SP100 nuclear antigen [Source:HGNC Symbol;Acc:11206]
966	ENSG00000067082	2944.31	-0.289563	0.219259	-1.32064	0.186621	0.412956	chr10	3818188	3827473	6139	-	48.08	p15.1	protein_coding	KLF6	Kruppel-like factor 6 [Source:HGNC Symbol;Acc:2235]
967	ENSG00000067113	3296.5	-0.184145	0.173095	-1.06384	0.287401	0.533239	chr5	54720682	54830878	2016	-	39.62	q11.2	protein_coding	PPAP2A	phosphatidic acid phosphatase type 2A [Source:HGNC Symbol;Acc:9228]
968	ENSG00000067141	7300.37	-0.895585	0.159209	-5.62523	1.85e-08	1.79e-06	chr15	73344051	73597547	8117	+	38.73	q24.1	protein_coding	NEO1	neogenin 1 [Source:HGNC Symbol;Acc:7754]
969	ENSG00000067167	3435.42	0.0701695	0.100269	0.69981	0.484046	0.71187	chr8	71485677	71520622	3878	-	38.27	q13.3	protein_coding	TRAM1	translocation associated membrane protein 1 [Source:HGNC Symbol;Acc:20568]
970	ENSG00000067177	19279.1	-1.49964	0.289606	-5.1782	2.24e-07	1.51e-05	chrX	71798664	71934167	6350	-	37.87	q13.2	protein_coding	PHKA1	phosphorylase kinase, alpha 1 (muscle) [Source:HGNC Symbol;Acc:8925]
971	ENSG00000067182	2430.09	-0.268809	0.155097	-1.73316	0.0830667	0.248138	chr12	6437923	6451280	4005	-	54.07	p13.31	protein_coding	TNFRSF1A	tumor necrosis factor receptor superfamily, member 1A [Source:HGNC Symbol;Acc:11916]
972	ENSG00000067191	18693.7	-0.424242	0.152668	-2.77885	0.0054552	0.0381101	chr17	37329709	37353956	7094	-	54.39	q12	protein_coding	CACNB1	calcium channel, voltage-dependent, beta 1 subunit [Source:HGNC Symbol;Acc:1401]
973	ENSG00000067208	2572.9	-0.0203965	0.126217	-0.161599	0.871622	0.944156	chr1	92974253	93257961	8276	-	38.19	p22.1	protein_coding	EVI5	ecotropic viral integration site 5 [Source:HGNC Symbol;Acc:3501]
974	ENSG00000067221	980.454	0.362267	0.159671	2.26883	0.0232788	0.105868	chr15	74275547	74286963	6178	-	55.06	q24.1	protein_coding	STOML1	stomatin (EPB72)-like 1 [Source:HGNC Symbol;Acc:14560]
975	ENSG00000067225	118503	-0.741353	0.456454	-1.62416	0.104342	0.286633	chr15	72491370	72524164	8572	-	48.38	q23	protein_coding	PKM	pyruvate kinase, muscle [Source:HGNC Symbol;Acc:9021]
976	ENSG00000067248	5107.57	-0.262543	0.0973794	-2.69608	0.00701608	0.0455722	chr5	54552073	54603550	4728	-	37.08	q11.2	protein_coding	DHX29	DEAH (Asp-Glu-Ala-His) box polypeptide 29 [Source:HGNC Symbol;Acc:15815]
977	ENSG00000067334	3612.87	-0.15503	0.126573	-1.22483	0.220639	0.456663	chr1	94333373	94345474	5985	-	38.94	p22.1	protein_coding	DNTTIP2	deoxynucleotidyltransferase, terminal, interacting protein 2 [Source:HGNC Symbol;Acc:24013]
978	ENSG00000067365	1933.31	-0.308145	0.105967	-2.90794	0.00363823	0.0284248	chr16	8715540	8740081	4824	+	49.53	p13.2	protein_coding	METTL22	methyltransferase like 22 [Source:HGNC Symbol;Acc:28368]
979	ENSG00000067369	4941.56	0.33364	0.177217	1.88267	0.0597452	0.200272	chr15	43699407	43802926	8843	-	41.71	q15.3	protein_coding	TP53BP1	tumor protein p53 binding protein 1 [Source:HGNC Symbol;Acc:11999]
980	ENSG00000067445	2339.74	-0.659642	0.24791	-2.66082	0.00779516	0.0493584	chrX	54946895	54957864	6716	+	51.41	p11.21	protein_coding	TRO	trophinin [Source:HGNC Symbol;Acc:12326]
981	ENSG00000067533	4361.54	0.224017	0.122236	1.83265	0.0668542	0.215199	chr1	218458629	218511325	7883	+	37.64	q41	protein_coding	RRP15	ribosomal RNA processing 15 homolog (S. cerevisiae) [Source:HGNC Symbol;Acc:24255]
982	ENSG00000067560	15199.3	-0.0626768	0.0938595	-0.667773	0.504278	0.726269	chr3	49396578	49450431	2582	-	46.57	p21.31	protein_coding	RHOA	ras homolog family member A [Source:HGNC Symbol;Acc:667]
983	ENSG00000067596	3149.52	0.0869083	0.111744	0.777743	0.436721	0.674497	chr17	41561233	41621831	9302	+	46.36	q21.31	protein_coding	DHX8	DEAH (Asp-Glu-Ala-His) box polypeptide 8 [Source:HGNC Symbol;Acc:2749]
984	ENSG00000067601	594.4	0.266186	0.132473	2.00936	0.0444986	0.165021	chr7	66752528	66767894	1327	-	43.85	q11.21	pseudogene	PMS2P4	postmeiotic segregation increased 2 pseudogene 4 [Source:HGNC Symbol;Acc:9129]
985	ENSG00000067606	156.194	0.158764	0.157853	1.00577	0.314524	0.562507	chr1	1981909	2116834	7636	+	56.44	p36.33	protein_coding	PRKCZ	protein kinase C, zeta [Source:HGNC Symbol;Acc:9412]
986	ENSG00000067646	1434.83	-0.812748	1.4651	-0.554738	0.579074	0.77837	chrY	2803112	2850547	5737	+	37.41	p11.31	protein_coding	ZFY	zinc finger protein, Y-linked [Source:HGNC Symbol;Acc:12870]
987	ENSG00000067704	9435.78	0.023175	0.170058	0.136277	0.891602	0.953767	chr1	220267444	220321380	4162	+	39.21	q41	protein_coding	IARS2	isoleucyl-tRNA synthetase 2, mitochondrial [Source:HGNC Symbol;Acc:29685]
988	ENSG00000067715	47.1316	0.162159	0.336207	0.482318	0.62958	0.810108	chr12	79257773	79845788	6494	+	35.61	q21.2	protein_coding	SYT1	synaptotagmin I [Source:HGNC Symbol;Acc:11509]
989	ENSG00000067798	1289.1	-0.331971	0.386643	-0.8586	0.390561	0.634156	chr12	78224685	78606790	11179	+	34.97	q21.2	protein_coding	NAV3	neuron navigator 3 [Source:HGNC Symbol;Acc:15998]
990	ENSG00000067829	2997.25	-0.0535654	0.13388	-0.400101	0.689082	0.847497	chrX	153051221	153059978	2710	-	58.77	q28	protein_coding	IDH3G	isocitrate dehydrogenase 3 (NAD+) gamma [Source:HGNC Symbol;Acc:5386]
991	ENSG00000067836	1838.31	0.0666099	0.230463	0.289027	0.772561	0.894282	chr16	4846969	4852951	3683	-	63.26	p13.3	protein_coding	ROGDI	rogdi homolog (Drosophila) [Source:HGNC Symbol;Acc:29478]
992	ENSG00000067840	255.087	0.512344	0.346698	1.47778	0.139466	0.344813	chrX	153067621	153096020	4381	-	56.35	q28	protein_coding	PDZD4	PDZ domain containing 4 [Source:HGNC Symbol;Acc:21167]
993	ENSG00000067842	13.6643	1.46493	0.496428	2.95095	0.003168	0.0257764	chrX	152783134	152848397	7534	+	58.21	q28	protein_coding	ATP2B3	ATPase, Ca++ transporting, plasma membrane 3 [Source:HGNC Symbol;Acc:816]
994	ENSG00000067900	5760.31	0.00112307	0.070439	0.0159439	0.987279	0.994009	chr18	18526867	18691812	11064	-	36.92	q11.1	protein_coding	ROCK1	Rho-associated, coiled-coil containing protein kinase 1 [Source:HGNC Symbol;Acc:10251]
995	ENSG00000067955	2428.8	0.107235	0.243314	0.440726	0.659412	0.829235	chr16	67063019	67134961	4129	+	40.45	q22.1	protein_coding	CBFB	core-binding factor, beta subunit [Source:HGNC Symbol;Acc:1539]
996	ENSG00000067992	392.316	0.540387	0.304947	1.77207	0.0763826	0.235061	chrX	24483338	24557954	2695	+	40.95	p22.11	protein_coding	PDK3	pyruvate dehydrogenase kinase, isozyme 3 [Source:HGNC Symbol;Acc:8811]
997	ENSG00000068001	1559.36	-0.312712	0.266921	-1.17155	0.241377	0.481416	chr3	50355221	50360337	4545	-	61.05	p21.31	protein_coding	HYAL2	hyaluronoglucosaminidase 2 [Source:HGNC Symbol;Acc:5321]
998	ENSG00000068024	16687.1	0.196202	0.190468	1.0301	0.302963	0.550533	chr2	239969864	240323348	13443	-	51.33	q37.3	protein_coding	HDAC4	histone deacetylase 4 [Source:HGNC Symbol;Acc:14063]
999	ENSG00000068028	862.132	-0.033444	0.14862	-0.225031	0.821955	0.920383	chr3	50367219	50378411	3677	-	54.56	p21.31	protein_coding	RASSF1	Ras association (RalGDS/AF-6) domain family member 1 [Source:HGNC Symbol;Acc:9882]
1000	ENSG00000068078	73.8514	0.223729	0.3754	0.595974	0.551193	0.760092	chr4	1795034	1810599	4834	+	65.82	p16.3	protein_coding	FGFR3	fibroblast growth factor receptor 3 [Source:HGNC Symbol;Acc:3690]
1001	ENSG00000068097	1674.58	-0.227628	0.145502	-1.56444	0.117715	0.309248	chr17	58120555	58156292	4866	-	40.4	q23.1	protein_coding	HEATR6	HEAT repeat containing 6 [Source:HGNC Symbol;Acc:24076]
1002	ENSG00000068120	1320.1	-0.152029	0.119859	-1.2684	0.204655	0.437031	chr17	40713485	40718295	4032	+	57.56	q21.2	protein_coding	COASY	CoA synthase [Source:HGNC Symbol;Acc:29932]
1003	ENSG00000068137	3666.72	-0.616495	0.277855	-2.21876	0.0265027	0.115501	chr17	40819932	40829048	4839	-	62.07	q21.2	protein_coding	PLEKHH3	pleckstrin homology domain containing, family H (with MyTH4 domain) member 3 [Source:HGNC Symbol;Acc:26105]
1004	ENSG00000068305	13759.4	0.0393363	0.127276	0.309063	0.757273	0.885705	chr15	100017370	100256671	7030	+	39.28	q26.3	protein_coding	MEF2A	myocyte enhancer factor 2A [Source:HGNC Symbol;Acc:6993]
1005	ENSG00000068308	1942.66	-0.246278	0.116669	-2.1109	0.0347805	0.139331	chrX	48779305	48815648	3329	-	49.97	p11.23	protein_coding	OTUD5	OTU domain containing 5 [Source:HGNC Symbol;Acc:25402]
1006	ENSG00000068323	1367.3	-0.0799973	0.12218	-0.654748	0.51263	0.732288	chrX	48886242	48901012	4278	-	52.52	p11.23	protein_coding	TFE3	transcription factor binding to IGHM enhancer 3 [Source:HGNC Symbol;Acc:11752]
1007	ENSG00000068354	512.184	-0.105876	0.217393	-0.487023	0.626242	0.808198	chrX	48397845	48420997	4223	+	48.17	p11.23	protein_coding	TBC1D25	TBC1 domain family, member 25 [Source:HGNC Symbol;Acc:8092]
1008	ENSG00000068366	3437.44	-0.311845	0.316555	-0.985121	0.324565	0.572748	chrX	108867473	108976632	6415	-	39.16	q23	protein_coding	ACSL4	acyl-CoA synthetase long-chain family member 4 [Source:HGNC Symbol;Acc:3571]
1009	ENSG00000068383	4790.84	-0.818721	0.212876	-3.84601	0.000120058	0.00228777	chr10	134351324	134596979	3701	+	54.13	q26.3	protein_coding	INPP5A	inositol polyphosphate-5-phosphatase, 40kDa [Source:HGNC Symbol;Acc:6076]
1010	ENSG00000068394	1702.95	-0.143988	0.125146	-1.15056	0.249914	0.491898	chrX	48970334	48980151	1735	-	51.16	p11.23	protein_coding	GPKOW	G patch domain and KOW motifs [Source:HGNC Symbol;Acc:30677]
1011	ENSG00000068400	1465.29	-0.050636	0.103095	-0.491161	0.623312	0.806326	chrX	48830134	48858675	5779	-	50.23	p11.23	protein_coding	GRIPAP1	GRIP1 associated protein 1 [Source:HGNC Symbol;Acc:18706]
1012	ENSG00000068438	1077.9	0.0726101	0.0852273	0.851959	0.394237	0.63742	chrX	48334541	48344752	2740	+	50.5	p11.23	protein_coding	FTSJ1	FtsJ RNA methyltransferase homolog 1 (E. coli) [Source:HGNC Symbol;Acc:13254]
1013	ENSG00000068489	64.465	0.620127	0.230854	2.68623	0.00722639	0.0465683	chr17	57232860	57282066	4080	+	44.47	q22	protein_coding	PRR11	proline rich 11 [Source:HGNC Symbol;Acc:25619]
1014	ENSG00000068615	2985.38	0.0354563	0.291929	0.121455	0.903331	0.958731	chr2	86441116	86565206	5326	-	46.05	p11.2	protein_coding	REEP1	receptor accessory protein 1 [Source:HGNC Symbol;Acc:25786]
1015	ENSG00000068650	3219.12	-0.826933	0.221713	-3.72975	0.000191672	0.00326359	chr13	113344643	113541482	12172	+	50.33	q34	protein_coding	ATP11A	ATPase, class VI, type 11A [Source:HGNC Symbol;Acc:13552]
1016	ENSG00000068654	6075.49	-0.0320137	0.120324	-0.266063	0.790191	0.904073	chr2	86247339	86333278	13519	-	46.69	p11.2	protein_coding	POLR1A	polymerase (RNA) I polypeptide A, 194kDa [Source:HGNC Symbol;Acc:17264]
1017	ENSG00000068697	3876.02	-0.0714238	0.122819	-0.581536	0.560879	0.766778	chr2	20232411	20251789	1946	-	41.61	p24.1	protein_coding	LAPTM4A	lysosomal protein transmembrane 4 alpha [Source:HGNC Symbol;Acc:6924]
1018	ENSG00000068724	1209.49	0.460717	0.138525	3.32587	0.00088142	0.010163	chr2	47143296	47303276	6949	+	50.88	p21	protein_coding	TTC7A	tetratricopeptide repeat domain 7A [Source:HGNC Symbol;Acc:19750]
1019	ENSG00000068745	2264.59	0.217665	0.110426	1.97113	0.0487085	0.175285	chr3	48725436	48777786	5624	-	47.61	p21.31	protein_coding	IP6K2	inositol hexakisphosphate kinase 2 [Source:HGNC Symbol;Acc:17313]
1020	ENSG00000068781	287.357	-0.121303	0.168986	-0.717828	0.472863	0.70248	chr2	48757064	49003654	4294	+	40.98	p16.3	protein_coding	STON1-GTF2A1L	STON1-GTF2A1L readthrough [Source:HGNC Symbol;Acc:30651]
1021	ENSG00000068784	1191.77	0.0496082	0.141614	0.350306	0.726109	0.869003	chr2	45615819	45839304	5045	-	36.55	p21	protein_coding	SRBD1	S1 RNA binding domain 1 [Source:HGNC Symbol;Acc:25521]
1022	ENSG00000068793	5253.96	0.469928	0.136228	3.44956	0.000561501	0.0073675	chr15	22892005	23006016	10435	+	48.83	q11.2	protein_coding	CYFIP1	cytoplasmic FMR1 interacting protein 1 [Source:HGNC Symbol;Acc:13759]
1023	ENSG00000068796	1552.09	0.229909	0.135269	1.69965	0.0891972	0.259345	chr5	61601989	61833076	4774	+	38.86	q12.1	protein_coding	KIF2A	kinesin heavy chain member 2A [Source:HGNC Symbol;Acc:6318]
1024	ENSG00000068831	874.402	-0.592058	0.290354	-2.03909	0.0414408	0.15734	chr11	64494383	64512928	6084	-	55.63	q13.1	protein_coding	RASGRP2	RAS guanyl releasing protein 2 (calcium and DAG-regulated) [Source:HGNC Symbol;Acc:9879]
1025	ENSG00000068878	18690.8	-0.131445	0.150964	-0.870704	0.383916	0.628242	chr2	54091204	54197977	10259	-	37.98	p16.2	protein_coding	PSME4	proteasome (prosome, macropain) activator subunit 4 [Source:HGNC Symbol;Acc:20635]
1026	ENSG00000068885	1199.13	0.146946	0.134458	1.09288	0.274447	0.519304	chr3	159974774	160117668	7175	-	36.52	q25.33	protein_coding	IFT80	intraflagellar transport 80 homolog (Chlamydomonas) [Source:HGNC Symbol;Acc:29262]
1027	ENSG00000068903	14850.8	-0.23299	0.206397	-1.12884	0.258964	0.501898	chr19	39369197	39390502	6204	-	53.54	q13.2	protein_coding	SIRT2	sirtuin 2 [Source:HGNC Symbol;Acc:10886]
1028	ENSG00000068912	2767.73	-0.0292561	0.106346	-0.275102	0.783238	0.900328	chr2	54014181	54045956	2592	+	38.1	p16.2	protein_coding	ERLEC1	endoplasmic reticulum lectin 1 [Source:HGNC Symbol;Acc:25222]
1029	ENSG00000068971	1458.97	-0.191594	0.103987	-1.84247	0.0654061	0.212247	chr11	64685025	64701945	3376	+	54.42	q13.1	protein_coding	PPP2R5B	protein phosphatase 2, regulatory subunit B', beta [Source:HGNC Symbol;Acc:9310]
1030	ENSG00000068976	410817	-1.11097	0.410943	-2.70346	0.00686224	0.0449263	chr11	64513861	64527769	4981	-	56.99	q13.1	protein_coding	PYGM	phosphorylase, glycogen, muscle [Source:HGNC Symbol;Acc:9726]
1031	ENSG00000069011	1786.2	-0.430696	0.349677	-1.2317	0.218062	0.453717	chr5	134363425	134370503	3511	-	59.4	q31.1	protein_coding	PITX1	paired-like homeodomain 1 [Source:HGNC Symbol;Acc:9004]
1032	ENSG00000069018	12.3957	-0.0359557	0.504889	-0.0712149	0.943227	0.975744	chr5	135548999	135732730	3608	-	41.83	q31.1	protein_coding	TRPC7	transient receptor potential cation channel, subfamily C, member 7 [Source:HGNC Symbol;Acc:20754]
1033	ENSG00000069020	4537.81	0.587271	0.251118	2.33862	0.0193549	0.0932197	chr5	65892176	66465423	14697	+	39.2	q12.3	protein_coding	MAST4	microtubule associated serine/threonine kinase family member 4 [Source:HGNC Symbol;Acc:19037]
1034	ENSG00000069122	5689.33	-0.314765	0.174829	-1.80041	0.0717955	0.225731	chr6	46820249	46922680	6717	-	41.65	p12.3	protein_coding	GPR116	G protein-coupled receptor 116 [Source:HGNC Symbol;Acc:19030]
1035	ENSG00000069188	111.12	1.19411	0.500923	2.38383	0.0171336	0.0858541	chr17	71330523	71640228	11607	-	52.3	q25.1	protein_coding	SDK2	sidekick cell adhesion molecule 2 [Source:HGNC Symbol;Acc:19308]
1036	ENSG00000069206	8.81709	-2.09836	1.03389	-2.02958	0.0423988	0.15968	chr8	24298443	24384483	4483	+	36.76	p21.2	protein_coding	ADAM7	ADAM metallopeptidase domain 7 [Source:HGNC Symbol;Acc:214]
1037	ENSG00000069248	4610.1	-0.0037237	0.0655894	-0.0567729	0.954726	0.980367	chr1	229577045	229644103	5057	-	40.19	q42.13	protein_coding	NUP133	nucleoporin 133kDa [Source:HGNC Symbol;Acc:18016]
1038	ENSG00000069275	29751.8	-0.0540728	0.173416	-0.31181	0.755185	0.884619	chr1	205681947	205719404	6546	-	39.57	q32.1	protein_coding	NUCKS1	nuclear casein kinase and cyclin-dependent kinase substrate 1 [Source:HGNC Symbol;Acc:29923]
1039	ENSG00000069329	5499.31	-0.11293	0.101742	-1.10997	0.267012	0.51061	chr16	46690054	46723430	9723	-	38.85	q11.2	protein_coding	VPS35	vacuolar protein sorting 35 homolog (S. cerevisiae) [Source:HGNC Symbol;Acc:13487]
1040	ENSG00000069345	7294.38	-0.276055	0.116064	-2.37847	0.0173844	0.0868087	chr16	46989299	47007699	5039	-	42.74	q12.1	protein_coding	DNAJA2	DnaJ (Hsp40) homolog, subfamily A, member 2 [Source:HGNC Symbol;Acc:14884]
1041	ENSG00000069399	253.829	0.0271402	0.239007	0.113554	0.909591	0.961157	chr19	45250962	45263301	3242	+	58.73	q13.32	protein_coding	BCL3	B-cell CLL/lymphoma 3 [Source:HGNC Symbol;Acc:998]	MI0025921	hsa-mir-8085
1042	ENSG00000069424	350.001	-0.00865973	0.254987	-0.0339614	0.972908	0.987844	chr1	6051526	6161253	9253	+	56.05	p36.31	protein_coding	KCNAB2	potassium voltage-gated channel, shaker-related subfamily, beta member 2 [Source:HGNC Symbol;Acc:6229]
1043	ENSG00000069431	21491.5	-0.211702	0.1652	-1.28149	0.200023	0.430898	chr12	21950335	22094336	11421	-	35.98	p12.1	protein_coding	ABCC9	ATP-binding cassette, sub-family C (CFTR/MRP), member 9 [Source:HGNC Symbol;Acc:60]
1044	ENSG00000069493	625.035	0.0242417	0.213559	0.113513	0.909624	0.961157	chr12	9817565	9848413	3219	+	37.54	p13.31	protein_coding	CLEC2D	C-type lectin domain family 2, member D [Source:HGNC Symbol;Acc:14351]
1045	ENSG00000069509	403.642	-0.199967	0.164915	-1.21254	0.225304	0.462294	chrX	44382885	44402247	1399	-	41.18	p11.3	protein_coding	FUNDC1	FUN14 domain containing 1 [Source:HGNC Symbol;Acc:28746]
1046	ENSG00000069535	4525.35	-1.24408	0.32469	-3.83158	0.000127321	0.00238705	chrX	43625858	43741693	3050	-	39.31	p11.3	protein_coding	MAOB	monoamine oxidase B [Source:HGNC Symbol;Acc:6834]
1047	ENSG00000069667	18615.5	0.0354565	0.139098	0.254903	0.798798	0.908756	chr15	60780483	61521518	17033	-	41.64	q22.2	protein_coding	RORA	RAR-related orphan receptor A [Source:HGNC Symbol;Acc:10258]
1048	ENSG00000069696	74.0702	0.257679	0.290696	0.886421	0.375391	0.621086	chr11	637293	640706	1477	+	67.02	p15.5	protein_coding	DRD4	dopamine receptor D4 [Source:HGNC Symbol;Acc:3025]
1049	ENSG00000069702	3535.39	-0.162635	0.187057	-0.869437	0.384608	0.628889	chr1	92145902	92371892	8654	-	42.29	p22.1	protein_coding	TGFBR3	transforming growth factor, beta receptor III [Source:HGNC Symbol;Acc:11774]
1050	ENSG00000069712	567.096	0.0568468	0.213886	0.265781	0.790408	0.904194	chr1	92632542	92650280	4623	+	34.59	p22.1	protein_coding	KIAA1107	KIAA1107 [Source:HGNC Symbol;Acc:29192]
1051	ENSG00000069764	57.7582	0.270574	0.34042	0.794826	0.426715	0.665959	chr16	14766405	14788526	1113	-	47.91	p13.12	protein_coding	PLA2G10	phospholipase A2, group X [Source:HGNC Symbol;Acc:9029]
1052	ENSG00000069812	4.28956	-1.06922	0.773619	-1.38211	0.166938	0.38628	chr1	6472478	6484730	5407	-	57.51	p36.31	protein_coding	HES2	hes family bHLH transcription factor 2 [Source:HGNC Symbol;Acc:16005]
1053	ENSG00000069849	1076.56	0.32113	0.119972	2.6767	0.00743506	0.0475807	chr3	141594966	141645356	2584	+	40.61	q23	protein_coding	ATP1B3	ATPase, Na+/K+ transporting, beta 3 polypeptide [Source:HGNC Symbol;Acc:806]
1054	ENSG00000069869	15648	-0.83402	0.238732	-3.49353	0.000476674	0.00648875	chr15	56119120	56285944	9097	-	38.51	q21.3	protein_coding	NEDD4	neural precursor cell expressed, developmentally down-regulated 4, E3 ubiquitin protein ligase [Source:HGNC Symbol;Acc:7727]
1055	ENSG00000069943	1734.56	0.318507	0.186493	1.70787	0.08766	0.256534	chr15	55611158	55647846	4539	+	39.99	q21.3	protein_coding	PIGB	phosphatidylinositol glycan anchor biosynthesis, class B [Source:HGNC Symbol;Acc:8959]
1056	ENSG00000069956	6084.89	-0.591714	0.244192	-2.42315	0.0153864	0.0797886	chr15	52244303	52358462	5281	+	43.19	q21.2	protein_coding	MAPK6	mitogen-activated protein kinase 6 [Source:HGNC Symbol;Acc:6879]
1057	ENSG00000069966	252.951	0.304961	0.189422	1.60996	0.107407	0.291776	chr15	52413117	52483566	7487	-	45.18	q21.2	protein_coding	GNB5	guanine nucleotide binding protein (G protein), beta 5 [Source:HGNC Symbol;Acc:4401]
1058	ENSG00000069974	367.804	0.112995	0.153047	0.738303	0.46033	0.692613	chr15	55495164	55611311	5603	-	41.6	q21.3	protein_coding	RAB27A	RAB27A, member RAS oncogene family [Source:HGNC Symbol;Acc:9766]
1059	ENSG00000069998	2030.28	-0.374576	0.172366	-2.17314	0.0297694	0.125064	chr22	17618401	17646177	4936	-	50.12	q11.1	protein_coding	CECR5	cat eye syndrome chromosome region, candidate 5 [Source:HGNC Symbol;Acc:1843]
1060	ENSG00000070010	2948.32	-0.532303	0.106233	-5.0107	5.42e-07	3.11e-05	chr22	19437433	19466738	8736	-	46.94	q11.21	protein_coding	UFD1L	ubiquitin fusion degradation 1 like (yeast) [Source:HGNC Symbol;Acc:12520]
1061	ENSG00000070018	9655.44	-0.2069	0.21277	-0.972413	0.330845	0.579137	chr12	12268959	12419946	10337	-	38.54	p13.2	protein_coding	LRP6	low density lipoprotein receptor-related protein 6 [Source:HGNC Symbol;Acc:6698]
1062	ENSG00000070019	497.776	0.0926434	0.227883	0.406539	0.684346	0.844686	chr12	14765576	14849519	4167	-	39.57	p12.3	protein_coding	GUCY2C	guanylate cyclase 2C (heat stable enterotoxin receptor) [Source:HGNC Symbol;Acc:4688]
1063	ENSG00000070031	401.372	2.95249	0.350515	8.42328	3.66e-17	2.31e-14	chr11	626431	627143	366	-	73.35	p15.5	protein_coding	SCT	secretin [Source:HGNC Symbol;Acc:10607]
1064	ENSG00000070047	4925.68	-0.300949	0.124834	-2.4108	0.0159178	0.0816702	chr11	576486	612222	5769	+	56.31	p15.5	protein_coding	PHRF1	PHD and ring finger domains 1 [Source:HGNC Symbol;Acc:24351]
1065	ENSG00000070061	3995.94	-0.0673103	0.155394	-0.433158	0.6649	0.832554	chr9	111629797	111696396	6048	-	39.91	q31.3	protein_coding	IKBKAP	inhibitor of kappa light polypeptide gene enhancer in B-cells, kinase complex-associated protein [Source:HGNC Symbol;Acc:5959]
1066	ENSG00000070081	2369.75	0.0648644	0.151424	0.428363	0.668387	0.834886	chr11	17229700	17371521	8993	+	41.44	p15.1	protein_coding	NUCB2	nucleobindin 2 [Source:HGNC Symbol;Acc:8044]
1067	ENSG00000070087	17600.7	0.557943	0.154448	3.61248	0.000303277	0.00460587	chr3	149682691	149768575	3440	-	39.59	q25.1	protein_coding	PFN2	profilin 2 [Source:HGNC Symbol;Acc:8882]
1068	ENSG00000070159	6979.33	-0.986922	0.277117	-3.56138	0.000368904	0.00533887	chr9	112137746	112260590	10071	-	45.34	q31.3	protein_coding	PTPN3	protein tyrosine phosphatase, non-receptor type 3 [Source:HGNC Symbol;Acc:9655]
1069	ENSG00000070182	75570.1	-0.444022	0.20892	-2.12533	0.0335594	0.135724	chr14	65213002	65346601	14771	-	48.21	q23.3	protein_coding	SPTB	spectrin, beta, erythrocytic [Source:HGNC Symbol;Acc:11274]
1070	ENSG00000070190	194.09	-0.0861037	0.308096	-0.279471	0.779884	0.89842	chr4	100737990	100791311	4548	+	38.71	q23	protein_coding	DAPP1	dual adaptor of phosphotyrosine and 3-phosphoinositides [Source:HGNC Symbol;Acc:16500]
1071	ENSG00000070193	155.68	-0.865075	0.480344	-1.80095	0.0717109	0.225526	chr5	44303646	44389808	3011	-	35.67	p12	protein_coding	FGF10	fibroblast growth factor 10 [Source:HGNC Symbol;Acc:3666]
1072	ENSG00000070214	3140.29	0.295036	0.111972	2.6349	0.00841617	0.0519199	chr9	108006903	108201452	12613	+	38.86	q31.1	protein_coding	SLC44A1	solute carrier family 44 (choline transporter), member 1 [Source:HGNC Symbol;Acc:18798]
1073	ENSG00000070269	1072.46	-0.030981	0.164371	-0.188482	0.850498	0.934528	chr14	56955072	57117324	8077	+	39.13	q22.3	protein_coding	TMEM260	transmembrane protein 260 [Source:HGNC Symbol;Acc:20185]
1074	ENSG00000070366	4682.58	0.191511	0.122277	1.56621	0.1173	0.308632	chr17	1963133	2207065	11060	-	45.75	p13.3	protein_coding	SMG6	SMG6 nonsense mediated mRNA decay factor [Source:HGNC Symbol;Acc:17809]
1075	ENSG00000070367	4765.01	-0.0268739	0.101436	-0.264934	0.79106	0.904521	chr14	57670518	57735726	9269	-	36	q22.3	protein_coding	EXOC5	exocyst complex component 5 [Source:HGNC Symbol;Acc:10696]
1076	ENSG00000070371	21357.7	-1.11458	0.349321	-3.1907	0.00141929	0.0143275	chr22	19166986	19279239	9843	-	46.42	q11.21	protein_coding	CLTCL1	clathrin, heavy chain-like 1 [Source:HGNC Symbol;Acc:2093]
1077	ENSG00000070388	10.9285	-0.493764	0.505985	-0.975847	0.32914	0.577312	chr19	639879	643703	2110	+	68.05	p13.3	protein_coding	FGF22	fibroblast growth factor 22 [Source:HGNC Symbol;Acc:3679]
1078	ENSG00000070404	371.611	0.0978698	0.263923	0.370828	0.710766	0.861153	chr19	676392	683385	3144	+	64.96	p13.3	protein_coding	FSTL3	follistatin-like 3 (secreted glycoprotein) [Source:HGNC Symbol;Acc:3973]
1079	ENSG00000070413	4292.36	-0.0748501	0.119918	-0.624176	0.532512	0.747074	chr22	19023795	19109967	5596	-	48.63	q11.21	protein_coding	DGCR2	DiGeorge syndrome critical region gene 2 [Source:HGNC Symbol;Acc:2845]
1080	ENSG00000070423	1147.23	-0.704358	0.24363	-2.8911	0.00383899	0.0295569	chr19	647526	663277	3677	-	63.55	p13.3	protein_coding	RNF126	ring finger protein 126 [Source:HGNC Symbol;Acc:21151]
1081	ENSG00000070444	879.031	-0.276691	0.227103	-1.21835	0.223091	0.459673	chr17	2287354	2304412	8728	-	61.67	p13.3	protein_coding	MNT	MAX network transcriptional repressor [Source:HGNC Symbol;Acc:7188]
1082	ENSG00000070476	5227.61	-0.277498	0.113999	-2.43422	0.0149241	0.0781521	chr3	126156444	126194762	7357	-	48.68	q21.3	protein_coding	ZXDC	ZXD family zinc finger C [Source:HGNC Symbol;Acc:28160]
1083	ENSG00000070495	2684.36	-0.776712	0.185482	-4.18754	2.82e-05	0.000742174	chr17	74708919	74722866	5949	-	48.79	q25.1	protein_coding	JMJD6	jumonji domain containing 6 [Source:HGNC Symbol;Acc:19355]
1084	ENSG00000070501	3161.77	-0.363034	0.258541	-1.40416	0.16027	0.37658	chr8	42195972	42229326	4106	+	40.44	p11.21	protein_coding	POLB	polymerase (DNA directed), beta [Source:HGNC Symbol;Acc:9174]
1085	ENSG00000070526	122.478	-0.0180471	0.255253	-0.0707029	0.943634	0.975899	chr17	74620843	74639920	3448	-	48.62	q25.1	protein_coding	ST6GALNAC1	ST6 (alpha-N-acetyl-neuraminyl-2,3-beta-galactosyl-1,3)-N-acetylgalactosaminide alpha-2,6-sialyltransferase 1 [Source:HGNC Symbol;Acc:23614]
1086	ENSG00000070540	5329.17	-0.363317	0.196415	-1.84974	0.0643515	0.209809	chr17	66417089	66453654	3402	-	46.58	q24.2	protein_coding	WIPI1	WD repeat domain, phosphoinositide interacting 1 [Source:HGNC Symbol;Acc:25471]
1087	ENSG00000070601	502.911	0.231435	0.351153	0.65907	0.509851	0.730289	chr9	37650997	37746901	6724	+	44.15	p13.2	protein_coding	FRMPD1	FERM and PDZ domain containing 1 [Source:HGNC Symbol;Acc:29159]
1088	ENSG00000070610	6392.21	-0.287012	0.143221	-2.00398	0.0450718	0.166454	chr9	35736863	35749983	5079	-	51.55	p13.3	protein_coding	GBA2	glucosidase, beta (bile acid) 2 [Source:HGNC Symbol;Acc:18986]
1089	ENSG00000070614	5673.26	-0.183661	0.126556	-1.45123	0.146717	0.356401	chr5	149865381	149937773	9043	+	52.04	q33.1	protein_coding	NDST1	N-deacetylase/N-sulfotransferase (heparan glucosaminyl) 1 [Source:HGNC Symbol;Acc:7680]
1090	ENSG00000070669	673.976	-1.7631	0.742059	-2.37596	0.0175033	0.087124	chr7	97481430	97501854	4455	-	38.42	q21.3	protein_coding	ASNS	asparagine synthetase (glutamine-hydrolyzing) [Source:HGNC Symbol;Acc:753]
1091	ENSG00000070718	1293.48	0.106435	0.164347	0.647625	0.517227	0.735467	chr8	42010464	42029191	6276	+	41.4	p11.21	protein_coding	AP3M2	adaptor-related protein complex 3, mu 2 subunit [Source:HGNC Symbol;Acc:570]
1092	ENSG00000070731	9217.99	-0.301509	0.253663	-1.18862	0.234589	0.473362	chr17	74559792	74583038	7558	-	53.34	q25.1	protein_coding	ST6GALNAC2	ST6 (alpha-N-acetyl-neuraminyl-2,3-beta-galactosyl-1,3)-N-acetylgalactosaminide alpha-2,6-sialyltransferase 2 [Source:HGNC Symbol;Acc:10867]
1093	ENSG00000070756	4584.02	0.198756	0.170661	1.16463	0.24417	0.485184	chr8	101698044	101735037	4752	-	40.75	q22.3	protein_coding	PABPC1	poly(A) binding protein, cytoplasmic 1 [Source:HGNC Symbol;Acc:8554]	MI0025241	hsa-mir-7705
1094	ENSG00000070759	857.145	-0.724234	0.253259	-2.85965	0.00424105	0.0317686	chr1	45809555	45956872	3460	-	42.23	p34.1	protein_coding	TESK2	testis-specific kinase 2 [Source:HGNC Symbol;Acc:11732]
1095	ENSG00000070761	630.508	0.357576	0.113491	3.15069	0.00162885	0.0158172	chr16	58147496	58163354	2371	-	44.93	q21	protein_coding	C16orf80	chromosome 16 open reading frame 80 [Source:HGNC Symbol;Acc:29523]
1096	ENSG00000070770	1834.14	0.095408	0.1939	0.492049	0.622685	0.805997	chr16	58191811	58231824	6905	-	41.31	q21	protein_coding	CSNK2A2	casein kinase 2, alpha prime polypeptide [Source:HGNC Symbol;Acc:2459]
1097	ENSG00000070778	3330.88	0.400318	0.107487	3.72435	0.00019582	0.00331073	chr14	88932122	89021077	7396	-	41.28	q31.3	protein_coding	PTPN21	protein tyrosine phosphatase, non-receptor type 21 [Source:HGNC Symbol;Acc:9651]
1098	ENSG00000070785	4222.68	-0.517375	0.128056	-4.04022	5.34e-05	0.00121909	chr1	45316450	45452282	3043	-	42.52	p34.1	protein_coding	EIF2B3	eukaryotic translation initiation factor 2B, subunit 3 gamma, 58kDa [Source:HGNC Symbol;Acc:3259]
1099	ENSG00000070808	15139.1	-0.648146	0.2109	-3.07324	0.00211749	0.0191013	chr5	149599054	149669854	6150	-	52.11	q32	protein_coding	CAMK2A	calcium/calmodulin-dependent protein kinase II alpha [Source:HGNC Symbol;Acc:1460]
1100	ENSG00000070814	2108.55	-0.103626	0.119438	-0.867608	0.385609	0.629867	chr5	149737202	149779871	11278	+	52.45	q32	protein_coding	TCOF1	Treacher Collins-Franceschetti syndrome 1 [Source:HGNC Symbol;Acc:11654]
1101	ENSG00000070831	9025.44	0.192958	0.104592	1.84486	0.0650583	0.211381	chr1	22379120	22419437	3470	+	41.82	p36.12	protein_coding	CDC42	cell division cycle 42 [Source:HGNC Symbol;Acc:1736]
1102	ENSG00000070882	1326.46	0.488783	0.395879	1.23468	0.21695	0.45249	chr7	24836158	25021253	8100	-	40.72	p15.3	protein_coding	OSBPL3	oxysterol binding protein-like 3 [Source:HGNC Symbol;Acc:16370]
1103	ENSG00000070886	7.00147	1.75073	0.841621	2.08018	0.0375087	0.146731	chr1	22890057	22930087	5358	+	56.79	p36.12	protein_coding	EPHA8	EPH receptor A8 [Source:HGNC Symbol;Acc:3391]
1104	ENSG00000070915	4.33175	1.8172	0.774238	2.34709	0.0189209	0.0918546	chr16	56899119	56949762	6180	+	52.83	q13	protein_coding	SLC12A3	solute carrier family 12 (sodium/chloride transporter), member 3 [Source:HGNC Symbol;Acc:10912]
1105	ENSG00000070950	487.753	0.231675	0.147063	1.57534	0.115177	0.304807	chr3	8817088	9005457	6983	-	40.44	p25.3	protein_coding	RAD18	RAD18 homolog (S. cerevisiae) [Source:HGNC Symbol;Acc:18278]
1106	ENSG00000070961	6703.25	0.0690074	0.144316	0.47817	0.632529	0.811786	chr12	89981828	90103077	9491	-	36.37	q21.33	protein_coding	ATP2B1	ATPase, Ca++ transporting, plasma membrane 1 [Source:HGNC Symbol;Acc:814]
1107	ENSG00000070985	29.3115	0.104461	0.333773	0.312971	0.754303	0.884128	chr11	2425745	2444275	3962	-	63.7	p15.5	protein_coding	TRPM5	transient receptor potential cation channel, subfamily M, member 5 [Source:HGNC Symbol;Acc:14323]
1108	ENSG00000071051	2609.41	-0.513092	0.246064	-2.0852	0.0370512	0.145495	chr2	106361354	106510730	2990	+	44.54	q12.2	protein_coding	NCK2	NCK adaptor protein 2 [Source:HGNC Symbol;Acc:7665]
1109	ENSG00000071054	7190.24	0.593457	0.159939	3.71053	0.000206824	0.00345813	chr2	102313312	102511149	11918	+	41.04	q11.2	protein_coding	MAP4K4	mitogen-activated protein kinase kinase kinase kinase 4 [Source:HGNC Symbol;Acc:6866]
1110	ENSG00000071073	1680.14	-0.0302579	0.102617	-0.294862	0.768099	0.892322	chr2	99235569	99347589	9630	-	40.01	q11.2	protein_coding	MGAT4A	mannosyl (alpha-1,3-)-glycoprotein beta-1,4-N-acetylglucosaminyltransferase, isozyme A [Source:HGNC Symbol;Acc:7047]
1111	ENSG00000071082	19300.9	0.0561221	0.12308	0.455982	0.648403	0.822402	chr2	101618177	101640494	5791	+	42.84	q11.2	protein_coding	RPL31	ribosomal protein L31 [Source:HGNC Symbol;Acc:10334]
1112	ENSG00000071127	8265.54	-0.182013	0.149369	-1.21855	0.223015	0.459596	chr4	10075963	10118573	7827	-	54.98	p16.1	protein_coding	WDR1	WD repeat domain 1 [Source:HGNC Symbol;Acc:12754]
1113	ENSG00000071189	9508.04	-0.205227	0.116901	-1.75557	0.0791619	0.240284	chr7	17830385	17980124	16417	-	35.09	p21.1	protein_coding	SNX13	sorting nexin 13 [Source:HGNC Symbol;Acc:21335]
1114	ENSG00000071205	6642.41	-0.246413	0.194626	-1.26609	0.205481	0.438122	chr4	148653214	148993931	10759	+	40.94	q31.23	protein_coding	ARHGAP10	Rho GTPase activating protein 10 [Source:HGNC Symbol;Acc:26099]
1115	ENSG00000071242	3616.92	-0.422261	0.133166	-3.17094	0.00151947	0.0150392	chr6	166822852	167319939	8243	-	46.48	q27	protein_coding	RPS6KA2	ribosomal protein S6 kinase, 90kDa, polypeptide 2 [Source:HGNC Symbol;Acc:10431]
1116	ENSG00000071243	1010.31	0.0780421	0.123419	0.632335	0.527168	0.743404	chr7	120590803	120617270	5214	+	35.55	q31.31	protein_coding	ING3	inhibitor of growth family, member 3 [Source:HGNC Symbol;Acc:14587]
1117	ENSG00000071246	1577.11	0.0834926	0.212687	0.39256	0.694644	0.850991	chr14	77228532	77249354	6498	+	54.83	q24.3	protein_coding	VASH1	vasohibin 1 [Source:HGNC Symbol;Acc:19964]
1118	ENSG00000071282	12332.9	-1.00973	0.405338	-2.49107	0.0127358	0.069862	chr3	8543393	8609805	2578	+	44.05	p26.1	protein_coding	LMCD1	LIM and cysteine-rich domains 1 [Source:HGNC Symbol;Acc:6633]
1119	ENSG00000071462	2213.97	-0.151137	0.120619	-1.25301	0.210202	0.444042	chr7	73097355	73119491	7944	+	54.07	q11.23	protein_coding	WBSCR22	Williams Beuren syndrome chromosome region 22 [Source:HGNC Symbol;Acc:16405]
1120	ENSG00000071537	8450.79	-0.203762	0.129296	-1.57593	0.115042	0.304612	chr14	81937893	82000205	9559	-	38.48	q31.1	protein_coding	SEL1L	sel-1 suppressor of lin-12-like (C. elegans) [Source:HGNC Symbol;Acc:10717]
1121	ENSG00000071539	74.2332	0.240716	0.276759	0.869767	0.384428	0.628697	chr5	892758	919472	3560	+	50.49	p15.33	protein_coding	TRIP13	thyroid hormone receptor interactor 13 [Source:HGNC Symbol;Acc:12307]
1122	ENSG00000071553	2476.67	-0.101625	0.0678066	-1.49874	0.133941	0.33586	chrX	153656978	153664862	4884	+	56.77	q28	protein_coding	ATP6AP1	ATPase, H+ transporting, lysosomal accessory protein 1 [Source:HGNC Symbol;Acc:868]
1123	ENSG00000071564	1084.12	-0.0371311	0.135207	-0.274624	0.783605	0.900508	chr19	1609291	1652604	6061	-	59.57	p13.3	protein_coding	TCF3	transcription factor 3 [Source:HGNC Symbol;Acc:11633]
1124	ENSG00000071575	1300.2	-0.0213902	0.171911	-0.124426	0.900978	0.957427	chr2	12857015	12882860	4588	+	47.68	p24.3	protein_coding	TRIB2	tribbles pseudokinase 2 [Source:HGNC Symbol;Acc:30809]
1125	ENSG00000071626	3854.21	0.00154292	0.167116	0.00923265	0.992634	0.996511	chr19	1407568	1435719	9272	+	58.73	p13.3	protein_coding	DAZAP1	DAZ associated protein 1 [Source:HGNC Symbol;Acc:2683]
1126	ENSG00000071655	6002.19	0.036992	0.113445	0.32608	0.744364	0.879671	chr19	1576639	1592882	5173	-	58.18	p13.3	protein_coding	MBD3	methyl-CpG binding domain protein 3 [Source:HGNC Symbol;Acc:6918]
1127	ENSG00000071794	3294.33	-0.159635	0.196477	-0.812487	0.416512	0.657069	chr3	148747914	148804341	6024	-	35.95	q24	protein_coding	HLTF	helicase-like transcription factor [Source:HGNC Symbol;Acc:11099]
1128	ENSG00000071859	1242.05	-0.340464	0.191228	-1.78041	0.0750094	0.231986	chrX	153672473	153679002	2567	+	60.49	q28	protein_coding	FAM50A	family with sequence similarity 50, member A [Source:HGNC Symbol;Acc:18786]
1129	ENSG00000071889	1497.99	-0.185734	0.113155	-1.64141	0.100713	0.280518	chrX	153733350	153744566	6240	-	55.15	q28	protein_coding	FAM3A	family with sequence similarity 3, member A [Source:HGNC Symbol;Acc:13749]
1130	ENSG00000071894	2455.55	-0.00789967	0.1773	-0.0445554	0.964462	0.98413	chr8	145618444	145634753	6096	-	60.12	q24.3	protein_coding	CPSF1	cleavage and polyadenylation specific factor 1, 160kDa [Source:HGNC Symbol;Acc:2324]	MI0022695	hsa-mir-6849
1131	ENSG00000071909	51.5783	-0.246332	0.416635	-0.591242	0.554358	0.762558	chr2	171034655	171511681	8236	+	40.21	q31.1	protein_coding	MYO3B	myosin IIIB [Source:HGNC Symbol;Acc:15576]
1132	ENSG00000071967	6340.97	0.434744	0.222185	1.95668	0.0503856	0.179341	chr2	172378757	172414643	5176	+	41.28	q31.1	protein_coding	CYBRD1	cytochrome b reductase 1 [Source:HGNC Symbol;Acc:20797]
1133	ENSG00000071991	101.441	-1.33856	0.446405	-2.99853	0.00271289	0.0230128	chr18	64168320	64271375	6864	-	32.3	q22.1	protein_coding	CDH19	cadherin 19, type 2 [Source:HGNC Symbol;Acc:1758]
1134	ENSG00000071994	2381.32	0.0732459	0.112749	0.649637	0.515927	0.734525	chr6	170884383	170893780	6476	-	41.64	q27	protein_coding	PDCD2	programmed cell death 2 [Source:HGNC Symbol;Acc:8762]
1135	ENSG00000072041	8.13884	-0.729897	0.808594	-0.902675	0.366699	0.612827	chr12	85253492	85307394	8556	-	34.55	q21.31	protein_coding	SLC6A15	solute carrier family 6 (neutral amino acid transporter), member 15 [Source:HGNC Symbol;Acc:13621]
1136	ENSG00000072042	1008.38	0.0400097	0.0888713	0.450198	0.652568	0.824836	chr14	68143518	68162531	5518	-	42.66	q24.1	protein_coding	RDH11	retinol dehydrogenase 11 (all-trans/9-cis/11-cis) [Source:HGNC Symbol;Acc:17964]
1137	ENSG00000072062	6508.14	-0.429235	0.231757	-1.85209	0.0640129	0.209103	chr19	14202500	14228896	6144	-	53.35	p13.12	protein_coding	PRKACA	protein kinase, cAMP-dependent, catalytic, alpha [Source:HGNC Symbol;Acc:9380]
1138	ENSG00000072071	528.708	0.120658	0.149462	0.807277	0.419507	0.659372	chr19	14260750	14316999	6292	-	56.38	p13.12	protein_coding	LPHN1	latrophilin 1 [Source:HGNC Symbol;Acc:20973]
1139	ENSG00000072110	1617.3	0.251176	0.164451	1.52736	0.12667	0.324067	chr14	69340860	69446157	10626	-	50.81	q24.1	protein_coding	ACTN1	actinin, alpha 1 [Source:HGNC Symbol;Acc:163]
1140	ENSG00000072121	5620.37	-0.168942	0.0727982	-2.32069	0.0203037	0.096332	chr14	68194091	68283307	15706	-	43	q24.1	protein_coding	ZFYVE26	zinc finger, FYVE domain containing 26 [Source:HGNC Symbol;Acc:20761]
1141	ENSG00000072133	196.883	2.17961	0.408559	5.33486	9.56e-08	7.3e-06	chrX	83318984	83442933	2890	-	35.29	q21.1	protein_coding	RPS6KA6	ribosomal protein S6 kinase, 90kDa, polypeptide 6 [Source:HGNC Symbol;Acc:10435]
1142	ENSG00000072134	2725.64	-0.245913	0.120281	-2.04448	0.0409061	0.155985	chr17	19118928	19240028	9844	+	48.72	p11.2	protein_coding	EPN2	epsin 2 [Source:HGNC Symbol;Acc:18639]
1143	ENSG00000072135	970.926	0.126509	0.115522	1.09511	0.273468	0.518011	chr2	131113580	131132982	5774	+	47.65	q21.1	protein_coding	PTPN18	protein tyrosine phosphatase, non-receptor type 18 (brain-derived) [Source:HGNC Symbol;Acc:9649]
1144	ENSG00000072163	2198.43	-0.477845	0.216886	-2.2032	0.0275804	0.118666	chr2	128395956	128439360	8487	-	56.36	q14.3	protein_coding	LIMS2	LIM and senescent cell antigen-like domains 2 [Source:HGNC Symbol;Acc:16084]
1145	ENSG00000072182	23.1172	0.286249	0.445838	0.642047	0.520843	0.738269	chr2	220378892	220403494	5250	+	56.96	q35	protein_coding	ASIC4	acid-sensing (proton-gated) ion channel family member 4 [Source:HGNC Symbol;Acc:21263]
1146	ENSG00000072195	56878.7	-1.15518	0.241821	-4.77701	1.78e-06	8.09e-05	chr2	220299568	220363009	17910	+	57.68	q35	protein_coding	SPEG	SPEG complex locus [Source:HGNC Symbol;Acc:16901]
1147	ENSG00000072201	1081.62	0.00283305	0.133426	0.0212331	0.98306	0.992028	chr4	54325468	54567572	5725	-	41.42	q12	protein_coding	LNX1	ligand of numb-protein X 1, E3 ubiquitin protein ligase [Source:HGNC Symbol;Acc:6657]
1148	ENSG00000072210	9350.16	0.714449	0.169273	4.2207	2.44e-05	0.000662306	chr17	19551449	19580911	6457	+	44.22	p11.2	protein_coding	ALDH3A2	aldehyde dehydrogenase 3 family, member A2 [Source:HGNC Symbol;Acc:403]
1149	ENSG00000072274	15780.4	-0.550013	0.490802	-1.12064	0.262441	0.505682	chr3	195754054	195809060	7887	-	42.47	q29	protein_coding	TFRC	transferrin receptor [Source:HGNC Symbol;Acc:11763]
1150	ENSG00000072310	4884.94	0.0269227	0.196402	0.137079	0.890968	0.953514	chr17	17713713	17740325	8039	-	58.04	p11.2	protein_coding	SREBF1	sterol regulatory element binding transcription factor 1 [Source:HGNC Symbol;Acc:11289]
1151	ENSG00000072315	40.0167	0.173396	0.267238	0.648846	0.516438	0.734868	chrX	111017543	111326004	5839	-	40.24	q23	protein_coding	TRPC5	transient receptor potential cation channel, subfamily C, member 5 [Source:HGNC Symbol;Acc:12337]
1152	ENSG00000072364	13628.5	0.546562	0.144521	3.78188	0.000155649	0.00278737	chr5	132211071	132299326	11297	-	40.42	q31.1	protein_coding	AFF4	AF4/FMR2 family, member 4 [Source:HGNC Symbol;Acc:17869]
1153	ENSG00000072401	6887.92	-1.06294	0.272188	-3.90517	9.42e-05	0.00189256	chr10	60094735	60130513	3486	+	36.05	q21.1	protein_coding	UBE2D1	ubiquitin-conjugating enzyme E2D 1 [Source:HGNC Symbol;Acc:12474]
1154	ENSG00000072415	4693.69	-0.251928	0.128681	-1.95777	0.0502571	0.179078	chr14	67707826	67802536	8743	+	37.63	q23.3	protein_coding	MPP5	membrane protein, palmitoylated 5 (MAGUK p55 subfamily member 5) [Source:HGNC Symbol;Acc:18669]
1155	ENSG00000072422	17048.1	-0.575488	0.330676	-1.74034	0.0817993	0.245452	chr10	62629196	62761198	4841	-	38.94	q21.2	protein_coding	RHOBTB1	Rho-related BTB domain containing 1 [Source:HGNC Symbol;Acc:18738]
1156	ENSG00000072444	148.529	0.40242	0.164587	2.44503	0.0144839	0.0765761	chr10	48001603	48055018	2055	-	36.61	q11.22	protein_coding	ASAH2C	N-acylsphingosine amidohydrolase (non-lysosomal ceramidase) 2C [Source:HGNC Symbol;Acc:23457]
1157	ENSG00000072501	6160.46	0.0964835	0.158219	0.609809	0.541988	0.753611	chrX	53401070	53449677	10674	-	45.52	p11.22	protein_coding	SMC1A	structural maintenance of chromosomes 1A [Source:HGNC Symbol;Acc:11111]
1158	ENSG00000072506	1674.54	-0.0801392	0.159465	-0.502549	0.615281	0.801663	chrX	53458206	53461320	1115	-	52.04	p11.22	protein_coding	HSD17B10	hydroxysteroid (17-beta) dehydrogenase 10 [Source:HGNC Symbol;Acc:4800]
1159	ENSG00000072518	1626.78	-0.441999	0.156003	-2.83327	0.00460738	0.0336373	chr11	63606400	63678491	6154	+	49.65	q13.1	protein_coding	MARK2	MAP/microtubule affinity-regulating kinase 2 [Source:HGNC Symbol;Acc:3332]
1160	ENSG00000072571	102.573	-0.361933	0.208276	-1.73776	0.0822539	0.246391	chr5	162887209	162918947	3932	+	36.98	q34	protein_coding	HMMR	hyaluronan-mediated motility receptor (RHAMM) [Source:HGNC Symbol;Acc:5012]
1161	ENSG00000072609	1463.28	0.102289	0.167686	0.610005	0.541858	0.753581	chr12	133398773	133532890	9214	-	48.69	q24.33	protein_coding	CHFR	checkpoint with forkhead and ring finger domains, E3 ubiquitin protein ligase [Source:HGNC Symbol;Acc:20455]
1162	ENSG00000072657	256.056	-1.00496	0.237541	-4.23069	2.33e-05	0.00064113	chr12	72481046	73059422	6835	+	36.2	q21.1	protein_coding	TRHDE	thyrotropin-releasing hormone degrading enzyme [Source:HGNC Symbol;Acc:30748]
1163	ENSG00000072682	1628.33	-0.11714	0.280783	-0.417189	0.67654	0.83972	chr5	131527531	131631008	8502	-	49.39	q31.1	protein_coding	P4HA2	prolyl 4-hydroxylase, alpha polypeptide II [Source:HGNC Symbol;Acc:8547]
1164	ENSG00000072694	772.904	1.10462	0.353588	3.12402	0.00178398	0.0169485	chr1	161551101	161648444	6996	+	44.75	q23.3	protein_coding	FCGR2B	Fc fragment of IgG, low affinity IIb, receptor (CD32) [Source:HGNC Symbol;Acc:3618]
1165	ENSG00000072736	7639.26	-0.717987	0.164852	-4.35535	1.33e-05	0.000412064	chr16	68118654	68263162	8806	+	41.53	q22.1	protein_coding	NFATC3	nuclear factor of activated T-cells, cytoplasmic, calcineurin-dependent 3 [Source:HGNC Symbol;Acc:7777]
1166	ENSG00000072756	2017.39	-0.0378786	0.0913239	-0.414772	0.678309	0.840596	chr3	3168600	3192563	5518	+	38.89	p26.2	protein_coding	TRNT1	tRNA nucleotidyl transferase, CCA-adding, 1 [Source:HGNC Symbol;Acc:17341]
1167	ENSG00000072778	53765.5	-0.0847493	0.174599	-0.485395	0.627396	0.808661	chr17	7120444	7128592	4865	+	58.5	p13.1	protein_coding	ACADVL	acyl-CoA dehydrogenase, very long chain [Source:HGNC Symbol;Acc:92]
1168	ENSG00000072786	1008.25	-0.2025	0.137021	-1.47787	0.139442	0.344776	chr5	171469077	171615390	9083	-	49.03	q35.1	protein_coding	STK10	serine/threonine kinase 10 [Source:HGNC Symbol;Acc:11388]
1169	ENSG00000072803	6823.15	0.0745366	0.117937	0.632005	0.527384	0.743503	chr5	171288553	171433877	5577	-	39.72	q35.1	protein_coding	FBXW11	F-box and WD repeat domain containing 11 [Source:HGNC Symbol;Acc:13607]
1170	ENSG00000072818	1758.75	0.264007	0.14906	1.77115	0.0765364	0.235293	chr17	7239848	7254797	7421	+	54.56	p13.1	protein_coding	ACAP1	ArfGAP with coiled-coil, ankyrin repeat and PH domains 1 [Source:HGNC Symbol;Acc:16467]
1171	ENSG00000072832	355.382	0.489272	0.214454	2.28148	0.0225203	0.103459	chr4	5749811	5894785	5823	-	48.98	p16.2	protein_coding	CRMP1	collapsin response mediator protein 1 [Source:HGNC Symbol;Acc:2365]
1172	ENSG00000072840	1240.75	0.478401	0.194155	2.46402	0.013739	0.0736882	chr4	5712924	5830772	7923	+	47.77	p16.2	protein_coding	EVC	Ellis van Creveld syndrome [Source:HGNC Symbol;Acc:3497]
1173	ENSG00000072849	1329.96	0.124329	0.110038	1.12987	0.258532	0.501298	chr17	5374571	5390131	6386	-	41.38	p13.2	protein_coding	DERL2	derlin 2 [Source:HGNC Symbol;Acc:17943]
1174	ENSG00000072858	282.636	0.125219	0.272819	0.458982	0.646247	0.821173	chr3	113251143	113348425	8072	+	40.79	q13.2	protein_coding	SIDT1	SID1 transmembrane family, member 1 [Source:HGNC Symbol;Acc:25967]
1175	ENSG00000072864	1396.35	-0.364976	0.203767	-1.79114	0.0732707	0.228494	chr16	15737124	15820210	8035	+	48.54	p13.11	protein_coding	NDE1	nudE neurodevelopment protein 1 [Source:HGNC Symbol;Acc:17619]	MI0002468	hsa-mir-484
1176	ENSG00000072952	1443.43	-0.0945743	0.13982	-0.676402	0.498785	0.722753	chr11	10594638	10715535	7702	-	45.65	p15.3	protein_coding	MRVI1	murine retrovirus integration site 1 homolog [Source:HGNC Symbol;Acc:7237]
1177	ENSG00000072954	32413.8	-0.925185	0.257557	-3.59216	0.000327947	0.00488161	chr19	16771938	16800840	3005	+	49.93	p13.11	protein_coding	TMEM38A	transmembrane protein 38A [Source:HGNC Symbol;Acc:28462]
1178	ENSG00000072958	1518.98	-0.127911	0.138125	-0.926055	0.354418	0.601167	chr19	16308389	16346160	3813	+	53.07	p13.11	protein_coding	AP1M1	adaptor-related protein complex 1, mu 1 subunit [Source:HGNC Symbol;Acc:13667]
1179	ENSG00000073008	3684.29	0.204152	0.237721	0.858788	0.390458	0.634086	chr19	45147098	45166850	3519	+	50.38	q13.31	protein_coding	PVR	poliovirus receptor [Source:HGNC Symbol;Acc:9705]
1180	ENSG00000073009	1053.53	-0.0506711	0.145089	-0.349241	0.726908	0.869336	chrX	153769414	153796782	7462	+	55.97	q28	protein_coding	IKBKG	inhibitor of kappa light polypeptide gene enhancer in B-cells, kinase gamma [Source:HGNC Symbol;Acc:5961]
1181	ENSG00000073050	899.959	0.0245469	0.145075	0.169201	0.865638	0.941815	chr19	44047192	44084625	3459	-	50.94	q13.31	protein_coding	XRCC1	X-ray repair complementing defective repair in Chinese hamster cells 1 [Source:HGNC Symbol;Acc:12828]
1182	ENSG00000073060	851.692	-0.123867	0.177834	-0.696532	0.486096	0.713303	chr12	125261402	125367214	8240	-	51.45	q24.31	protein_coding	SCARB1	scavenger receptor class B, member 1 [Source:HGNC Symbol;Acc:1664]
1183	ENSG00000073067	16.9407	0.187184	0.386512	0.484289	0.628181	0.809237	chr7	1022835	1029276	2773	+	66.81	p22.3	protein_coding	CYP2W1	cytochrome P450, family 2, subfamily W, polypeptide 1 [Source:HGNC Symbol;Acc:20243]
1184	ENSG00000073111	1165.54	0.0537817	0.148174	0.362963	0.716633	0.863996	chr3	127317066	127341276	4899	+	50.74	q21.3	protein_coding	MCM2	minichromosome maintenance complex component 2 [Source:HGNC Symbol;Acc:6944]
1185	ENSG00000073146	13.5714	0.321529	0.398266	0.807322	0.419481	0.659372	chr22	50528308	50600119	6872	+	47.64	q13.33	protein_coding	MOV10L1	Mov10l1, Moloney leukemia virus 10-like 1, homolog (mouse) [Source:HGNC Symbol;Acc:7201]
1186	ENSG00000073150	23.507	1.37512	0.508878	2.70227	0.00688687	0.0450092	chr22	50609160	50618723	3102	+	64.18	q13.33	protein_coding	PANX2	pannexin 2 [Source:HGNC Symbol;Acc:8600]
1187	ENSG00000073169	1452.37	-0.251143	0.10254	-2.44923	0.0143162	0.0759015	chr22	50639408	50656045	2363	+	55.78	q13.33	protein_coding	SELO	Selenoprotein O [Source:UniProtKB/Swiss-Prot;Acc:Q9BVL4]
1188	ENSG00000073282	5649.32	0.935256	0.336302	2.781	0.00541915	0.0379393	chr3	189349205	189615068	7454	+	37.13	q28	protein_coding	TP63	tumor protein p63 [Source:HGNC Symbol;Acc:15979]
1189	ENSG00000073331	1027.35	0.670837	0.339134	1.97809	0.0479191	0.173374	chr4	113206665	113363776	12325	+	40.45	q25	protein_coding	ALPK1	alpha-kinase 1 [Source:HGNC Symbol;Acc:20917]
1190	ENSG00000073350	170.771	0.0509052	0.284717	0.178792	0.858101	0.937555	chr17	73521161	73571289	7909	+	56.06	q25.1	protein_coding	LLGL2	lethal giant larvae homolog 2 (Drosophila) [Source:HGNC Symbol;Acc:6629]
1191	ENSG00000073417	2639.17	0.353693	0.139697	2.53185	0.0113463	0.0643874	chr15	85523671	85682376	7886	+	41.8	q25.3	protein_coding	PDE8A	phosphodiesterase 8A [Source:HGNC Symbol;Acc:8793]
1192	ENSG00000073464	9732.68	-0.522282	0.186177	-2.8053	0.00502701	0.0358635	chrX	10125024	10205700	6750	+	45.22	p22.2	protein_coding	CLCN4	chloride channel, voltage-sensitive 4 [Source:HGNC Symbol;Acc:2022]
1193	ENSG00000073536	588.67	0.397141	0.110634	3.5897	0.000331062	0.0049097	chr17	33455772	33469334	5463	-	52.13	q12	protein_coding	NLE1	notchless homolog 1 (Drosophila) [Source:HGNC Symbol;Acc:19889]
1194	ENSG00000073578	23525.4	-0.448024	0.187147	-2.39397	0.0166671	0.0843627	chr5	218356	256815	8383	+	46.07	p15.33	protein_coding	SDHA	succinate dehydrogenase complex, subunit A, flavoprotein (Fp) [Source:HGNC Symbol;Acc:10680]
1195	ENSG00000073584	4907.35	0.20486	0.0808677	2.53327	0.0113004	0.0641675	chr17	38781214	38804760	11023	-	37.72	q21.2	protein_coding	SMARCE1	SWI/SNF related, matrix associated, actin dependent regulator of chromatin, subfamily e, member 1 [Source:HGNC Symbol;Acc:11109]
1196	ENSG00000073598	26.0571	0.298184	0.271932	1.09654	0.272843	0.517661	chr17	33448598	33457751	1388	+	48.35	q12	protein_coding	FNDC8	fibronectin type III domain containing 8 [Source:HGNC Symbol;Acc:25286]
1197	ENSG00000073605	555.341	-0.046022	0.146591	-0.313948	0.753561	0.883632	chr17	38060848	38076107	5917	-	48.85	q12	protein_coding	GSDMB	gasdermin B [Source:HGNC Symbol;Acc:23690]
1198	ENSG00000073614	8858.18	-0.0230928	0.0881756	-0.261896	0.793402	0.905731	chr12	389295	498620	12091	-	39.46	p13.33	protein_coding	KDM5A	lysine (K)-specific demethylase 5A [Source:HGNC Symbol;Acc:9886]
1199	ENSG00000073670	68.0132	0.512531	0.296188	1.73042	0.0835548	0.249141	chr17	42836399	42859214	4770	+	59.28	q21.31	protein_coding	ADAM11	ADAM metallopeptidase domain 11 [Source:HGNC Symbol;Acc:189]
1200	ENSG00000073711	26002.3	-0.299692	0.202887	-1.47714	0.139639	0.34494	chr3	135684515	135866733	7839	+	39.07	q22.2	protein_coding	PPP2R3A	protein phosphatase 2, regulatory subunit B'', alpha [Source:HGNC Symbol;Acc:9307]
1201	ENSG00000073712	5910.1	-0.163615	0.17654	-0.926787	0.354037	0.600941	chr14	53323986	53419153	8510	-	39.3	q22.1	protein_coding	FERMT2	fermitin family member 2 [Source:HGNC Symbol;Acc:15767]
1202	ENSG00000073734	4.9637	0.127633	0.934878	0.136524	0.891407	0.953701	chr2	169779448	169887832	5151	-	36.93	q31.1	protein_coding	ABCB11	ATP-binding cassette, sub-family B (MDR/TAP), member 11 [Source:HGNC Symbol;Acc:42]
1203	ENSG00000073737	44.5234	1.35156	0.615689	2.19519	0.0281497	0.120353	chr2	169921299	169952677	3751	+	39.63	q31.1	protein_coding	DHRS9	dehydrogenase/reductase (SDR family) member 9 [Source:HGNC Symbol;Acc:16888]
1204	ENSG00000073756	42.9331	0.255507	0.406004	0.629321	0.529139	0.744548	chr1	186640923	186649559	5269	-	34.87	q31.1	protein_coding	PTGS2	prostaglandin-endoperoxide synthase 2 (prostaglandin G/H synthase and cyclooxygenase) [Source:HGNC Symbol;Acc:9605]
1205	ENSG00000073792	169.571	-0.369364	0.261867	-1.4105	0.158391	0.373684	chr3	185361527	185542844	4735	-	42.54	q27.2	protein_coding	IGF2BP2	insulin-like growth factor 2 mRNA binding protein 2 [Source:HGNC Symbol;Acc:28867]
1206	ENSG00000073803	1217.9	-0.0381631	0.136968	-0.278629	0.78053	0.898794	chr3	185000729	185206885	12623	+	40.07	q27.2	protein_coding	MAP3K13	mitogen-activated protein kinase kinase kinase 13 [Source:HGNC Symbol;Acc:6852]
1207	ENSG00000073849	2280.69	0.269804	0.214597	1.25726	0.20866	0.441806	chr3	186648274	186796341	9151	+	44.38	q27.3	protein_coding	ST6GAL1	ST6 beta-galactosamide alpha-2,6-sialyltranferase 1 [Source:HGNC Symbol;Acc:10860]
1208	ENSG00000073861	22.3153	-0.636272	0.485437	-1.31072	0.189952	0.417725	chr17	45810610	45823485	2614	+	53.22	q21.32	protein_coding	TBX21	T-box 21 [Source:HGNC Symbol;Acc:11599]
1209	ENSG00000073905	2100.69	-0.719577	0.162727	-4.422	9.78e-06	0.000322789	chrX	80184999	80185846	848	+	47.76	q21.1	pseudogene	VDAC1P1	voltage-dependent anion channel 1 pseudogene 1 [Source:HGNC Symbol;Acc:12671]
1210	ENSG00000073910	8519.99	-0.733141	0.305362	-2.40089	0.0163552	0.0832288	chr13	32605437	32870794	16059	+	38.87	q13.1	protein_coding	FRY	furry homolog (Drosophila) [Source:HGNC Symbol;Acc:20367]
1211	ENSG00000073921	9100.85	0.190926	0.0800849	2.38404	0.0171236	0.0858281	chr11	85668727	85780924	5833	-	37.33	q14.2	protein_coding	PICALM	phosphatidylinositol binding clathrin assembly protein [Source:HGNC Symbol;Acc:15514]
1212	ENSG00000073969	4661.02	-0.655387	0.16871	-3.88469	0.000102461	0.00202698	chr17	44668035	44834830	5009	+	38.62	q21.31	protein_coding	NSF	N-ethylmaleimide-sensitive factor [Source:HGNC Symbol;Acc:8016]
1213	ENSG00000074047	268.447	0.481172	0.213512	2.25361	0.024221	0.10873	chr2	121493199	121750229	7341	+	52.42	q14.2	protein_coding	GLI2	GLI family zinc finger 2 [Source:HGNC Symbol;Acc:4318]
1214	ENSG00000074054	19943.8	-0.184803	0.0909894	-2.03104	0.0422511	0.159381	chr2	122095352	122407163	11099	-	41.05	q14.3	protein_coding	CLASP1	cytoplasmic linker associated protein 1 [Source:HGNC Symbol;Acc:17088]
1215	ENSG00000074071	2300.16	-0.389559	0.154146	-2.5272	0.0114975	0.0650013	chr16	1821891	1823156	1097	-	65.4	p13.3	protein_coding	MRPS34	mitochondrial ribosomal protein S34 [Source:HGNC Symbol;Acc:16618]
1216	ENSG00000074181	9501.66	-0.1915	0.235009	-0.814861	0.415152	0.65612	chr19	15270444	15311792	8799	-	55.04	p13.12	protein_coding	NOTCH3	notch 3 [Source:HGNC Symbol;Acc:7883]
1217	ENSG00000074201	3895.14	0.180743	0.125152	1.44419	0.148685	0.359302	chr11	77225981	77348850	4592	-	41.76	q14.1	protein_coding	CLNS1A	chloride channel, nucleotide-sensitive, 1A [Source:HGNC Symbol;Acc:2080]
1218	ENSG00000074211	66.3895	-0.512249	0.887579	-0.57713	0.563851	0.768447	chr4	6322305	6565327	9198	-	51.48	p16.1	protein_coding	PPP2R2C	protein phosphatase 2, regulatory subunit B, gamma [Source:HGNC Symbol;Acc:9306]
1219	ENSG00000074219	675.26	-0.0881356	0.338426	-0.260428	0.794533	0.906376	chr19	49843852	49865714	2980	-	53.57	q13.33	protein_coding	TEAD2	TEA domain family member 2 [Source:HGNC Symbol;Acc:11715]
1220	ENSG00000074266	1091.7	-0.0378613	0.101546	-0.372848	0.709262	0.860104	chr11	85955586	85989855	7016	+	37.1	q14.2	protein_coding	EED	embryonic ectoderm development [Source:HGNC Symbol;Acc:3188]	MI0022600	hsa-mir-6755
1221	ENSG00000074276	43.7821	-0.0158728	0.258323	-0.0614458	0.951004	0.978613	chr5	175969512	176022975	5348	+	53.78	q35.2	protein_coding	CDHR2	cadherin-related family member 2 [Source:HGNC Symbol;Acc:18231]
1222	ENSG00000074317	21.0524	-0.949924	0.747857	-1.27019	0.204015	0.436286	chr5	176047085	176057530	1979	-	56.89	q35.2	protein_coding	SNCB	synuclein, beta [Source:HGNC Symbol;Acc:11140]
1223	ENSG00000074319	2775.19	-0.220818	0.135055	-1.63502	0.102045	0.282535	chr11	18489883	18548779	3839	-	39.7	p15.1	protein_coding	TSG101	tumor susceptibility 101 [Source:HGNC Symbol;Acc:15971]
1224	ENSG00000074356	1926.69	0.0059372	0.107015	0.0554799	0.955756	0.980837	chr17	3714460	3749545	5717	-	43.79	p13.2	protein_coding	C17orf85	chromosome 17 open reading frame 85 [Source:HGNC Symbol;Acc:24612]
1225	ENSG00000074370	327.819	-0.31268	0.209855	-1.48998	0.136229	0.339257	chr17	3827169	3867736	6866	-	56.88	p13.2	protein_coding	ATP2A3	ATPase, Ca++ transporting, ubiquitous [Source:HGNC Symbol;Acc:813]
1226	ENSG00000074410	33.3768	-0.0809944	0.581556	-0.139272	0.889235	0.952669	chr15	63613577	63674360	7313	-	48.45	q22.2	protein_coding	CA12	carbonic anhydrase XII [Source:HGNC Symbol;Acc:1371]
1227	ENSG00000074416	7340.83	-0.182797	0.162831	-1.12262	0.261599	0.504514	chr3	127407909	127542051	10056	-	49.31	q21.3	protein_coding	MGLL	monoglyceride lipase [Source:HGNC Symbol;Acc:17038]
1228	ENSG00000074527	1871.64	-0.114691	0.263033	-0.436032	0.662814	0.831241	chr12	96051583	96184930	4166	-	40.1	q22	protein_coding	NTN4	netrin 4 [Source:HGNC Symbol;Acc:13658]
1229	ENSG00000074582	1489.49	-0.22052	0.0959762	-2.29765	0.0215818	0.100462	chr2	219523487	219528166	3379	+	54.42	q35	protein_coding	BCS1L	BC1 (ubiquinol-cytochrome c reductase) synthesis-like [Source:HGNC Symbol;Acc:1020]
1230	ENSG00000074590	4492.74	0.0473757	0.167599	0.282673	0.777427	0.896915	chr12	106457118	106533811	7008	-	45.97	q23.3	protein_coding	NUAK1	NUAK family, SNF1-like kinase, 1 [Source:HGNC Symbol;Acc:14311]
1231	ENSG00000074603	9539.86	-0.510354	0.180253	-2.83131	0.00463574	0.0337826	chr15	65734801	65810042	10211	-	40.97	q22.31	protein_coding	DPP8	dipeptidyl-peptidase 8 [Source:HGNC Symbol;Acc:16490]
1232	ENSG00000074621	957.575	0.610112	0.179092	3.40669	0.000657564	0.00825465	chr15	65903704	65953333	9084	+	44.73	q22.31	protein_coding	SLC24A1	solute carrier family 24 (sodium/potassium/calcium exchanger), member 1 [Source:HGNC Symbol;Acc:10975]
1233	ENSG00000074657	12516.4	-0.0694052	0.159184	-0.436007	0.662832	0.831241	chr18	56529832	56653712	11951	+	43.34	q21.32	protein_coding	ZNF532	zinc finger protein 532 [Source:HGNC Symbol;Acc:30940]
1234	ENSG00000074660	1349.41	-0.313186	0.184078	-1.70137	0.088873	0.258729	chr17	1537152	1549041	4957	-	58.07	p13.3	protein_coding	SCARF1	scavenger receptor class F, member 1 [Source:HGNC Symbol;Acc:16820]
1235	ENSG00000074695	8851.31	-0.281891	0.16212	-1.73878	0.0820738	0.245989	chr18	56995055	57027194	6767	-	37.33	q21.32	protein_coding	LMAN1	lectin, mannose-binding, 1 [Source:HGNC Symbol;Acc:6631]
1236	ENSG00000074696	1410.45	0.0479882	0.108554	0.442068	0.65844	0.828792	chr15	65822756	65870687	4469	+	42.55	q22.31	protein_coding	PTPLAD1	protein tyrosine phosphatase-like A domain containing 1 [Source:HGNC Symbol;Acc:24175]
1237	ENSG00000074706	58.0088	0.529018	0.249964	2.11638	0.0343126	0.137856	chr6	154475631	154677926	8474	-	40.14	q25.2	protein_coding	IPCEF1	interaction protein for cytohesin exchange factors 1 [Source:HGNC Symbol;Acc:21204]
1238	ENSG00000074755	12148.8	-0.0835212	0.160381	-0.520766	0.60253	0.793217	chr17	3907739	4046314	15878	-	44.49	p13.2	protein_coding	ZZEF1	zinc finger, ZZ-type with EF-hand domain 1 [Source:HGNC Symbol;Acc:29027]
1239	ENSG00000074800	8098.08	0.265572	0.137661	1.92918	0.0537087	0.186988	chr1	8921061	8939308	3958	-	50.23	p36.23	protein_coding	ENO1	enolase 1, (alpha) [Source:HGNC Symbol;Acc:3350]
1240	ENSG00000074803	100.44	0.440856	0.502535	0.877264	0.380343	0.625268	chr15	48483861	48596275	12476	+	38.11	q21.1	protein_coding	SLC12A1	solute carrier family 12 (sodium/potassium/chloride transporter), member 1 [Source:HGNC Symbol;Acc:10910]
1241	ENSG00000074842	500.678	-0.0908669	0.129576	-0.701265	0.483138	0.710942	chr19	4641386	4670382	1678	-	54.74	p13.3	protein_coding	C19orf10	chromosome 19 open reading frame 10 [Source:HGNC Symbol;Acc:16948]
1242	ENSG00000074855	982.217	-0.629933	0.165384	-3.80891	0.000139581	0.00255956	chr19	17434032	17445638	4979	-	62.67	p13.11	protein_coding	ANO8	anoctamin 8 [Source:HGNC Symbol;Acc:29329]
1243	ENSG00000074935	1352.71	0.0331073	0.137012	0.241638	0.80906	0.914042	chr6	112391980	112408732	6973	-	34.64	q21	protein_coding	TUBE1	tubulin, epsilon 1 [Source:HGNC Symbol;Acc:20775]
1244	ENSG00000074964	9520.4	-0.578978	0.144533	-4.00587	6.18e-05	0.00137739	chr1	17866330	18024369	7847	+	54.36	p36.13	protein_coding	ARHGEF10L	Rho guanine nucleotide exchange factor (GEF) 10-like [Source:HGNC Symbol;Acc:25540]
1245	ENSG00000074966	120.531	0.76238	0.265899	2.86718	0.00414151	0.0311856	chr4	48068410	48136273	3472	-	39.46	p12	protein_coding	TXK	TXK tyrosine kinase [Source:HGNC Symbol;Acc:12434]
1246	ENSG00000075035	88.7375	-0.0718354	0.607038	-0.118337	0.9058	0.959569	chr12	108523248	108644314	6557	+	46.99	q23.3	protein_coding	WSCD2	WSC domain containing 2 [Source:HGNC Symbol;Acc:29117]
1247	ENSG00000075043	31.0031	1.64121	0.783109	2.09576	0.0361034	0.143022	chr20	62037542	62103993	4029	-	62.2	q13.33	protein_coding	KCNQ2	potassium voltage-gated channel, KQT-like subfamily, member 2 [Source:HGNC Symbol;Acc:6296]
1248	ENSG00000075073	273.964	0.148883	0.302434	0.492281	0.62252	0.805845	chr10	71163659	71176623	2871	-	51.99	q22.1	protein_coding	TACR2	tachykinin receptor 2 [Source:HGNC Symbol;Acc:11527]
1249	ENSG00000075089	885.066	-0.261498	0.102169	-2.55946	0.0104834	0.0607555	chr12	100592900	100635643	3813	+	41	q23.1	protein_coding	ACTR6	ARP6 actin-related protein 6 homolog (yeast) [Source:HGNC Symbol;Acc:24025]
1250	ENSG00000075131	376.36	0.163285	0.164436	0.992998	0.320711	0.568444	chr15	66628544	66679084	2755	-	44.05	q22.31	protein_coding	TIPIN	TIMELESS interacting protein [Source:HGNC Symbol;Acc:30750]
1251	ENSG00000075142	1110.55	0.24396	0.0712618	3.42344	0.000618343	0.00791136	chr7	87834433	87856308	4237	-	39.53	q21.12	protein_coding	SRI	sorcin [Source:HGNC Symbol;Acc:11292]
1252	ENSG00000075151	12477.1	-0.415968	0.192055	-2.16587	0.030321	0.126684	chr1	21132963	21503377	8353	-	39.36	p36.12	protein_coding	EIF4G3	eukaryotic translation initiation factor 4 gamma, 3 [Source:HGNC Symbol;Acc:3298]
1253	ENSG00000075188	675.829	-0.0718272	0.11372	-0.631615	0.527639	0.743644	chr12	102467967	102513902	2406	-	36.53	q23.2	protein_coding	NUP37	nucleoporin 37kDa [Source:HGNC Symbol;Acc:29929]
1254	ENSG00000075213	46.197	-0.0995315	0.536439	-0.185541	0.852805	0.93537	chr7	83585093	84122040	9371	-	34.35	q21.11	protein_coding	SEMA3A	sema domain, immunoglobulin domain (Ig), short basic domain, secreted, (semaphorin) 3A [Source:HGNC Symbol;Acc:10723]
1255	ENSG00000075218	25.3254	1.01696	0.309899	3.28158	0.00103229	0.0113933	chr22	46692638	46726707	4242	+	50.13	q13.31	protein_coding	GTSE1	G-2 and S-phase expressed 1 [Source:HGNC Symbol;Acc:13698]
1256	ENSG00000075223	11214.3	0.288986	0.363424	0.795174	0.426512	0.665758	chr7	80371854	80551675	6268	-	35.82	q21.11	protein_coding	SEMA3C	sema domain, immunoglobulin domain (Ig), short basic domain, secreted, (semaphorin) 3C [Source:HGNC Symbol;Acc:10725]
1257	ENSG00000075234	1306.56	-0.103279	0.21025	-0.491222	0.62327	0.806299	chr22	46663858	46689905	3578	+	54.16	q13.31	protein_coding	TTC38	tetratricopeptide repeat domain 38 [Source:HGNC Symbol;Acc:26082]
1258	ENSG00000075239	16855.2	-0.700184	0.264174	-2.65046	0.00803819	0.0504444	chr11	107992243	108018503	5584	+	42.49	q22.3	protein_coding	ACAT1	acetyl-CoA acetyltransferase 1 [Source:HGNC Symbol;Acc:93]
1259	ENSG00000075240	2131.78	0.277654	0.14451	1.92135	0.0546871	0.189368	chr22	46971909	47075688	4886	+	57.68	q13.31	protein_coding	GRAMD4	GRAM domain containing 4 [Source:HGNC Symbol;Acc:29113]
1260	ENSG00000075275	115.817	0.0799481	0.175789	0.454795	0.649257	0.823112	chr22	46756731	46933067	12817	-	53.93	q13.31	protein_coding	CELSR1	cadherin, EGF LAG seven-pass G-type receptor 1 [Source:HGNC Symbol;Acc:1850]
1261	ENSG00000075290	60.7001	0.0451877	0.326285	0.138492	0.889852	0.952984	chr10	102222798	102243501	2112	+	42.74	q24.31	protein_coding	WNT8B	wingless-type MMTV integration site family, member 8B [Source:HGNC Symbol;Acc:12789]
1262	ENSG00000075292	23056.6	-0.200905	0.081089	-2.47759	0.0132274	0.0717464	chr2	71503691	71662199	14127	+	38.16	p13.2	protein_coding	ZNF638	zinc finger protein 638 [Source:HGNC Symbol;Acc:17894]
1263	ENSG00000075303	735.198	-0.297796	0.162154	-1.83651	0.0662827	0.214049	chr7	87462883	87505672	5081	-	35.47	q21.12	protein_coding	SLC25A40	solute carrier family 25, member 40 [Source:HGNC Symbol;Acc:29680]
1264	ENSG00000075336	1926.45	-0.413688	0.156501	-2.64335	0.008209	0.0511151	chr18	71815746	71826197	3640	+	42.43	q22.3	protein_coding	TIMM21	translocase of inner mitochondrial membrane 21 homolog (yeast) [Source:HGNC Symbol;Acc:25010]
1265	ENSG00000075340	227.827	-0.210231	0.336647	-0.624485	0.532309	0.74703	chr2	70834750	70995357	12673	-	44.81	p13.3	protein_coding	ADD2	adducin 2 (beta) [Source:HGNC Symbol;Acc:244]
1266	ENSG00000075391	4063.8	-0.22241	0.134743	-1.65063	0.0988139	0.276878	chr1	178062864	178448644	11818	+	36.99	q25.2	protein_coding	RASAL2	RAS protein activator like 2 [Source:HGNC Symbol;Acc:9874]
1267	ENSG00000075399	632.734	-0.000964373	0.139169	-0.00692953	0.994471	0.997465	chr16	89773542	89787394	3428	-	59.54	q24.3	protein_coding	VPS9D1	VPS9 domain containing 1 [Source:HGNC Symbol;Acc:13526]
1268	ENSG00000075407	3158.07	0.103989	0.116104	0.895655	0.370437	0.616333	chr10	38383264	38414472	9626	+	38.86	p11.1	protein_coding	ZNF37A	zinc finger protein 37A [Source:HGNC Symbol;Acc:13102]
1269	ENSG00000075413	7978.14	-0.142384	0.0782614	-1.81934	0.0688596	0.21963	chr14	103851729	103970168	8891	+	42.15	q32.32	protein_coding	MARK3	MAP/microtubule affinity-regulating kinase 3 [Source:HGNC Symbol;Acc:6897]
1270	ENSG00000075415	37435.9	-0.26412	0.132234	-1.99737	0.0457854	0.168196	chr12	98987369	98995946	4685	+	41.8	q23.1	protein_coding	SLC25A3	solute carrier family 25 (mitochondrial carrier; phosphate carrier), member 3 [Source:HGNC Symbol;Acc:10989]
1271	ENSG00000075420	7235.92	0.125012	0.124518	1.00397	0.315393	0.563305	chr3	171757418	172119455	13299	+	39.76	q26.31	protein_coding	FNDC3B	fibronectin type III domain containing 3B [Source:HGNC Symbol;Acc:24670]
1272	ENSG00000075426	8766.08	1.04757	0.225441	4.64674	3.37e-06	0.000134357	chr2	28615315	28640179	7157	+	51.8	p23.2	protein_coding	FOSL2	FOS-like antigen 2 [Source:HGNC Symbol;Acc:3798]
1273	ENSG00000075461	47.0718	-0.188156	0.673709	-0.279284	0.780027	0.898473	chr17	64961026	65029514	3380	+	52.37	q24.2	protein_coding	CACNG4	calcium channel, voltage-dependent, gamma subunit 4 [Source:HGNC Symbol;Acc:1408]
1274	ENSG00000075539	7873.2	-0.0411721	0.0961656	-0.428137	0.668551	0.834918	chr4	48499378	48782339	18170	-	36.94	p11	protein_coding	FRYL	FRY-like [Source:HGNC Symbol;Acc:29127]
1275	ENSG00000075568	7816.73	-0.447405	0.130544	-3.42724	0.000609753	0.00784049	chr2	98372799	98612388	12991	-	39.29	q11.2	protein_coding	TMEM131	transmembrane protein 131 [Source:HGNC Symbol;Acc:30366]
1276	ENSG00000075618	583.482	0.450644	0.270082	1.66854	0.0952078	0.27044	chr7	5632439	5646286	3707	+	59.62	p22.1	protein_coding	FSCN1	fascin homolog 1, actin-bundling protein (Strongylocentrotus purpuratus) [Source:HGNC Symbol;Acc:11148]
1277	ENSG00000075624	29242.9	-0.253763	0.217988	-1.16411	0.244377	0.485384	chr7	5566782	5603415	3256	-	56.7	p22.1	protein_coding	ACTB	actin, beta [Source:HGNC Symbol;Acc:132]
1278	ENSG00000075643	147.56	-1.6826	0.469668	-3.58254	0.000340274	0.00500915	chr18	33767482	33852120	6281	+	42.76	q12.2	protein_coding	MOCOS	molybdenum cofactor sulfurase [Source:HGNC Symbol;Acc:18234]
1279	ENSG00000075651	1129.95	0.200655	0.229664	0.873687	0.382289	0.626976	chr3	171318195	171528740	9953	-	38.86	q26.31	protein_coding	PLD1	phospholipase D1, phosphatidylcholine-specific [Source:HGNC Symbol;Acc:9067]
1280	ENSG00000075702	2260.74	-1.3631	0.482717	-2.82381	0.0047457	0.034341	chr19	36545783	36596008	9775	+	51.45	q13.12	protein_coding	WDR62	WD repeat domain 62 [Source:HGNC Symbol;Acc:24502]
1281	ENSG00000075711	5443.24	-0.152145	0.153299	-0.992473	0.320967	0.568645	chr3	196769431	197026171	11001	-	36.59	q29	protein_coding	DLG1	discs, large homolog 1 (Drosophila) [Source:HGNC Symbol;Acc:2900]
1282	ENSG00000075785	5929.99	-0.665731	0.201465	-3.30445	0.000951645	0.0107129	chr3	128444965	128533639	2717	+	44.06	q21.3	protein_coding	RAB7A	RAB7A, member RAS oncogene family [Source:HGNC Symbol;Acc:9788]
1283	ENSG00000075790	4732.76	-0.461167	0.194716	-2.36841	0.0178648	0.0881914	chr7	107220422	107269615	8409	+	37.42	q22.3	protein_coding	BCAP29	B-cell receptor-associated protein 29 [Source:HGNC Symbol;Acc:24131]
1284	ENSG00000075826	5145.48	-0.249944	0.191208	-1.30718	0.19115	0.419368	chr10	102246399	102289628	8360	-	46.47	q24.31	protein_coding	SEC31B	SEC31 homolog B (S. cerevisiae) [Source:HGNC Symbol;Acc:23197]
1285	ENSG00000075856	3605.6	-0.118569	0.123944	-0.956632	0.338753	0.586508	chr12	108916357	108955176	7270	-	42.65	q23.3	protein_coding	SART3	squamous cell carcinoma antigen recognized by T cells 3 [Source:HGNC Symbol;Acc:16860]
1286	ENSG00000075884	239.199	0.0976198	0.19851	0.491762	0.622887	0.806095	chr2	143848931	144525921	7743	+	36.48	q22.2	protein_coding	ARHGAP15	Rho GTPase activating protein 15 [Source:HGNC Symbol;Acc:21030]
1287	ENSG00000075886	41.5306	-0.111738	0.255809	-0.436802	0.662255	0.831139	chr2	132233666	132240507	1598	+	52.09	q21.1	protein_coding	TUBA3D	tubulin, alpha 3d [Source:HGNC Symbol;Acc:24071]
1288	ENSG00000075914	3238.35	-0.246933	0.253134	-0.975503	0.329311	0.577526	chr3	45016733	45077558	4442	+	46.87	p21.31	protein_coding	EXOSC7	exosome component 7 [Source:HGNC Symbol;Acc:28112]
1289	ENSG00000075945	2816.48	0.177498	0.0945022	1.87824	0.0603484	0.201442	chr1	169890467	170054349	5014	-	34.27	q24.2	protein_coding	KIFAP3	kinesin-associated protein 3 [Source:HGNC Symbol;Acc:17060]
1290	ENSG00000075975	4114.99	-0.00128858	0.158789	-0.00811506	0.993525	0.996794	chr3	12598513	12625212	2848	+	45.18	p25.2	protein_coding	MKRN2	makorin ring finger protein 2 [Source:HGNC Symbol;Acc:7113]
1291	ENSG00000076003	1052.95	0.115393	0.163031	0.707795	0.479072	0.707888	chr2	136597196	136633996	4118	-	40.28	q21.3	protein_coding	MCM6	minichromosome maintenance complex component 6 [Source:HGNC Symbol;Acc:6949]
1292	ENSG00000076043	1995.08	0.0103883	0.144281	0.0720003	0.942602	0.975363	chr11	114310108	114321001	3699	+	39.61	q23.2	protein_coding	REXO2	RNA exonuclease 2 [Source:HGNC Symbol;Acc:17851]
1293	ENSG00000076053	1474.18	0.0632267	0.134184	0.471195	0.637501	0.815413	chr11	114270752	114284925	7885	+	38.27	q23.2	protein_coding	RBM7	RNA binding motif protein 7 [Source:HGNC Symbol;Acc:9904]
1294	ENSG00000076067	1337.36	-0.259055	0.187461	-1.38191	0.166998	0.38631	chr12	56915713	56984745	3570	+	43.87	q13.3	protein_coding	RBMS2	RNA binding motif, single stranded interacting protein 2 [Source:HGNC Symbol;Acc:9909]
1295	ENSG00000076108	5002.16	-0.0838787	0.110434	-0.759537	0.447531	0.683113	chr12	56989380	57030600	10918	-	48.64	q13.3	protein_coding	BAZ2A	bromodomain adjacent to zinc finger domain, 2A [Source:HGNC Symbol;Acc:962]
1296	ENSG00000076201	2397.31	-0.340269	0.200009	-1.70127	0.0888925	0.258752	chr3	47422501	47454931	5981	+	51.53	p21.31	protein_coding	PTPN23	protein tyrosine phosphatase, non-receptor type 23 [Source:HGNC Symbol;Acc:14406]
1297	ENSG00000076242	5419.47	0.0110071	0.145202	0.0758053	0.939574	0.97429	chr3	37034823	37107380	3748	+	42.01	p22.2	protein_coding	MLH1	mutL homolog 1 [Source:HGNC Symbol;Acc:7127]
1298	ENSG00000076248	2417.66	0.482786	0.23907	2.01943	0.0434424	0.162539	chr12	109535379	109548797	2567	+	47.32	q24.11	protein_coding	UNG	uracil-DNA glycosylase [Source:HGNC Symbol;Acc:12572]
1299	ENSG00000076258	196.003	0.153134	0.324925	0.47129	0.637434	0.815358	chr1	171283347	171311223	2517	+	40.13	q24.3	protein_coding	FMO4	flavin containing monooxygenase 4 [Source:HGNC Symbol;Acc:3772]
1300	ENSG00000076321	2009.61	-0.206194	0.118887	-1.73437	0.0828529	0.24761	chr1	173684080	173755840	4254	+	38.32	q25.1	protein_coding	KLHL20	kelch-like family member 20 [Source:HGNC Symbol;Acc:25056]
1301	ENSG00000076344	402.791	0.110109	0.301686	0.364978	0.715128	0.863451	chr16	318300	325980	4798	-	64.56	p13.3	protein_coding	RGS11	regulator of G-protein signaling 11 [Source:HGNC Symbol;Acc:9993]
1302	ENSG00000076351	1358.25	-0.0372117	0.130169	-0.285873	0.774975	0.895608	chr17	26721661	26734215	7951	-	52.4	q11.2	protein_coding	SLC46A1	solute carrier family 46 (folate transporter), member 1 [Source:HGNC Symbol;Acc:30521]
1303	ENSG00000076356	5189.08	0.498659	0.194506	2.56372	0.0103557	0.0602469	chr1	208195587	208417665	13781	-	47.98	q32.2	protein_coding	PLXNA2	plexin A2 [Source:HGNC Symbol;Acc:9100]
1304	ENSG00000076382	176.75	1.17633	0.228486	5.14835	2.63e-07	1.71e-05	chr17	26904588	26926297	5467	-	46.5	q11.2	protein_coding	SPAG5	sperm associated antigen 5 [Source:HGNC Symbol;Acc:13452]
1305	ENSG00000076513	2544.22	0.0103223	0.116564	0.0885543	0.929436	0.969619	chr12	110436991	110477568	7350	+	44	q24.11	protein_coding	ANKRD13A	ankyrin repeat domain 13A [Source:HGNC Symbol;Acc:21268]
1306	ENSG00000076554	2401.72	-0.147383	0.129573	-1.13745	0.25535	0.49807	chr8	80870571	81143467	8341	-	40.35	q21.13	protein_coding	TPD52	tumor protein D52 [Source:HGNC Symbol;Acc:12005]
1307	ENSG00000076555	25636	-0.745387	0.172789	-4.31386	1.6e-05	0.000480192	chr12	109554400	109706031	14159	+	46.78	q24.11	protein_coding	ACACB	acetyl-CoA carboxylase beta [Source:HGNC Symbol;Acc:85]
1308	ENSG00000076604	186.105	0.685711	0.211429	3.24322	0.00118186	0.0126032	chr17	27071002	27077974	4594	+	59.64	q11.2	protein_coding	TRAF4	TNF receptor-associated factor 4 [Source:HGNC Symbol;Acc:12034]
1309	ENSG00000076641	1626.76	1.48524	0.316591	4.69134	2.71e-06	0.000113286	chr8	81880045	82024303	11023	-	40.56	q21.13	protein_coding	PAG1	phosphoprotein associated with glycosphingolipid microdomains 1 [Source:HGNC Symbol;Acc:30043]
1310	ENSG00000076650	630.946	-0.253003	0.146254	-1.72989	0.08365	0.249363	chr19	33571786	33621448	4488	+	45.71	q13.11	protein_coding	GPATCH1	G patch domain containing 1 [Source:HGNC Symbol;Acc:24658]
1311	ENSG00000076662	412.947	-0.468835	0.255335	-1.83616	0.0663341	0.214138	chr19	10444452	10450499	2950	-	56.15	p13.2	protein_coding	ICAM3	intercellular adhesion molecule 3 [Source:HGNC Symbol;Acc:5346]
1312	ENSG00000076685	13489.4	-0.517201	0.185216	-2.79242	0.00523158	0.0369497	chr10	104845940	104953056	7320	-	40.04	q24.33	protein_coding	NT5C2	5'-nucleotidase, cytosolic II [Source:HGNC Symbol;Acc:8022]
1313	ENSG00000076706	7387.04	1.24779	0.173843	7.17771	7.09e-13	1.96e-10	chr11	119179241	119192231	7420	-	59.59	q23.3	protein_coding	MCAM	melanoma cell adhesion molecule [Source:HGNC Symbol;Acc:6934]	MI0022601	hsa-mir-6756
1314	ENSG00000076716	2768.07	-0.0750865	0.274776	-0.273264	0.78465	0.901137	chrX	132434131	132549518	5057	-	41.25	q26.2	protein_coding	GPC4	glypican 4 [Source:HGNC Symbol;Acc:4452]
1315	ENSG00000076770	918.441	0.133473	0.220333	0.60578	0.544661	0.755891	chrX	131503345	131623996	12199	-	36.96	q26.2	protein_coding	MBNL3	muscleblind-like splicing regulator 3 [Source:HGNC Symbol;Acc:20564]
1316	ENSG00000076826	35.4294	-0.298058	0.462157	-0.644926	0.518975	0.736613	chr19	7660788	7683190	4845	+	58.66	p13.2	protein_coding	CAMSAP3	calmodulin regulated spectrin-associated protein family, member 3 [Source:HGNC Symbol;Acc:29307]
1317	ENSG00000076864	16.9557	-0.153376	0.42122	-0.364123	0.715766	0.863837	chr1	21922708	21995801	5650	-	56.62	p36.12	protein_coding	RAP1GAP	RAP1 GTPase activating protein [Source:HGNC Symbol;Acc:9858]
1318	ENSG00000076924	1681.79	-0.384425	0.185668	-2.07049	0.0384064	0.149124	chr19	7684411	7694451	4673	-	60.82	p13.2	protein_coding	XAB2	XPA binding protein 2 [Source:HGNC Symbol;Acc:14089]
1319	ENSG00000076928	1137.76	-0.0203123	0.134388	-0.151146	0.879861	0.948439	chr19	42387228	42434302	8630	+	58.26	q13.2	protein_coding	ARHGEF1	Rho guanine nucleotide exchange factor (GEF) 1 [Source:HGNC Symbol;Acc:681]
1320	ENSG00000076944	70.3239	0.252637	0.251929	1.00281	0.315952	0.563716	chr19	7701767	7712759	5301	+	61.17	p13.2	protein_coding	STXBP2	syntaxin binding protein 2 [Source:HGNC Symbol;Acc:11445]
1321	ENSG00000076984	1859.23	-0.588896	0.150795	-3.90528	9.41e-05	0.00189256	chr19	7968728	7979363	5145	+	63.14	p13.2	protein_coding	MAP2K7	mitogen-activated protein kinase kinase 7 [Source:HGNC Symbol;Acc:6847]
1322	ENSG00000077009	6379.92	-0.281453	0.427656	-0.65813	0.510455	0.730729	chr19	3933101	3942414	1141	+	57.79	p13.3	protein_coding	NMRK2	nicotinamide riboside kinase 2 [Source:HGNC Symbol;Acc:17871]
1323	ENSG00000077044	14942.7	0.0575284	0.178064	0.323078	0.746637	0.880853	chr2	234263153	234380750	9441	+	47.76	q37.1	protein_coding	DGKD	diacylglycerol kinase, delta 130kDa [Source:HGNC Symbol;Acc:2851]
1324	ENSG00000077063	233.578	0.54686	0.252222	2.16817	0.0301458	0.126247	chr7	117350705	117514193	7035	-	38.77	q31.31	protein_coding	CTTNBP2	cortactin binding protein 2 [Source:HGNC Symbol;Acc:15679]
1325	ENSG00000077092	709.838	-0.137114	0.155409	-0.882281	0.377625	0.622823	chr3	25215823	25639423	3697	+	40.14	p24.2	protein_coding	RARB	retinoic acid receptor, beta [Source:HGNC Symbol;Acc:9865]
1326	ENSG00000077097	12511.7	-0.118789	0.072447	-1.63967	0.101073	0.28098	chr3	25639475	25706398	5965	-	35.14	p24.2	protein_coding	TOP2B	topoisomerase (DNA) II beta 180kDa [Source:HGNC Symbol;Acc:11990]
1327	ENSG00000077147	6763.14	0.00924769	0.08538	0.108312	0.913748	0.963055	chr10	98277866	98347209	7095	-	37.03	q24.1	protein_coding	TM9SF3	transmembrane 9 superfamily member 3 [Source:HGNC Symbol;Acc:21529]
1328	ENSG00000077150	934.643	0.494283	0.142468	3.46944	0.000521547	0.00697814	chr10	104153867	104162281	4479	+	61.37	q24.32	protein_coding	NFKB2	nuclear factor of kappa light polypeptide gene enhancer in B-cells 2 (p49/p100) [Source:HGNC Symbol;Acc:7795]
1329	ENSG00000077152	422.428	-0.300595	0.325542	-0.923367	0.355816	0.602703	chr1	202300785	202311108	1065	-	40.71	q32.1	protein_coding	UBE2T	ubiquitin-conjugating enzyme E2T (putative) [Source:HGNC Symbol;Acc:25009]
1330	ENSG00000077157	62396.3	-0.28017	0.202387	-1.38433	0.166256	0.385131	chr1	202317827	202561834	18537	+	39.63	q32.1	protein_coding	PPP1R12B	protein phosphatase 1, regulatory subunit 12B [Source:HGNC Symbol;Acc:7619]
1331	ENSG00000077232	4439.49	0.0246056	0.10035	0.245198	0.806303	0.912439	chr2	183580999	183659191	21586	+	36.28	q32.1	protein_coding	DNAJC10	DnaJ (Hsp40) homolog, subfamily C, member 10 [Source:HGNC Symbol;Acc:24637]
1332	ENSG00000077235	11927.9	-0.284447	0.12028	-2.36488	0.0180359	0.0887452	chr16	27470876	27561234	11562	-	49.42	p12.1	protein_coding	GTF3C1	general transcription factor IIIC, polypeptide 1, alpha 220kDa [Source:HGNC Symbol;Acc:4664]
1333	ENSG00000077238	742.409	0.433407	0.224618	1.92953	0.0536649	0.186886	chr16	27324989	27376099	6091	+	49.92	p12.1	protein_coding	IL4R	interleukin 4 receptor [Source:HGNC Symbol;Acc:6015]
1334	ENSG00000077254	4978.3	-0.0973207	0.0964173	-1.00937	0.312797	0.56084	chr1	78161672	78225537	6918	-	38.35	p31.1	protein_coding	USP33	ubiquitin specific peptidase 33 [Source:HGNC Symbol;Acc:20059]
1335	ENSG00000077264	202.794	0.172614	0.219448	0.786581	0.431527	0.670468	chrX	110187513	110470589	10312	+	39.22	q23	protein_coding	PAK3	p21 protein (Cdc42/Rac)-activated kinase 3 [Source:HGNC Symbol;Acc:8592]
1336	ENSG00000077274	713.622	1.12277	0.54577	2.05723	0.039664	0.152542	chrX	110488331	110513751	3568	-	41.36	q23	protein_coding	CAPN6	calpain 6 [Source:HGNC Symbol;Acc:1483]
1337	ENSG00000077279	35.2875	1.71493	0.765066	2.24155	0.0249907	0.111029	chrX	110537007	110655603	10139	-	39.48	q23	protein_coding	DCX	doublecortin [Source:HGNC Symbol;Acc:2714]
1338	ENSG00000077312	964.245	0.0603324	0.111188	0.542617	0.587393	0.783525	chr19	41256542	41271294	2361	+	50.77	q13.2	protein_coding	SNRPA	small nuclear ribonucleoprotein polypeptide A [Source:HGNC Symbol;Acc:11151]
1339	ENSG00000077327	17.009	-0.0515843	0.673005	-0.0766478	0.938904	0.974143	chr10	22634399	22743153	4006	+	38.38	p12.2	protein_coding	SPAG6	sperm associated antigen 6 [Source:HGNC Symbol;Acc:11215]
1340	ENSG00000077348	842.039	0.328059	0.180982	1.81267	0.0698833	0.221876	chr19	41892279	41903384	1488	-	52.53	q13.2	protein_coding	EXOSC5	exosome component 5 [Source:HGNC Symbol;Acc:24662]
1341	ENSG00000077380	4341.43	0.193856	0.0901564	2.15022	0.0315382	0.130215	chr2	172543919	172604930	4695	+	36.49	q31.1	protein_coding	DYNC1I2	dynein, cytoplasmic 1, intermediate chain 2 [Source:HGNC Symbol;Acc:2964]
1342	ENSG00000077420	177.988	0.394489	0.459104	0.859258	0.390198	0.633976	chr10	26727132	26856732	3981	+	41.55	p12.1	protein_coding	APBB1IP	amyloid beta (A4) precursor protein-binding, family B, member 1 interacting protein [Source:HGNC Symbol;Acc:17379]
1343	ENSG00000077454	1630.9	-0.0119086	0.151815	-0.0784417	0.937477	0.973471	chr7	100169855	100183776	8954	-	61.42	q22.1	protein_coding	LRCH4	leucine-rich repeats and calponin homology (CH) domain containing 4 [Source:HGNC Symbol;Acc:6691]
1344	ENSG00000077458	896.494	0.232291	0.107364	2.16357	0.030497	0.127228	chr11	95502106	95523573	6042	-	34.6	q21	protein_coding	FAM76B	family with sequence similarity 76, member B [Source:HGNC Symbol;Acc:28492]
1345	ENSG00000077463	270.088	-0.10888	0.142093	-0.766262	0.443521	0.679599	chr19	4174106	4182601	2787	-	57.91	p13.3	protein_coding	SIRT6	sirtuin 6 [Source:HGNC Symbol;Acc:14934]
1346	ENSG00000077498	5.20153	0.718869	0.642604	1.11868	0.263276	0.506473	chr11	88910620	89028927	3016	+	35.29	q14.3	protein_coding	TYR	tyrosinase [Source:HGNC Symbol;Acc:12442]
1347	ENSG00000077514	713.433	0.0160197	0.165245	0.0969456	0.92277	0.967384	chr11	74204896	74380162	5508	+	41.72	q13.4	protein_coding	POLD3	polymerase (DNA-directed), delta 3, accessory subunit [Source:HGNC Symbol;Acc:20932]
1348	ENSG00000077522	247659	-0.516568	0.335198	-1.54108	0.123297	0.318287	chr1	236849754	236927931	5419	+	43.06	q43	protein_coding	ACTN2	actinin, alpha 2 [Source:HGNC Symbol;Acc:164]
1349	ENSG00000077549	4778.99	-0.412583	0.157499	-2.61959	0.00880367	0.0536481	chr1	19665267	19812066	3476	-	49.22	p36.13	protein_coding	CAPZB	capping protein (actin filament) muscle Z-line, beta [Source:HGNC Symbol;Acc:1491]
1350	ENSG00000077585	162.111	0.355889	0.227789	1.56236	0.118203	0.310026	chr1	236305832	236385165	2279	+	43.62	q42.3	protein_coding	GPR137B	G protein-coupled receptor 137B [Source:HGNC Symbol;Acc:11862]
1351	ENSG00000077616	587.539	0.126015	0.146906	0.857794	0.391006	0.634506	chr11	89864683	89926062	7254	+	34.98	q14.3	protein_coding	NAALAD2	N-acetylated alpha-linked acidic dipeptidase 2 [Source:HGNC Symbol;Acc:14526]
1352	ENSG00000077684	3792.35	-0.0730137	0.0901785	-0.809658	0.418137	0.658532	chr4	129730779	129796379	9110	+	44.21	q28.2	protein_coding	JADE1	jade family PHD finger 1 [Source:HGNC Symbol;Acc:30027]
1353	ENSG00000077713	282.996	0.159056	0.238864	0.665884	0.505485	0.727144	chrX	118533023	118588441	3115	+	45.34	q24	protein_coding	SLC25A43	solute carrier family 25, member 43 [Source:HGNC Symbol;Acc:30557]
1354	ENSG00000077721	3304.81	-0.01348	0.147708	-0.0912611	0.927285	0.968864	chrX	118708501	118718381	3251	+	39.63	q24	protein_coding	UBE2A	ubiquitin-conjugating enzyme E2A [Source:HGNC Symbol;Acc:12472]
1355	ENSG00000077782	3986.33	0.0914757	0.132129	0.692321	0.488736	0.71561	chr8	38268656	38326352	12698	-	50.55	p11.22	protein_coding	FGFR1	fibroblast growth factor receptor 1 [Source:HGNC Symbol;Acc:3688]
1356	ENSG00000077800	51.6426	0.487355	0.355561	1.37067	0.170479	0.391426	chr7	72742167	72772634	2457	+	47.78	q11.23	protein_coding	FKBP6	FK506 binding protein 6, 36kDa [Source:HGNC Symbol;Acc:3722]
1357	ENSG00000077809	28547.5	0.0625729	0.143412	0.436317	0.662607	0.831241	chr7	74071994	74175026	10442	+	42.77	q11.23	protein_coding	GTF2I	general transcription factor IIi [Source:HGNC Symbol;Acc:4659]
1358	ENSG00000077935	99.1589	0.193215	0.216375	0.89296	0.371879	0.617413	chr22	45739944	45809500	4253	-	39.89	q13.31	protein_coding	SMC1B	structural maintenance of chromosomes 1B [Source:HGNC Symbol;Acc:11112]
1359	ENSG00000077942	3932.15	0.314332	0.351472	0.89433	0.371145	0.617145	chr22	45898118	45997015	7136	+	53.12	q13.31	protein_coding	FBLN1	fibulin 1 [Source:HGNC Symbol;Acc:3600]
1360	ENSG00000077943	1213.26	-0.383843	0.314778	-1.21941	0.22269	0.459216	chr10	15555948	15762124	7528	-	40.02	p13	protein_coding	ITGA8	integrin, alpha 8 [Source:HGNC Symbol;Acc:6144]
1361	ENSG00000077984	52.7889	-0.133875	0.242235	-0.552663	0.580494	0.779251	chr20	24929866	24940564	930	+	56.46	p11.21	protein_coding	CST7	cystatin F (leukocystatin) [Source:HGNC Symbol;Acc:2479]
1362	ENSG00000078018	670.913	-0.144772	0.274167	-0.528044	0.597468	0.790453	chr2	210288782	210598842	11559	+	35.9	q34	protein_coding	MAP2	microtubule-associated protein 2 [Source:HGNC Symbol;Acc:6839]
1363	ENSG00000078043	6149.74	0.223432	0.118323	1.88832	0.0589829	0.198697	chr18	44388353	44500123	9236	-	38.51	q21.1	protein_coding	PIAS2	protein inhibitor of activated STAT, 2 [Source:HGNC Symbol;Acc:17311]
1364	ENSG00000078053	350.244	0.477514	0.27851	1.71453	0.0864312	0.254344	chr7	38423305	38671167	5636	-	39.15	p14.1	protein_coding	AMPH	amphiphysin [Source:HGNC Symbol;Acc:471]
1365	ENSG00000078061	4563.49	-0.534249	0.147946	-3.61111	0.000304893	0.00461867	chrX	47420516	47431307	3497	+	51.23	p11.23	protein_coding	ARAF	v-raf murine sarcoma 3611 viral oncogene homolog [Source:HGNC Symbol;Acc:646]
1366	ENSG00000078070	2183.62	-0.00128801	0.116211	-0.0110833	0.991157	0.995677	chr3	182733006	182833863	4321	-	41.62	q27.1	protein_coding	MCCC1	methylcrotonoyl-CoA carboxylase 1 (alpha) [Source:HGNC Symbol;Acc:6936]
1367	ENSG00000078098	1398.62	0.939752	0.308813	3.04311	0.00234144	0.0205959	chr2	163027194	163101661	7003	-	36.7	q24.2	protein_coding	FAP	fibroblast activation protein, alpha [Source:HGNC Symbol;Acc:3590]
1368	ENSG00000078114	445.677	-0.619384	0.228344	-2.7125	0.00667778	0.0440062	chr10	21068902	21463116	13718	-	39.04	p12.31	protein_coding	NEBL	nebulette [Source:HGNC Symbol;Acc:16932]
1369	ENSG00000078124	796.215	0.261053	0.145243	1.79736	0.072279	0.226619	chr11	76571911	76737841	8442	+	38.74	q13.5	protein_coding	ACER3	alkaline ceramidase 3 [Source:HGNC Symbol;Acc:16066]
1370	ENSG00000078140	4519.78	-0.24199	0.125225	-1.93244	0.0533053	0.186259	chr4	39699664	39784412	5245	+	42.02	p14	protein_coding	UBE2K	ubiquitin-conjugating enzyme E2K [Source:HGNC Symbol;Acc:4914]
1371	ENSG00000078142	4385.14	-0.103023	0.0722009	-1.42689	0.153611	0.366439	chr18	39535171	39667794	15176	+	35.33	q12.3	protein_coding	PIK3C3	phosphatidylinositol 3-kinase, catalytic subunit type 3 [Source:HGNC Symbol;Acc:8974]
1372	ENSG00000078177	1254.7	0.623234	0.294397	2.11699	0.034261	0.137695	chr4	40058446	40159872	9835	+	40.52	p14	protein_coding	N4BP2	NEDD4 binding protein 2 [Source:HGNC Symbol;Acc:29851]
1373	ENSG00000078237	533.172	-0.87348	0.309551	-2.82176	0.00477611	0.034498	chr12	4430371	4462338	1602	+	40.43	p13.32	protein_coding	C12orf5	chromosome 12 open reading frame 5 [Source:HGNC Symbol;Acc:1185]
1374	ENSG00000078246	1035.76	-0.078695	0.0837905	-0.939187	0.347635	0.595149	chr12	2986389	3050306	3181	+	45	p13.33	protein_coding	TULP3	tubby like protein 3 [Source:HGNC Symbol;Acc:12425]
1375	ENSG00000078269	1528.88	-0.43966	0.234412	-1.87559	0.0607117	0.202155	chr6	158402888	158520208	9985	+	49.67	q25.3	protein_coding	SYNJ2	synaptojanin 2 [Source:HGNC Symbol;Acc:11504]
1376	ENSG00000078295	13560.8	-0.808647	0.180113	-4.48965	7.13e-06	0.000247678	chr5	7396321	7830194	17784	+	40.92	p15.31	protein_coding	ADCY2	adenylate cyclase 2 (brain) [Source:HGNC Symbol;Acc:233]
1377	ENSG00000078304	7445.69	-0.336733	0.137512	-2.44874	0.0143355	0.0759706	chr14	102228135	102394326	14289	+	44.63	q32.31	protein_coding	PPP2R5C	protein phosphatase 2, regulatory subunit B', gamma [Source:HGNC Symbol;Acc:9311]
1378	ENSG00000078319	1376.73	-0.563316	0.150811	-3.73525	0.000187529	0.00321813	chr7	99918615	99939531	1114	-	44.3	q22.1	pseudogene	PMS2P1	postmeiotic segregation increased 2 pseudogene 1 [Source:HGNC Symbol;Acc:9123]
1379	ENSG00000078328	8955.2	-0.0769639	0.2196	-0.350473	0.725984	0.868955	chr16	6069095	7763340	8213	+	41.37	p13.3	protein_coding	RBFOX1	RNA binding protein, fox-1 homolog (C. elegans) 1 [Source:HGNC Symbol;Acc:18222]
1380	ENSG00000078369	4293.59	0.0757789	0.107547	0.704609	0.481053	0.709608	chr1	1716729	1822495	6351	-	46.68	p36.33	protein_coding	GNB1	guanine nucleotide binding protein (G protein), beta polypeptide 1 [Source:HGNC Symbol;Acc:4396]
1381	ENSG00000078399	1666.21	-0.425915	0.142746	-2.98372	0.00284769	0.0238821	chr7	27202054	27210117	2550	-	54.79	p15.2	protein_coding	HOXA9	homeobox A9 [Source:HGNC Symbol;Acc:5109]	MI0001150	hsa-mir-196b
1382	ENSG00000078401	154.939	-0.188903	0.283941	-0.665289	0.505866	0.727367	chr6	12290596	12297427	2033	+	42.83	p24.1	protein_coding	EDN1	endothelin 1 [Source:HGNC Symbol;Acc:3176]
1383	ENSG00000078403	3298.33	-0.304323	0.0949984	-3.20345	0.0013579	0.013883	chr10	21823094	22032559	6844	+	39.66	p12.31	protein_coding	MLLT10	myeloid/lymphoid or mixed-lineage leukemia (trithorax homolog, Drosophila); translocated to, 10 [Source:HGNC Symbol;Acc:16063]
1384	ENSG00000078487	504.796	-0.154372	0.189606	-0.814171	0.415547	0.656399	chr7	99998449	100026615	3318	-	44.82	q22.1	protein_coding	ZCWPW1	zinc finger, CW type with PWWP domain 1 [Source:HGNC Symbol;Acc:23486]
1385	ENSG00000078549	343.325	0.0242625	0.204161	0.11884	0.905402	0.959462	chr7	31092076	31151089	6828	+	51.88	p14.3	protein_coding	ADCYAP1R1	adenylate cyclase activating polypeptide 1 (pituitary) receptor type I [Source:HGNC Symbol;Acc:242]
1386	ENSG00000078589	13.1296	0.712182	0.481419	1.47934	0.13905	0.344118	chrX	78200829	78217451	1803	+	38.45	q21.1	protein_coding	P2RY10	purinergic receptor P2Y, G-protein coupled, 10 [Source:HGNC Symbol;Acc:19906]
1387	ENSG00000078596	2064.37	0.387393	0.224952	1.72211	0.0850489	0.251942	chrX	78615881	78623164	2051	-	36.96	q21.1	protein_coding	ITM2A	integral membrane protein 2A [Source:HGNC Symbol;Acc:6173]
1388	ENSG00000078618	22452.8	-0.517486	0.166096	-3.11559	0.00183576	0.0173124	chr1	52254863	52344477	6619	-	39.33	p32.3	protein_coding	NRD1	nardilysin (N-arginine dibasic convertase) [Source:HGNC Symbol;Acc:7995]
1389	ENSG00000078668	20683.9	-0.508234	0.17796	-2.85589	0.00429166	0.0320144	chr8	42249142	42263415	3144	+	40.42	p11.21	protein_coding	VDAC3	voltage-dependent anion channel 3 [Source:HGNC Symbol;Acc:12674]
1390	ENSG00000078674	40850.9	-0.112927	0.0845902	-1.33499	0.18188	0.40659	chr8	17780349	17885478	12470	+	36.57	p22	protein_coding	PCM1	pericentriolar material 1 [Source:HGNC Symbol;Acc:8727]
1391	ENSG00000078687	4813.66	-0.470545	0.136358	-3.45081	0.000558897	0.0073453	chr17	76000249	76104916	11058	+	42.91	q25.3	protein_coding	TNRC6C	trinucleotide repeat containing 6C [Source:HGNC Symbol;Acc:29318]
1392	ENSG00000078699	2155.03	-0.205972	0.152883	-1.34725	0.1779	0.40126	chr20	32077881	32237842	9457	+	42.36	q11.21	protein_coding	CBFA2T2	core-binding factor, runt domain, alpha subunit 2; translocated to, 2 [Source:HGNC Symbol;Acc:1536]
1393	ENSG00000078725	50.2332	-0.10266	0.358076	-0.2867	0.774342	0.89516	chr9	121915736	122131745	3905	-	40.76	q33.1	protein_coding	BRINP1	bone morphogenetic protein/retinoic acid inducible neural-specific 1 [Source:HGNC Symbol;Acc:2687]
1394	ENSG00000078747	6418.73	-0.0451823	0.0926069	-0.487894	0.625625	0.807703	chr20	32951041	33099198	6664	+	40.53	q11.22	protein_coding	ITCH	itchy E3 ubiquitin protein ligase [Source:HGNC Symbol;Acc:13890]
1395	ENSG00000078795	1912.58	-0.698258	0.340742	-2.04923	0.04044	0.154667	chr5	137223657	137278436	4654	+	39.33	q31.2	protein_coding	PKD2L2	polycystic kidney disease 2-like 2 [Source:HGNC Symbol;Acc:9012]
1396	ENSG00000078804	3339.94	-0.920512	0.372648	-2.47019	0.0135041	0.0727431	chr20	33292094	33301243	4228	+	55.18	q11.22	protein_coding	TP53INP2	tumor protein p53 inducible nuclear protein 2 [Source:HGNC Symbol;Acc:16104]
1397	ENSG00000078808	3790.31	-0.2411	0.104327	-2.31099	0.0208333	0.098146	chr1	1152288	1167411	4709	-	61.35	p36.33	protein_coding	SDF4	stromal cell derived factor 4 [Source:HGNC Symbol;Acc:24188]
1398	ENSG00000078814	16184.9	-0.0355829	0.461489	-0.0771045	0.93854	0.974024	chr20	33563206	33590240	7929	+	57.85	q11.22	protein_coding	MYH7B	myosin, heavy chain 7B, cardiac muscle, beta [Source:HGNC Symbol;Acc:15906]
1399	ENSG00000078900	196.131	0.100436	0.167092	0.601083	0.547785	0.757833	chr1	3569084	3652765	6763	+	59.52	p36.32	protein_coding	TP73	tumor protein p73 [Source:HGNC Symbol;Acc:12003]
1400	ENSG00000078902	2498.41	-0.0519427	0.13526	-0.38402	0.700963	0.85518	chr11	1295601	1330884	5983	-	57.48	p15.5	protein_coding	TOLLIP	toll interacting protein [Source:HGNC Symbol;Acc:16476]
1401	ENSG00000078967	6118.63	-0.666175	0.243417	-2.73676	0.00620472	0.0417336	chr7	43966037	43995735	4713	+	45.79	p13	protein_coding	UBE2D4	ubiquitin-conjugating enzyme E2D 4 (putative) [Source:HGNC Symbol;Acc:21647]
1402	ENSG00000079102	1896	-0.256928	0.097917	-2.62393	0.00869211	0.0531754	chr8	92967203	93115514	13527	-	38.11	q21.3	protein_coding	RUNX1T1	runt-related transcription factor 1; translocated to, 1 (cyclin D-related) [Source:HGNC Symbol;Acc:1535]
1403	ENSG00000079112	44.8772	0.315375	0.487271	0.647227	0.517485	0.73555	chr8	95139399	95229531	3901	-	40.61	q22.1	protein_coding	CDH17	cadherin 17, LI cadherin (liver-intestine) [Source:HGNC Symbol;Acc:1756]
1404	ENSG00000079134	2560.38	0.17976	0.105601	1.70226	0.0887066	0.258405	chr18	214520	268050	8099	-	37.31	p11.32	protein_coding	THOC1	THO complex 1 [Source:HGNC Symbol;Acc:19070]
1405	ENSG00000079150	361.62	0.0658119	0.181539	0.362523	0.716961	0.864103	chr2	179328391	179343327	3080	-	37.58	q31.2	protein_coding	FKBP7	FK506 binding protein 7 [Source:HGNC Symbol;Acc:3723]
1406	ENSG00000079156	14308.5	0.735216	0.221042	3.32613	0.000880598	0.0101611	chr2	179059208	179264160	8028	+	39.35	q31.2	protein_coding	OSBPL6	oxysterol binding protein-like 6 [Source:HGNC Symbol;Acc:16388]
1407	ENSG00000079215	2979.6	0.621752	0.326995	1.90141	0.0572481	0.195063	chr5	36606457	36688436	6265	+	40.36	p13.2	protein_coding	SLC1A3	solute carrier family 1 (glial high affinity glutamate transporter), member 3 [Source:HGNC Symbol;Acc:10941]
1408	ENSG00000079246	14753.5	0.066163	0.0855155	0.773696	0.43911	0.676385	chr2	216972187	217071026	5463	+	39.46	q35	protein_coding	XRCC5	X-ray repair complementing defective repair in Chinese hamster cells 5 (double-strand-break rejoining) [Source:HGNC Symbol;Acc:12833]
1409	ENSG00000079257	755.161	-0.195724	0.105959	-1.84717	0.064722	0.210701	chr3	158363611	158390482	1504	-	36.96	q25.32	protein_coding	LXN	latexin [Source:HGNC Symbol;Acc:13347]
1410	ENSG00000079263	179.866	0.0675833	0.266607	0.253494	0.799886	0.909238	chr2	231067826	231223762	5829	+	41.09	q37.1	protein_coding	SP140	SP140 nuclear body protein [Source:HGNC Symbol;Acc:17133]
1411	ENSG00000079277	2087.53	-0.0870734	0.0945365	-0.921056	0.357021	0.603869	chr1	47023090	47082515	8060	-	48.24	p33	protein_coding	MKNK1	MAP kinase interacting serine/threonine kinase 1 [Source:HGNC Symbol;Acc:7110]
1412	ENSG00000079308	43761.9	-0.638707	0.179322	-3.56178	0.000368349	0.00533512	chr2	218664512	218867718	15595	-	52.38	q35	protein_coding	TNS1	tensin 1 [Source:HGNC Symbol;Acc:11973]
1413	ENSG00000079313	1350.37	-0.553587	0.163569	-3.38442	0.000713294	0.00877663	chr19	1815248	1848452	5186	-	60.93	p13.3	protein_coding	REXO1	REX1, RNA exonuclease 1 homolog (S. cerevisiae) [Source:HGNC Symbol;Acc:24616]	MI0008330	hsa-mir-1909
1414	ENSG00000079332	6411.86	-0.135509	0.102406	-1.32325	0.185754	0.41172	chr10	71907045	71930279	6914	-	40.56	q22.1	protein_coding	SAR1A	SAR1 homolog A (S. cerevisiae) [Source:HGNC Symbol;Acc:10534]
1415	ENSG00000079335	689.455	0.712422	0.241032	2.95572	0.00311943	0.0254839	chr1	100810584	100985833	5729	+	38.39	p21.2	protein_coding	CDC14A	cell division cycle 14A [Source:HGNC Symbol;Acc:1718]
1416	ENSG00000079337	2179.71	-0.319674	0.171902	-1.85963	0.0629383	0.206832	chr12	48128455	48164823	11995	-	54.44	q13.11	protein_coding	RAPGEF3	Rap guanine nucleotide exchange factor (GEF) 3 [Source:HGNC Symbol;Acc:16629]
1417	ENSG00000079385	337.513	-0.949874	0.199009	-4.77302	1.81e-06	8.18e-05	chr19	43011456	43065386	5524	-	47.52	q13.2	protein_coding	CEACAM1	carcinoembryonic antigen-related cell adhesion molecule 1 (biliary glycoprotein) [Source:HGNC Symbol;Acc:1814]
1418	ENSG00000079387	1215.56	0.0753476	0.133944	0.562529	0.573756	0.775046	chr12	48436681	48500091	6366	-	38.62	q13.11	protein_coding	SENP1	SUMO1/sentrin specific peptidase 1 [Source:HGNC Symbol;Acc:17927]
1419	ENSG00000079393	12449.7	-0.694057	0.276158	-2.51326	0.0119622	0.0667973	chr10	76854192	76868979	2349	-	54.86	q22.2	protein_coding	DUSP13	dual specificity phosphatase 13 [Source:HGNC Symbol;Acc:19681]
1420	ENSG00000079432	3697.68	-0.0871298	0.163767	-0.532034	0.594702	0.788757	chr19	42772689	42799949	9494	+	61.52	q13.2	protein_coding	CIC	capicua transcriptional repressor [Source:HGNC Symbol;Acc:14214]
1421	ENSG00000079435	633.506	0.308059	0.351402	0.876657	0.380673	0.625573	chr19	42905659	42931578	5206	-	54.96	q13.2	protein_coding	LIPE	lipase, hormone-sensitive [Source:HGNC Symbol;Acc:6621]
1422	ENSG00000079459	6559.31	-0.887499	0.157634	-5.63012	1.8e-08	1.74e-06	chr8	11653082	11696818	5202	+	44.36	p23.1	protein_coding	FDFT1	farnesyl-diphosphate farnesyltransferase 1 [Source:HGNC Symbol;Acc:3629]
1423	ENSG00000079462	128.845	-0.423205	0.310165	-1.36445	0.172426	0.394427	chr19	42801185	42807698	1419	-	53.73	q13.2	protein_coding	PAFAH1B3	platelet-activating factor acetylhydrolase 1b, catalytic subunit 3 (29kDa) [Source:HGNC Symbol;Acc:8576]
1424	ENSG00000079482	1727.96	-0.213309	0.160889	-1.32582	0.184901	0.410715	chrX	67262186	67653755	8224	-	39.75	q12	protein_coding	OPHN1	oligophrenin 1 [Source:HGNC Symbol;Acc:8148]
1425	ENSG00000079616	1085.78	-0.227842	0.214124	-1.06407	0.287298	0.533189	chr16	29802040	29816706	4312	+	50.19	p11.2	protein_coding	KIF22	kinesin family member 22 [Source:HGNC Symbol;Acc:6391]
1426	ENSG00000079691	392.392	0.131635	0.286547	0.459384	0.645958	0.821083	chr6	25279306	25620758	6881	+	39.54	p22.2	protein_coding	LRRC16A	leucine rich repeat containing 16A [Source:HGNC Symbol;Acc:21581]
1427	ENSG00000079739	54825.1	-1.01518	0.33095	-3.06747	0.00215879	0.0193979	chr1	64058947	64125916	4090	+	42.42	p31.3	protein_coding	PGM1	phosphoglucomutase 1 [Source:HGNC Symbol;Acc:8905]
1428	ENSG00000079785	9756.7	-0.462499	0.140125	-3.30061	0.000964759	0.01083	chr2	15731302	15771235	3817	+	39.49	p24.3	protein_coding	DDX1	DEAD (Asp-Glu-Ala-Asp) box helicase 1 [Source:HGNC Symbol;Acc:2734]
1429	ENSG00000079805	9330.21	-0.504684	0.0936677	-5.38803	7.12e-08	5.65e-06	chr19	10828755	10944164	13443	+	53.07	p13.2	protein_coding	DNM2	dynamin 2 [Source:HGNC Symbol;Acc:2974]
1430	ENSG00000079819	5259.2	-0.0656699	0.161224	-0.407322	0.683772	0.844495	chr6	131160487	131384462	10247	-	38.6	q23.2	protein_coding	EPB41L2	erythrocyte membrane protein band 4.1-like 2 [Source:HGNC Symbol;Acc:3379]
1431	ENSG00000079841	266.771	-0.223531	0.532539	-0.419746	0.674671	0.838688	chr6	72596406	73112845	12800	+	35.57	q13	protein_coding	RIMS1	regulating synaptic membrane exocytosis 1 [Source:HGNC Symbol;Acc:17282]
1432	ENSG00000079931	36.1234	0.939256	0.512322	1.83333	0.0667533	0.214951	chr6	132617194	132722684	5293	-	37.08	q23.2	protein_coding	MOXD1	monooxygenase, DBH-like 1 [Source:HGNC Symbol;Acc:21063]
1433	ENSG00000079950	4613.43	-0.228087	0.101843	-2.23959	0.0251178	0.11136	chr6	132767006	132834337	16387	-	37.41	q23.2	protein_coding	STX7	syntaxin 7 [Source:HGNC Symbol;Acc:11442]
1434	ENSG00000079974	573.403	0.0191845	0.16558	0.115862	0.907762	0.960592	chr22	51205929	51222091	5870	-	50.05	q13.33	protein_coding	RABL2B	RAB, member of RAS oncogene family-like 2B [Source:HGNC Symbol;Acc:9800]
1435	ENSG00000079999	7696.82	-0.674826	0.188145	-3.58674	0.000334844	0.00495151	chr19	10596796	10614417	3761	-	54.01	p13.2	protein_coding	KEAP1	kelch-like ECH-associated protein 1 [Source:HGNC Symbol;Acc:23177]
1436	ENSG00000080007	51.3466	0.0332512	0.440551	0.0754764	0.939836	0.97429	chr6	74104471	74127292	2807	+	40.88	q13	protein_coding	DDX43	DEAD (Asp-Glu-Ala-Asp) box polypeptide 43 [Source:HGNC Symbol;Acc:18677]
1437	ENSG00000080031	19.6136	0.444516	0.562851	0.789758	0.429669	0.668944	chr19	55692616	55720874	4344	-	52.63	q13.42	protein_coding	PTPRH	protein tyrosine phosphatase, receptor type, H [Source:HGNC Symbol;Acc:9672]
1438	ENSG00000080166	108.673	-0.207412	0.318619	-0.650971	0.515065	0.734	chr13	95089558	95131936	7047	-	39.91	q32.1	protein_coding	DCT	dopachrome tautomerase [Source:HGNC Symbol;Acc:2709]
1439	ENSG00000080189	1373.39	0.00815677	0.088121	0.0925633	0.92625	0.96847	chr20	44978167	44993043	4106	-	54.08	q13.12	protein_coding	SLC35C2	solute carrier family 35 (GDP-fucose transporter), member C2 [Source:HGNC Symbol;Acc:17117]
1440	ENSG00000080200	5349.91	-0.121727	0.111694	-1.08983	0.275789	0.520912	chr3	97595819	97663810	5003	+	36.83	q11.2	protein_coding	CRYBG3	beta-gamma crystallin domain containing 3 [Source:HGNC Symbol;Acc:34427]
1441	ENSG00000080224	16.774	0.580255	0.46385	1.25095	0.210952	0.445139	chr3	96533425	97471304	6303	+	35.41	q11.2	protein_coding	EPHA6	EPH receptor A6 [Source:HGNC Symbol;Acc:19296]
1442	ENSG00000080293	29.2845	1.04325	0.468916	2.22481	0.0260939	0.114307	chr2	120197419	120282070	2900	-	46.76	q14.2	protein_coding	SCTR	secretin receptor [Source:HGNC Symbol;Acc:10608]
1443	ENSG00000080298	1375.47	-0.532172	0.199677	-2.66516	0.0076951	0.0488451	chr9	3218297	3526004	11037	-	35	p24.2	protein_coding	RFX3	regulatory factor X, 3 (influences HLA class II expression) [Source:HGNC Symbol;Acc:9984]
1444	ENSG00000080345	161252	0.222757	0.220057	1.01227	0.31141	0.559661	chr2	152266397	152364527	18166	+	38.04	q23.3	protein_coding	RIF1	RAP1 interacting factor homolog (yeast) [Source:HGNC Symbol;Acc:23207]
1445	ENSG00000080371	10301.2	-0.148108	0.143822	-1.0298	0.303106	0.550654	chr12	72148654	72184699	6670	+	37.14	q21.1	protein_coding	RAB21	RAB21, member RAS oncogene family [Source:HGNC Symbol;Acc:18263]
1446	ENSG00000080493	1253.24	-0.485431	0.29502	-1.64542	0.0998839	0.278965	chr4	72053003	72437804	8361	+	37.49	q13.3	protein_coding	SLC4A4	solute carrier family 4 (sodium bicarbonate cotransporter), member 4 [Source:HGNC Symbol;Acc:11030]
1447	ENSG00000080503	15273.7	-0.534481	0.185687	-2.8784	0.00399694	0.0303828	chr9	2015342	2193624	7132	+	40.56	p24.3	protein_coding	SMARCA2	SWI/SNF related, matrix associated, actin dependent regulator of chromatin, subfamily a, member 2 [Source:HGNC Symbol;Acc:11098]
1448	ENSG00000080546	10992.5	-0.68817	0.1681	-4.09382	4.24e-05	0.00102115	chr6	109307640	109416022	5121	-	37.66	q21	protein_coding	SESN1	sestrin 1 [Source:HGNC Symbol;Acc:21595]
1449	ENSG00000080561	1559.33	-0.50204	0.174866	-2.871	0.00409174	0.0309132	chrX	107068985	107170423	3097	+	40.11	q22.3	protein_coding	MID2	midline 2 [Source:HGNC Symbol;Acc:7096]
1450	ENSG00000080573	3308.73	0.330072	0.192447	1.71514	0.0863202	0.254086	chr19	10070237	10121147	6750	-	52.34	p13.2	protein_coding	COL5A3	collagen, type V, alpha 3 [Source:HGNC Symbol;Acc:14864]
1451	ENSG00000080603	6972.65	-0.266833	0.129318	-2.06339	0.0390756	0.150892	chr16	30709530	30755602	12746	+	49.66	p11.2	protein_coding	SRCAP	Snf2-related CREBBP activator protein [Source:HGNC Symbol;Acc:16974]
1452	ENSG00000080608	1600.36	0.0744353	0.137146	0.542745	0.587305	0.783437	chr9	2720469	2844241	2707	-	39.61	p24.2	protein_coding	KIAA0020	KIAA0020 [Source:HGNC Symbol;Acc:29676]
1453	ENSG00000080618	16.4602	0.715518	0.391692	1.82674	0.0677394	0.217116	chr13	46627321	46679211	1767	-	39	q14.13	protein_coding	CPB2	carboxypeptidase B2 (plasma) [Source:HGNC Symbol;Acc:2300]
1454	ENSG00000080644	66.4522	-0.508417	0.52104	-0.975775	0.329176	0.577346	chr15	78885394	78913637	4765	-	47.02	q25.1	protein_coding	CHRNA3	cholinergic receptor, nicotinic, alpha 3 (neuronal) [Source:HGNC Symbol;Acc:1957]
1455	ENSG00000080709	268.257	-1.17079	0.384716	-3.04325	0.00234039	0.0205924	chr5	113696642	113832337	3995	+	38.35	q22.3	protein_coding	KCNN2	potassium intermediate/small conductance calcium-activated channel, subfamily N, member 2 [Source:HGNC Symbol;Acc:6291]
1456	ENSG00000080802	4364.4	-0.524505	0.152571	-3.43777	0.000586522	0.00760702	chr7	135046547	135194875	6999	-	37.19	q33	protein_coding	CNOT4	CCR4-NOT transcription complex, subunit 4 [Source:HGNC Symbol;Acc:7880]
1457	ENSG00000080815	2926.54	0.0246684	0.0753171	0.327528	0.743269	0.878992	chr14	73603126	73690399	9947	+	42.73	q24.2	protein_coding	PSEN1	presenilin 1 [Source:HGNC Symbol;Acc:9508]
1458	ENSG00000080819	1403.34	-0.21969	0.155423	-1.4135	0.157509	0.372454	chr3	98239976	98312567	3666	-	38.07	q12.1	protein_coding	CPOX	coproporphyrinogen oxidase [Source:HGNC Symbol;Acc:2321]
1459	ENSG00000080822	2464.95	-0.450761	0.132349	-3.40584	0.000659606	0.00827163	chr3	98216756	98241910	5217	-	38.91	q11.2	protein_coding	CLDND1	claudin domain containing 1 [Source:HGNC Symbol;Acc:1322]
1460	ENSG00000080823	427.997	-0.0277188	0.196399	-0.141135	0.887763	0.951954	chr14	102690837	102771537	10996	-	46.51	q32.31	protein_coding	MOK	MOK protein kinase [Source:HGNC Symbol;Acc:9833]
1461	ENSG00000080824	29877.5	-0.0393718	0.225724	-0.174424	0.861532	0.939421	chr14	102547075	102606036	5248	-	47.25	q32.31	protein_coding	HSP90AA1	heat shock protein 90kDa alpha (cytosolic), class A member 1 [Source:HGNC Symbol;Acc:5253]
1462	ENSG00000080839	2265.75	-0.460356	0.189144	-2.43389	0.0149374	0.0781834	chr20	35624752	35724398	5954	-	43.07	q11.23	protein_coding	RBL1	retinoblastoma-like 1 (p107) [Source:HGNC Symbol;Acc:9893]
1463	ENSG00000080845	4995.45	-0.743787	0.255401	-2.91224	0.00358849	0.0281606	chr20	34894258	35157040	8789	+	50.94	q11.23	protein_coding	DLGAP4	discs, large (Drosophila) homolog-associated protein 4 [Source:HGNC Symbol;Acc:24476]
1464	ENSG00000080854	860.478	-1.23603	0.207532	-5.95587	2.59e-09	3.06e-07	chr11	133778459	133826880	8781	-	56.66	q25	protein_coding	IGSF9B	immunoglobulin superfamily, member 9B [Source:HGNC Symbol;Acc:32326]
1465	ENSG00000080947	1022.15	-0.118254	0.131929	-0.89634	0.370071	0.61598	chr1	16793931	16825752	6813	-	51.27	p36.13	pseudogene	CROCCP3	ciliary rootlet coiled-coil, rootletin pseudogene 3 [Source:HGNC Symbol;Acc:29405]
1466	ENSG00000080986	33.6387	0.494367	0.321702	1.53673	0.12436	0.320306	chr18	2571510	2616634	3600	+	36.36	p11.32	protein_coding	NDC80	NDC80 kinetochore complex component [Source:HGNC Symbol;Acc:16909]
1467	ENSG00000081014	3212.48	-0.251318	0.0956114	-2.62853	0.0085754	0.0526225	chr15	51200869	51298097	7359	+	37.92	q21.2	protein_coding	AP4E1	adaptor-related protein complex 4, epsilon 1 subunit [Source:HGNC Symbol;Acc:573]
1468	ENSG00000081019	2378.09	-0.186186	0.102655	-1.81372	0.0697215	0.221535	chr1	114304454	114355098	6819	-	37.22	p13.2	protein_coding	RSBN1	round spermatid basic protein 1 [Source:HGNC Symbol;Acc:25642]
1469	ENSG00000081026	1558.54	0.364011	0.179175	2.0316	0.0421942	0.159243	chr1	113933371	114228545	8180	+	37.11	p13.2	protein_coding	MAGI3	membrane associated guanylate kinase, WW and PDZ domain containing 3 [Source:HGNC Symbol;Acc:29647]
1470	ENSG00000081041	163.484	-0.291969	0.34465	-0.847146	0.396914	0.640072	chr4	74962752	74965010	1500	-	48.16	q13.3	protein_coding	CXCL2	chemokine (C-X-C motif) ligand 2 [Source:HGNC Symbol;Acc:4603]
1471	ENSG00000081051	5.84912	-3.07268	1.29736	-2.36841	0.0178646	0.0881914	chr4	74296855	74321891	3259	+	34.51	q13.3	protein_coding	AFP	alpha-fetoprotein [Source:HGNC Symbol;Acc:317]
1472	ENSG00000081052	7473.43	0.153354	0.25991	0.590028	0.555172	0.763211	chr2	227867427	228028829	9895	-	40.93	q36.3	protein_coding	COL4A4	collagen, type IV, alpha 4 [Source:HGNC Symbol;Acc:2206]
1473	ENSG00000081059	1656.22	-0.13174	0.135698	-0.970831	0.331633	0.57993	chr5	133450402	133487556	10063	+	54.54	q31.1	protein_coding	TCF7	transcription factor 7 (T-cell specific, HMG-box) [Source:HGNC Symbol;Acc:11639]
1474	ENSG00000081087	1659.88	0.118348	0.195902	0.604119	0.545765	0.756526	chr6	108362613	108487058	5325	-	42.48	q21	protein_coding	OSTM1	osteopetrosis associated transmembrane protein 1 [Source:HGNC Symbol;Acc:21652]
1475	ENSG00000081138	5.80283	-2.97213	0.897161	-3.31282	0.000923608	0.0104825	chr18	63417488	63548638	5593	+	35.45	q22.1	protein_coding	CDH7	cadherin 7, type 2 [Source:HGNC Symbol;Acc:1766]
1476	ENSG00000081148	179.849	0.535731	0.284194	1.88509	0.0594183	0.19955	chr3	100941390	101039404	8337	-	37.6	q12.3	protein_coding	IMPG2	interphotoreceptor matrix proteoglycan 2 [Source:HGNC Symbol;Acc:18362]
1477	ENSG00000081154	5334.76	-0.291086	0.104994	-2.7724	0.00556439	0.0386031	chr3	101292939	101313281	3102	+	39.82	q12.3	protein_coding	PCNP	PEST proteolytic signal containing nuclear protein [Source:HGNC Symbol;Acc:30023]
1478	ENSG00000081177	1483.85	-0.457338	0.126521	-3.61472	0.000300667	0.00457976	chr14	69658228	69709075	4601	+	41.44	q24.1	protein_coding	EXD2	exonuclease 3'-5' domain containing 2 [Source:HGNC Symbol;Acc:20217]
1479	ENSG00000081181	2629.43	-0.753459	0.17899	-4.2095	2.56e-05	0.000689741	chr14	68086515	68118437	2418	+	42.2	q24.1	protein_coding	ARG2	arginase 2 [Source:HGNC Symbol;Acc:664]
1480	ENSG00000081189	75582.2	0.555675	0.226543	2.45285	0.0141731	0.0753648	chr5	88013975	88199922	9053	-	36.04	q14.3	protein_coding	MEF2C	myocyte enhancer factor 2C [Source:HGNC Symbol;Acc:6996]
1481	ENSG00000081237	981.334	0.445877	0.247697	1.80009	0.0718466	0.225795	chr1	198607801	198726545	8507	+	34.25	q31.3	protein_coding	PTPRC	protein tyrosine phosphatase, receptor type, C [Source:HGNC Symbol;Acc:9666]
1482	ENSG00000081248	66874	-0.458481	0.229834	-1.99484	0.0460608	0.168755	chr1	201008642	201081694	6166	-	51.6	q32.1	protein_coding	CACNA1S	calcium channel, voltage-dependent, L type, alpha 1S subunit [Source:HGNC Symbol;Acc:1397]
1483	ENSG00000081277	308.059	0.302855	0.502027	0.603265	0.546333	0.756803	chr1	201252580	201302121	6211	+	52.24	q32.1	protein_coding	PKP1	plakophilin 1 (ectodermal dysplasia/skin fragility syndrome) [Source:HGNC Symbol;Acc:9023]
1484	ENSG00000081307	3127.68	-0.0869807	0.0901435	-0.964913	0.334588	0.582729	chr3	132373290	132396941	6827	+	36.76	q22.1	protein_coding	UBA5	ubiquitin-like modifier activating enzyme 5 [Source:HGNC Symbol;Acc:23230]
1485	ENSG00000081320	1203.72	1.22665	0.237023	5.17525	2.28e-07	1.53e-05	chr2	196998290	197041227	6580	-	37.67	q32.3	protein_coding	STK17B	serine/threonine kinase 17b [Source:HGNC Symbol;Acc:11396]
1486	ENSG00000081377	1217.16	0.920295	0.227031	4.0536	5.04e-05	0.0011654	chr9	99252523	99382112	10457	-	42.84	q22.33	protein_coding	CDC14B	cell division cycle 14B [Source:HGNC Symbol;Acc:1719]
1487	ENSG00000081386	2318.35	0.0113141	0.0968384	0.116835	0.906991	0.960124	chr9	99518147	99540411	5921	-	38.98	q22.33	protein_coding	ZNF510	zinc finger protein 510 [Source:HGNC Symbol;Acc:29161]
1488	ENSG00000081665	2336.98	0.0889238	0.128403	0.692534	0.488602	0.715579	chr19	19896648	19932560	8414	-	40.49	p13.11	protein_coding	ZNF506	zinc finger protein 506 [Source:HGNC Symbol;Acc:23780]
1489	ENSG00000081692	1518.59	0.359751	0.106652	3.37313	0.000743194	0.00903637	chr1	227918126	227923112	4315	-	61.26	q42.13	protein_coding	JMJD4	jumonji domain containing 4 [Source:HGNC Symbol;Acc:25724]
1490	ENSG00000081721	432.415	-0.0270678	0.11372	-0.238022	0.811864	0.915478	chr1	161719548	161727028	1762	+	39.87	q23.3	protein_coding	DUSP12	dual specificity phosphatase 12 [Source:HGNC Symbol;Acc:3067]
1491	ENSG00000081760	626.728	-0.284469	0.248652	-1.14405	0.252605	0.494866	chr12	125549925	125627873	16089	+	51.22	q24.31	protein_coding	AACS	acetoacetyl-CoA synthetase [Source:HGNC Symbol;Acc:21298]
1492	ENSG00000081791	4622.16	-0.00500148	0.120442	-0.0415259	0.966877	0.98557	chr5	141303373	141321612	6047	+	48.2	q31.3	protein_coding	KIAA0141	KIAA0141 [Source:HGNC Symbol;Acc:28969]
1493	ENSG00000081803	775.111	0.260232	0.265024	0.98192	0.326139	0.574366	chr7	121958481	122526813	6364	-	36.55	q31.32	protein_coding	CADPS2	Ca++-dependent secretion activator 2 [Source:HGNC Symbol;Acc:16018]
1494	ENSG00000081818	289.412	0.721304	0.133437	5.40556	6.46e-08	5.21e-06	chr5	140501581	140505201	3621	+	45.79	q31.3	protein_coding	PCDHB4	protocadherin beta 4 [Source:HGNC Symbol;Acc:8689]
1495	ENSG00000081842	82.8935	0.880458	0.297303	2.96149	0.00306158	0.0251828	chr5	140207563	140391929	5374	+	40.2	q31.3	protein_coding	PCDHA6	protocadherin alpha 6 [Source:HGNC Symbol;Acc:8672]
1496	ENSG00000081853	1611.77	0.379441	0.131951	2.87561	0.00403241	0.0305814	chr5	140718539	140892546	4653	+	45.17	q31.3	protein_coding	PCDHGA2	protocadherin gamma subfamily A, 2 [Source:HGNC Symbol;Acc:8700]
1497	ENSG00000081870	435.888	0.331726	0.139942	2.37046	0.017766	0.087892	chr1	54382247	54411602	3236	-	40.17	p32.3	protein_coding	HSPB11	heat shock protein family B (small), member 11 [Source:HGNC Symbol;Acc:25019]
1498	ENSG00000081913	1044.39	-0.533263	0.192676	-2.76766	0.00564602	0.0389964	chr18	60382672	60647666	9153	+	39.47	q21.33	protein_coding	PHLPP1	PH domain and leucine rich repeat protein phosphatase 1 [Source:HGNC Symbol;Acc:20610]
1499	ENSG00000081923	1285.25	0.159683	0.110779	1.44146	0.149456	0.360377	chr18	55313658	55470333	6652	-	42.99	q21.31	protein_coding	ATP8B1	ATPase, aminophospholipid transporter, class I, type 8B, member 1 [Source:HGNC Symbol;Acc:3706]
1500	ENSG00000081985	1406.95	0.426879	0.30321	1.40786	0.159171	0.374978	chr1	67773047	67862583	4233	+	41.65	p31.3	protein_coding	IL12RB2	interleukin 12 receptor, beta 2 [Source:HGNC Symbol;Acc:5972]
1501	ENSG00000082014	8562.86	0.201907	0.106477	1.89624	0.057928	0.196431	chr7	150935850	150974982	5198	-	56.14	q36.1	protein_coding	SMARCD3	SWI/SNF related, matrix associated, actin dependent regulator of chromatin, subfamily d, member 3 [Source:HGNC Symbol;Acc:11108]
1502	ENSG00000082068	2548.24	0.0367929	0.0857016	0.429314	0.667694	0.834377	chr5	37379314	37753537	7039	+	39	p13.2	protein_coding	WDR70	WD repeat domain 70 [Source:HGNC Symbol;Acc:25495]
1503	ENSG00000082074	355.072	0.43115	0.349674	1.23301	0.217573	0.453185	chr5	39105338	39274630	6100	-	37.97	p13.1	protein_coding	FYB	FYN binding protein [Source:HGNC Symbol;Acc:4036]
1504	ENSG00000082126	66.9159	-0.09489	0.221604	-0.428196	0.668508	0.834918	chr2	202509593	202563417	4978	-	41.38	q33.1	protein_coding	MPP4	membrane protein, palmitoylated 4 (MAGUK p55 subfamily member 4) [Source:HGNC Symbol;Acc:13680]
1505	ENSG00000082146	6839.85	-0.450136	0.213792	-2.10548	0.0352493	0.140702	chr2	202252581	202345569	3242	+	38.23	q33.1	protein_coding	STRADB	STE20-related kinase adaptor beta [Source:HGNC Symbol;Acc:13205]
1506	ENSG00000082153	6007.9	0.409888	0.165071	2.4831	0.0130244	0.0709342	chr2	201675317	201688569	4593	+	41.96	q33.1	protein_coding	BZW1	basic leucine zipper and W2 domains 1 [Source:HGNC Symbol;Acc:18380]
1507	ENSG00000082175	503.105	-0.154647	0.270044	-0.572673	0.566866	0.7706	chr11	100900355	101001255	15305	-	37.73	q22.1	protein_coding	PGR	progesterone receptor [Source:HGNC Symbol;Acc:8910]
1508	ENSG00000082196	523.793	0.832189	0.329837	2.52303	0.0116349	0.0654984	chr5	34019553	34043937	3576	-	40.08	p13.2	protein_coding	C1QTNF3	C1q and tumor necrosis factor related protein 3 [Source:HGNC Symbol;Acc:14326]
1509	ENSG00000082212	3933.75	0.522813	0.273806	1.90943	0.0562071	0.192647	chr18	48405419	48474691	3427	+	38.58	q21.2	protein_coding	ME2	malic enzyme 2, NAD(+)-dependent, mitochondrial [Source:HGNC Symbol;Acc:6984]
1510	ENSG00000082213	2491.61	-0.208046	0.105166	-1.97826	0.0478991	0.173367	chr5	31532373	31555165	4172	+	39.88	p13.3	protein_coding	C5orf22	chromosome 5 open reading frame 22 [Source:HGNC Symbol;Acc:25639]
1511	ENSG00000082258	4444.98	0.273774	0.0892562	3.06728	0.00216014	0.0194051	chr2	135675805	135716912	9081	+	37.48	q21.3	protein_coding	CCNT2	cyclin T2 [Source:HGNC Symbol;Acc:1600]
1512	ENSG00000082269	1816.83	-0.461884	0.127421	-3.62487	0.000289109	0.00445082	chr6	71122644	71270877	10589	+	36.09	q13	protein_coding	FAM135A	family with sequence similarity 135, member A [Source:HGNC Symbol;Acc:21084]
1513	ENSG00000082293	10368	6.95279	0.33058	21.0321	3.34e-98	1.2e-93	chr6	70576463	70919679	8333	+	36.57	q13	protein_coding	COL19A1	collagen, type XIX, alpha 1 [Source:HGNC Symbol;Acc:2196]
1514	ENSG00000082397	2574.87	1.4893	0.302567	4.92222	8.56e-07	4.46e-05	chr18	5392383	5630699	10975	-	39.83	p11.31	protein_coding	EPB41L3	erythrocyte membrane protein band 4.1-like 3 [Source:HGNC Symbol;Acc:3380]
1515	ENSG00000082438	2450.89	0.990758	0.135562	7.30854	2.7e-13	8.38e-11	chr2	165510134	165700189	17176	-	36.27	q24.3	protein_coding	COBLL1	cordon-bleu WH2 repeat protein-like 1 [Source:HGNC Symbol;Acc:23571]
1516	ENSG00000082458	322.151	0.109271	0.146114	0.747847	0.454553	0.687908	chrX	69664711	69725337	7841	+	46.89	q13.1	protein_coding	DLG3	discs, large homolog 3 (Drosophila) [Source:HGNC Symbol;Acc:2902]
1517	ENSG00000082482	172.537	-1.34828	0.351519	-3.83558	0.000125266	0.0023598	chr1	215179118	215410436	3910	+	36.37	q41	protein_coding	KCNK2	potassium channel, subfamily K, member 2 [Source:HGNC Symbol;Acc:6277]
1518	ENSG00000082497	251.352	0.662072	0.348494	1.89981	0.057458	0.195494	chr1	210406144	210419976	5467	+	43.15	q32.2	protein_coding	SERTAD4	SERTA domain containing 4 [Source:HGNC Symbol;Acc:25236]
1519	ENSG00000082512	712.85	0.517289	0.205122	2.52187	0.0116734	0.0656282	chr1	211499957	211548288	9022	+	44.65	q32.2	protein_coding	TRAF5	TNF receptor-associated factor 5 [Source:HGNC Symbol;Acc:12035]
1520	ENSG00000082515	729.534	-0.0913369	0.143019	-0.638635	0.523061	0.740121	chr5	154320630	154348971	5267	+	38.83	q33.2	protein_coding	MRPL22	mitochondrial ribosomal protein L22 [Source:HGNC Symbol;Acc:14480]
1521	ENSG00000082516	3973.9	-0.0635091	0.0865726	-0.733593	0.463197	0.694964	chr5	154266976	154317769	5637	-	41.33	q33.2	protein_coding	GEMIN5	gem (nuclear organelle) associated protein 5 [Source:HGNC Symbol;Acc:20043]
1522	ENSG00000082556	28.3384	2.40571	1.23239	1.95206	0.0509308	0.180745	chr8	54138284	54164257	5730	-	42.12	q11.23	protein_coding	OPRK1	opioid receptor, kappa 1 [Source:HGNC Symbol;Acc:8154]
1523	ENSG00000082641	117028	-0.426408	0.192189	-2.2187	0.0265073	0.115501	chr17	46125691	46138849	5825	+	54.35	q21.32	protein_coding	NFE2L1	nuclear factor, erythroid 2-like 1 [Source:HGNC Symbol;Acc:7781]
1524	ENSG00000082684	126.668	0.249605	0.315944	0.790028	0.429512	0.668774	chr3	122628041	122747452	6223	-	50.16	q21.1	protein_coding	SEMA5B	sema domain, seven thrombospondin repeats (type 1 and type 1-like), transmembrane domain (TM) and short cytoplasmic domain, (semaphorin) 5B [Source:HGNC Symbol;Acc:10737]
1525	ENSG00000082701	6561.6	0.00764913	0.13228	0.0578252	0.953888	0.979898	chr3	119540170	119813264	8006	-	37.15	q13.33	protein_coding	GSK3B	glycogen synthase kinase 3 beta [Source:HGNC Symbol;Acc:4617]
1526	ENSG00000082781	2983	-0.0551824	0.170709	-0.323253	0.746503	0.88084	chr3	124480795	124620265	6447	-	46.61	q21.2	protein_coding	ITGB5	integrin, beta 5 [Source:HGNC Symbol;Acc:6160]
1527	ENSG00000082805	4545.12	-0.029278	0.105374	-0.277849	0.781129	0.899157	chr12	1099675	1605099	13484	+	39.35	p13.33	protein_coding	ERC1	ELKS/RAB6-interacting/CAST family member 1 [Source:HGNC Symbol;Acc:17072]
1528	ENSG00000082898	14117.7	0.131337	0.131161	1.00134	0.316661	0.56418	chr2	61704984	61765761	11708	-	40.9	p15	protein_coding	XPO1	exportin 1 (CRM1 homolog, yeast) [Source:HGNC Symbol;Acc:12825]
1529	ENSG00000082929	17.8905	0.458987	0.427516	1.07361	0.282996	0.528311	chr4	5526296	5529528	1164	+	45.25	p16.2	protein_coding	C4orf6	chromosome 4 open reading frame 6 [Source:HGNC Symbol;Acc:13716]
1530	ENSG00000082996	4163.53	-0.172131	0.104419	-1.64847	0.0992567	0.277839	chr3	149530495	149679926	3635	+	36.39	q25.1	protein_coding	RNF13	ring finger protein 13 [Source:HGNC Symbol;Acc:10057]
1531	ENSG00000083067	394.22	-0.324804	0.180153	-1.80293	0.0713995	0.224946	chr9	73143979	74061820	19912	-	38.04	q21.13	protein_coding	TRPM3	transient receptor potential cation channel, subfamily M, member 3 [Source:HGNC Symbol;Acc:17992]
1532	ENSG00000083093	853.769	-0.0149818	0.117865	-0.127111	0.898853	0.956405	chr16	23614488	23652631	4740	-	43.54	p12.2	protein_coding	PALB2	partner and localizer of BRCA2 [Source:HGNC Symbol;Acc:26144]
1533	ENSG00000083097	6218.72	0.206289	0.124982	1.65055	0.0988312	0.276878	chr6	83777385	83881069	10613	+	35.96	q14.1	protein_coding	DOPEY1	dopey family member 1 [Source:HGNC Symbol;Acc:21194]
1534	ENSG00000083099	3724.13	-0.175707	0.126705	-1.38674	0.165522	0.384178	chr6	90277863	90348472	8679	-	44.37	q15	protein_coding	LYRM2	LYR motif containing 2 [Source:HGNC Symbol;Acc:25229]
1535	ENSG00000083123	1094.13	-0.180759	0.243962	-0.74093	0.458736	0.691094	chr6	80816364	81055987	4102	+	36.82	q14.1	protein_coding	BCKDHB	branched chain keto acid dehydrogenase E1, beta polypeptide [Source:HGNC Symbol;Acc:987]
1536	ENSG00000083168	7282.47	-0.243477	0.102604	-2.37297	0.0176456	0.0875176	chr8	41786997	41909508	11852	-	38.89	p11.21	protein_coding	KAT6A	K(lysine) acetyltransferase 6A [Source:HGNC Symbol;Acc:13013]
1537	ENSG00000083223	3672.14	-0.137844	0.10534	-1.30857	0.190681	0.418695	chr9	88902648	88969369	6707	-	37.99	q21.33	protein_coding	ZCCHC6	zinc finger, CCHC domain containing 6 [Source:HGNC Symbol;Acc:25817]
1538	ENSG00000083290	2907.03	-0.0558777	0.22937	-0.243614	0.80753	0.91288	chr17	19674142	19771249	9843	-	41.45	p11.2	protein_coding	ULK2	unc-51 like autophagy activating kinase 2 [Source:HGNC Symbol;Acc:13480]
1539	ENSG00000083307	29.8822	0.0313997	0.467745	0.0671301	0.946478	0.977157	chr8	102504660	102681954	6060	+	40.92	q22.3	protein_coding	GRHL2	grainyhead-like 2 (Drosophila) [Source:HGNC Symbol;Acc:2799]
1540	ENSG00000083312	15101.1	0.121615	0.12654	0.96108	0.336512	0.584401	chr5	72112139	72212560	11977	+	37.25	q13.2	protein_coding	TNPO1	transportin 1 [Source:HGNC Symbol;Acc:6401]
1541	ENSG00000083444	3715.51	-0.230678	0.250245	-0.921809	0.356628	0.603375	chr1	11994262	12035595	5320	+	53.54	p36.22	protein_coding	PLOD1	procollagen-lysine, 2-oxoglutarate 5-dioxygenase 1 [Source:HGNC Symbol;Acc:9081]
1542	ENSG00000083454	1588.03	0.677989	0.20762	3.26553	0.00109259	0.0118942	chr17	3575493	3599698	4190	-	57.94	p13.2	protein_coding	P2RX5	purinergic receptor P2X, ligand-gated ion channel, 5 [Source:HGNC Symbol;Acc:8536]
1543	ENSG00000083457	895.255	0.0217442	0.22943	0.0947747	0.924494	0.967803	chr17	3617922	3704537	6657	-	50.88	p13.2	protein_coding	ITGAE	integrin, alpha E (antigen CD103, human mucosal lymphocyte antigen 1; alpha polypeptide) [Source:HGNC Symbol;Acc:6147]
1544	ENSG00000083520	2928.5	-0.0414079	0.124452	-0.332722	0.739344	0.876792	chr13	73329540	73356234	7602	-	36.24	q22.1	protein_coding	DIS3	DIS3 mitotic control homolog (S. cerevisiae) [Source:HGNC Symbol;Acc:20604]
1545	ENSG00000083535	1588.98	-0.0635142	0.103897	-0.61132	0.540988	0.753179	chr13	73356197	73590591	3669	+	37	q22.1	protein_coding	PIBF1	progesterone immunomodulatory binding factor 1 [Source:HGNC Symbol;Acc:23352]
1546	ENSG00000083544	3662.99	-0.0569341	0.106128	-0.536467	0.591636	0.786763	chr13	60970591	61148012	4112	+	36.41	q21.2	protein_coding	TDRD3	tudor domain containing 3 [Source:HGNC Symbol;Acc:20612]
1547	ENSG00000083635	630.566	0.0999122	0.119513	0.835992	0.403159	0.646027	chr13	45513384	45563618	3492	-	38.71	q14.12	protein_coding	NUFIP1	nuclear fragile X mental retardation protein interacting protein 1 [Source:HGNC Symbol;Acc:8057]
1548	ENSG00000083642	4465.8	0.136316	0.0963367	1.415	0.157069	0.371717	chr13	33160564	33352157	13212	+	36.62	q13.1	protein_coding	PDS5B	PDS5, regulator of cohesion maintenance, homolog B (S. cerevisiae) [Source:HGNC Symbol;Acc:20418]
1549	ENSG00000083720	2704.43	0.27376	0.352369	0.776913	0.43721	0.674787	chr5	41730167	41870621	4194	-	37.48	p13.1	protein_coding	OXCT1	3-oxoacid CoA transferase 1 [Source:HGNC Symbol;Acc:8527]
1550	ENSG00000083750	1140.94	0.206126	0.114471	1.80068	0.0717526	0.225637	chrX	55744172	55785207	2725	+	40.87	p11.21	protein_coding	RRAGB	Ras-related GTP binding B [Source:HGNC Symbol;Acc:19901]
1551	ENSG00000083799	10368.7	0.911456	0.222389	4.09847	4.16e-05	0.00100489	chr16	50775961	50835846	12963	+	36.42	q12.1	protein_coding	CYLD	cylindromatosis (turban tumor syndrome) [Source:HGNC Symbol;Acc:2584]
1552	ENSG00000083807	493.009	0.0409083	0.112535	0.363518	0.716218	0.863912	chr19	58990879	59023780	8025	-	51.36	q13.43	protein_coding	SLC27A5	solute carrier family 27 (fatty acid transporter), member 5 [Source:HGNC Symbol;Acc:10999]
1553	ENSG00000083812	677.788	0.200579	0.0949259	2.11301	0.0345999	0.138795	chr19	58978423	58984945	3795	+	59.31	q13.43	protein_coding	ZNF324	zinc finger protein 324 [Source:HGNC Symbol;Acc:14096]
1554	ENSG00000083814	1075.95	-0.677226	0.203865	-3.32194	0.000893942	0.0102313	chr19	58231119	58238992	3532	-	49.44	q13.43	protein_coding	ZNF671	zinc finger protein 671 [Source:HGNC Symbol;Acc:26279]
1555	ENSG00000083817	359.564	0.139753	0.188439	0.741632	0.45831	0.690771	chr19	58082934	58090295	2561	-	48.61	q13.43	protein_coding	ZNF416	zinc finger protein 416 [Source:HGNC Symbol;Acc:20645]
1556	ENSG00000083828	1649.64	-0.102792	0.129477	-0.793902	0.427253	0.666596	chr19	58281023	58331307	3261	+	46.13	q13.43	protein_coding	ZNF586	zinc finger protein 586 [Source:HGNC Symbol;Acc:25949]
1557	ENSG00000083838	789.935	0.192989	0.121146	1.59303	0.111153	0.298059	chr19	58985384	58992597	4923	+	59.14	q13.43	protein_coding	ZNF446	zinc finger protein 446 [Source:HGNC Symbol;Acc:21036]
1558	ENSG00000083842	347.106	0.704256	0.238053	2.95839	0.00309246	0.0253498	chr19	58790317	58807254	2211	+	48.71	q13.43	protein_coding	ZNF8	Zinc finger protein 8 [Source:UniProtKB/Swiss-Prot;Acc:P17098]
1559	ENSG00000083844	2085.51	0.326804	0.0914733	3.57267	0.000353356	0.00517001	chr19	57702868	57724724	3042	+	46.53	q13.43	protein_coding	ZNF264	zinc finger protein 264 [Source:HGNC Symbol;Acc:13057]
1560	ENSG00000083845	15716.9	-0.0584097	0.114515	-0.510061	0.610009	0.798047	chr19	58897767	58906173	3617	+	51.15	q13.43	protein_coding	RPS5	ribosomal protein S5 [Source:HGNC Symbol;Acc:10426]
1561	ENSG00000083857	4509.37	0.817023	0.326577	2.50177	0.0123573	0.0683565	chr4	187508937	187647876	16168	-	41.53	q35.2	protein_coding	FAT1	FAT atypical cadherin 1 [Source:HGNC Symbol;Acc:3595]
1562	ENSG00000083896	4711.59	0.00692379	0.099005	0.0699338	0.944246	0.97615	chr4	69176105	69215807	7032	-	35.4	q13.2	protein_coding	YTHDC1	YTH domain containing 1 [Source:HGNC Symbol;Acc:30626]
1563	ENSG00000083937	2554.93	-0.29693	0.0970345	-3.06004	0.00221306	0.0197638	chr3	87276421	87304698	3106	+	34.78	p11.2	protein_coding	CHMP2B	charged multivesicular body protein 2B [Source:HGNC Symbol;Acc:24537]
1564	ENSG00000084072	1765.63	-0.0555151	0.142171	-0.390481	0.696181	0.852003	chr1	40157854	40229586	8071	+	45.04	p34.2	protein_coding	PPIE	peptidylprolyl isomerase E (cyclophilin E) [Source:HGNC Symbol;Acc:9258]
1565	ENSG00000084073	1864.79	-0.118929	0.158016	-0.752638	0.451667	0.686006	chr1	40723779	40759856	3572	+	40.78	p34.2	protein_coding	ZMPSTE24	zinc metallopeptidase STE24 [Source:HGNC Symbol;Acc:12877]
1566	ENSG00000084090	27484.5	-0.101014	0.134192	-0.752754	0.451598	0.686006	chr2	96850597	96874563	4414	-	42.97	q11.2	protein_coding	STARD7	StAR-related lipid transfer (START) domain containing 7 [Source:HGNC Symbol;Acc:18063]
1567	ENSG00000084092	1607.44	-0.0615768	0.113757	-0.541299	0.588301	0.7843	chr4	57829536	57844989	3415	-	45.66	q12	protein_coding	NOA1	nitric oxide associated 1 [Source:HGNC Symbol;Acc:28473]
1568	ENSG00000084093	4995.17	0.0734412	0.164229	0.447188	0.654739	0.826309	chr4	57774075	57802010	7875	+	42.81	q12	protein_coding	REST	RE1-silencing transcription factor [Source:HGNC Symbol;Acc:9966]
1569	ENSG00000084110	23.2684	-0.821528	0.397515	-2.06666	0.0387662	0.150172	chr12	96366440	96390143	5146	-	43.36	q23.1	protein_coding	HAL	histidine ammonia-lyase [Source:HGNC Symbol;Acc:4806]
1570	ENSG00000084112	5324.47	-0.00521409	0.188215	-0.0277028	0.977899	0.989845	chr12	109176466	109251366	10039	-	48.53	q24.11	protein_coding	SSH1	slingshot protein phosphatase 1 [Source:HGNC Symbol;Acc:30579]
1571	ENSG00000084207	5342.64	-0.315506	0.141143	-2.23537	0.0253933	0.112195	chr11	67351066	67354131	1925	+	63.05	q13.2	protein_coding	GSTP1	glutathione S-transferase pi 1 [Source:HGNC Symbol;Acc:4638]
1572	ENSG00000084234	5994.82	-0.00150992	0.113228	-0.0133353	0.98936	0.99492	chr11	129939732	130014699	7444	+	43.6	q24.3	protein_coding	APLP2	amyloid beta (A4) precursor-like protein 2 [Source:HGNC Symbol;Acc:598]
1573	ENSG00000084444	349.007	-0.236365	0.168061	-1.40642	0.159599	0.375616	chr12	13197218	13295455	6807	+	43.23	p13.1	protein_coding	KIAA1467	KIAA1467 [Source:HGNC Symbol;Acc:29288]
1574	ENSG00000084453	5.33703	-0.901144	0.755952	-1.19206	0.233236	0.471727	chr12	21417534	21572528	11637	-	36.64	p12.1	protein_coding	SLCO1A2	solute carrier organic anion transporter family, member 1A2 [Source:HGNC Symbol;Acc:10956]
1575	ENSG00000084463	3373.45	-0.219026	0.139594	-1.56903	0.116642	0.307416	chr12	14939410	14956474	3418	-	37.58	p12.3	protein_coding	WBP11	WW domain binding protein 11 [Source:HGNC Symbol;Acc:16461]
1576	ENSG00000084623	7184.19	-0.176428	0.0969924	-1.81899	0.0689133	0.219749	chr1	32687529	32697205	1725	+	50.5	p35.1	protein_coding	EIF3I	eukaryotic translation initiation factor 3, subunit I [Source:HGNC Symbol;Acc:3272]
1577	ENSG00000084628	581.025	-0.911118	0.442566	-2.05872	0.0395214	0.152124	chr1	31652592	31712401	2987	-	50.46	p35.2	protein_coding	NKAIN1	Na+/K+ transporting ATPase interacting 1 [Source:HGNC Symbol;Acc:25743]
1578	ENSG00000084636	2916.06	0.166676	0.258506	0.644765	0.51908	0.73662	chr1	32117848	32169920	9365	-	56	p35.2	protein_coding	COL16A1	collagen, type XVI, alpha 1 [Source:HGNC Symbol;Acc:2193]
1579	ENSG00000084652	3715.57	-0.076035	0.0882401	-0.861683	0.388862	0.632967	chr1	32645287	32663886	5103	+	50.3	p35.1	protein_coding	TXLNA	taxilin alpha [Source:HGNC Symbol;Acc:30685]
1580	ENSG00000084674	630.318	0.0330023	0.755618	0.0436759	0.965163	0.984462	chr2	21224301	21266945	14828	-	42.96	p24.1	protein_coding	APOB	apolipoprotein B [Source:HGNC Symbol;Acc:603]
1581	ENSG00000084676	13655.9	0.401542	0.11054	3.63256	0.000280626	0.00435395	chr2	24714783	24993571	8633	+	37.1	p23.3	protein_coding	NCOA1	nuclear receptor coactivator 1 [Source:HGNC Symbol;Acc:7668]
1582	ENSG00000084693	2578.61	0.189022	0.110754	1.70669	0.0878802	0.256949	chr2	27265232	27293490	5283	+	48.47	p23.3	protein_coding	AGBL5	ATP/GTP binding protein-like 5 [Source:HGNC Symbol;Acc:26147]
1583	ENSG00000084710	1141.31	-0.135536	0.33986	-0.3988	0.690041	0.848093	chr2	25264999	25378243	6828	+	48.29	p23.3	protein_coding	EFR3B	EFR3 homolog B (S. cerevisiae) [Source:HGNC Symbol;Acc:29155]
1584	ENSG00000084731	276.926	0.0585348	0.192539	0.304016	0.761116	0.888207	chr2	26149471	26205618	6397	-	48.24	p23.3	protein_coding	KIF3C	kinesin family member 3C [Source:HGNC Symbol;Acc:6321]
1585	ENSG00000084733	15264.7	-0.564354	0.14274	-3.95373	7.69e-05	0.00163442	chr2	26256976	26360323	3631	+	40.62	p23.3	protein_coding	RAB10	RAB10, member RAS oncogene family [Source:HGNC Symbol;Acc:9759]
1586	ENSG00000084734	7.99124	0.595922	0.714592	0.833933	0.404319	0.646946	chr2	27719709	27746554	3149	+	45.33	p23.3	protein_coding	GCKR	glucokinase (hexokinase 4) regulator [Source:HGNC Symbol;Acc:4196]
1587	ENSG00000084754	25688.3	-0.163637	0.172499	-0.948626	0.342811	0.590459	chr2	26413504	26467594	3971	-	41.93	p23.3	protein_coding	HADHA	hydroxyacyl-CoA dehydrogenase/3-ketoacyl-CoA thiolase/enoyl-CoA hydratase (trifunctional protein), alpha subunit [Source:HGNC Symbol;Acc:4801]
1588	ENSG00000084764	2598.94	-0.0811019	0.182972	-0.443247	0.657587	0.82821	chr2	27193480	27250064	3459	+	45.89	p23.3	protein_coding	MAPRE3	microtubule-associated protein, RP/EB family, member 3 [Source:HGNC Symbol;Acc:6892]
1589	ENSG00000084774	1670.7	-0.0259421	0.142503	-0.182045	0.855547	0.936386	chr2	27440258	27466811	8422	+	51.17	p23.3	protein_coding	CAD	carbamoyl-phosphate synthetase 2, aspartate transcarbamylase, and dihydroorotase [Source:HGNC Symbol;Acc:1424]
1590	ENSG00000085063	26601.5	-0.516878	0.134259	-3.84985	0.000118191	0.00226184	chr11	33719807	33757991	4942	-	44.03	p13	protein_coding	CD59	CD59 molecule, complement regulatory protein [Source:HGNC Symbol;Acc:1689]
1591	ENSG00000085117	1961.14	1.8265	0.174188	10.4858	1e-25	2.41e-22	chr11	44585977	44641913	4054	+	53.55	p11.2	protein_coding	CD82	CD82 molecule [Source:HGNC Symbol;Acc:6210]
1592	ENSG00000085185	502.744	-0.405807	0.302503	-1.34149	0.17976	0.403884	chrX	129115083	129192058	7996	+	49.7	q26.1	protein_coding	BCORL1	BCL6 corepressor-like 1 [Source:HGNC Symbol;Acc:25657]
1593	ENSG00000085224	13794.3	-0.0359184	0.140819	-0.255068	0.798671	0.908723	chrX	76760356	77041702	12224	-	37.72	q21.1	protein_coding	ATRX	alpha thalassemia/mental retardation syndrome X-linked [Source:HGNC Symbol;Acc:886]
1594	ENSG00000085231	2842.65	0.000586335	0.114845	0.00510543	0.995926	0.997957	chr5	68646811	68665840	4050	-	41.64	q13.2	protein_coding	TAF9	TAF9 RNA polymerase II, TATA box binding protein (TBP)-associated factor, 32kDa [Source:HGNC Symbol;Acc:11542]
1595	ENSG00000085265	113.839	0.303279	0.456586	0.664231	0.506542	0.727681	chr9	137801431	137809809	1286	-	56.4	q34.3	protein_coding	FCN1	ficolin (collagen/fibrinogen domain containing) 1 [Source:HGNC Symbol;Acc:3623]
1596	ENSG00000085274	2137.92	-0.103364	0.140675	-0.734774	0.462477	0.694248	chr3	169490619	169507504	5730	+	37.29	q26.2	protein_coding	MYNN	myoneurin [Source:HGNC Symbol;Acc:14955]
1597	ENSG00000085276	1676.87	0.113087	0.119891	0.94325	0.345553	0.593355	chr3	168801287	169381406	9103	-	37.45	q26.2	protein_coding	MECOM	MDS1 and EVI1 complex locus [Source:HGNC Symbol;Acc:3498]
1598	ENSG00000085365	3400.96	-0.126982	0.123663	-1.02683	0.3045	0.552182	chr5	77656339	77776562	6842	+	37.59	q14.1	protein_coding	SCAMP1	secretory carrier membrane protein 1 [Source:HGNC Symbol;Acc:10563]
1599	ENSG00000085377	4821.81	-0.76855	0.231321	-3.32244	0.000892339	0.0102216	chr6	105725440	105850959	3762	-	40.95	q21	protein_coding	PREP	prolyl endopeptidase [Source:HGNC Symbol;Acc:9358]
1600	ENSG00000085382	1374.42	0.300022	0.126403	2.37354	0.0176187	0.0874444	chr6	105175968	105307794	9238	-	37.39	q16.3	protein_coding	HACE1	HECT domain and ankyrin repeat containing E3 ubiquitin protein ligase 1 [Source:HGNC Symbol;Acc:21033]
1601	ENSG00000085415	1250.78	-0.126307	0.116707	-1.08226	0.279137	0.524528	chr18	12947132	12987535	10481	+	43.55	p11.21	protein_coding	SEH1L	SEH1-like (S. cerevisiae) [Source:HGNC Symbol;Acc:30379]
1602	ENSG00000085433	3081.03	-0.922138	0.222435	-4.14566	3.39e-05	0.000857296	chr1	109512836	109584850	4536	-	41.23	p13.3	protein_coding	WDR47	WD repeat domain 47 [Source:HGNC Symbol;Acc:29141]
1603	ENSG00000085449	3299.72	-0.147316	0.120958	-1.21791	0.223256	0.459857	chr2	224720433	224810104	5516	-	42.72	q36.1	protein_coding	WDFY1	WD repeat and FYVE domain containing 1 [Source:HGNC Symbol;Acc:20451]
1604	ENSG00000085465	199.74	0.378309	0.202949	1.86406	0.0623138	0.205425	chr1	111956936	111970399	2988	-	45.7	p13.2	protein_coding	OVGP1	oviductal glycoprotein 1, 120kDa [Source:HGNC Symbol;Acc:8524]
1605	ENSG00000085491	1896.92	-0.152885	0.157907	-0.968196	0.332947	0.581324	chr1	108676658	108743471	6548	-	39.44	p13.3	protein_coding	SLC25A24	solute carrier family 25 (mitochondrial carrier; phosphate carrier), member 24 [Source:HGNC Symbol;Acc:20662]
1606	ENSG00000085511	4910.02	0.370925	0.119113	3.11407	0.00184525	0.0173701	chr6	161412759	161538417	7522	+	38.79	q26	protein_coding	MAP3K4	mitogen-activated protein kinase kinase kinase 4 [Source:HGNC Symbol;Acc:6856]
1607	ENSG00000085514	673.06	-0.667403	0.314498	-2.12212	0.0338276	0.136441	chr7	99965153	99997719	2003	+	48.68	q22.1	protein_coding	PILRA	paired immunoglobin-like type 2 receptor alpha [Source:HGNC Symbol;Acc:20396]
1608	ENSG00000085552	7.84302	0.572432	0.529393	1.0813	0.279565	0.524984	chr1	159896829	159915386	6620	-	55.8	q23.2	protein_coding	IGSF9	immunoglobulin superfamily, member 9 [Source:HGNC Symbol;Acc:18132]
1609	ENSG00000085563	118.089	0.182858	0.321157	0.569371	0.569104	0.77198	chr7	87133175	87342611	5552	-	37.05	q21.12	protein_coding	ABCB1	ATP-binding cassette, sub-family B (MDR/TAP), member 1 [Source:HGNC Symbol;Acc:40]
1610	ENSG00000085644	1465.13	-0.547052	0.195812	-2.79376	0.00520996	0.0368404	chr16	3179778	3192806	6443	+	53.47	p13.3	protein_coding	ZNF213	zinc finger protein 213 [Source:HGNC Symbol;Acc:13005]
1611	ENSG00000085662	8496.13	-0.328273	0.156713	-2.09475	0.0361935	0.143226	chr7	134127102	134144036	3660	-	50.04	q33	protein_coding	AKR1B1	aldo-keto reductase family 1, member B1 (aldose reductase) [Source:HGNC Symbol;Acc:381]
1612	ENSG00000085719	4507.52	-0.021798	0.101308	-0.215165	0.829638	0.924396	chr8	87497059	87573726	6792	+	38.39	q21.3	protein_coding	CPNE3	copine III [Source:HGNC Symbol;Acc:2316]
1613	ENSG00000085721	4741.52	0.0573433	0.190524	0.300976	0.763433	0.889094	chr16	15153879	15188174	4156	-	42.09	p13.11	protein_coding	RRN3	RRN3 RNA polymerase I transcription factor homolog (S. cerevisiae) [Source:HGNC Symbol;Acc:30346]
1614	ENSG00000085733	6925.92	0.160431	0.0953103	1.68325	0.0923273	0.264787	chr11	70244510	70282690	6949	+	52.81	q13.3	protein_coding	CTTN	cortactin [Source:HGNC Symbol;Acc:3338]
1615	ENSG00000085741	718.37	0.0199241	0.241947	0.0823492	0.934369	0.971947	chr11	75897369	75921780	2401	-	57.84	q13.5	protein_coding	WNT11	wingless-type MMTV integration site family, member 11 [Source:HGNC Symbol;Acc:12776]
1616	ENSG00000085760	3630.21	-0.392984	0.127626	-3.07918	0.00207575	0.0188399	chr2	55463731	55496483	3371	-	39.6	p16.1	protein_coding	MTIF2	mitochondrial translational initiation factor 2 [Source:HGNC Symbol;Acc:7441]
1617	ENSG00000085788	4298.12	0.0600316	0.114426	0.52463	0.59984	0.791559	chr8	38082736	38133076	10686	+	42.25	p11.23	protein_coding	DDHD2	DDHD domain containing 2 [Source:HGNC Symbol;Acc:29106]
1618	ENSG00000085831	319.506	0.28489	0.214301	1.32939	0.18372	0.409127	chr1	51752930	51810788	9362	-	51.4	p32.3	protein_coding	TTC39A	tetratricopeptide repeat domain 39A [Source:HGNC Symbol;Acc:18657]
1619	ENSG00000085832	12247.6	-0.661604	0.172153	-3.84311	0.000121486	0.00230624	chr1	51819935	51985000	7551	-	38.05	p32.3	protein_coding	EPS15	epidermal growth factor receptor pathway substrate 15 [Source:HGNC Symbol;Acc:3419]
1620	ENSG00000085840	43.7536	0.0862524	0.383659	0.224815	0.822123	0.920383	chr1	52838501	52870131	3157	-	44.76	p32.3	protein_coding	ORC1	origin recognition complex, subunit 1 [Source:HGNC Symbol;Acc:8487]
1621	ENSG00000085871	1750.5	-0.313562	0.152601	-2.05479	0.0398995	0.15314	chr4	140586922	140661899	3182	+	43.46	q31.1	protein_coding	MGST2	microsomal glutathione S-transferase 2 [Source:HGNC Symbol;Acc:7063]
1622	ENSG00000085872	1503.57	-0.222215	0.120379	-1.84596	0.0648984	0.210961	chr19	16628700	16653341	6113	-	57.3	p13.11	protein_coding	CHERP	calcium homeostasis endoplasmic reticulum protein [Source:HGNC Symbol;Acc:16930]
1623	ENSG00000085978	2402.18	-0.299671	0.113365	-2.64341	0.00820754	0.0511149	chr2	234118697	234204320	6047	+	45.33	q37.1	protein_coding	ATG16L1	autophagy related 16-like 1 (S. cerevisiae) [Source:HGNC Symbol;Acc:21498]
1624	ENSG00000085982	5251.59	-0.0479082	0.119151	-0.402081	0.687625	0.84665	chr2	234384166	234475428	9352	-	38.86	q37.1	protein_coding	USP40	ubiquitin specific peptidase 40 [Source:HGNC Symbol;Acc:20069]
1625	ENSG00000085998	5170	0.153209	0.113256	1.35277	0.176129	0.399146	chr1	46654354	46685977	6366	-	49.39	p34.1	protein_coding	POMGNT1	protein O-linked mannose N-acetylglucosaminyltransferase 1 (beta 1,2-) [Source:HGNC Symbol;Acc:19139]
1626	ENSG00000085999	481.149	-0.262623	0.175139	-1.49951	0.133741	0.335452	chr1	46713360	46744145	3212	+	46.5	p34.1	protein_coding	RAD54L	RAD54-like (S. cerevisiae) [Source:HGNC Symbol;Acc:9826]
1627	ENSG00000086015	20719.3	-0.622272	0.149649	-4.15821	3.21e-05	0.000825469	chr1	46252659	46501796	7877	+	41.32	p34.1	protein_coding	MAST2	microtubule associated serine/threonine kinase 2 [Source:HGNC Symbol;Acc:19035]
1628	ENSG00000086061	3773.06	0.0524748	0.220492	0.237989	0.811889	0.915478	chr9	33025209	33039905	2730	+	41.22	p21.1	protein_coding	DNAJA1	DnaJ (Hsp40) homolog, subfamily A, member 1 [Source:HGNC Symbol;Acc:5229]
1629	ENSG00000086062	1991.99	0.141847	0.212717	0.666835	0.504878	0.726609	chr9	33104080	33167354	5065	-	47.1	p21.1	protein_coding	B4GALT1	UDP-Gal:betaGlcNAc beta 1,4- galactosyltransferase, polypeptide 1 [Source:HGNC Symbol;Acc:924]
1630	ENSG00000086065	2299.68	0.198974	0.198791	1.00092	0.316866	0.56445	chr9	33264940	33281977	2237	+	41.53	p13.3	protein_coding	CHMP5	charged multivesicular body protein 5 [Source:HGNC Symbol;Acc:26942]
1631	ENSG00000086102	5988.8	-0.017583	0.107521	-0.163531	0.8701	0.943502	chr9	33290509	33371155	7147	+	42.57	p13.3	protein_coding	NFX1	nuclear transcription factor, X-box binding 1 [Source:HGNC Symbol;Acc:7803]
1632	ENSG00000086189	1301.28	0.295998	0.124296	2.38139	0.0172473	0.0863172	chr5	61683081	61699766	3736	-	39.95	q12.1	protein_coding	DIMT1	DIM1 dimethyladenosine transferase 1 homolog (S. cerevisiae) [Source:HGNC Symbol;Acc:30217]
1633	ENSG00000086200	2776.58	-0.0970636	0.101124	-0.959848	0.337132	0.584912	chr5	61699799	61924409	7540	+	38.3	q12.1	protein_coding	IPO11	importin 11 [Source:HGNC Symbol;Acc:20628]
1634	ENSG00000086205	20.808	0.274109	0.449746	0.609474	0.54221	0.753718	chr11	49168187	49230222	3824	-	35.64	p11.12	protein_coding	FOLH1	folate hydrolase (prostate-specific membrane antigen) 1 [Source:HGNC Symbol;Acc:3788]
1635	ENSG00000086232	5914.18	-0.327091	0.149724	-2.18462	0.0289167	0.12251	chr7	6061881	6098861	5544	-	44.71	p22.1	protein_coding	EIF2AK1	eukaryotic translation initiation factor 2-alpha kinase 1 [Source:HGNC Symbol;Acc:24921]
1636	ENSG00000086288	10.093	0.399904	0.528233	0.75706	0.449014	0.684296	chr7	37888199	37940003	2439	+	37.47	p14.1	protein_coding	NME8	NME/NM23 family member 8 [Source:HGNC Symbol;Acc:16473]
1637	ENSG00000086289	7391.27	-0.103223	0.29195	-0.353564	0.723665	0.867874	chr7	37723446	37991543	2864	+	38.37	p14.1	protein_coding	EPDR1	ependymin related 1 [Source:HGNC Symbol;Acc:17572]
1638	ENSG00000086300	109.105	0.912458	0.224362	4.0669	4.76e-05	0.00111661	chr7	26331541	26413949	3421	+	42.65	p15.2	protein_coding	SNX10	sorting nexin 10 [Source:HGNC Symbol;Acc:14974]
1639	ENSG00000086475	2025.3	-0.233457	0.133688	-1.74628	0.080762	0.243253	chr10	13359424	13390297	3979	-	45.78	p13	protein_coding	SEPHS1	selenophosphate synthetase 1 [Source:HGNC Symbol;Acc:19685]
1640	ENSG00000086504	1803.64	-0.0890254	0.142598	-0.62431	0.532424	0.747063	chr16	417384	420527	2404	-	64.85	p13.3	protein_coding	MRPL28	mitochondrial ribosomal protein L28 [Source:HGNC Symbol;Acc:14484]
1641	ENSG00000086506	4.62805	-0.348254	0.641066	-0.543242	0.586963	0.783271	chr16	230452	231180	536	+	71.88	p13.3	protein_coding	HBQ1	hemoglobin, theta 1 [Source:HGNC Symbol;Acc:4833]
1642	ENSG00000086544	824.746	0.0765813	0.143628	0.533193	0.5939	0.788436	chr19	41223008	41246765	3385	+	51.32	q13.2	protein_coding	ITPKC	inositol-trisphosphate 3-kinase C [Source:HGNC Symbol;Acc:14897]
1643	ENSG00000086570	1244.84	0.776495	0.338005	2.29729	0.0216024	0.100529	chr5	150883654	150948505	14537	-	46.35	q33.1	protein_coding	FAT2	FAT atypical cadherin 2 [Source:HGNC Symbol;Acc:3596]
1644	ENSG00000086589	2359.42	0.0581895	0.117765	0.494114	0.621226	0.805033	chr5	150070356	150080669	3631	-	43.27	q33.1	protein_coding	RBM22	RNA binding motif protein 22 [Source:HGNC Symbol;Acc:25503]
1645	ENSG00000086598	7727.02	-0.265373	0.135294	-1.96146	0.0498255	0.17803	chr12	124069078	124083116	3822	+	42.28	q24.31	protein_coding	TMED2	transmembrane emp24 domain trafficking protein 2 [Source:HGNC Symbol;Acc:16996]
1646	ENSG00000086619	707.502	-0.00996104	0.129538	-0.0768965	0.938706	0.974064	chr1	236378855	236445319	5688	-	37.49	q42.3	protein_coding	ERO1LB	ERO1-like beta (S. cerevisiae) [Source:HGNC Symbol;Acc:14355]
1647	ENSG00000086666	6065.31	0.00238228	0.156694	0.0152034	0.98787	0.994337	chr15	80351910	80430735	5065	+	38.17	q25.1	protein_coding	ZFAND6	zinc finger, AN1-type domain 6 [Source:HGNC Symbol;Acc:30164]
1648	ENSG00000086712	1060.32	0.175598	0.172724	1.01664	0.309324	0.557661	chrX	16804550	16862642	4460	+	42.93	p22.2	protein_coding	TXLNG	taxilin gamma [Source:HGNC Symbol;Acc:18578]
1649	ENSG00000086717	18.3051	0.894419	0.330621	2.70527	0.00682495	0.0447427	chrX	18694029	18846039	3515	+	41.71	p22.13	protein_coding	PPEF1	protein phosphatase, EF-hand calcium binding domain 1 [Source:HGNC Symbol;Acc:9243]
1650	ENSG00000086730	306.382	-0.0721933	0.224678	-0.321319	0.747969	0.881499	chr7	73613982	73644161	4542	+	53.07	q11.23	protein_coding	LAT2	linker for activation of T cells family, member 2 [Source:HGNC Symbol;Acc:12749]
1651	ENSG00000086758	49175.5	0.148565	0.106656	1.39294	0.163639	0.38154	chrX	53559057	53713673	17373	-	41.19	p11.22	protein_coding	HUWE1	HECT, UBA and WWE domain containing 1, E3 ubiquitin protein ligase [Source:HGNC Symbol;Acc:30892]
1652	ENSG00000086827	2187.39	-0.253158	0.117204	-2.15998	0.0307744	0.128089	chr11	113603909	113644533	2992	-	39.15	q23.2	protein_coding	ZW10	zw10 kinetochore protein [Source:HGNC Symbol;Acc:13194]
1653	ENSG00000086848	1711.21	0.00826319	0.0990402	0.0834327	0.933507	0.971595	chr11	111652919	111742305	8014	-	40.69	q23.1	protein_coding	ALG9	ALG9, alpha-1,2-mannosyltransferase [Source:HGNC Symbol;Acc:15672]
1654	ENSG00000086967	122216	-1.7366	0.802671	-2.16353	0.0305004	0.127228	chr19	50936160	50969578	3708	+	53.78	q13.33	protein_coding	MYBPC2	myosin binding protein C, fast type [Source:HGNC Symbol;Acc:7550]
1655	ENSG00000086991	306.981	-0.370324	0.438369	-0.844777	0.398235	0.641348	chr11	89057524	89322779	6327	-	35.71	q14.3	protein_coding	NOX4	NADPH oxidase 4 [Source:HGNC Symbol;Acc:7891]
1656	ENSG00000087008	1194.07	-0.0801967	0.121568	-0.659686	0.509456	0.730094	chr4	8368009	8442450	3846	-	51.93	p16.1	protein_coding	ACOX3	acyl-CoA oxidase 3, pristanoyl [Source:HGNC Symbol;Acc:121]
1657	ENSG00000087053	1490.03	-0.0534102	0.154347	-0.34604	0.729312	0.870779	chr11	95566046	95658479	6119	-	36.56	q21	protein_coding	MTMR2	myotubularin related protein 2 [Source:HGNC Symbol;Acc:7450]
1658	ENSG00000087074	3712.36	-0.392779	0.206781	-1.89949	0.0575	0.195551	chr19	49375649	49379314	3093	+	56.68	q13.33	protein_coding	PPP1R15A	protein phosphatase 1, regulatory subunit 15A [Source:HGNC Symbol;Acc:14375]
1659	ENSG00000087076	29.6806	0.739821	0.344182	2.14951	0.0315944	0.130355	chr19	49316274	49339935	1281	-	51.49	q13.33	protein_coding	HSD17B14	hydroxysteroid (17-beta) dehydrogenase 14 [Source:HGNC Symbol;Acc:23238]
1660	ENSG00000087077	668.008	0.253049	0.199197	1.27034	0.203963	0.436225	chr7	100464760	100471076	2802	+	56.45	q22.1	protein_coding	TRIP6	thyroid hormone receptor interactor 6 [Source:HGNC Symbol;Acc:12311]	MI0022722	hsa-mir-6875
1661	ENSG00000087085	7513.1	-0.567413	0.260452	-2.17857	0.0293634	0.123835	chr7	100487615	100494594	3730	-	64.48	q22.1	protein_coding	ACHE	acetylcholinesterase (Yt blood group) [Source:HGNC Symbol;Acc:108]
1662	ENSG00000087086	20647.2	0.190314	0.183173	1.03898	0.298813	0.545971	chr19	49468558	49470135	878	+	55.96	q13.33	protein_coding	FTL	ferritin, light polypeptide [Source:HGNC Symbol;Acc:3999]
1663	ENSG00000087087	2298.57	-0.239809	0.130067	-1.84374	0.065221	0.21178	chr7	100472733	100486285	4587	+	53.16	q22.1	protein_coding	SRRT	serrate RNA effector molecule homolog (Arabidopsis) [Source:HGNC Symbol;Acc:24101]
1664	ENSG00000087088	341.719	0.25074	0.191125	1.31192	0.189547	0.417195	chr19	49458072	49465055	2587	+	53.57	q13.33	protein_coding	BAX	BCL2-associated X protein [Source:HGNC Symbol;Acc:959]
1665	ENSG00000087095	1344.11	0.00591051	0.119695	0.0493799	0.960617	0.982602	chr17	26368763	26523407	5288	+	37.3	q11.2	protein_coding	NLK	nemo-like kinase [Source:HGNC Symbol;Acc:29858]
1666	ENSG00000087111	2245.79	-0.0648626	0.117191	-0.553475	0.579938	0.779068	chr17	26880401	26898890	5990	-	47.27	q11.2	protein_coding	PIGS	phosphatidylinositol glycan anchor biosynthesis, class S [Source:HGNC Symbol;Acc:14937]
1667	ENSG00000087116	996.16	1.40828	0.402303	3.50054	0.000464319	0.00635664	chr5	178537852	178772431	7687	-	53.87	q35.3	protein_coding	ADAMTS2	ADAM metallopeptidase with thrombospondin type 1 motif, 2 [Source:HGNC Symbol;Acc:218]
1668	ENSG00000087152	1782.36	-0.111764	0.165911	-0.673635	0.500544	0.724016	chr17	42269173	42277481	5301	-	59.15	q21.31	protein_coding	ATXN7L3	ataxin 7-like 3 [Source:HGNC Symbol;Acc:25416]
1669	ENSG00000087157	1673.31	-0.180353	0.111447	-1.61828	0.105602	0.288573	chr17	76374721	76421195	4965	+	52.04	q25.3	protein_coding	PGS1	phosphatidylglycerophosphate synthase 1 [Source:HGNC Symbol;Acc:30029]
1670	ENSG00000087191	2914.91	-0.569326	0.198122	-2.87361	0.00405815	0.0307373	chr17	61904512	61909379	4483	+	50.94	q23.3	protein_coding	PSMC5	proteasome (prosome, macropain) 26S subunit, ATPase, 5 [Source:HGNC Symbol;Acc:9552]
1671	ENSG00000087206	1956.04	-0.183641	0.0913348	-2.01064	0.0443639	0.164651	chr5	176332006	176449634	4852	-	42.38	q35.2	protein_coding	UIMC1	ubiquitin interaction motif containing 1 [Source:HGNC Symbol;Acc:30298]
1672	ENSG00000087237	40.407	-0.636697	0.497566	-1.27962	0.200678	0.431818	chr16	56995762	57017757	2085	+	50.8	q13	protein_coding	CETP	cholesteryl ester transfer protein, plasma [Source:HGNC Symbol;Acc:1869]
1673	ENSG00000087245	5355.62	0.25335	0.240982	1.05132	0.29311	0.539827	chr16	55423612	55540603	4933	+	45.67	q12.2	protein_coding	MMP2	matrix metallopeptidase 2 (gelatinase A, 72kDa gelatinase, 72kDa type IV collagenase) [Source:HGNC Symbol;Acc:7166]
1674	ENSG00000087250	28.0335	1.57299	0.509872	3.08508	0.00203501	0.0186044	chr16	56622986	56625000	1837	+	61.39	q12.2	protein_coding	MT3	metallothionein 3 [Source:HGNC Symbol;Acc:7408]
1675	ENSG00000087253	632.349	-0.190076	0.212897	-0.892807	0.37196	0.617468	chr16	55542910	55620582	7439	+	35.52	q12.2	protein_coding	LPCAT2	lysophosphatidylcholine acyltransferase 2 [Source:HGNC Symbol;Acc:26032]
1676	ENSG00000087258	259.655	-0.0536166	0.286909	-0.186876	0.851758	0.934969	chr16	56225302	56391356	9813	+	49.47	q12.2	protein_coding	GNAO1	guanine nucleotide binding protein (G protein), alpha activating activity polypeptide O [Source:HGNC Symbol;Acc:4389]
1677	ENSG00000087263	5633.52	-0.418342	0.180037	-2.32364	0.0201448	0.0958852	chr16	56485402	56513012	5806	+	40.39	q12.2	protein_coding	OGFOD1	2-oxoglutarate and iron-dependent oxygenase domain containing 1 [Source:HGNC Symbol;Acc:25585]
1678	ENSG00000087266	3163.6	-0.2412	0.146995	-1.64088	0.100823	0.280693	chr4	2794750	2842825	13968	+	59.23	p16.3	protein_coding	SH3BP2	SH3-domain binding protein 2 [Source:HGNC Symbol;Acc:10825]
1679	ENSG00000087269	2999.7	-0.208934	0.140606	-1.48595	0.137291	0.341241	chr4	2939660	2965112	3538	-	49.99	p16.3	protein_coding	NOP14	NOP14 nucleolar protein [Source:HGNC Symbol;Acc:16821]
1680	ENSG00000087274	17064.5	-0.406957	0.0949474	-4.28613	1.82e-05	0.000524972	chr4	2845584	2931803	13106	+	44.84	p16.3	protein_coding	ADD1	adducin 1 (alpha) [Source:HGNC Symbol;Acc:243]
1681	ENSG00000087299	1390.08	-0.867505	0.234817	-3.69439	0.000220413	0.00362266	chr14	50704281	50779266	3911	-	40.78	q21.3	protein_coding	L2HGDH	L-2-hydroxyglutarate dehydrogenase [Source:HGNC Symbol;Acc:20499]
1682	ENSG00000087301	842.973	-0.177692	0.145925	-1.21769	0.223341	0.459898	chr14	52897308	53019240	4739	-	36.83	q22.1	protein_coding	TXNDC16	thioredoxin domain containing 16 [Source:HGNC Symbol;Acc:19965]
1683	ENSG00000087302	4670.93	-0.0886639	0.0962283	-0.921391	0.356846	0.60363	chr14	52456193	52471420	2334	+	35.82	q22.1	protein_coding	C14orf166	chromosome 14 open reading frame 166 [Source:HGNC Symbol;Acc:23169]
1684	ENSG00000087303	2859.1	0.453182	0.196282	2.30883	0.0209529	0.0985546	chr14	52471521	52535712	6158	-	43.16	q22.1	protein_coding	NID2	nidogen 2 (osteonidogen) [Source:HGNC Symbol;Acc:13389]
1685	ENSG00000087338	612.865	-0.0732921	0.114061	-0.642568	0.520504	0.73794	chr2	70056774	70108528	4922	+	37.77	p13.3	protein_coding	GMCL1	germ cell-less, spermatogenesis associated 1 [Source:HGNC Symbol;Acc:23843]
1686	ENSG00000087365	5104.59	-0.0148153	0.112507	-0.131684	0.895234	0.954927	chr11	65818200	65836779	9795	+	48.41	q13.1	protein_coding	SF3B2	splicing factor 3b, subunit 2, 145kDa [Source:HGNC Symbol;Acc:10769]
1687	ENSG00000087448	1133.67	0.645981	0.143826	4.49142	7.08e-06	0.000245938	chr12	27932953	27955973	7622	+	43.03	p11.22	protein_coding	KLHL42	kelch-like family member 42 [Source:HGNC Symbol;Acc:29252]
1688	ENSG00000087460	43437.6	-0.501395	0.171947	-2.91599	0.00354561	0.0279073	chr20	57414773	57486247	13320	+	47.09	q13.32	protein_coding	GNAS	GNAS complex locus [Source:HGNC Symbol;Acc:4392]
1689	ENSG00000087470	9167.6	-0.0846376	0.128311	-0.659631	0.509491	0.730094	chr12	32832134	32898486	7184	+	38.22	p11.21	protein_coding	DNM1L	dynamin 1-like [Source:HGNC Symbol;Acc:2973]
1690	ENSG00000087494	45.2188	0.939956	0.510437	1.84147	0.0655521	0.212559	chr12	28111017	28125638	3377	-	40.26	p11.22	protein_coding	PTHLH	parathyroid hormone-like hormone [Source:HGNC Symbol;Acc:9607]
1691	ENSG00000087495	30.8388	-0.546763	0.405683	-1.34776	0.177736	0.40104	chr20	58152564	58422766	6095	+	47.63	q13.32	protein_coding	PHACTR3	phosphatase and actin regulator 3 [Source:HGNC Symbol;Acc:15833]
1692	ENSG00000087502	3603.25	0.060183	0.139295	0.432054	0.665702	0.833211	chr12	29490285	29534122	5826	-	34.04	p11.22	protein_coding	ERGIC2	ERGIC and golgi 2 [Source:HGNC Symbol;Acc:30208]
1693	ENSG00000087510	8.03143	-0.073983	0.509834	-0.145112	0.884622	0.950512	chr20	55204358	55214339	3112	+	48.97	q13.31	protein_coding	TFAP2C	transcription factor AP-2 gamma (activating enhancer binding protein 2 gamma) [Source:HGNC Symbol;Acc:11744]
1694	ENSG00000087586	579.7	-1.34375	0.38342	-3.50463	0.000457235	0.00628837	chr20	54944445	54967393	2928	-	42.93	q13.2	protein_coding	AURKA	aurora kinase A [Source:HGNC Symbol;Acc:11393]
1695	ENSG00000087589	64.2489	0.624451	0.277112	2.25342	0.0242324	0.108762	chr20	54987168	55034396	4025	+	45.37	q13.2	protein_coding	CASS4	Cas scaffolding protein family member 4 [Source:HGNC Symbol;Acc:15878]
1696	ENSG00000087842	909.98	-0.668064	0.23047	-2.8987	0.00374715	0.02903	chrX	15402921	15511687	2512	-	38.99	p22.2	protein_coding	PIR	pirin (iron-binding nuclear protein) [Source:HGNC Symbol;Acc:30048]
1697	ENSG00000087884	3923.45	-1.36388	0.352058	-3.87401	0.00010706	0.00209908	chr11	77532155	77629478	1943	+	41.83	q14.1	protein_coding	AAMDC	adipogenesis associated, Mth938 domain containing [Source:HGNC Symbol;Acc:30205]
1698	ENSG00000087903	392.315	-0.0686239	0.293447	-0.233855	0.815098	0.917234	chr19	5993175	6199583	9094	-	47.54	p13.3	protein_coding	RFX2	regulatory factor X, 2 (influences HLA class II expression) [Source:HGNC Symbol;Acc:9983]
1699	ENSG00000087995	1383.71	0.020748	0.0832044	0.249362	0.803081	0.910979	chr17	60501228	60527454	3114	+	45.27	q23.2	protein_coding	METTL2A	methyltransferase like 2A [Source:HGNC Symbol;Acc:25755]
1700	ENSG00000088002	5.98632	-0.519035	0.582812	-0.890571	0.373159	0.618602	chr19	49055332	49102682	2822	+	51.75	q13.33	protein_coding	SULT2B1	sulfotransferase family, cytosolic, 2B, member 1 [Source:HGNC Symbol;Acc:11459]
1701	ENSG00000088035	830.189	0.0299578	0.130463	0.229627	0.818382	0.918521	chr1	63833261	63904233	4950	+	37.93	p31.3	protein_coding	ALG6	ALG6, alpha-1,3-glucosyltransferase [Source:HGNC Symbol;Acc:23157]
1702	ENSG00000088038	984.48	0.0637186	0.147085	0.43321	0.664862	0.832554	chr19	54641444	54659419	6697	+	57.87	q13.42	protein_coding	CNOT3	CCR4-NOT transcription complex, subunit 3 [Source:HGNC Symbol;Acc:7879]
1703	ENSG00000088053	52.3182	0.416042	0.37539	1.10829	0.267736	0.511369	chr19	55525073	55549632	2703	-	48.31	q13.42	protein_coding	GP6	glycoprotein VI (platelet) [Source:HGNC Symbol;Acc:14388]
1704	ENSG00000088179	7896.57	-0.340968	0.192456	-1.77167	0.07645	0.235218	chr2	120517207	120741394	12542	+	37.04	q14.2	protein_coding	PTPN4	protein tyrosine phosphatase, non-receptor type 4 (megakaryocyte) [Source:HGNC Symbol;Acc:9656]
1705	ENSG00000088205	2836.29	0.101996	0.119816	0.851271	0.394619	0.637836	chr2	118572226	118589955	7851	+	39.26	q14.1	protein_coding	DDX18	DEAD (Asp-Glu-Ala-Asp) box polypeptide 18 [Source:HGNC Symbol;Acc:2741]
1706	ENSG00000088247	3492.44	-0.237464	0.152106	-1.56117	0.118483	0.310248	chr19	6413359	6424805	4563	-	59.03	p13.3	protein_coding	KHSRP	KH-type splicing regulatory protein [Source:HGNC Symbol;Acc:6316]
1707	ENSG00000088256	6535.62	-0.862696	0.199908	-4.31547	1.59e-05	0.000478294	chr19	3094408	3124002	6242	+	61.66	p13.3	protein_coding	GNA11	guanine nucleotide binding protein (G protein), alpha 11 (Gq class) [Source:HGNC Symbol;Acc:4379]
1708	ENSG00000088280	5082.9	-0.507184	0.281027	-1.80475	0.0711137	0.224432	chr1	23755056	23811061	4988	-	49.67	p36.12	protein_coding	ASAP3	ArfGAP with SH3 domain, ankyrin repeat and PH domain 3 [Source:HGNC Symbol;Acc:14987]
1709	ENSG00000088298	512.707	-0.0394233	0.140297	-0.280999	0.778711	0.897756	chr20	33703167	33865928	3380	-	46.07	q11.22	protein_coding	EDEM2	ER degradation enhancer, mannosidase alpha-like 2 [Source:HGNC Symbol;Acc:15877]
1710	ENSG00000088305	138.832	0.452389	0.283997	1.59294	0.111174	0.298071	chr20	31350191	31397162	4630	+	49.4	q11.21	protein_coding	DNMT3B	DNA (cytosine-5-)-methyltransferase 3 beta [Source:HGNC Symbol;Acc:2979]
1711	ENSG00000088320	142.356	-0.148609	0.273537	-0.543285	0.586933	0.783271	chr20	30063096	30072708	1665	+	50.66	q11.21	protein_coding	REM1	RAS (RAD and GEM)-like GTP-binding 1 [Source:HGNC Symbol;Acc:15922]
1712	ENSG00000088325	226.849	-1.24935	0.262641	-4.75687	1.97e-06	8.78e-05	chr20	30327074	30389608	3605	+	41.52	q11.21	protein_coding	TPX2	TPX2, microtubule-associated [Source:HGNC Symbol;Acc:1249]
1713	ENSG00000088340	99.8493	-0.592999	0.31531	-1.88069	0.0600146	0.200842	chr20	34146507	34195484	9212	-	49.61	q11.22	pseudogene	FER1L4	fer-1-like 4 (C. elegans), pseudogene [Source:HGNC Symbol;Acc:15801]
1714	ENSG00000088356	376.129	-0.296722	0.188681	-1.57261	0.11581	0.305739	chr20	30532758	30539895	1385	-	50.01	q11.21	protein_coding	PDRG1	p53 and DNA-damage regulated 1 [Source:HGNC Symbol;Acc:16119]
1715	ENSG00000088367	804.968	0.132907	0.243643	0.545496	0.585412	0.782245	chr20	34679426	34820721	7859	+	49.98	q11.23	protein_coding	EPB41L1	erythrocyte membrane protein band 4.1-like 1 [Source:HGNC Symbol;Acc:3378]
1716	ENSG00000088387	6223.46	0.41071	0.113574	3.61624	0.000298911	0.00456961	chr13	99445741	99738879	10061	-	41.78	q32.3	protein_coding	DOCK9	dedicator of cytokinesis 9 [Source:HGNC Symbol;Acc:14132]
1717	ENSG00000088448	16106.4	0.555336	0.136512	4.06803	4.74e-05	0.00111274	chr13	111530887	111567416	4557	-	40	q34	protein_coding	ANKRD10	ankyrin repeat domain 10 [Source:HGNC Symbol;Acc:20265]
1718	ENSG00000088451	419.969	0.186238	0.119623	1.55687	0.119501	0.311992	chr13	95226308	95248511	2586	-	36.99	q32.1	protein_coding	TGDS	TDP-glucose 4,6-dehydratase [Source:HGNC Symbol;Acc:20324]
1719	ENSG00000088538	833.625	0.316098	0.304825	1.03698	0.299745	0.547108	chr3	50712672	51421629	8755	+	40.15	p21.2	protein_coding	DOCK3	dedicator of cytokinesis 3 [Source:HGNC Symbol;Acc:2989]
1720	ENSG00000088543	2122.6	-0.412641	0.254671	-1.62029	0.10517	0.288114	chr3	50595462	50608458	3242	-	55.98	p21.2	protein_coding	C3orf18	chromosome 3 open reading frame 18 [Source:HGNC Symbol;Acc:24837]
1721	ENSG00000088682	10156.6	-0.547687	0.186688	-2.9337	0.00334946	0.0268211	chr16	57481337	57495187	4324	+	45.83	q21	protein_coding	COQ9	coenzyme Q9 [Source:HGNC Symbol;Acc:25302]
1722	ENSG00000088726	130.725	1.90248	0.541252	3.51497	0.000439811	0.00609769	chr3	12775024	12810956	3562	-	48.61	p25.2	protein_coding	TMEM40	transmembrane protein 40 [Source:HGNC Symbol;Acc:25620]
1723	ENSG00000088727	582.635	0.241512	0.137762	1.75311	0.0795836	0.240965	chr3	47269516	47324941	5867	-	48.45	p21.31	protein_coding	KIF9	kinesin family member 9 [Source:HGNC Symbol;Acc:16666]
1724	ENSG00000088756	3187.72	1.2645	0.29514	4.2844	1.83e-05	0.000527811	chr18	6729717	6915715	11910	+	39.1	p11.31	protein_coding	ARHGAP28	Rho GTPase activating protein 28 [Source:HGNC Symbol;Acc:25509]
1725	ENSG00000088766	3625.94	-0.420826	0.146135	-2.87971	0.00398042	0.0303213	chr20	5986736	6020699	5370	+	39.37	p12.3	protein_coding	CRLS1	cardiolipin synthase 1 [Source:HGNC Symbol;Acc:16148]
1726	ENSG00000088808	1111.03	-0.192414	0.163226	-1.17882	0.238471	0.477898	chr14	104200089	104313927	9031	-	44.51	q32.33	protein_coding	PPP1R13B	protein phosphatase 1, regulatory subunit 13B [Source:HGNC Symbol;Acc:14950]
1727	ENSG00000088812	5014.36	0.0308542	0.0915405	0.337055	0.736076	0.874646	chr20	3451687	3631769	8753	+	40.34	p13	protein_coding	ATRN	attractin [Source:HGNC Symbol;Acc:885]
1728	ENSG00000088826	194.433	-0.302634	0.251964	-1.2011	0.229713	0.467853	chr20	4101627	4168394	4943	+	49.87	p13	protein_coding	SMOX	spermine oxidase [Source:HGNC Symbol;Acc:15862]
1729	ENSG00000088827	959.905	0.481375	0.343286	1.40225	0.160839	0.377277	chr20	3667617	3687775	7886	-	56.25	p13	protein_coding	SIGLEC1	sialic acid binding Ig-like lectin 1, sialoadhesin [Source:HGNC Symbol;Acc:11127]
1730	ENSG00000088832	3264.06	-0.0303647	0.117264	-0.258944	0.795679	0.906949	chr20	1349622	1373806	2369	-	45.46	p13	protein_coding	FKBP1A	FK506 binding protein 1A, 12kDa [Source:HGNC Symbol;Acc:3711]	MI0022716	hsa-mir-6869
1731	ENSG00000088833	3973.72	-0.196108	0.134747	-1.45538	0.145563	0.354513	chr20	1422807	1454487	6617	-	45.86	p13	protein_coding	NSFL1C	NSFL1 (p97) cofactor (p47) [Source:HGNC Symbol;Acc:15912]
1732	ENSG00000088836	180.724	1.12633	0.324221	3.47397	0.00051282	0.00688185	chr20	3208063	3219836	4081	-	61.3	p13	protein_coding	SLC4A11	solute carrier family 4, sodium borate transporter, member 11 [Source:HGNC Symbol;Acc:16438]
1733	ENSG00000088854	7519.04	-0.167311	0.284751	-0.587571	0.556821	0.764392	chr20	3229951	3388272	8864	-	43.79	p13	protein_coding	C20orf194	chromosome 20 open reading frame 194 [Source:HGNC Symbol;Acc:17721]
1734	ENSG00000088876	1065.44	-0.293659	0.117303	-2.50342	0.0122999	0.0681637	chr20	2462463	2505348	4520	-	43.04	p13	protein_coding	ZNF343	zinc finger protein 343 [Source:HGNC Symbol;Acc:16017]
1735	ENSG00000088881	94.6268	0.0174639	0.251445	0.0694542	0.944628	0.97624	chr20	2673524	2740753	3716	+	49.22	p13	protein_coding	EBF4	early B-cell factor 4 [Source:HGNC Symbol;Acc:29278]
1736	ENSG00000088882	77.2961	3.22041	0.681208	4.7275	2.27e-06	9.79e-05	chr20	2774715	2781283	2391	-	59.72	p13	protein_coding	CPXM1	carboxypeptidase X (M14 family), member 1 [Source:HGNC Symbol;Acc:15771]
1737	ENSG00000088888	7120.56	-0.510423	0.198593	-2.5702	0.010164	0.0594634	chr20	3827487	3849280	4240	+	53.77	p13	protein_coding	MAVS	mitochondrial antiviral signaling protein [Source:HGNC Symbol;Acc:29233]
1738	ENSG00000088899	704.898	-0.138891	0.177293	-0.783396	0.433394	0.671908	chr20	3143263	3154192	5349	-	59.3	p13	protein_coding	LZTS3	Homo sapiens leucine zipper, putative tumor suppressor family member 3 (LZTS3), mRNA. [Source:RefSeq mRNA;Acc:NM_001282533]
1739	ENSG00000088926	32.7064	-0.9981	0.709006	-1.40774	0.159207	0.375012	chr4	187187099	187210835	4243	+	39.99	q35.2	protein_coding	F11	coagulation factor XI [Source:HGNC Symbol;Acc:3529]
1740	ENSG00000088930	4300.27	0.0347847	0.0796262	0.43685	0.66222	0.831136	chr20	21283942	21370463	3489	+	37.22	p11.23	protein_coding	XRN2	5'-3' exoribonuclease 2 [Source:HGNC Symbol;Acc:12836]
1741	ENSG00000088970	2318.66	0.557776	0.199001	2.80287	0.00506495	0.0360061	chr20	21106624	21227260	4802	+	41.17	p11.23	processed_transcript	PLK1S1	polo-like kinase 1 substrate 1 [Source:HGNC Symbol;Acc:15865]
1742	ENSG00000088986	1786.06	0.225529	0.282616	0.798006	0.424867	0.664141	chr12	120907653	120936296	2957	+	47.04	q24.31	protein_coding	DYNLL1	dynein, light chain, LC8-type 1 [Source:HGNC Symbol;Acc:15476]
1743	ENSG00000088992	154.904	-0.553576	0.230326	-2.40344	0.0162416	0.0828031	chr12	117476728	117537284	1926	-	51.4	q24.22	protein_coding	TESC	tescalcin [Source:HGNC Symbol;Acc:26065]
1744	ENSG00000089006	5085.89	-0.464791	0.0930604	-4.99451	5.9e-07	3.31e-05	chr20	17922241	17949623	7894	-	42.13	p11.23	protein_coding	SNX5	sorting nexin 5 [Source:HGNC Symbol;Acc:14969]
1745	ENSG00000089009	30363.7	-0.0724015	0.116342	-0.622316	0.533734	0.747743	chr12	112842994	112856642	4447	-	45.67	q24.13	protein_coding	RPL6	ribosomal protein L6 [Source:HGNC Symbol;Acc:10362]
1746	ENSG00000089012	4.49452	0.0638876	0.77911	0.0820008	0.934646	0.972053	chr20	1609798	1638425	2242	-	43.73	p13	protein_coding	SIRPG	signal-regulatory protein gamma [Source:HGNC Symbol;Acc:15757]
1747	ENSG00000089022	2462.16	-0.189667	0.0943287	-2.01071	0.0443566	0.164651	chr12	112279782	112334343	5576	+	43.96	q24.12	protein_coding	MAPKAPK5	mitogen-activated protein kinase-activated protein kinase 5 [Source:HGNC Symbol;Acc:6889]
1748	ENSG00000089041	124.913	0.480725	0.205668	2.33738	0.0194194	0.0934177	chr12	121570622	121623876	3587	+	46.44	q24.31	protein_coding	P2RX7	purinergic receptor P2X, ligand-gated ion channel, 7 [Source:HGNC Symbol;Acc:8537]
1749	ENSG00000089048	2370.77	0.323136	0.134035	2.41082	0.0159165	0.0816702	chr20	13694969	13765532	3216	-	37.98	p12.1	protein_coding	ESF1	ESF1, nucleolar pre-rRNA processing protein, homolog (S. cerevisiae) [Source:HGNC Symbol;Acc:15898]
1750	ENSG00000089050	690.99	0.128986	0.134418	0.959587	0.337263	0.584963	chr20	18467184	18477887	3861	-	41.68	p11.23	protein_coding	RBBP9	retinoblastoma binding protein 9 [Source:HGNC Symbol;Acc:9892]
1751	ENSG00000089053	11983.5	0.0073253	0.0986176	0.0742799	0.940788	0.97469	chr12	121746048	121837699	12304	-	44.55	q24.31	protein_coding	ANAPC5	anaphase promoting complex subunit 5 [Source:HGNC Symbol;Acc:15713]
1752	ENSG00000089057	1382.56	0.607392	0.165074	3.67952	0.000233671	0.00378014	chr20	4833002	4990939	7523	-	44.93	p13	protein_coding	SLC23A2	solute carrier family 23 (ascorbic acid transporter), member 2 [Source:HGNC Symbol;Acc:10973]
1753	ENSG00000089060	1362.1	-0.484965	0.145901	-3.32393	0.000887595	0.0101999	chr12	113736564	113797298	6768	-	49.93	q24.13	protein_coding	SLC8B1	solute carrier family 8 (sodium/lithium/calcium exchanger), member B1 [Source:HGNC Symbol;Acc:26175]
1754	ENSG00000089063	4209.32	-0.0810866	0.106743	-0.759641	0.447469	0.683113	chr20	5080486	5093749	2038	-	43.08	p13	protein_coding	TMEM230	transmembrane protein 230 [Source:HGNC Symbol;Acc:15876]
1755	ENSG00000089091	122.087	0.259733	0.17177	1.51209	0.130511	0.330303	chr20	18364011	18447925	6637	-	41.71	p11.23	protein_coding	DZANK1	double zinc ribbon and ankyrin repeat domains 1 [Source:HGNC Symbol;Acc:15858]
1756	ENSG00000089094	2200.44	-0.612983	0.164133	-3.73468	0.000187957	0.00322014	chr12	121866900	122018920	13623	-	50.77	q24.31	protein_coding	KDM2B	lysine (K)-specific demethylase 2B [Source:HGNC Symbol;Acc:13610]
1757	ENSG00000089101	2821.56	0.100372	0.45517	0.220515	0.82547	0.922256	chr20	20033158	20341346	7319	+	41.33	p11.23	protein_coding	C20orf26	chromosome 20 open reading frame 26 [Source:HGNC Symbol;Acc:15872]
1758	ENSG00000089123	440.251	0.290406	0.125595	2.31223	0.0207649	0.0978877	chr20	13246709	13619587	3365	-	38.76	p12.1	protein_coding	TASP1	taspase, threonine aspartase, 1 [Source:HGNC Symbol;Acc:15859]
1759	ENSG00000089154	15527.8	-0.153541	0.092033	-1.66832	0.0952515	0.270516	chr12	120565007	120632513	9654	-	49.67	q24.23	protein_coding	GCN1L1	GCN1 general control of amino-acid synthesis 1-like 1 (yeast) [Source:HGNC Symbol;Acc:4199]
1760	ENSG00000089157	56029.2	0.198845	0.145867	1.3632	0.172821	0.395028	chr12	120634489	120639038	4001	-	48.92	q24.23	protein_coding	RPLP0	ribosomal protein, large, P0 [Source:HGNC Symbol;Acc:10371]
1761	ENSG00000089159	9016.7	-0.309213	0.16543	-1.86914	0.0616034	0.204081	chr12	120648250	120703574	7452	-	53	q24.31	protein_coding	PXN	paxillin [Source:HGNC Symbol;Acc:9718]
1762	ENSG00000089163	286.862	-0.423248	0.18207	-2.32465	0.0200909	0.0957263	chr12	120740119	120751052	1222	+	48.77	q24.31	protein_coding	SIRT4	sirtuin 4 [Source:HGNC Symbol;Acc:14932]
1763	ENSG00000089169	10.5021	-0.186046	0.856692	-0.217168	0.828077	0.923743	chr12	113008184	113336686	10381	+	43.79	q24.13	protein_coding	RPH3A	rabphilin 3A homolog (mouse) [Source:HGNC Symbol;Acc:17056]
1764	ENSG00000089177	2916.17	0.0804314	0.139797	0.575344	0.565059	0.769539	chr20	16252749	16554078	6278	-	40.7	p12.1	protein_coding	KIF16B	kinesin family member 16B [Source:HGNC Symbol;Acc:15869]
1765	ENSG00000089195	813.465	-0.0332968	0.168642	-0.197441	0.843482	0.930997	chr20	5917881	5931182	3754	-	42.51	p12.3	protein_coding	TRMT6	tRNA methyltransferase 6 homolog (S. cerevisiae) [Source:HGNC Symbol;Acc:20900]
1766	ENSG00000089199	759.25	2.79598	0.852112	3.28123	0.00103354	0.0113959	chr20	5892076	5906007	4535	+	42.87	p12.3	protein_coding	CHGB	chromogranin B (secretogranin 1) [Source:HGNC Symbol;Acc:1930]
1767	ENSG00000089220	21291.3	0.0673259	0.122978	0.547465	0.584059	0.781366	chr12	118573663	118583389	1780	+	49.19	q24.23	protein_coding	PEBP1	phosphatidylethanolamine binding protein 1 [Source:HGNC Symbol;Acc:8630]
1768	ENSG00000089225	80.968	0.450225	0.258678	1.74049	0.0817738	0.245396	chr12	114791736	114846247	4363	-	45.85	q24.21	protein_coding	TBX5	T-box 5 [Source:HGNC Symbol;Acc:11604]
1769	ENSG00000089234	2265.82	-0.207619	0.0897285	-2.31386	0.0206754	0.0976068	chr12	112079950	112123790	4686	-	44.41	q24.12	protein_coding	BRAP	BRCA1 associated protein [Source:HGNC Symbol;Acc:1099]
1770	ENSG00000089248	1414.4	-0.000280627	0.146102	-0.00192077	0.998467	0.999297	chr12	112451120	112461255	3083	+	47.22	q24.13	protein_coding	ERP29	endoplasmic reticulum protein 29 [Source:HGNC Symbol;Acc:13799]
1771	ENSG00000089250	12738.5	-1.65038	0.415041	-3.97642	7e-05	0.00151717	chr12	117645947	117889975	13144	-	47.35	q24.22	protein_coding	NOS1	nitric oxide synthase 1 (neuronal) [Source:HGNC Symbol;Acc:7872]
1772	ENSG00000089280	3814.68	-0.0361705	0.156296	-0.231422	0.816987	0.917975	chr16	31191431	31203127	7218	+	47.05	p11.2	protein_coding	FUS	fused in sarcoma [Source:HGNC Symbol;Acc:4010]
1773	ENSG00000089289	3813.77	-0.0585356	0.124795	-0.469053	0.639032	0.816579	chrX	69353299	69386174	1862	+	42.89	q13.1	protein_coding	IGBP1	immunoglobulin (CD79A) binding protein 1 [Source:HGNC Symbol;Acc:5461]
1774	ENSG00000089327	281.002	-0.163882	0.156307	-1.04846	0.294426	0.541225	chr19	35645633	35660786	2993	+	49.87	q13.12	protein_coding	FXYD5	FXYD domain containing ion transport regulator 5 [Source:HGNC Symbol;Acc:4029]
1775	ENSG00000089335	5030.69	0.0479988	0.13218	0.363132	0.716506	0.863996	chr19	35168544	35177302	5032	+	39.83	q13.11	protein_coding	ZNF302	zinc finger protein 302 [Source:HGNC Symbol;Acc:13848]
1776	ENSG00000089351	1981.71	-0.451214	0.19164	-2.35448	0.0185484	0.0906088	chr19	35485688	35517375	5942	+	55.68	q13.11	protein_coding	GRAMD1A	GRAM domain containing 1A [Source:HGNC Symbol;Acc:29305]
1777	ENSG00000089356	50.988	-0.193353	0.290845	-0.664799	0.506179	0.727463	chr19	35606732	35615228	3385	+	53.87	q13.12	protein_coding	FXYD3	FXYD domain containing ion transport regulator 3 [Source:HGNC Symbol;Acc:4027]	MI0022734	hsa-mir-6887
1778	ENSG00000089472	184.122	0.265691	0.227579	1.16747	0.243021	0.483622	chrX	65382391	65488709	7113	+	38.5	q12	protein_coding	HEPH	hephaestin [Source:HGNC Symbol;Acc:4866]
1779	ENSG00000089486	2020.77	-0.124818	0.179869	-0.69394	0.48772	0.715015	chr16	4560676	4588829	4268	-	51.97	p13.3	protein_coding	CDIP1	cell death-inducing p53 target 1 [Source:HGNC Symbol;Acc:13234]
1780	ENSG00000089505	49.4867	0.750563	0.217045	3.4581	0.000544006	0.00719039	chr16	66600294	66613040	1467	+	43.3	q21	protein_coding	CMTM1	CKLF-like MARVEL transmembrane domain containing 1 [Source:HGNC Symbol;Acc:19172]
1781	ENSG00000089558	9.84368	-0.186753	0.460285	-0.405734	0.684938	0.845005	chr17	40308909	40333296	3924	-	55.01	q21.2	protein_coding	KCNH4	potassium voltage-gated channel, subfamily H (eag-related), member 4 [Source:HGNC Symbol;Acc:6253]
1782	ENSG00000089597	4751.73	-0.0333561	0.107192	-0.31118	0.755664	0.884999	chr11	62392298	62414104	4933	-	49.94	q12.3	protein_coding	GANAB	glucosidase, alpha; neutral AB [Source:HGNC Symbol;Acc:4138]
1783	ENSG00000089639	165.699	0.0118836	0.226093	0.0525606	0.958082	0.981906	chr19	19740285	19754476	3740	-	56.14	p13.11	protein_coding	GMIP	GEM interacting protein [Source:HGNC Symbol;Acc:24852]
1784	ENSG00000089682	1753.63	-0.233025	0.125573	-1.85568	0.0634985	0.208022	chrX	106307650	106362057	6105	-	36.02	q22.3	protein_coding	RBM41	RNA binding motif protein 41 [Source:HGNC Symbol;Acc:25617]
1785	ENSG00000089685	13.5185	1.21859	0.496761	2.45306	0.0141646	0.075348	chr17	76210267	76221717	3815	+	49.27	q25.3	protein_coding	BIRC5	baculoviral IAP repeat containing 5 [Source:HGNC Symbol;Acc:593]
1786	ENSG00000089692	18.9865	-0.739068	0.472868	-1.56295	0.118065	0.30976	chr12	6881678	6887621	3056	+	57.37	p13.31	protein_coding	LAG3	lymphocyte-activation gene 3 [Source:HGNC Symbol;Acc:6476]
1787	ENSG00000089693	4072.22	0.0843173	0.135137	0.623941	0.532666	0.747096	chr12	6857170	6876641	3773	-	52.29	p13.31	protein_coding	MLF2	myeloid leukemia factor 2 [Source:HGNC Symbol;Acc:7126]
1788	ENSG00000089723	123.717	0.113571	0.213329	0.532375	0.594466	0.788694	chr14	94492675	94515276	4252	+	52.77	q32.12	protein_coding	OTUB2	OTU domain, ubiquitin aldehyde binding 2 [Source:HGNC Symbol;Acc:20351]
1789	ENSG00000089737	8863.84	0.0561029	0.105109	0.53376	0.593507	0.788126	chr14	94517266	94547591	6007	-	42.84	q32.12	protein_coding	DDX24	DEAD (Asp-Glu-Ala-Asp) box helicase 24 [Source:HGNC Symbol;Acc:13266]
1790	ENSG00000089775	3207.1	0.0236658	0.130797	0.180936	0.856418	0.936868	chr14	64915824	64971931	12229	-	42.25	q23.3	protein_coding	ZBTB25	zinc finger and BTB domain containing 25 [Source:HGNC Symbol;Acc:13112]
1791	ENSG00000089818	1489.94	0.209477	0.117216	1.78711	0.0739197	0.22986	chr12	8234807	8250367	4155	+	42.07	p13.31	protein_coding	NECAP1	NECAP endocytosis associated 1 [Source:HGNC Symbol;Acc:24539]
1792	ENSG00000089820	1689.61	-0.128017	0.123201	-1.03909	0.298765	0.545971	chrX	153172821	153200452	5580	-	58.14	q28	protein_coding	ARHGAP4	Rho GTPase activating protein 4 [Source:HGNC Symbol;Acc:674]
1793	ENSG00000089847	169.996	-0.399263	0.363345	-1.09885	0.271832	0.516258	chr19	4183351	4224811	4474	+	53.6	p13.3	protein_coding	ANKRD24	ankyrin repeat domain 24 [Source:HGNC Symbol;Acc:29424]
1794	ENSG00000089876	2630.53	0.053908	0.135369	0.398231	0.69046	0.848263	chr10	127524906	127585005	3948	-	41.45	q26.2	protein_coding	DHX32	DEAH (Asp-Glu-Ala-His) box polypeptide 32 [Source:HGNC Symbol;Acc:16717]
1795	ENSG00000089902	2166.45	-0.111511	0.19347	-0.576371	0.564364	0.768826	chr14	103058998	103196913	6202	+	43.48	q32.31	protein_coding	RCOR1	REST corepressor 1 [Source:HGNC Symbol;Acc:17441]
1796	ENSG00000089916	11728.4	-0.0214518	0.122467	-0.175164	0.860951	0.939101	chr14	76618259	76720685	21987	+	39.76	q24.3	protein_coding	GPATCH2L	G patch domain containing 2-like [Source:HGNC Symbol;Acc:20210]
1797	ENSG00000090006	6122.71	-0.366948	0.31194	-1.17634	0.239459	0.478944	chr19	41098789	41135725	8109	+	56.47	q13.2	protein_coding	LTBP4	latent transforming growth factor beta binding protein 4 [Source:HGNC Symbol;Acc:6717]
1798	ENSG00000090013	3439	-0.81729	0.143452	-5.6973	1.22e-08	1.22e-06	chr19	40953696	40971747	1665	-	49.8	q13.2	protein_coding	BLVRB	biliverdin reductase B (flavin reductase (NADPH)) [Source:HGNC Symbol;Acc:1063]
1799	ENSG00000090020	1072.4	0.438386	0.288568	1.51918	0.128718	0.327604	chr1	27425306	27493472	5974	-	51.71	p36.11	protein_coding	SLC9A1	solute carrier family 9, subfamily A (NHE1, cation proton antiporter 1), member 1 [Source:HGNC Symbol;Acc:11071]
1800	ENSG00000090054	1284.67	0.0953805	0.10262	0.929457	0.352652	0.599725	chr9	94794281	94877666	3658	-	41.6	q22.31	protein_coding	SPTLC1	serine palmitoyltransferase, long chain base subunit 1 [Source:HGNC Symbol;Acc:11277]
1801	ENSG00000090060	7382.88	-0.189739	0.0918409	-2.06595	0.0388329	0.150229	chr14	96967770	97033448	12766	+	36.57	q32.2	protein_coding	PAPOLA	poly(A) polymerase alpha [Source:HGNC Symbol;Acc:14981]
1802	ENSG00000090061	1599.88	-0.408646	0.171686	-2.3802	0.0173034	0.0864897	chr14	99947506	100001381	8220	+	50.14	q32.2	protein_coding	CCNK	cyclin K [Source:HGNC Symbol;Acc:1596]
1803	ENSG00000090097	4653.87	-0.251766	0.144089	-1.7473	0.0805862	0.242906	chr3	51991470	52002426	3686	-	60.69	p21.2	protein_coding	PCBP4	poly(rC) binding protein 4 [Source:HGNC Symbol;Acc:8652]
1804	ENSG00000090104	85.0347	0.926935	0.416291	2.22665	0.0259707	0.11399	chr1	192544857	192549161	4117	+	33.89	q31.2	protein_coding	RGS1	regulator of G-protein signaling 1 [Source:HGNC Symbol;Acc:9991]
1805	ENSG00000090238	2004.1	-0.228202	0.152404	-1.49734	0.134304	0.336418	chr16	30103635	30108236	3181	-	58.41	p11.2	protein_coding	YPEL3	yippee-like 3 (Drosophila) [Source:HGNC Symbol;Acc:18327]
1806	ENSG00000090263	2431.8	-0.370772	0.187161	-1.98103	0.0475878	0.17254	chr7	140705854	140715028	1818	-	42.26	q34	protein_coding	MRPS33	mitochondrial ribosomal protein S33 [Source:HGNC Symbol;Acc:16634]
1807	ENSG00000090266	7254.27	-0.359318	0.217721	-1.65036	0.0988696	0.276927	chr7	140390577	140422590	4447	+	43.57	q34	protein_coding	NDUFB2	NADH dehydrogenase (ubiquinone) 1 beta subcomplex, 2, 8kDa [Source:HGNC Symbol;Acc:7697]
1808	ENSG00000090273	2112.6	-0.520259	0.141909	-3.66615	0.000246226	0.00394246	chr1	27226729	27273353	2856	+	48.43	p36.11	protein_coding	NUDC	nudC nuclear distribution protein [Source:HGNC Symbol;Acc:8045]
1809	ENSG00000090316	2324.54	0.00966053	0.100687	0.0959458	0.923564	0.967673	chr4	1283639	1333935	9857	+	55.03	p16.3	protein_coding	MAEA	macrophage erythroblast attacher [Source:HGNC Symbol;Acc:13731]
1810	ENSG00000090339	555.14	-0.174711	0.262943	-0.664445	0.506405	0.727643	chr19	10381511	10397291	3706	+	52.08	p13.2	protein_coding	ICAM1	intercellular adhesion molecule 1 [Source:HGNC Symbol;Acc:5344]
1811	ENSG00000090372	2711.09	-0.183498	0.125011	-1.46785	0.142144	0.349344	chr19	47222764	47250251	7641	-	57.35	q13.32	protein_coding	STRN4	striatin, calmodulin binding protein 4 [Source:HGNC Symbol;Acc:15721]
1812	ENSG00000090376	1118.98	-0.0126187	0.166186	-0.075931	0.939474	0.97429	chr12	66582659	66648402	10004	+	40.1	q14.3	protein_coding	IRAK3	interleukin-1 receptor-associated kinase 3 [Source:HGNC Symbol;Acc:17020]	MI0022214	hsa-mir-6502
1813	ENSG00000090382	749.807	0.895358	0.397792	2.25082	0.0243971	0.109228	chr12	69742121	69748014	1764	+	36.61	q15	protein_coding	LYZ	lysozyme [Source:HGNC Symbol;Acc:6740]
1814	ENSG00000090432	1892.19	-0.43811	0.158234	-2.76875	0.00562724	0.0389415	chr1	20825943	20834654	2436	-	47.53	p36.12	protein_coding	MUL1	mitochondrial E3 ubiquitin protein ligase 1 [Source:HGNC Symbol;Acc:25762]
1815	ENSG00000090447	503.987	-0.324187	0.223548	-1.45019	0.147005	0.356646	chr16	4307187	4323076	7867	-	56.39	p13.3	protein_coding	TFAP4	transcription factor AP-4 (activating enhancer binding protein 4) [Source:HGNC Symbol;Acc:11745]
1816	ENSG00000090470	1149.07	-0.0606224	0.0854242	-0.709663	0.477913	0.706887	chr15	65409717	65426174	3263	-	45.72	q22.31	protein_coding	PDCD7	programmed cell death 7 [Source:HGNC Symbol;Acc:8767]
1817	ENSG00000090487	2056.12	0.0453457	0.0987648	0.459129	0.646142	0.821168	chr15	65255362	65282648	3984	-	44.05	q22.31	protein_coding	SPG21	spastic paraplegia 21 (autosomal recessive, Mast syndrome) [Source:HGNC Symbol;Acc:20373]
1818	ENSG00000090520	1214.53	0.1971	0.153888	1.2808	0.200263	0.431233	chr3	186285192	186315061	6040	+	40.86	q27.3	protein_coding	DNAJB11	DnaJ (Hsp40) homolog, subfamily B, member 11 [Source:HGNC Symbol;Acc:14889]
1819	ENSG00000090530	154.707	0.695156	0.305826	2.27305	0.0230234	0.105104	chr3	189674517	189840226	5605	-	38.18	q28	protein_coding	LEPREL1	leprecan-like 1 [Source:HGNC Symbol;Acc:19317]
1820	ENSG00000090534	75.0096	-0.763813	0.371356	-2.05682	0.0397031	0.152664	chr3	184089723	184095932	1915	-	50.58	q27.1	protein_coding	THPO	thrombopoietin [Source:HGNC Symbol;Acc:11795]
1821	ENSG00000090539	757.872	-0.272535	0.256941	-1.06069	0.288832	0.535133	chr3	184097861	184108524	6620	+	59.37	q27.1	protein_coding	CHRD	chordin [Source:HGNC Symbol;Acc:1949]
1822	ENSG00000090554	156.744	-0.556001	0.184961	-3.00605	0.00264663	0.0225801	chr19	49977464	49989488	2902	+	53.99	q13.33	protein_coding	FLT3LG	fms-related tyrosine kinase 3 ligand [Source:HGNC Symbol;Acc:3766]
1823	ENSG00000090565	5933.24	0.579694	0.163299	3.5499	0.000385377	0.00551296	chr16	475619	573011	6317	+	52.85	p13.3	protein_coding	RAB11FIP3	RAB11 family interacting protein 3 (class II) [Source:HGNC Symbol;Acc:17224]
1824	ENSG00000090581	1948.26	-0.127931	0.131283	-0.974469	0.329824	0.578067	chr16	1401924	1413352	3672	+	56.39	p13.3	protein_coding	GNPTG	N-acetylglucosamine-1-phosphate transferase, gamma subunit [Source:HGNC Symbol;Acc:23026]
1825	ENSG00000090612	1521.68	0.309452	0.189325	1.6345	0.102154	0.282715	chr12	133707570	133783698	6905	+	40.51	q24.33	protein_coding	ZNF268	zinc finger protein 268 [Source:HGNC Symbol;Acc:13061]
1826	ENSG00000090615	9202.17	0.0516686	0.0889824	0.580661	0.561469	0.766949	chr12	133345495	133405444	10550	-	53.56	q24.33	protein_coding	GOLGA3	golgin A3 [Source:HGNC Symbol;Acc:4426]
1827	ENSG00000090621	24818.8	-0.162169	0.125573	-1.29143	0.196554	0.426379	chr1	40026488	40042462	6782	-	47.27	p34.3	protein_coding	PABPC4	poly(A) binding protein, cytoplasmic 4 (inducible form) [Source:HGNC Symbol;Acc:8557]
1828	ENSG00000090659	239.617	1.17676	0.34986	3.36351	0.000769579	0.00927258	chr19	7804879	7812464	4428	-	53.1	p13.2	protein_coding	CD209	CD209 molecule [Source:HGNC Symbol;Acc:1641]
1829	ENSG00000090661	285.212	0.359048	0.299073	1.20054	0.229931	0.468137	chr19	8271620	8327305	4059	+	52.88	p13.2	protein_coding	CERS4	ceramide synthase 4 [Source:HGNC Symbol;Acc:23747]
1830	ENSG00000090674	595.43	-0.0665641	0.131914	-0.504602	0.613839	0.800924	chr19	7587512	7598895	3956	+	57.01	p13.2	protein_coding	MCOLN1	mucolipin 1 [Source:HGNC Symbol;Acc:13356]
1831	ENSG00000090686	3469.74	-0.385435	0.110936	-3.4744	0.000511996	0.00687592	chr1	22004791	22110099	9497	-	41.84	p36.12	protein_coding	USP48	ubiquitin specific peptidase 48 [Source:HGNC Symbol;Acc:18533]
1832	ENSG00000090776	909.291	-0.328444	0.271607	-1.20926	0.226561	0.463796	chrX	68048840	68061990	3314	+	56.43	q13.1	protein_coding	EFNB1	ephrin-B1 [Source:HGNC Symbol;Acc:3226]
1833	ENSG00000090857	6649.67	0.00288323	0.184455	0.015631	0.987529	0.994077	chr16	70147529	70195203	9148	+	47.38	q22.1	protein_coding	PDPR	pyruvate dehydrogenase phosphatase regulatory subunit [Source:HGNC Symbol;Acc:30264]
1834	ENSG00000090861	5709.97	-0.513026	0.221398	-2.31722	0.020492	0.0970402	chr16	70286198	70323446	4498	-	49.47	q22.1	protein_coding	AARS	alanyl-tRNA synthetase [Source:HGNC Symbol;Acc:20]
1835	ENSG00000090863	13784.8	0.146454	0.126321	1.15938	0.246301	0.487829	chr16	74485856	74641012	9550	-	42.17	q23.1	protein_coding	GLG1	golgi glycoprotein 1 [Source:HGNC Symbol;Acc:4316]
1836	ENSG00000090889	33.8975	1.19325	0.317586	3.75724	0.000171797	0.00300532	chrX	69509879	69640682	4723	+	40.49	q13.1	protein_coding	KIF4A	kinesin family member 4A [Source:HGNC Symbol;Acc:13339]
1837	ENSG00000090905	10066.9	-0.154499	0.0989183	-1.56189	0.118315	0.310141	chr16	24741016	24838953	12522	+	40.57	p12.1	protein_coding	TNRC6A	trinucleotide repeat containing 6A [Source:HGNC Symbol;Acc:11969]
1838	ENSG00000090920	421.107	2.26562	0.442547	5.1195	3.06e-07	1.93e-05	chr19	40353963	40440533	16564	-	51.95	q13.2	protein_coding	FCGBP	Fc fragment of IgG binding protein [Source:HGNC Symbol;Acc:13572]
1839	ENSG00000090924	824.878	0.331382	0.242751	1.36511	0.172219	0.394052	chr19	39903225	39919054	9199	+	56.77	q13.2	protein_coding	PLEKHG2	pleckstrin homology domain containing, family G (with RhoGef domain) member 2 [Source:HGNC Symbol;Acc:29515]
1840	ENSG00000090971	97.6335	-0.00986729	0.297076	-0.0332147	0.973503	0.988254	chr19	55996371	55998935	2163	+	66.08	q13.42	protein_coding	NAT14	N-acetyltransferase 14 (GCN5-related, putative) [Source:HGNC Symbol;Acc:28918]
1841	ENSG00000090975	1035.64	-0.416803	0.245862	-1.69527	0.090024	0.260738	chr12	123468027	123634562	9165	-	51.35	q24.31	protein_coding	PITPNM2	phosphatidylinositol transfer protein, membrane-associated 2 [Source:HGNC Symbol;Acc:21044]
1842	ENSG00000090989	2616.11	0.0641621	0.103569	0.619511	0.53558	0.748897	chr4	56719782	56771200	5347	+	34.99	q12	protein_coding	EXOC1	exocyst complex component 1 [Source:HGNC Symbol;Acc:30380]
1843	ENSG00000091009	3996.79	-0.13611	0.105705	-1.28764	0.197871	0.428204	chr5	145583113	145718814	6900	+	39.81	q32	protein_coding	RBM27	RNA binding motif protein 27 [Source:HGNC Symbol;Acc:29243]
1844	ENSG00000091039	8278.97	1.27954	0.232119	5.51244	3.54e-08	3.12e-06	chr12	76745577	76953589	9198	-	36.48	q21.2	protein_coding	OSBPL8	oxysterol binding protein-like 8 [Source:HGNC Symbol;Acc:16396]
1845	ENSG00000091073	964.045	-0.236828	0.108836	-2.176	0.029555	0.12441	chr7	76090993	76135312	5042	+	54.28	q11.23	protein_coding	DTX2	deltex homolog 2 (Drosophila) [Source:HGNC Symbol;Acc:15973]
1846	ENSG00000091106	355.415	-0.148031	0.154619	-0.957389	0.338371	0.586073	chr2	32449522	32490923	3624	-	42.88	p22.3	protein_coding	NLRC4	NLR family, CARD domain containing 4 [Source:HGNC Symbol;Acc:16412]
1847	ENSG00000091127	1359.99	0.0671037	0.0753715	0.890307	0.373301	0.61878	chr7	105080108	105162714	4421	-	43	q22.3	protein_coding	PUS7	pseudouridylate synthase 7 homolog (S. cerevisiae) [Source:HGNC Symbol;Acc:26033]
1848	ENSG00000091128	39.931	-0.0772953	0.476568	-0.162191	0.871155	0.943996	chr7	107663993	107770801	7016	-	40.71	q31.1	protein_coding	LAMB4	laminin, beta 4 [Source:HGNC Symbol;Acc:6491]
1849	ENSG00000091129	494.764	3.74843	0.722866	5.18551	2.15e-07	1.45e-05	chr7	107788068	108097161	7939	-	39	q31.1	protein_coding	NRCAM	neuronal cell adhesion molecule [Source:HGNC Symbol;Acc:7994]
1850	ENSG00000091136	6174.07	0.523198	0.151993	3.44226	0.000576881	0.00751312	chr7	107564244	107643700	8140	-	42.42	q31.1	protein_coding	LAMB1	laminin, beta 1 [Source:HGNC Symbol;Acc:6486]
1851	ENSG00000091137	75.9238	0.102988	0.300613	0.342591	0.731906	0.872251	chr7	107301080	107358254	5800	+	39.9	q22.3	protein_coding	SLC26A4	solute carrier family 26 (anion exchanger), member 4 [Source:HGNC Symbol;Acc:8818]
1852	ENSG00000091138	57.7489	-0.672066	0.241305	-2.78513	0.00535056	0.0375688	chr7	107405912	107443670	3382	-	39.28	q31.1	protein_coding	SLC26A3	solute carrier family 26 (anion exchanger), member 3 [Source:HGNC Symbol;Acc:3018]
1853	ENSG00000091140	13158.3	-0.42396	0.200194	-2.11774	0.034197	0.137484	chr7	107531415	107572175	5299	+	36.67	q31.1	protein_coding	DLD	dihydrolipoamide dehydrogenase [Source:HGNC Symbol;Acc:2898]
1854	ENSG00000091157	4750.96	0.0403828	0.0994631	0.406007	0.684737	0.844896	chr18	54318574	54698828	10685	+	36.25	q21.31	protein_coding	WDR7	WD repeat domain 7 [Source:HGNC Symbol;Acc:13490]
1855	ENSG00000091164	9345.24	-0.217545	0.164685	-1.32097	0.186511	0.41291	chr18	54264439	54318831	11298	-	38.58	q21.31	protein_coding	TXNL1	thioredoxin-like 1 [Source:HGNC Symbol;Acc:12436]
1856	ENSG00000091181	11.4442	-0.385159	0.504968	-0.762739	0.445619	0.681393	chr3	3111233	3168297	3377	-	41.79	p26.2	protein_coding	IL5RA	interleukin 5 receptor, alpha [Source:HGNC Symbol;Acc:6017]
1857	ENSG00000091262	1388.19	-2.30332	0.494453	-4.65832	3.19e-06	0.00012895	chr16	16242785	16317379	7559	-	49.86	p13.11	protein_coding	ABCC6	ATP-binding cassette, sub-family C (CFTR/MRP), member 6 [Source:HGNC Symbol;Acc:57]
1858	ENSG00000091317	937.873	0.471164	0.0880668	5.35007	8.79e-08	6.77e-06	chr3	32522804	32544900	4413	-	38.68	p22.3	protein_coding	CMTM6	CKLF-like MARVEL transmembrane domain containing 6 [Source:HGNC Symbol;Acc:19177]
1859	ENSG00000091409	7214.23	0.0649058	0.215285	0.301488	0.763042	0.889068	chr2	173292082	173371181	6704	+	41.78	q31.1	protein_coding	ITGA6	integrin, alpha 6 [Source:HGNC Symbol;Acc:6142]
1860	ENSG00000091428	409.637	-0.134608	0.192303	-0.699979	0.483941	0.711824	chr2	173600002	173917621	7161	+	40.56	q31.1	protein_coding	RAPGEF4	Rap guanine nucleotide exchange factor (GEF) 4 [Source:HGNC Symbol;Acc:16626]
1861	ENSG00000091436	96346.4	-0.0341599	0.180215	-0.18955	0.849661	0.934007	chr2	173940163	174132738	13799	+	38.91	q31.1	protein_coding	MLTK	Mitogen-activated protein kinase kinase kinase MLT [Source:UniProtKB/Swiss-Prot;Acc:Q9NYL2]
1862	ENSG00000091482	23129.1	-0.0284869	0.20563	-0.138535	0.889818	0.952984	chrX	21724090	21776281	1040	-	40.15	p22.12	protein_coding	SMPX	small muscle protein, X-linked [Source:HGNC Symbol;Acc:11122]
1863	ENSG00000091483	9060.58	-0.223541	0.160926	-1.38909	0.164806	0.383309	chr1	241660903	241683061	2142	-	36.87	q43	protein_coding	FH	fumarate hydratase [Source:HGNC Symbol;Acc:3700]
1864	ENSG00000091490	479.379	0.0714065	0.212388	0.336207	0.736715	0.875001	chr4	25749055	25865382	7483	-	43.64	p15.2	protein_coding	SEL1L3	sel-1 suppressor of lin-12-like 3 (C. elegans) [Source:HGNC Symbol;Acc:29108]
1865	ENSG00000091513	110.947	1.0524	0.406685	2.58776	0.00966012	0.0573045	chr3	133464800	133497850	8565	+	45.21	q22.1	protein_coding	TF	transferrin [Source:HGNC Symbol;Acc:11740]
1866	ENSG00000091527	22278.5	-0.0588156	0.0907232	-0.648297	0.516793	0.735228	chr3	133292574	133309105	4367	+	42.4	q22.1	protein_coding	CDV3	CDV3 homolog (mouse) [Source:HGNC Symbol;Acc:26928]
1867	ENSG00000091536	225.664	1.20747	0.388014	3.11193	0.00185871	0.0174694	chr17	18012020	18083116	19117	+	55.19	p11.2	protein_coding	MYO15A	myosin XVA [Source:HGNC Symbol;Acc:7594]
1868	ENSG00000091542	18709	-0.555128	0.189829	-2.92435	0.00345172	0.0273839	chr17	18086392	18113268	3190	+	50.24	p11.2	protein_coding	ALKBH5	alkB, alkylation repair homolog 5 (E. coli) [Source:HGNC Symbol;Acc:25996]
1869	ENSG00000091592	1564.55	0.0101181	0.144675	0.0699368	0.944244	0.97615	chr17	5402747	5522744	12811	-	46.74	p13.2	protein_coding	NLRP1	NLR family, pyrin domain containing 1 [Source:HGNC Symbol;Acc:14374]
1870	ENSG00000091622	247.197	0.262539	0.189239	1.38734	0.165338	0.383927	chr17	6354584	6459814	10609	-	51.99	p13.2	protein_coding	PITPNM3	PITPNM family member 3 [Source:HGNC Symbol;Acc:21043]
1871	ENSG00000091640	5469.74	-0.333146	0.187976	-1.77228	0.0763474	0.235028	chr17	4862521	4871167	2831	-	51.65	p13.2	protein_coding	SPAG7	sperm associated antigen 7 [Source:HGNC Symbol;Acc:11216]
1872	ENSG00000091651	133.519	-0.219976	0.249058	-0.883234	0.37711	0.622304	chr16	46723555	46732306	4309	+	44.16	q11.2	protein_coding	ORC6	origin recognition complex, subunit 6 [Source:HGNC Symbol;Acc:17151]
1873	ENSG00000091656	6189.6	-0.353976	0.131202	-2.69795	0.00697678	0.0453989	chr8	77593454	77779521	15696	+	36.38	q21.11	protein_coding	ZFHX4	zinc finger homeobox 4 [Source:HGNC Symbol;Acc:30939]
1874	ENSG00000091704	50.6696	1.43293	0.364912	3.92678	8.61e-05	0.00177503	chr7	130020180	130027955	2921	+	56.16	q32.2	protein_coding	CPA1	carboxypeptidase A1 (pancreatic) [Source:HGNC Symbol;Acc:2296]
1875	ENSG00000091732	1747.79	-0.282054	0.101196	-2.7872	0.00531656	0.0373811	chr7	129658126	129691291	3011	-	44.46	q32.2	protein_coding	ZC3HC1	zinc finger, C3HC-type containing 1 [Source:HGNC Symbol;Acc:29913]
1876	ENSG00000091831	2515.43	-0.514771	0.209018	-2.46281	0.0137853	0.0738484	chr6	151977826	152450754	13629	+	39.66	q25.1	protein_coding	ESR1	estrogen receptor 1 [Source:HGNC Symbol;Acc:3467]
1877	ENSG00000091844	243.428	1.32268	0.259347	5.10004	3.4e-07	2.09e-05	chr6	153325594	153452384	7899	-	37.43	q25.2	protein_coding	RGS17	regulator of G-protein signaling 17 [Source:HGNC Symbol;Acc:14088]
1878	ENSG00000091879	1360.43	0.36858	0.218098	1.68997	0.0910328	0.262476	chr8	6357172	6420930	6784	-	40.71	p23.1	protein_coding	ANGPT2	angiopoietin 2 [Source:HGNC Symbol;Acc:485]
1879	ENSG00000091947	1354.56	-0.310095	0.133001	-2.33151	0.0197263	0.0945272	chr17	42088556	42101314	3029	-	49.94	q21.31	protein_coding	TMEM101	transmembrane protein 101 [Source:HGNC Symbol;Acc:28653]
1880	ENSG00000091972	274.589	0.255589	0.223288	1.14467	0.252348	0.494687	chr3	112051194	112081659	2991	+	38.61	q13.2	protein_coding	CD200	CD200 molecule [Source:HGNC Symbol;Acc:7203]
1881	ENSG00000091986	5896.06	1.07198	0.546411	1.96186	0.0497787	0.177924	chr3	112323407	112368377	5305	-	40.42	q13.2	protein_coding	CCDC80	coiled-coil domain containing 80 [Source:HGNC Symbol;Acc:30649]
1882	ENSG00000092009	59.7334	1.08889	0.440919	2.46959	0.0135269	0.0728329	chr14	24974559	24977471	937	-	51.56	q12	protein_coding	CMA1	chymase 1, mast cell [Source:HGNC Symbol;Acc:2097]
1883	ENSG00000092010	2989	0.204623	0.206501	0.990908	0.32173	0.569562	chr14	24605367	24608176	1781	+	57.4	q12	protein_coding	PSME1	proteasome (prosome, macropain) activator subunit 1 (PA28 alpha) [Source:HGNC Symbol;Acc:9568]
1884	ENSG00000092020	1556.1	-0.155201	0.106334	-1.45957	0.144409	0.352903	chr14	35554673	35591723	3863	-	42.2	q13.2	protein_coding	PPP2R3C	protein phosphatase 2, regulatory subunit B'', gamma [Source:HGNC Symbol;Acc:17485]
1885	ENSG00000092036	1061.05	0.440197	0.131657	3.34351	0.000827247	0.00973556	chr14	23415437	23426370	2539	-	45.59	q11.2	protein_coding	HAUS4	HAUS augmin-like complex, subunit 4 [Source:HGNC Symbol;Acc:20163]	MI0017340	hsa-mir-4707
1886	ENSG00000092051	23.5601	-0.533446	0.346678	-1.53873	0.123869	0.31944	chr14	24037244	24048009	5307	-	56.69	q11.2	protein_coding	JPH4	junctophilin 4 [Source:HGNC Symbol;Acc:20156]
1887	ENSG00000092054	1.67608e+06	-0.47471	0.397231	-1.19505	0.232068	0.470469	chr14	23881947	23904927	6087	-	53.09	q11.2	protein_coding	MYH7	myosin, heavy chain 7, cardiac muscle, beta [Source:HGNC Symbol;Acc:7577]
1888	ENSG00000092068	772.076	-0.802596	0.155679	-5.15545	2.53e-07	1.66e-05	chr14	23594504	23652883	5942	-	47.13	q11.2	protein_coding	SLC7A8	solute carrier family 7 (amino acid transporter light chain, L system), member 8 [Source:HGNC Symbol;Acc:11066]
1889	ENSG00000092094	2269.39	0.0784868	0.152481	0.514732	0.60674	0.79622	chr14	20914570	20923264	5041	-	45.15	q11.2	protein_coding	OSGEP	O-sialoglycoprotein endopeptidase [Source:HGNC Symbol;Acc:18028]
1890	ENSG00000092096	255.698	0.59021	0.211549	2.78994	0.00527179	0.0371142	chr14	23815515	23822121	4278	-	57.86	q11.2	protein_coding	SLC22A17	solute carrier family 22, member 17 [Source:HGNC Symbol;Acc:23095]
1891	ENSG00000092098	3432.88	-0.556222	0.219025	-2.53954	0.0111	0.0633194	chr14	24615892	24629870	4982	+	52.92	q12	protein_coding	RNF31	ring finger protein 31 [Source:HGNC Symbol;Acc:16031]
1892	ENSG00000092108	3941.61	0.113426	0.0911968	1.24375	0.21359	0.448026	chr14	31091318	31205018	6571	+	36.17	q12	protein_coding	SCFD1	sec1 family domain containing 1 [Source:HGNC Symbol;Acc:20726]
1893	ENSG00000092140	1479.91	0.296204	0.128303	2.30864	0.0209637	0.0985922	chr14	31028329	31089269	10025	+	35.48	q12	protein_coding	G2E3	G2/M-phase specific E3 ubiquitin protein ligase [Source:HGNC Symbol;Acc:20338]
1894	ENSG00000092148	56692.1	-0.375562	0.111846	-3.35783	0.000785556	0.00939898	chr14	31569318	31677010	12417	-	39.35	q12	protein_coding	HECTD1	HECT domain containing E3 ubiquitin protein ligase 1 [Source:HGNC Symbol;Acc:20157]
1895	ENSG00000092199	15321.6	0.243474	0.1152	2.11348	0.0345595	0.138662	chr14	21677295	21737653	7315	-	39.78	q11.2	protein_coding	HNRNPC	heterogeneous nuclear ribonucleoprotein C (C1/C2) [Source:HGNC Symbol;Acc:5035]
1896	ENSG00000092200	37.0638	0.154722	0.234148	0.660786	0.50875	0.729497	chr14	21756098	21819460	5494	+	44.4	q11.2	protein_coding	RPGRIP1	retinitis pigmentosa GTPase regulator interacting protein 1 [Source:HGNC Symbol;Acc:13436]
1897	ENSG00000092201	4741.59	0.11382	0.120928	0.941217	0.346594	0.594241	chr14	21819631	21852425	7151	-	40.41	q11.2	protein_coding	SUPT16H	suppressor of Ty 16 homolog (S. cerevisiae) [Source:HGNC Symbol;Acc:11465]
1898	ENSG00000092203	7222.38	-0.28687	0.0992941	-2.88909	0.00386359	0.0297018	chr14	21944756	21967319	7076	+	43.84	q11.2	protein_coding	TOX4	TOX high mobility group box family member 4 [Source:HGNC Symbol;Acc:20161]
1899	ENSG00000092208	608.799	0.290166	0.137417	2.11157	0.0347232	0.139179	chr14	39583427	39606177	2532	+	39.65	q21.1	protein_coding	GEMIN2	gem (nuclear organelle) associated protein 2 [Source:HGNC Symbol;Acc:10884]
1900	ENSG00000092295	54.0209	0.329203	0.330084	0.997331	0.318604	0.566256	chr14	24718320	24733638	3735	-	54.94	q12	protein_coding	TGM1	transglutaminase 1 [Source:HGNC Symbol;Acc:11777]
1901	ENSG00000092330	1940.2	0.0962966	0.142418	0.676153	0.498943	0.722753	chr14	24708849	24711880	2712	-	53.3	q12	protein_coding	TINF2	TERF1 (TRF1)-interacting nuclear factor 2 [Source:HGNC Symbol;Acc:11824]
1902	ENSG00000092377	189.806	-0.225424	2.14408	-0.105138	0.916266	0.964155	chrY	6778727	6959724	2407	+	43.32	p11.2	protein_coding	TBL1Y	transducin (beta)-like 1, Y-linked [Source:HGNC Symbol;Acc:18502]
1903	ENSG00000092421	2603	0.0373589	0.1933	0.193269	0.846748	0.9326	chr5	115779312	115910630	10956	-	40.58	q23.1	protein_coding	SEMA6A	sema domain, transmembrane domain (TM), and cytoplasmic domain, (semaphorin) 6A [Source:HGNC Symbol;Acc:10738]
1904	ENSG00000092439	6232.75	0.0908003	0.119001	0.763019	0.445452	0.681282	chr15	50844670	50979012	9198	-	38.89	q21.2	protein_coding	TRPM7	transient receptor potential cation channel, subfamily M, member 7 [Source:HGNC Symbol;Acc:17994]
1905	ENSG00000092445	289.183	0.661441	0.239785	2.75847	0.00580718	0.039766	chr15	41849873	41871536	6697	+	54.42	q15.1	protein_coding	TYRO3	TYRO3 protein tyrosine kinase [Source:HGNC Symbol;Acc:12446]
1906	ENSG00000092470	130.305	0.091418	0.183506	0.498174	0.618362	0.80332	chr15	44119161	44160617	4078	+	41.87	q15.3	protein_coding	WDR76	WD repeat domain 76 [Source:HGNC Symbol;Acc:25773]
1907	ENSG00000092529	53851.2	-0.86672	0.316774	-2.73608	0.00621761	0.0417813	chr15	42640301	42704516	5129	+	46.11	q15.1	protein_coding	CAPN3	calpain 3, (p94) [Source:HGNC Symbol;Acc:1480]
1908	ENSG00000092531	4330.63	0.139095	0.0953743	1.45841	0.144728	0.353401	chr15	42783431	42837547	5893	+	42.26	q15.1	protein_coding	SNAP23	synaptosomal-associated protein, 23kDa [Source:HGNC Symbol;Acc:11131]
1909	ENSG00000092607	14437	-0.470254	0.237437	-1.98054	0.0476425	0.17264	chr1	119425669	119532179	3806	-	41.12	p12	protein_coding	TBX15	T-box 15 [Source:HGNC Symbol;Acc:11594]
1910	ENSG00000092621	181.834	0.054055	0.284806	0.189795	0.849469	0.933931	chr1	120202421	120286838	5622	+	44.18	p12	protein_coding	PHGDH	phosphoglycerate dehydrogenase [Source:HGNC Symbol;Acc:8923]
1911	ENSG00000092758	101.706	-0.525474	0.292293	-1.79776	0.0722145	0.226496	chr20	61447596	61472511	4831	+	61.84	q13.33	protein_coding	COL9A3	collagen, type IX, alpha 3 [Source:HGNC Symbol;Acc:2219]
1912	ENSG00000092820	3973.03	1.78179	0.250181	7.12202	1.06e-12	2.86e-10	chr6	159186773	159240444	3336	-	46.17	q25.3	protein_coding	EZR	ezrin [Source:HGNC Symbol;Acc:12691]
[truncated: 34,066 more rows]
