# Supplementary material for: Transcriptomic analysis of human ALS skeletal muscle reveals a disease-specific pattern of dysregulated circRNAs
Source: Aging (Albany NY). 2022 Dec 30;14(24):9832–59. doi: 10.18632/aging.204450 (PMC9831722; doi:10.18632/aging.204450)
Supplement: Supplementary File 3 [file aging-14-204450-s003.xlsx]

## Sheet: Dif. expressed circRNAs
														Supplementary File 3. RNA-seq analysis of circRNAs in this study.
Circ_ID	baseMean	log2FoldChange	lfcSE	stat	pvalue	padj	ID_number	chromosome	start	end	score	strand	read_number_1_HM3_Normal_3_S1_S1_fromRNAdb_circRNA	read_number_10_HM20_Normal_10_S10_S10_fromRNAdb_circRNA	read_number_2_HM6_Normal_6_S2_S2_fromRNAdb_circRNA	read_number_3_HM7_Normal_7_S3_S3_fromRNAdb_circRNA	read_number_4_HM12_ALS_5_S4_S4_fromRNAdb_circRNA	read_number_5_HM13_ALS_6_S5_S5_fromRNAdb_circRNA	read_number_6_HM14_ALS_7_S6_S6_fromRNAdb_circRNA	read_number_7_HM15_ALS_8_S7_S7_fromRNAdb_circRNA	read_number_8_HM17_ALS_10_S8_S8_fromRNAdb_circRNA	read_number_9_HM19_Normal_9_S9_S9_fromRNAdb_circRNA	thickStart	thickEnd	itemRgb	exon_count	exon_sizes	exon_offsets	circ_type	gene_name	isoform_name	exon_intron_index	flanking_intron
hsa_circ_0007778	3.14574	5.17941	2.11319	2.451	0.0142461	0.996171	2287	chr10	70246900	70266475	0	-	0	0	0	0	9	8	0	4	14	0	70246900	70246900	0,0,0	6	69,163,67,122,64,134	0,1323,5988,6305,16488,19441	circRNA	SLC25A16	ENST00000609923	8,7,6,5,4,3	chr10:70243345-70246900|chr10:70266475-70276507
hsa_circ_0000119	3.7723	4.82434	2.05313	2.34975	0.0187862	0.996171	1277	chr1	117944807	117984947	0	+	0	1	0	0	1	1	0	13	29	0	117944807	117944807	0,0,0	5	256,97,119,81,95	0,3363,12527,18383,40045	circRNA	MAN1A2	ENST00000356554	2,3,4,5,6	chr1:117911107-117944807|chr1:117984947-118003110
hsa_circ_0120912	3.03131	4.49664	2.23114	2.0154	0.0438628	0.996171	1136	chr2	71788881	71791343	0	+	0	1	0	0	0	12	0	5	17	0	71788881	71788881	0,0,0	2	193156	0,2306	circRNA	DYSF	ENST00000409582	23,24	chr2:71783201-71788881|chr2:71791343-71795080
hsa_circ_0000417	3.31944	3.78787	2.24572	1.68671	0.0916594	0.996171	2203	chr12	69644908	69656342	0	+	0	0	0	0	8	12	0	13	0	2	69644908	69644908	0,0,0	8	2.10104e+23	0,1922,5568,6603,7461,8299,8915,11244	circRNA	CPSF6	ENST00000435070	2,3,4,5,6,7,8,9	chr12:69633486-69644908|chr12:69656342-69663291
hsa_circ_0005552	2.77848	3.53192	2.3923	1.47637	0.139844	0.996171	1133	chr2	63206322	63223901	0	+	0	1	0	0	18	0	0	8	0	1	63206322	63206322	0,0,0	5	148125139107124	0,11528,14342,14683,17455	circRNA	EHBP1	ENST00000405015	15,16,17,18,19	chr2:63182795-63206322|chr2:63223901-63264669
hsa_circ_0000567	4.4474	3.48528	1.79725	1.93924	0.0524726	0.996171	100	chr14	99924615	99932150	0	-	4	1	0	0	21	1	21	7	0	0	99924615	99924615	0,0,0	5	257,73,149,93,111	0,834,2913,5207,7424	circRNA	SETD3	ENST00000331768	6,5,4,3,2	chr14:99880271-99924615|chr14:99932150-99947064
hsa_circ_0001451	9.2813	3.3344	1.60406	2.07872	0.037643	0.996171	1027	chr4	153332454	153333681	0	-	0	6	0	0	38	30	22	5	0	1	153332454	153332454	0,0,0	2	570,50	0,1177	circRNA	FBXW7	ENST00000603548	3,2	chr4:153271276-153332454|chr4:153333681-153456092
hsa_circ_0002566	4.17694	3.05763	2.10516	1.45244	0.146378	0.996171	837	chr7	64004084	64004810	0	-	0	4	0	0	15	13	0	13	0	0	64004084	64004084	0,0,0	2	96127	0,599	circRNA	ZNF680	ENST00000309683	3,2	chr7:63982878-64004084|chr7:64004810-64023302
hsa_circ_0005615	1.44804	2.95455	2.74638	1.0758	0.282018	0.996171	72	chr16	68155889	68157024	0	+	2	0	0	0	0	1	0	3	12	0	68155889	68155889	0,0,0	1	1135	0	circRNA	NFATC3	ENST00000553077	2	chr16:68119083-68155889|chr16:68157024-68160350
hsa_circ_0002972	1.56613	2.90802	2.71241	1.07212	0.283667	0.996171	191	chr5	176963358	176966148	0	-	1	1	0	0	11	3	0	0	0	0	176963358	176963358	0,0,0	3	388235243	0,1515,2547	circRNA	FAM193B	ENST00000514747	4,3,2	chr5:176959642-176963358|chr5:176966148-176981249
chr4:114376881-114421667	5.11287	2.80166	2.03157	1.37906	0.167876	0.996171	1713	chr4	114376881	114421667	0	-	0	0	8	0	14	0	0	11	26	0	114376881	114376881	0,0,0	5	96,229,95,76,49	0,1609,4421,9803,44737	circRNA	CAMK2D	ENST00000394526	19,18,17,16,15	chr4:114375671-114376881|chr4:114421667-114429391
hsa_circ_0008812	3.91173	2.52485	1.75856	1.43574	0.151076	0.996171	303	chr9	110062421	110074018	0	+	8	1	0	0	8	13	13	7	0	0	110062421	110062421	0,0,0	4	82,80,269,56	0,1894,6238,11541	circRNA	RAD23B	ENST00000358015	2,3,4,5	chr9:110045976-110062421|chr9:110074018-110081032
hsa_circ_0001016	6.09178	2.47419	1.68824	1.46554	0.142773	0.996171	1131	chr2	61749745	61753656	0	-	0	4	0	6	22	0	22	1	17	0	61749745	61749745	0,0,0	2	73102	0,3809	circRNA	XPO1	ENST00000401558	4,3	chr2:61729445-61749745|chr2:61753656-61760906
hsa_circ_0004113	0.768978	2.34466	3.06974	0.763799	0.444987	0.996171	1054	chr3	66293626	66313803	0	+	0	1	0	0	2	0	1	5	0	0	66293626	66293626	0,0,0	3	110,105,48	0,18848,20129	circRNA	SLC25A26	ENST00000354883	4,5,6	chr3:66287124-66293626|chr3:66313803-66396787
hsa_circ_0000231	3.32599	2.31056	2.24172	1.03071	0.302676	0.996171	499	chr10	32197099	32199491	0	-	0	5	0	0	19	3	0	7	0	0	32197099	32197099	0,0,0	2	755,39	0,2353	circRNA	ARHGAP12	ENST00000375250	3,2	chr10:32150586-32197099|chr10:32199491-32217610
hsa_circ_0073517	2.65125	2.28881	2.38097	0.961296	0.336403	0.996171	969	chr5	107521817	107684231	0	-	0	4	0	0	5	0	0	1	19	0	107521817	107521817	0,0,0	3	131108132	0,38004,162282	circRNA	FBXL17	ENST00000359660	6,5,4	chr5:107356702-107521817|chr5:107684231-107700438
hsa_circ_0001423	6.81494	2.21409	1.44768	1.52941	0.126163	0.996171	196	chr4	87967317	87968746	0	+	13	2	0	3	19	18	18	12	0	0	87967317	87967317	0,0,0	2	121900	0,529	circRNA	AFF1	ENST00000395146	3,4	chr4:87869723-87967317|chr4:87968746-88005271
hsa_circ_0005465	3.72911	2.04108	2.185	0.934132	0.350236	0.996171	25	chr12	122861935	122865105	0	-	5	4	0	0	12	0	0	0	21	0	122861935	122861935	0,0,0	2	572191	0,2979	circRNA	CLIP1	ENST00000361654	3,2	chr12:122848654-122861935|chr12:122865105-122907067
hsa_circ_0005171	2.50029	1.99399	2.40923	0.827647	0.407871	0.996171	1828	chr9	108467877	108484902	0	+	0	0	4	0	7	14	0	0	0	1	108467877	108467877	0,0,0	3	157,185,88	0,15940,16937	circRNA	TMEM38B	ENST00000374692	2,3,4	chr9:108457053-108467877|chr9:108484902-108510353
hsa_circ_0001369	3.90058	1.98269	1.8515	1.07085	0.284235	0.996171	1094	chr3	183368083	183369064	0	+	0	4	2	0	14	8	0	0	11	1	183368083	183368083	0,0,0	1	981	0	circRNA	KLHL24	ENST00000242810	3	chr3:183361330-183368083|chr3:183369064-183381245
hsa_circ_0000099	6.85071	1.94272	1.73111	1.12223	0.261763	0.996171	1267	chr1	104108056	104118162	0	+	0	1	7	0	5	17	0	43	0	4	104108056	104108056	0,0,0	8	1.60214e+23	0,6122,6675,7628,8273,8825,9788,10006	circRNA	AMY2B	ENST00000361355	2,3,4,5,6,7,8,9	chr1:104097731-104108056|chr1:104118162-104120111
chr2:233587263-233589401	1.65909	1.91185	2.6521	0.720883	0.470981	0.996171	1208	chr2	233587263	233589401	0	+	0	3	0	0	1	10	0	4	0	0	233587263	233587263	0,0,0	2	105118	0,2020	circRNA	GIGYF2	ENST00000427233	4,5	chr2:233568199-233587263|chr2:233589401-233599864
hsa_circ_0004805	3.84659	1.90415	1.95881	0.972098	0.331002	0.996171	51	chr17	4186092	4210418	0	-	3	0	0	8	0	5	0	15	17	0	4186092	4186092	0,0,0	4	124,179,98,103	0,6432,13919,24223	circRNA	UBE2G1	ENST00000396981	5,4,3,2	chr17:4175811-4186092|chr17:4210418-4269565
hsa_circ_0004912	3.82024	1.85203	2.24346	0.825524	0.409074	0.996171	2032	chr3	52446826	52448603	0	+	0	0	0	1	8	0	0	0	25	4	52446826	52446826	0,0,0	3	110,53,92	0,1185,1685	circRNA	PHF7	ENST00000327906	2,3,4	chr3:52445263-52446826|chr3:52448603-52453848
chr12:57637693-57637870	2.98838	1.81216	2.34235	0.77365	0.439138	0.996171	1447	chr12	57637724	57637870	0	-	0	0	6	0	0	23	0	3	0	1	57637724	57637724	0,0,0	1	146	0	ciRNA	STAC3	ENST00000554578	10	chr12:57637693-57637870
hsa_circ_0004870	4.22635	1.80786	2.14382	0.843292	0.399065	0.996171	2469	chr20	34302106	34313077	0	-	0	0	0	0	14	12	0	9	0	5	34302106	34302106	0,0,0	5	205,66,138,153,118	0,2555,7555,10385,10853	circRNA	RBM39	ENST00000463004	10,9,8,7,6	chr20:34301018-34302106|chr20:34313077-34317233
hsa_circ_0005806	2.02809	1.8068	2.47273	0.73069	0.464969	0.996171	610	chr16	30675535	30677862	0	+	0	4	0	0	6	5	8	0	0	0	30675535	30675535	0,0,0	6	302,206,45,96,69,30	0,500,820,1091,1423,2297	circRNA	FBRS	ENST00000356166	7,8,9,10,11,12	chr16:30674180-30675535|chr16:30677862-30678239
hsa_circ_0002538	5.06863	1.76235	1.77157	0.994794	0.319836	0.996171	198	chr4	88116475	88116842	0	-	10	2	0	0	7	0	5	37	0	2	88116475	88116475	0,0,0	1	367	0	circRNA	KLHL8	ENST00000273963	2	chr4:88106951-88116475|chr4:88116842-88141569
hsa_circ_0007099	3.28493	1.66949	2.25552	0.740179	0.459191	0.996171	87	chr15	89656955	89659752	0	+	4	0	0	0	15	0	0	12	0	3	89656955	89656955	0,0,0	2	100200	0,2597	circRNA	ABHD2	ENST00000569411	2,3	chr15:89630747-89656955|chr15:89659752-89694907
hsa_circ_0002245	4.53338	1.63454	1.77474	0.921004	0.357049	0.996171	881	chr6	17507399	17514185	0	+	0	3	5	0	12	12	0	14	0	2	17507399	17507399	0,0,0	3	144,86,106	0,472,6680	circRNA	CAP2	ENST00000229922	5,6,7	chr6:17463304-17507399|chr6:17514185-17539499
chr6:123696749-123714822	6.47649	1.59654	1.80254	0.885716	0.375771	0.996171	177	chr6	123696749	123714822	0	-	12	0	12	0	0	35	10	14	0	0	123696749	123696749	0,0,0	7	27,27,33,21,30,30,54	0,2111,2261,5765,6513,12917,18019	circRNA	TRDN	ENST00000398178	19,18,17,16,15,14,13	chr6:123687327-123696749|chr6:123714822-123759207
hsa_circ_0056018	1.38112	1.56647	2.75834	0.567904	0.5701	0.996171	1161	chr2	110919179	110920709	0	-	0	3	0	0	3	6	3	0	0	0	110919179	110919179	0,0,0	2	95,85	0,1445	circRNA	NPHP1	ENST00000393272	10,9	chr2:110917832-110919179|chr2:110920709-110922096
hsa_circ_0001439	3.78304	1.56203	1.85334	0.842821	0.399329	0.996171	203	chr4	129913321	129925031	0	-	8	1	3	2	0	16	22	0	0	0	129913321	129913321	0,0,0	4	71,66,123,136	0,5707,7505,11574	circRNA	SCLT1	ENST00000281142	9,8,7,6	chr4:129891623-129913321|chr4:129925031-129960195
hsa_circ_0000605	8.37051	1.54485	1.49007	1.03677	0.299845	0.996171	634	chr15	59204761	59209198	0	-	0	3	6	0	33	8	14	15	0	7	59204761	59204761	0,0,0	3	48,198,65	0,936,4372	circRNA	SLTM	ENST00000380516	5,4,3	chr15:59193486-59204761|chr15:59209198-59224554
hsa_circ_0003270	2.89161	1.52381	2.31437	0.658414	0.510272	0.996171	2894	chr9	128099296	128099870	0	+	0	0	0	0	2	0	15	12	0	4	128099296	128099296	0,0,0	2	78371	0,203	circRNA	GAPVD1	ENST00000497580	14,15	chr9:128094908-128099296|chr9:128099870-128103455
hsa_circ_0008501	1.23654	1.5229	2.8744	0.529814	0.596241	0.996171	1218	chr1	8601272	8674745	0	-	0	2	0	1	0	6	0	5	0	0	8601272	8601272	0,0,0	4	105,97,106,126	0,15261,16204,73347	circRNA	RERE	ENST00000337907	8,7,6,5	chr1:8568734-8601272|chr1:8674745-8684368
hsa_circ_0001368	3.06507	1.52154	1.99572	0.762404	0.445819	0.996171	1737	chr3	183361267	183390272	0	+	0	0	2	1	8	1	0	17	0	3	183361267	183361267	0,0,0	6	6.39812e+16	0,6816,19978,21441,27554,28816	circRNA	KLHL24	ENST00000242810	2,3,4,5,6,7	chr3:183353581-183361267|chr3:183390272-183396873
hsa_circ_0002158	1.92314	1.47703	2.30834	0.63987	0.522257	0.996171	1217	chr1	8601272	8617582	0	-	0	1	5	0	3	0	9	7	0	0	8601272	8601272	0,0,0	3	105,97,106	0,15261,16204	circRNA	RERE	ENST00000337907	8,7,6	chr1:8568734-8601272|chr1:8617582-8674619
hsa_circ_0001900	3.5117	1.45517	1.88448	0.772189	0.440003	0.996171	1373	chr9	138773478	138774924	0	-	0	2	0	2	4	0	0	12	14	3	138773478	138773478	0,0,0	2	162263	0,1183	circRNA	CAMSAP1	ENST00000389532	3,2	chr9:138758382-138773478|chr9:138774924-138798845
hsa_circ_0084615	2.18633	1.42668	2.46989	0.57763	0.563514	0.996171	1393	chr8	62593526	62596747	0	-	0	2	0	0	0	0	16	7	0	2	62593526	62593526	0,0,0	2	69150	0,3071	circRNA	ASPH	ENST00000541428	3,2	chr8:62566219-62593526|chr8:62596747-62602231
hsa_circ_0000835	6.38293	1.41376	1.67183	0.845636	0.397756	0.996171	119	chr18	19345732	19359646	0	+	2	0	11	0	32	1	0	15	1	4	19345732	19345732	0,0,0	5	172,130,105,67,205	0,2851,7852,12331,13709	circRNA	MIB1	ENST00000578646	2,3,4,5,6	chr18:19285084-19345732|chr18:19359646-19371295
hsa_circ_0004471	3.97414	1.40282	2.0187	0.694911	0.487111	0.996171	1149	chr2	101643844	101650220	0	-	0	3	0	0	7	0	0	24	3	4	101643844	101643844	0,0,0	6	69,99,130,286,118,215	0,665,920,2108,4885,6161	circRNA	TBC1D8	ENST00000376840	15,14,13,12,11,10	chr2:101638983-101643844|chr2:101650220-101652479
hsa_circ_0007385	3.43147	1.39799	2.24924	0.62154	0.534245	0.996171	2728	chr2	32142994	32157204	0	-	0	0	0	0	2	0	24	9	0	5	32142994	32142994	0,0,0	3	112,113,69	0,2872,14141	circRNA	MEMO1	ENST00000295065	5,4,3	chr2:32117203-32142994|chr2:32157204-32168370
hsa_circ_0000896	5.72485	1.38917	1.89515	0.733011	0.463552	0.996171	108	chr19	13039155	13039661	0	-	12	0	2	0	0	23	32	0	0	4	13039155	13039155	0,0,0	3	116,129,93	0,193,413	circRNA	FARSA	ENST00000588025	8,7,6	chr19:13035988-13039155|chr19:13039661-13041036
hsa_circ_0002484	12.5431	1.30059	1.36197	0.954933	0.339611	0.996171	477	chr11	130130750	130131824	0	-	0	5	7	0	54	11	20	11	2	13	130130750	130130750	0,0,0	1	1074	0	circRNA	ZBTB44	ENST00000445008	2	chr11:130109791-130130750|chr11:130131824-130184269
hsa_circ_0001236	2.28079	1.27754	2.50803	0.509382	0.610485	0.996171	1609	chr22	41738532	41739580	0	+	0	0	1	5	0	0	0	0	19	1	41738532	41738532	0,0,0	2	100162	0,886	circRNA	ZC3H7B	ENST00000352645	12,13	chr22:41737150-41738532|chr22:41739580-41742006
hsa_circ_0001020	6.94566	1.27108	1.72475	0.736969	0.461141	0.996171	238	chr2	64083439	64085070	0	+	1	4	0	0	0	14	39	14	0	8	64083439	64083439	0,0,0	2	128108	0,1523	circRNA	UGP2	ENST00000394417	2,3	chr2:64068366-64083439|chr2:64085070-64109599
hsa_circ_0000711	3.46778	1.27065	2.24117	0.566961	0.570741	0.996171	616	chr16	68155889	68160513	0	+	0	4	0	0	0	0	26	0	9	3	68155889	68155889	0,0,0	2	1135163	0,4461	circRNA	NFATC3	ENST00000553077	2,3	chr16:68119083-68155889|chr16:68160513-68191771
hsa_circ_0007883	7.46596	1.23487	1.83957	0.671278	0.502043	0.996171	2018	chr4	73956383	73958017	0	-	0	0	0	11	5	20	0	37	0	7	73956383	73956383	0,0,0	1	1634	0	circRNA	ANKRD17	ENST00000358602	29	chr4:73951163-73956383|chr4:73958017-73959795
hsa_circ_0001053	3.62045	1.21258	1.88086	0.644693	0.519126	0.996171	1147	chr2	100078957	100081447	0	-	0	4	0	1	13	0	6	10	0	3	100078957	100078957	0,0,0	2	127,64	0,2426	circRNA	REV1	ENST00000393445	3,2	chr2:100065966-100078957|chr2:100081447-100106278
chr15:63988322-64008672	3.70978	1.20191	2.20435	0.545243	0.585586	0.996171	1553	chr15	63988322	64008672	0	-	0	0	7	0	12	0	21	0	0	3	63988322	63988322	0,0,0	6	216,269,52,121,313,172	0,2604,10656,16651,17229,20178	circRNA	HERC1	ENST00000443617	27,26,25,24,23,22	chr15:63987093-63988322|chr15:64008672-64010772
hsa_circ_0005328	8.20948	1.16978	1.47374	0.793755	0.427338	0.996171	935	chr6	163876310	163899928	0	+	0	2	7	22	22	12	0	12	17	0	163876310	163876310	0,0,0	2	143117	0,23501	circRNA	QKI	ENST00000361758	2,3	chr6:163836367-163876310|chr6:163899928-163956013
hsa_circ_0006629	1.00831	1.12568	3.02415	0.37223	0.709721	0.996171	456	chr11	85685750	85695016	0	-	0	2	1	0	0	0	0	8	1	0	85685750	85685750	0,0,0	7	105,60,24,100,31,132,108	0,1915,3362,6421,7037,7164,9158	circRNA	PICALM	ENST00000532317	19,18,17,16,15,14,13	chr11:85670103-85685750|chr11:85695016-85707868
hsa_circ_0000296	3.45297	1.12119	2.01588	0.55618	0.578088	0.996171	429	chr11	46098304	46113774	0	-	0	4	0	8	8	12	0	6	0	0	46098304	46098304	0,0,0	4	66,33,137,41	0,2380,7412,15429	circRNA	PHF21A	ENST00000257821	5,4,3,2	chr11:46001517-46098304|chr11:46113774-46142485
hsa_circ_0006501	5.60631	1.09793	1.92763	0.569575	0.568966	0.996171	152	chr7	101870646	101870949	0	+	2	0	9	0	14	26	0	0	0	5	101870646	101870646	0,0,0	1	303	0	circRNA	CUX1	ENST00000360264	21	chr7:101848450-101870646|chr7:101870949-101877331
chr3:37132957-37138151	4.41437	1.0952	2.20335	0.497058	0.619148	0.996171	210	chr3	37132957	37138151	0	-	1	0	0	0	0	24	0	10	0	7	37132957	37132957	0,0,0	3	72,117,45	0,3325,5149	circRNA	LRRFIP2	ENST00000421307	19,18,17	chr3:37125297-37132957|chr3:37138151-37144414
hsa_circ_0000441	3.71878	1.09318	2.00832	0.544322	0.58622	0.996171	1460	chr12	116534473	116549317	0	-	0	0	3	0	11	0	14	6	0	5	116534473	116534473	0,0,0	2	84,85	0,14759	circRNA	MED13L	ENST00000281928	4,3	chr12:116460406-116534473|chr12:116549317-116675272
hsa_circ_0096442	3.7	1.08729	2.23676	0.486097	0.626898	0.996171	451	chr11	74570202	74574066	0	-	0	2	0	0	0	0	0	10	20	5	74570202	74570202	0,0,0	2	126,41	0,3823	circRNA	XRRA1	ENST00000340360	12,11	chr11:74563127-74570202|chr11:74574066-74617283
hsa_circ_0001246	3.28498	1.06258	2.09631	0.506882	0.612237	0.996171	790	chr22	46096161	46136418	0	+	0	1	0	0	7	10	0	7	0	5	46096161	46096161	0,0,0	6	97,159,81,166,109,170	0,2407,18131,29143,38449,40087	circRNA	ATXN10	ENST00000381061	3,4,5,6,7,8	chr22:46088958-46096161|chr22:46136418-46202838
hsa_circ_0024605	17.9174	1.04983	0.803928	1.30588	0.191594	0.996171	38	chr11	120276826	120280159	0	+	35	10	13	10	27	36	32	27	23	5	120276826	120276826	0,0,0	3	24,86,57	0,1620,3276	circRNA	ARHGEF12	ENST00000397843	2,3,4	chr11:120207984-120276826|chr11:120280159-120291461
chr4:169432573-169433563	1.70296	1.03482	2.5884	0.399793	0.689309	0.996171	2026	chr4	169432573	169433563	0	+	0	0	0	7	5	0	4	5	0	0	169432573	169432573	0,0,0	1	990	0	circRNA	PALLD	ENST00000261509	2	chr4:169418345-169432573|chr4:169433563-169589340
hsa_circ_0008319	1.08915	1.03239	3.02083	0.341756	0.732534	0.996171	630	chr15	43120125	43132631	0	-	0	1	1	0	0	0	0	9	0	1	43120125	43120125	0,0,0	3	105,141,74	0,2010,12432	circRNA	TTBK2	ENST00000267890	6,5,4	chr15:43109295-43120125|chr15:43132631-43164808
hsa_circ_0105987	7.93454	1.01493	1.65529	0.613145	0.539781	0.996171	1522	chr16	7629778	7657340	0	+	0	0	10	11	29	0	6	25	0	5	7629778	7629778	0,0,0	5	144,54,93,61,54	0,7470,15772,17594,27508	circRNA	RBFOX1	ENST00000550418	6,7,8,9,10	chr16:7568391-7629778|chr16:7657340-7680604
hsa_circ_0004276	1.5314	1.01097	2.70415	0.37386	0.708509	0.996171	1055	chr3	67546221	67559327	0	-	0	1	5	0	4	0	0	8	0	0	67546221	67546221	0,0,0	3	143,162,97	0,2336,13009	circRNA	SUCLG2	ENST00000493112	9,8,7	chr3:67451275-67546221|chr3:67559327-67568670
hsa_circ_0004276	3.63486	1.00937	1.80523	0.559138	0.576067	0.996171	1174	chr2	152408251	152410539	0	-	0	3	5	6	5	0	12	15	0	0	152408251	152408251	0,0,0	4	108105105198	0,934,1660,2090	circRNA	NEB	ENST00000409198	102,101,100,99	chr2:152406254-152408251|chr2:152410539-152411444
chr3:114069120-114070725	17.7611	1.00403	1.15816	0.866917	0.385988	0.996171	218	chr3	114069120	114070725	0	-	4	5	3	25	48	0	38	30	25	15	114069120	114069120	0,0,0	1	1605	0	circRNA	ZBTB20	ENST00000462705	11	chr3:114058273-114069120|chr3:114070725-114099063
hsa_circ_0006114	2.14147	1.00089	2.4832	0.403066	0.686899	0.996171	746	chr18	8076452	8088849	0	+	0	3	0	0	5	0	14	0	0	2	8076452	8076452	0,0,0	3	110202103	0,9216,12294	circRNA	PTPRM	ENST00000580170	9,10,11	chr18:8069992-8076452|chr18:8088849-8113483
hsa_circ_0003624	4.94444	0.999378	1.94612	0.513522	0.607586	0.996171	1334	chr9	33886878	33900269	0	+	0	7	11	0	4	0	0	34	3	0	33886878	33886878	0,0,0	2	87,98	0,13293	circRNA	UBE2R2	ENST00000263228	2,3	chr9:33817932-33886878|chr9:33900269-33911961
hsa_circ_0001017	3.56552	0.979465	2.04844	0.478152	0.632542	0.996171	1132	chr2	61749745	61761038	0	-	0	9	0	0	8	0	7	14	0	1	61749745	61749745	0,0,0	3	73102132	0,3809,11161	circRNA	XPO1	ENST00000401558	4,3,2	chr2:61729445-61749745|chr2:61761038-61764696
hsa_circ_0001445	17.5784	0.979194	1.14089	0.858269	0.390744	0.996171	205	chr4	144464661	144465125	0	+	2	22	5	20	38	0	28	32	41	7	144464661	144464661	0,0,0	2	149120	0,344	circRNA	SMARCA5	ENST00000283131	15,16	chr4:144461648-144464661|chr4:144465125-144465889
hsa_circ_0006665	2.46193	0.975329	2.21279	0.440769	0.65938	0.996171	490	chr10	15875628	15889942	0	-	0	1	2	7	10	0	0	8	0	0	15875628	15875628	0,0,0	6	80,74,115,174,61,80	0,913,3574,7796,9582,14234	circRNA	FAM188A	ENST00000477891	7,6,5,4,3,2	chr10:15863725-15875628|chr10:15889942-15902204
hsa_circ_0000906	8.76228	0.939185	1.74576	0.53798	0.590591	0.996171	713	chr19	16790794	16793319	0	+	0	4	3	17	0	0	0	3	65	5	16790794	16790794	0,0,0	3	157,185,88	0,413,2437	circRNA	TMEM38A	ENST00000187762	2,3,4	chr19:16772152-16790794|chr19:16793319-16797098
hsa_circ_0001329	4.38759	0.923289	2.04306	0.451915	0.65133	0.996171	1063	chr3	119219541	119222868	0	+	0	1	8	0	3	28	0	0	0	4	119219541	119219541	0,0,0	3	166,89,68	0,2837,3259	circRNA	TIMMDC1	ENST00000494664	2,3,4	chr3:119217774-119219541|chr3:119222868-119232487
chr10:126370175-126370948	1.80968	0.886599	2.62494	0.337759	0.735545	0.996171	48	chr10	126370175	126370948	0	-	2	3	0	0	0	0	0	15	0	1	126370175	126370175	0,0,0	1	773	0	circRNA	RP11-12J10.3	ENST00000494792	9	chr10:126307362-126370175|chr10:126370948-126384726
hsa_circ_0056280	2.83812	0.852681	2.17534	0.391976	0.695076	0.996171	1166	chr2	120885263	120903865	0	+	0	1	9	0	0	9	0	13	0	1	120885263	120885263	0,0,0	4	164,98,129,65	0,3930,15315,18537	circRNA	EPB41L5	ENST00000263713	17,18,19,20	chr2:120858390-120885263|chr2:120903865-120918456
hsa_circ_0009043	15.5027	0.84463	1.29329	0.653086	0.513701	0.996171	1137	chr2	72945231	72960247	0	-	0	6	16	16	57	22	0	17	9	12	72945231	72945231	0,0,0	4	205,46,91,48	0,12904,13052,14968	circRNA	EXOC6B	ENST00000272427	6,5,4,3	chr2:72802797-72945231|chr2:72960247-72968432
hsa_circ_0008732	1.83945	0.827207	2.40422	0.344065	0.730798	0.996171	1818	chr9	16727794	16738483	0	-	0	0	3	3	0	0	0	14	1	1	16727794	16727794	0,0,0	2	201126	0,10563	circRNA	BNC2	ENST00000380672	3,2	chr9:16583083-16727794|chr9:16738483-16870643
hsa_circ_0001788	4.72745	0.809933	1.75787	0.460746	0.644981	0.996171	306	chr8	37623043	37623873	0	+	2	8	9	0	17	0	14	5	0	0	37623043	37623043	0,0,0	3	108,36,76	0,185,754	circRNA	PROSC	ENST00000328195	2,3,4	chr8:37620276-37623043|chr8:37623873-37630272
hsa_circ_0000437	14.7917	0.80495	1.42361	0.565427	0.571783	0.996171	398	chr12	109046047	109048186	0	-	0	8	0	22	11	39	0	32	26	14	109046047	109046047	0,0,0	2	146105	0,2034	circRNA	CORO1C	ENST00000261401	8,7	chr12:109042796-109046047|chr12:109048186-109051079
hsa_circ_0001982	1.46876	0.773761	2.78804	0.277528	0.781375	0.996171	635	chr15	59323002	59323901	0	+	0	1	3	0	9	0	0	0	0	1	59323002	59323002	0,0,0	1	899	0	circRNA	RNF111	ENST00000348370	2	chr15:59280267-59323002|chr15:59323901-59344503
chr12:112757028-112757546	1.64022	0.763168	2.65258	0.287708	0.77357	0.996171	405	chr12	112757028	112757546	0	-	0	4	2	0	3	8	0	0	0	0	112757028	112757028	0,0,0	1	518	0	circRNA	HECTD4	ENST00000377560	2	chr12:112752350-112757028|chr12:112757546-112819755
hsa_circ_0001772	8.87687	0.759286	1.32353	0.573684	0.566182	0.996171	159	chr7	155465560	155473602	0	+	16	4	3	0	12	14	11	30	0	9	155465560	155465560	0,0,0	3	49,77,319	0,5741,7723	circRNA	RBM33	ENST00000287912	3,4,5	chr7:155457947-155465560|chr7:155473602-155493466
hsa_circ_0007364	1.22775	0.73054	2.67078	0.273531	0.784445	0.996171	271	chr1	32381495	32385259	0	-	1	2	0	0	2	0	0	7	0	1	32381495	32381495	0,0,0	2	93689	0,3075	circRNA	PTP4A2	ENST00000344035	3,2	chr1:32377427-32381495|chr1:32385259-32403587
hsa_circ_0117628	18.6871	0.726437	0.920229	0.789409	0.429873	0.996171	249	chr2	152363422	152370942	0	-	7	13	8	43	28	45	36	19	11	6	152363422	152363422	0,0,0	5	105105105114111	0,1096,5824,6671,7409	circRNA	NEB	ENST00000409198	136135134133132	chr2:152362772-152363422|chr2:152370942-152371331
hsa_circ_0004058	2.28086	0.723012	2.16801	0.333492	0.738763	0.996171	908	chr6	87925620	87928449	0	+	0	1	6	1	13	1	0	0	0	1	87925620	87925620	0,0,0	3	155,79,136	0,396,2693	circRNA	ZNF292	ENST00000369577	2,3,4	chr6:87865477-87925620|chr6:87928449-87943042
hsa_circ_0000754	5.24444	0.660989	1.734	0.381193	0.70306	0.996171	557	chr17	28011580	28030080	0	-	0	5	4	0	9	0	17	15	0	6	28011580	28011580	0,0,0	3	122,65,104	0,10896,18396	circRNA	SSH2	ENST00000269033	5,4,3	chr17:28004759-28011580|chr17:28030080-28120911
hsa_circ_0001359	3.1832	0.647282	1.95397	0.331265	0.740445	0.996171	1087	chr3	169854206	169867032	0	-	0	2	8	0	12	0	0	8	1	2	169854206	169854206	0,0,0	3	247,99,159	0,9004,12667	circRNA	PHC3	ENST00000495893	7,6,5	chr3:169847340-169854206|chr3:169867032-169889160
hsa_circ_0001073	9.10744	0.624423	1.64667	0.379204	0.704536	0.996171	245	chr2	148653869	148657467	0	+	19	7	10	0	16	0	0	50	0	5	148653869	148653869	0,0,0	3	208110155	0,3157,3443	circRNA	ACVR2A	ENST00000241416	2,3,4	chr2:148602776-148653869|chr2:148657467-148672759
hsa_circ_0103069	2.59543	0.622674	2.36976	0.262759	0.792737	0.996171	1564	chr15	100692816	100739628	0	-	0	0	4	9	0	2	22	0	0	0	100692816	100692816	0,0,0	3	151141106	0,2568,46706	circRNA	ADAMTS17	ENST00000268070	10,9,8	chr15:100673520-100692816|chr15:100739628-100794340
hsa_circ_0103891	3.54381	0.610548	2.26237	0.269871	0.78726	0.996171	82	chr15	52876941	52885933	0	-	1	0	0	17	15	0	0	8	0	0	52876941	52876941	0,0,0	3	200,69,159	0,2406,8833	circRNA	FAM214A	ENST00000261844	12,11,10	chr15:52874504-52876941|chr15:52885933-52892323
hsa_circ_0003922	1.06053	0.602437	3.00871	0.200231	0.8413	0.996171	1206	chr2	231307651	231314970	0	+	0	3	1	0	0	5	3	0	0	0	231307651	231307651	0,0,0	6	163,169,84,63,150,84	0,1241,3882,6151,6624,7235	circRNA	SP100	ENST00000264052	3,4,5,6,7,8	chr2:231282380-231307651|chr2:231314970-231325976
hsa_circ_0011536	6.41244	0.597873	1.69434	0.352865	0.72419	0.996171	1786	chr1	35824525	35827390	0	+	0	0	5	15	7	0	0	13	25	5	35824525	35824525	0,0,0	3	522,62,171	0,2269,2694	circRNA	ZMYM4	ENST00000373297	3,4,5	chr1:35791006-35824525|chr1:35827390-35835629
hsa_circ_0000643	4.88402	0.595602	1.60651	0.370742	0.71083	0.996171	653	chr15	80412669	80415142	0	+	0	6	2	14	5	15	0	3	10	0	80412669	80412669	0,0,0	3	171109101	0,1384,2372	circRNA	ZFAND6	ENST00000261749	3,4,5	chr15:80390920-80412669|chr15:80415142-80423521
hsa_circ_0132246	4.03092	0.58264	2.05266	0.283846	0.776528	0.996171	1662	chr6	73005639	73043538	0	+	0	0	9	9	0	25	0	2	0	1	73005639	73005639	0,0,0	4	30113167236	0,11321,17569,37663	circRNA	RIMS1	ENST00000522211	7,8,9,10	chr6:73001749-73005639|chr6:73043538-73100299
hsa_circ_0002468	2.86816	0.571861	2.089	0.273749	0.784277	0.996171	1074	chr3	138289159	138290198	0	-	0	4	9	0	3	0	10	10	0	0	138289159	138289159	0,0,0	3	181,124,91	0,716,948	circRNA	CEP70	ENST00000264982	6,5,4	chr3:138256189-138289159|chr3:138290198-138291700
hsa_circ_0134651	3.711	0.559163	2.20391	0.253714	0.799716	0.996171	1644	chr7	75630207	75643205	0	-	0	0	5	14	6	0	0	0	19	0	75630207	75630207	0,0,0	4	113,98,146,146	0,2868,4369,12852	circRNA	STYXL1	ENST00000248600	8,7,6,5	chr7:75625917-75630207|chr7:75643205-75651168
hsa_circ_0006717	3.13769	0.554761	2.32961	0.238135	0.811777	0.996171	697	chr14	97022183	97022750	0	+	0	4	8	0	0	0	0	0	22	1	97022183	97022183	0,0,0	2	101239	0,328	circRNA	PAPOLA	ENST00000216277	18,19	chr14:97018959-97022183|chr14:97022750-97026985
hsa_circ_0008648	5.32604	0.554399	2.11947	0.261575	0.793649	0.996171	2253	chr11	94554695	94564707	0	+	0	0	0	0	5	21	0	9	0	11	94554695	94554695	0,0,0	3	292,145,90	0,8520,9922	circRNA	AMOTL1	ENST00000317829	3,4,5	chr11:94533477-94554695|chr11:94564707-94583278
hsa_circ_0000880	2.25341	0.543589	2.49917	0.217508	0.827813	0.996171	105	chr19	5604593	5604947	0	-	1	0	6	0	13	0	0	0	0	2	5604593	5604593	0,0,0	2	113150	0,204	circRNA	SAFB2	ENST00000252542	11,10	chr19:5600271-5604593|chr19:5604947-5610005
hsa_circ_0000745	1.96421	0.530215	2.55135	0.207818	0.835371	0.996171	555	chr17	20107645	20109225	0	+	0	2	0	0	4	8	0	0	0	3	20107645	20107645	0,0,0	1	1580	0	circRNA	SPECC1	ENST00000395527	4	chr17:20013875-20107645|chr17:20109225-20130725
hsa_circ_0007444	5.5631	0.521833	1.95295	0.267202	0.789313	0.996171	1998	chr5	95091099	95099324	0	+	0	0	0	14	16	17	0	1	0	6	95091099	95091099	0,0,0	2	366113	0,8112	circRNA	RHOBTB3	ENST00000379982	6,7	chr5:95088054-95091099|chr5:95099324-95103749
hsa_circ_0000591	6.02497	0.483165	1.8915	0.255439	0.798384	0.996171	79	chr15	41961025	41962156	0	+	10	7	0	0	25	0	0	0	11	6	41961025	41961025	0,0,0	1	1131	0	circRNA	MGA	ENST00000563576	2	chr15:41913787-41961025|chr15:41962156-41988272
hsa_circ_0003810	2.09549	0.460814	2.46418	0.187005	0.851656	0.996171	905	chr6	79770194	79770535	0	-	0	3	7	0	0	0	13	5	0	0	79770194	79770194	0,0,0	2	99151	0,190	circRNA	PHIP	ENST00000275034	6,5	chr6:79752720-79770194|chr6:79770535-79787164
chr16:85667519-85667738	36.5754	0.45544	0.782445	0.582072	0.560518	0.996171	76	chr16	85667519	85667738	0	+	97	19	27	20	60	72	56	38	23	22	85667519	85667519	0,0,0	1	219	0	circRNA	GSE1	ENST00000253458	2	chr16:85647004-85667519|chr16:85667738-85682157
hsa_circ_0001178	5.59729	0.400545	1.62466	0.24654	0.805264	0.996171	818	chr21	17135209	17138460	0	+	0	3	19	0	13	0	1	11	11	3	17135209	17135209	0,0,0	2	78145	0,3106	circRNA	USP25	ENST00000285679	2,3	chr21:17102757-17135209|chr21:17138460-17150222
hsa_circ_0004212	2.31641	0.398079	2.45221	0.162335	0.871042	0.996171	812	chr20	45905057	45916028	0	-	0	2	0	0	5	0	0	10	0	4	45905057	45905057	0,0,0	4	482,116,78,56	0,5788,7257,10915	circRNA	ZMYND8	ENST00000311275	11,10,9,8	chr20:45891172-45905057|chr20:45916028-45918930
chr2:152403942-152410539	4.28563	0.396919	1.65725	0.239505	0.810714	0.996171	1173	chr2	152403942	152410539	0	-	0	1	7	15	4	11	14	2	0	0	152403942	152403942	0,0,0	8	1.05105e+23	0,205,879,2207,4309,5243,5969,6399	circRNA	NEB	ENST00000409198	106,105,104,103,102,101,100,99	chr2:152402957-152403942|chr2:152410539-152411444
hsa_circ_0006916	4.16888	0.362693	2.19297	0.165389	0.868638	0.996171	964	chr5	78734832	78752841	0	-	0	4	0	0	15	0	0	10	0	7	78734832	78734832	0,0,0	4	140,93,132,157	0,8043,11980,17852	circRNA	HOMER1	ENST00000334082	5,4,3,2	chr5:78697878-78734832|chr5:78752841-78808592
hsa_circ_0084606	2.34943	0.360088	2.4504	0.146951	0.883171	0.996171	315	chr8	62531536	62566219	0	-	7	5	1	0	13	0	0	0	0	0	62531536	62531536	0,0,0	11	42,45,57,42,33,48,57,33,129,75,93	0,14705,18969,19344,23910,24408,24967,25622,27772,32072,34590	circRNA	ASPH	ENST00000541428	14,13,12,11,10,9,8,7,6,5,4	chr8:62496588-62531536|chr8:62566219-62593526
hsa_circ_0001367	8.01834	0.351959	1.7567	0.200353	0.841205	0.996171	227	chr3	183361267	183369064	0	+	2	1	17	0	30	0	0	18	0	10	183361267	183361267	0,0,0	2	63981	0,6816	circRNA	KLHL24	ENST00000242810	2,3	chr3:183353581-183361267|chr3:183369064-183381245
hsa_circ_0008103	2.89832	0.343218	2.36125	0.145355	0.884431	0.996171	469	chr11	113723222	113725057	0	-	0	3	12	0	1	0	0	0	18	0	113723222	113723222	0,0,0	2	133,78	0,1757	circRNA	USP28	ENST00000003302	3,2	chr11:113712490-113723222|chr11:113725057-113746166
hsa_circ_0000384	3.45493	0.274877	2.23396	0.123045	0.902072	0.996171	1443	chr12	27867712	27877119	0	+	0	0	10	0	9	0	15	0	0	4	27867712	27867712	0,0,0	4	41,168,61,140	0,1511,5028,9267	circRNA	MRPS35	ENST00000081029	2,3,4,5	chr12:27863888-27867712|chr12:27877119-27888379
hsa_circ_0008494	4.18492	0.197193	1.83226	0.107623	0.914295	0.996171	1237	chr1	27056141	27059283	0	+	0	3	0	13	2	12	0	12	0	3	27056141	27056141	0,0,0	3	213453117	0,1501,3025	circRNA	ARID1A	ENST00000324856	2,3,4	chr1:27024031-27056141|chr1:27059283-27087346
hsa_circ_0003253	3.19915	0.192899	2.26049	0.0853351	0.931995	0.996171	109	chr19	17387303	17387718	0	+	13	0	0	0	9	0	0	10	0	4	17387303	17387303	0,0,0	2	130,87	0,328	circRNA	BABAM1	ENST00000598188	7,8	chr19:17386634-17387303|chr19:17387718-17389653
hsa_circ_0001727	11.4953	0.188211	1.09982	0.171128	0.864123	0.996171	151	chr7	99621041	99621930	0	+	43	0	5	16	16	21	16	5	14	7	99621041	99621041	0,0,0	2	514154	0,735	circRNA	ZKSCAN1	ENST00000324306	2,3	chr7:99613349-99621041|chr7:99621930-99627483
hsa_circ_0000024	1.39386	0.179544	2.75702	0.0651222	0.948077	0.996171	1226	chr1	21083658	21100103	0	-	0	3	4	0	5	0	0	3	0	0	21083658	21083658	0,0,0	5	91,155,81,144,160	0,8211,10418,13764,16285	circRNA	HP1BP3	ENST00000312239	9,8,7,6,5	chr1:21076375-21083658|chr1:21100103-21103089
hsa_circ_0006434	1.88381	0.178514	2.37446	0.0751807	0.940071	0.996171	605	chr16	18852886	18856973	0	-	0	2	0	1	5	0	0	6	0	3	18852886	18852886	0,0,0	3	230247223	0,643,3864	circRNA	SMG1	ENST00000389467	41,40,39	chr16:18851268-18852886|chr16:18856973-18858774
hsa_circ_0008114	4.26602	0.158364	2.02669	0.0781396	0.937717	0.996171	593	chr17	77073511	77073946	0	+	0	7	0	13	19	0	0	4	0	1	77073511	77073511	0,0,0	2	68202	0,233	circRNA	ENGASE	ENST00000539857	2,3	chr17:77071172-77073511|chr17:77073946-77076288
chr6:54001512-54067031	1.78551	0.140342	2.43478	0.0576405	0.954035	0.996171	895	chr6	54001512	54067031	0	+	0	1	7	0	1	0	13	0	0	1	54001512	54001512	0,0,0	8	1572,72,66,84,60,45,45,129	0,12341,23652,23801,24025,32813,53155,65390	circRNA	MLIP	ENST00000514921	4,5,6,7,8,9,10,11	chr6:53989663-54001512|chr6:54067031-54079937
hsa_circ_0080420	2.69811	0.137533	2.33574	0.058882	0.953046	0.996171	1641	chr7	70227855	70236630	0	+	0	0	9	0	0	0	11	9	0	3	70227855	70227855	0,0,0	5	472,254,221,45,96	0,1882,3244,5154,8679	circRNA	AUTS2	ENST00000406775	7,8,9,10,11	chr7:70163606-70227855|chr7:70236630-70240342
hsa_circ_0002457	3.85069	0.136219	1.88328	0.0723306	0.942339	0.996171	401	chr12	111990083	111993723	0	-	0	2	2	11	0	0	0	4	20	3	111990083	111990083	0,0,0	4	151,72,60,37	0,626,1878,3603	circRNA	ATXN2	ENST00000389153	5,4,3,2	chr12:111963120-111990083|chr12:111993723-112036587
hsa_circ_0000378	4.82625	0.131823	1.99172	0.0661856	0.94723	0.996171	364	chr12	12397195	12397589	0	-	0	3	0	0	4	20	4	0	0	10	12397195	12397195	0,0,0	1	394	0	circRNA	LRP6	ENST00000261349	2	chr12:12356334-12397195|chr12:12397589-12419614
chr3:134327490-134346660	2.77508	0.109802	2.34143	0.0468953	0.962597	0.996171	220	chr3	134327490	134346660	0	-	21	0	0	0	0	0	13	8	0	1	134327490	134327490	0,0,0	6	191,189,118,109,83,63	0,1546,10499,12100,16404,19107	circRNA	KY	ENST00000508956	9,8,7,6,5,4	chr3:134323316-134327490|chr3:134346660-134348462
hsa_circ_0001159	2.56318	0.0963672	2.12904	0.0452632	0.963898	0.996171	134	chr20	40161688	40179999	0	-	10	2	6	0	0	0	9	0	9	0	40161688	40161688	0,0,0	2	521,56	0,18255	circRNA	CHD6	ENST00000373233	3,2	chr20:40143591-40161688|chr20:40179999-40246978
hsa_circ_0001173	3.87585	0.0757031	2.26125	0.0334785	0.973293	0.996171	815	chr20	57014000	57016139	0	+	0	1	0	0	12	8	0	0	0	9	57014000	57014000	0,0,0	2	81177	0,1962	circRNA	VAPB	ENST00000475243	4,5	chr20:57009761-57014000|chr20:57016139-57019132
hsa_circ_0008832	1.89057	0.0756636	2.57007	0.0294403	0.976513	0.996171	781	chr22	32874967	32875262	0	+	0	2	4	0	0	0	15	0	0	2	32874967	32874967	0,0,0	1	295	0	circRNA	FBXO7	ENST00000266087	2	chr22:32871111-32874967|chr22:32875262-32879883
hsa_circ_0001801	30.4646	0.0709672	0.791216	0.0896938	0.928531	0.996171	313	chr8	52773404	52773806	0	-	63	24	51	28	11	16	51	53	67	13	52773404	52773404	0,0,0	1	402	0	circRNA	PCMTD1	ENST00000360540	3	chr8:52758323-52773404|chr8:52773806-52782807
hsa_circ_0070039	3.21064	0.0544697	2.24693	0.0242418	0.98066	0.996171	1708	chr4	77055327	77065626	0	-	0	0	7	13	7	0	0	12	0	0	77055327	77055327	0,0,0	3	188,144,84	0,9974,10215	circRNA	NUP54	ENST00000507257	4,3,2	chr4:77053872-77055327|chr4:77065626-77069460
hsa_circ_0001684	1.89409	0.0258757	2.55321	0.0101346	0.991914	0.996171	142	chr7	23650789	23651172	0	+	8	0	4	0	0	0	15	0	0	1	23650789	23650789	0,0,0	1	383	0	circRNA	CCDC126	ENST00000307471	3	chr7:23637670-23650789|chr7:23651172-23682549
hsa_circ_0018493	2.28013	0.0195353	2.45893	0.00794462	0.993661	0.996171	511	chr10	69935079	69955289	0	+	0	1	13	0	6	0	0	7	0	0	69935079	69935079	0,0,0	4	139,222,150,83	0,13582,19040,20127	circRNA	MYPN	ENST00000354393	12,13,14,15	chr10:69934413-69935079|chr10:69955289-69957108
hsa_circ_0000586	24.6493	0.0139286	0.986488	0.0141194	0.988735	0.996171	78	chr15	25650607	25657118	0	-	4	23	7	18	18	21	61	16	40	38	25650607	25650607	0,0,0	3	42,120,64	0,3627,6447	circRNA	UBE3A	ENST00000232165	4,3,2	chr15:25620910-25650607|chr15:25657118-25683635
hsa_circ_0008602	1.44663	-0.0134156	2.79552	-0.00479897	0.996171	0.996171	464	chr11	106849344	106856857	0	-	0	4	1	0	7	0	0	0	0	1	106849344	106849344	0,0,0	2	122,62	0,7451	circRNA	GUCY1A2	ENST00000526355	3,2	chr11:106810904-106849344|chr11:106856857-106888478
hsa_circ_0000284	16.5633	-0.0183254	1.11265	-0.01647	0.986859	0.996171	31	chr11	33307958	33309057	0	+	19	8	33	6	39	0	30	23	6	17	33307958	33307958	0,0,0	1	1099	0	circRNA	HIPK3	ENST00000525975	2	chr11:33278298-33307958|chr11:33309057-33350055
chr5:149610867-149624764	3.08398	-0.0414609	2.2822	-0.0181671	0.985506	0.996171	1692	chr5	149610867	149624764	0	-	0	0	10	0	6	0	14	0	0	4	149610867	149610867	0,0,0	3	76,49,41	0,7395,13856	circRNA	CAMK2A	ENST00000348628	15,14,13	chr5:149607849-149610867|chr5:149624764-149627334
hsa_circ_0050851	14.4351	-0.0493589	1.43308	-0.0344425	0.972524	0.996171	731	chr19	39076577	39076831	0	+	0	30	0	0	11	19	21	16	19	20	39076577	39076577	0,0,0	2	65101	0,153	circRNA	RYR1	ENST00000355481	102103	chr19:39075739-39076577|chr19:39076831-39077164
hsa_circ_0005087	2.296	-0.0522552	2.29345	-0.0227845	0.981822	0.996171	1238	chr1	27269150	27269556	0	+	0	1	0	6	1	0	0	13	0	3	27269150	27269150	0,0,0	2	117195	0,211	circRNA	NUDC	ENST00000321265	5,6	chr1:27268309-27269150|chr1:27269556-27271880
hsa_circ_0002100	2.76678	-0.0607761	2.34002	-0.0259725	0.979279	0.996171	1483	chr11	120345268	120348235	0	+	0	0	8	0	10	0	5	0	0	4	120345268	120345268	0,0,0	5	76,168,88,87,80	0,780,2101,2659,2887	circRNA	ARHGEF12	ENST00000397843	32,33,34,35,36	chr11:120343836-120345268|chr11:120348235-120348864
hsa_circ_0006156	12.8983	-0.0951181	1.1098	-0.0857071	0.931699	0.996171	224	chr3	171965322	171969331	0	+	14	8	13	43	26	8	22	19	0	3	171965322	171965322	0,0,0	2	244282	0,3727	circRNA	FNDC3B	ENST00000415807	5,6	chr3:171944737-171965322|chr3:171969331-172003715
hsa_circ_0004502	5.28791	-0.118293	1.79533	-0.0658896	0.947466	0.996171	372	chr12	42604156	42604421	0	-	0	2	0	17	19	0	3	5	0	6	42604156	42604156	0,0,0	2	100,72	0,193	circRNA	YAF2	ENST00000551268	5,4	chr12:42555567-42604156|chr12:42604421-42629415
hsa_circ_0086414	25.9091	-0.126491	1.27505	-0.0992051	0.920975	0.996171	293	chr9	16435552	16437522	0	-	20	10	30	18	15	60	0	69	0	38	16435552	16435552	0,0,0	1	1970	0	circRNA	BNC2	ENST00000380672	6	chr9:16419647-16435552|chr9:16437522-16552527
chr11:22856452-22859910	2.23665	-0.154884	2.07569	-0.0746177	0.940519	0.996171	426	chr11	22856452	22859910	0	+	0	5	1	2	0	0	9	6	0	2	22856452	22856452	0,0,0	2	158136	0,3322	circRNA	RP11-17A1.3	ENST00000525963	2,3	chr11:22851157-22856452|chr11:22859910-22898045
hsa_circ_0000569	4.38562	-0.158023	1.84027	-0.0858695	0.93157	0.996171	101	chr14	102659799	102661457	0	+	9	5	1	0	5	17	0	0	0	6	102659799	102659799	0,0,0	2	52183	0,1475	circRNA	WDR20	ENST00000499851	2,3	chr14:102606509-102659799|chr14:102661457-102675198
hsa_circ_0003218	4.00073	-0.162393	2.21723	-0.0732413	0.941614	0.996171	1192	chr2	203329531	203332412	0	+	0	3	0	0	6	0	0	16	0	9	203329531	203329531	0,0,0	2	171171	0,2710	circRNA	BMPR2	ENST00000374580	2,3	chr2:203242273-203329531|chr2:203332412-203378441
hsa_circ_0007695	5.62555	-0.167754	1.59783	-0.104989	0.916385	0.996171	94	chr14	50616725	50616948	0	-	14	4	0	0	9	8	14	1	0	9	50616725	50616725	0,0,0	1	223	0	circRNA	SOS2	ENST00000216373	14	chr14:50612314-50616725|chr14:50616948-50619787
hsa_circ_0072547	3.11537	-0.174981	2.28545	-0.0765633	0.938971	0.996171	1679	chr5	56542126	56546968	0	+	0	0	10	11	2	14	0	0	0	0	56542126	56542126	0,0,0	4	185141168188	0,775,3109,4654	circRNA	GPBP1	ENST00000424459	8,9,10,11	chr5:56532999-56542126|chr5:56546968-56557006
hsa_circ_0005946	1.49531	-0.185382	2.73811	-0.0677044	0.946021	0.996171	545	chr17	1746096	1747980	0	+	0	5	2	1	0	0	0	9	0	0	1746096	1746096	0,0,0	3	51,79,109	0,1117,1775	circRNA	RPA1	ENST00000571058	2,3,4	chr17:1733194-1746096|chr17:1747980-1756394
chr10:69902696-69918384	2.88345	-0.188694	2.32522	-0.0811511	0.935322	0.996171	1875	chr10	69902696	69918384	0	+	0	0	0	12	4	0	0	12	0	3	69902696	69902696	0,0,0	5	176,52,115,72,142	0,2535,5413,7100,15546	circRNA	MYPN	ENST00000354393	3,4,5,6,7	chr10:69866558-69902696|chr10:69918384-69921485
hsa_circ_0000075	7.66998	-0.196155	1.70584	-0.11499	0.908453	0.996171	1254	chr1	59787207	59812070	0	+	0	2	0	14	6	0	0	18	18	14	59787207	59787207	0,0,0	3	215112152	0,18422,24711	circRNA	FGGY	ENST00000413489	2,3,4	chr1:59762579-59787207|chr1:59812070-59844420
hsa_circ_0004823	1.52012	-0.20443	2.7497	-0.074346	0.940735	0.996171	672	chr14	36121010	36128402	0	-	0	2	0	0	6	0	0	1	0	3	36121010	36121010	0,0,0	4	69,111,109,59	0,2562,4002,7333	circRNA	RALGAPA1	ENST00000389698	30,29,28,27	chr14:36104804-36121010|chr14:36128402-36133847
hsa_circ_0006107	10.9471	-0.230906	1.02544	-0.225178	0.821841	0.996171	184	chr6	170852688	170858201	0	-	16	25	19	2	6	6	12	15	23	3	170852688	170852688	0,0,0	3	130,82,108	0,2502,5405	circRNA	PSMB1	ENST00000262193	4,3,2	chr6:170846428-170852688|chr6:170858201-170862217
hsa_circ_0083220	3.53574	-0.247149	1.83815	-0.134455	0.893042	0.996171	162	chr7	158566031	158591763	0	-	13	0	13	0	5	0	9	7	0	1	158566031	158566031	0,0,0	6	56,90,73,77,135,42	0,14663,15004,20309,24601,25690	circRNA	ESYT2	ENST00000251527	7,6,5,4,3,2	chr7:158560465-158566031|chr7:158591763-158621779
hsa_circ_0001380	10.6423	-0.258385	1.3064	-0.197784	0.843214	0.996171	1103	chr3	196118683	196129890	0	-	0	6	12	13	20	14	16	6	0	16	196118683	196118683	0,0,0	3	113,66,68	0,1741,11139	circRNA	UBXN7	ENST00000296328	5,4,3	chr3:196098913-196118683|chr3:196129890-196134116
hsa_circ_0105377	7.65026	-0.265608	1.42975	-0.185773	0.852623	0.996171	612	chr16	31230415	31230840	0	+	0	4	11	4	7	0	20	1	16	13	31230415	31230415	0,0,0	2	96231	0,194	circRNA	TRIM72	ENST00000322122	3,4	chr16:31226449-31230415|chr16:31230840-31232216
hsa_circ_0135761	4.46365	-0.265939	2.04281	-0.130183	0.896421	0.996171	1410	chr8	132952745	132958880	0	+	0	1	0	27	0	13	0	11	0	1	132952745	132952745	0,0,0	3	77128151	0,4246,5984	circRNA	EFR3A	ENST00000254624	2,3,4	chr8:132916569-132952745|chr8:132958880-132962215
hsa_circ_0063050	35.7857	-0.273979	0.965432	-0.283789	0.776572	0.996171	123	chr22	36006930	36007153	0	-	15	56	91	66	48	30	92	20	14	1	36006930	36006930	0,0,0	1	223	0	circRNA	MB	ENST00000401702	2	chr22:36003490-36006930|chr22:36007153-36011620
hsa_circ_0001360	3.80865	-0.28341	2.19794	-0.128944	0.897402	0.996171	1088	chr3	169863210	169867032	0	-	0	4	5	16	0	0	27	0	0	0	169863210	169863210	0,0,0	2	99159	0,3663	circRNA	PHC3	ENST00000495893	6,5	chr3:169854453-169863210|chr3:169867032-169889160
hsa_circ_0002301	2.37078	-0.290461	2.23888	-0.129735	0.896776	0.996171	90	chr14	31596990	31602881	0	-	1	0	6	0	0	3	0	10	0	4	31596990	31596990	0,0,0	4	222837177167	0,827,5453,5724	circRNA	HECTD1	ENST00000399332	26,25,24,23	chr14:31592253-31596990|chr14:31602881-31604077
hsa_circ_0008285	4.53817	-0.293688	1.95716	-0.150058	0.880719	0.996171	876	chr6	4891946	4892613	0	+	0	5	0	12	13	0	0	9	0	5	4891946	4891946	0,0,0	1	667	0	circRNA	CDYL	ENST00000328908	4	chr6:4735078-4891946|chr6:4892613-4935748
chr5:137219072-137219280	25.4613	-0.299986	0.974514	-0.307831	0.758211	0.996171	188	chr5	137219072	137219280	0	+	45	28	22	38	30	0	48	46	20	19	137219072	137219072	0,0,0	1	208	0	circRNA	MYOT	ENST00000239926	7	chr5:137217794-137219072|chr5:137219280-137221736
hsa_circ_0001030	1.60952	-0.327473	2.69186	-0.121653	0.903174	0.996171	1138	chr2	72958135	72960247	0	-	0	2	6	0	7	0	0	0	0	1	72958135	72958135	0,0,0	3	46,91,48	0,148,2064	circRNA	EXOC6B	ENST00000272427	5,4,3	chr2:72945436-72958135|chr2:72960247-72968432
hsa_circ_0000471	30.734	-0.37706	1.00253	-0.376109	0.706836	0.996171	8	chr13	33091993	33101669	0	-	30	17	64	29	41	39	38	41	0	33	33091993	33091993	0,0,0	4	147,77,89,75	0,3516,4325,9601	circRNA	N4BP2L2	ENST00000504114	5,4,3,2	chr13:33018263-33091993|chr13:33101669-33112754
hsa_circ_0002163	1.73763	-0.381565	2.64269	-0.144385	0.885197	0.996171	933	chr6	158922709	158925210	0	+	0	7	0	0	2	0	0	7	0	1	158922709	158922709	0,0,0	1	2501	0	circRNA	TULP4	ENST00000367097	13	chr6:158919844-158922709|chr6:158925210-158927609
chr13:42439871-42461497	3.21043	-0.428615	2.27595	-0.188324	0.850623	0.996171	1433	chr13	42439871	42461497	0	-	0	0	16	0	5	0	0	11	0	3	42439871	42439871	0,0,0	7	78,135,132,105,109,50,165	0,166,2610,17651,20184,21045,21461	circRNA	VWA8	ENST00000379310	12,11,10,9,8,7,6	chr13:42407667-42439871|chr13:42461497-42465555
hsa_circ_0006404	1.77643	-0.442285	2.6012	-0.170031	0.864986	0.996171	1984	chr6	108984657	108986092	0	+	0	0	0	8	2	0	0	7	0	2	108984657	108984657	0,0,0	1	1435	0	circRNA	FOXO3	ENST00000343882	3	chr6:108883032-108984657|chr6:108986092-109001029
hsa_circ_0001092	8.44512	-0.503501	1.36923	-0.367725	0.713078	0.996171	255	chr2	202010100	202014558	0	+	11	6	17	0	1	6	27	14	0	12	202010100	202010100	0,0,0	3	55,50,82	0,3625,4376	circRNA	CFLAR	ENST00000309955	6,7,8	chr2:202005162-202010100|chr2:202014558-202025154
hsa_circ_0008368	4.20573	-0.509115	1.86259	-0.273338	0.784594	0.996171	1287	chr1	154145383	154145677	0	-	0	1	8	22	1	0	0	7	13	0	154145383	154145383	0,0,0	2	71118	0,176	circRNA	TPM3	ENST00000368533	4,3	chr1:154144580-154145383|chr1:154145677-154148590
hsa_circ_0005993	1.98762	-0.510801	2.33142	-0.219094	0.826577	0.996171	1337	chr9	33956076	33963789	0	-	0	2	12	0	5	0	1	0	3	0	33956076	33956076	0,0,0	3	68,53,66	0,4747,7647	circRNA	UBAP2	ENST00000449054	11,10,9	chr9:33953472-33956076|chr9:33963789-33971648
hsa_circ_0004846	2.53702	-0.516596	2.37614	-0.21741	0.827889	0.996171	1573	chr14	55168779	55169298	0	+	0	0	9	0	7	0	5	0	0	4	55168779	55168779	0,0,0	1	519	0	circRNA	SAMD4A	ENST00000554335	3	chr14:55034830-55168779|chr14:55169298-55203741
hsa_circ_0108763	1.4241	-0.526276	2.75667	-0.19091	0.848596	0.996171	769	chr18	60212034	60227877	0	+	0	4	0	0	0	0	0	3	4	2	60212034	60212034	0,0,0	5	72,113,95,84,58	0,5546,11401,13885,15785	circRNA	ZCCHC2	ENST00000269499	4,5,6,7,8	chr18:60209807-60212034|chr18:60227877-60230241
hsa_circ_0003713	2.02407	-0.53925	2.28916	-0.235566	0.813769	0.996171	633	chr15	59204761	59205895	0	-	0	2	0	5	0	0	9	3	0	3	59204761	59204761	0,0,0	2	48198	0,936	circRNA	SLTM	ENST00000380516	5,4	chr15:59193486-59204761|chr15:59205895-59209133
hsa_circ_0008193	2.30209	-0.542226	2.27383	-0.238463	0.811522	0.996171	1351	chr9	96233422	96238620	0	+	0	1	15	1	0	7	0	4	0	0	96233422	96233422	0,0,0	2	247,83	0,5115	circRNA	FAM120A	ENST00000277165	2,3	chr9:96214671-96233422|chr9:96238620-96259752
hsa_circ_0117627	18.5977	-0.542442	0.806247	-0.672798	0.501076	0.996171	247	chr2	152346484	152347032	0	-	40	20	20	34	10	16	13	20	32	12	152346484	152346484	0,0,0	2	107147	0,401	circRNA	NEB	ENST00000409198	149148	chr2:152342447-152346484|chr2:152347032-152348196
hsa_circ_0001654	3.99052	-0.582164	2.05076	-0.283877	0.776505	0.996171	930	chr6	155095122	155116273	0	+	0	1	9	0	0	0	0	17	3	8	155095122	155095122	0,0,0	5	84,45,162,154,131	0,4012,13872,18834,21020	circRNA	SCAF8	ENST00000367178	2,3,4,5,6	chr6:155055064-155095122|chr6:155116273-155123104
hsa_circ_0009061	3.10397	-0.584771	2.05361	-0.284752	0.775834	0.996171	261	chr1	23356961	23377013	0	+	12	0	8	0	4	0	13	0	0	3	23356961	23356961	0,0,0	2	166134	0,19918	circRNA	KDM1A	ENST00000356634	2,3	chr1:23346440-23356961|chr1:23377013-23380253
hsa_circ_0001819	6.14519	-0.593817	1.50512	-0.39453	0.69319	0.996171	318	chr8	103372298	103373854	0	-	22	10	10	0	8	0	0	8	12	3	103372298	103372298	0,0,0	4	120,77,82,45	0,518,1054,1511	circRNA	UBR5	ENST00000520539	5,4,3,2	chr8:103359320-103372298|chr8:103373854-103424400
chr3:157839891-157841780	3.38351	-0.611067	2.27926	-0.268099	0.788623	0.996171	1085	chr3	157839891	157841780	0	+	0	2	8	0	13	0	0	0	0	6	157839891	157839891	0,0,0	2	196126	0,1763	circRNA	RSRC1	ENST00000480820	2,3	chr3:157823799-157839891|chr3:157841780-157920860
hsa_circ_0008297	1.5991	-0.614893	2.67994	-0.229443	0.818525	0.996171	2	chrY	15021270	15024974	0	+	10	2	0	0	0	7	0	0	0	1	15021270	15021270	0,0,0	4	48130156100	0,2480,3368,3604	circRNA	DDX3Y	ENST00000360160	4,5,6,7	chrY:15019505-15021270|chrY:15024974-15025629
hsa_circ_0000246	23.5974	-0.676963	1.21489	-0.55722	0.577377	0.996171	515	chr10	74468040	74475660	0	+	0	16	60	44	32	0	20	20	35	23	74468040	74468040	0,0,0	3	74,116,49	0,6828,7571	circRNA	MCU	ENST00000604679	2,3,4	chr10:74452059-74468040|chr10:74475660-74594116
hsa_circ_0001333	1.77002	-0.705586	2.59641	-0.271755	0.785811	0.996171	1068	chr3	125032151	125050082	0	-	0	2	0	11	4	3	0	0	0	0	125032151	125032151	0,0,0	3	349,136,81	0,10001,17850	circRNA	ZNF148	ENST00000360647	4,3,2	chr3:125007072-125032151|chr3:125050082-125093945
hsa_circ_0016866	3.04923	-0.727006	2.29101	-0.31733	0.750993	0.996171	1315	chr1	230798886	230800333	0	+	0	3	20	0	6	0	0	7	0	0	230798886	230798886	0,0,0	2	81104	0,1343	circRNA	COG2	ENST00000494371	4,5	chr1:230796569-230798886|chr1:230800333-230804421
hsa_circ_0007552	5.04049	-0.764506	2.13798	-0.357583	0.720655	0.996171	411	chr12	123983090	123984083	0	-	0	3	0	26	0	0	0	24	0	4	123983090	123983090	0,0,0	2	222119	0,874	circRNA	RILPL1	ENST00000376874	4,3	chr12:123970352-123983090|chr12:123984083-124008041
hsa_circ_0000734	3.90155	-0.777679	2.00673	-0.387534	0.698361	0.996171	49	chr17	1746096	1756483	0	+	10	1	6	17	0	16	0	0	0	0	1746096	1746096	0,0,0	4	51,79,109,89	0,1117,1775,10298	circRNA	RPA1	ENST00000571058	2,3,4,5	chr17:1733194-1746096|chr17:1756483-1775727
hsa_circ_0001861	3.90218	-0.813913	1.83062	-0.44461	0.656602	0.996171	1343	chr9	37424841	37426651	0	+	0	7	0	4	5	0	0	7	4	7	37424841	37424841	0,0,0	3	131,73,117	0,1077,1693	circRNA	GRHPR	ENST00000493368	2,3,4	chr9:37422802-37424841|chr9:37426651-37428480
hsa_circ_0000043	2.83414	-0.826791	2.35918	-0.350457	0.725995	0.996171	1240	chr1	31465236	31468067	0	-	0	2	0	0	6	0	0	5	0	8	31465236	31465236	0,0,0	2	271167	0,2664	circRNA	PUM1	ENST00000257075	7,6	chr1:31454252-31465236|chr1:31468067-31478699
hsa_circ_0001498	3.43355	-0.84304	2.28801	-0.36846	0.71253	0.996171	963	chr5	76758919	76760634	0	-	0	1	14	0	12	0	0	0	0	5	76758919	76758919	0,0,0	2	132,49	0,1666	circRNA	WDR41	ENST00000296679	4,3	chr5:76754949-76758919|chr5:76760634-76785281
hsa_circ_0001776	2.80237	-0.845766	2.17772	-0.388372	0.697741	0.996171	161	chr7	158552176	158557544	0	-	3	4	0	0	0	10	0	1	0	6	158552176	158552176	0,0,0	5	96,90,49,83,177	0,572,2010,3597,5191	circRNA	ESYT2	ENST00000251527	13,12,11,10,9	chr7:158542414-158552176|chr7:158557544-158560344
hsa_circ_0001771	4.68407	-0.846638	2.17904	-0.388537	0.697619	0.996171	873	chr7	155457868	155473602	0	+	0	2	0	0	7	0	0	12	0	14	155457868	155457868	0,0,0	4	79,49,77,319	0,7692,13433,15415	circRNA	RBM33	ENST00000287912	2,3,4,5	chr7:155437613-155457868|chr7:155473602-155493466
hsa_circ_0007367	3.35825	-0.849954	2.29157	-0.370905	0.710708	0.996171	1335	chr9	33948371	33956144	0	-	0	1	11	0	0	0	0	0	14	6	33948371	33948371	0,0,0	3	214,190,68	0,4911,7705	circRNA	UBAP2	ENST00000449054	13,12,11	chr9:33944637-33948371|chr9:33956144-33960823
hsa_circ_0001400	16.3347	-0.907268	1.31497	-0.689953	0.490224	0.996171	994	chr4	37633006	37640126	0	-	0	8	24	75	26	2	30	12	0	10	37633006	37633006	0,0,0	3	139,237,58	0,3502,7062	circRNA	RELL1	ENST00000314117	6,5,4	chr4:37592839-37633006|chr4:37640126-37648989
hsa_circ_0002398	4.62445	-0.923461	1.83528	-0.50317	0.614844	0.996171	699	chr14	102506572	102507010	0	+	0	1	12	0	0	2	0	7	10	10	102506572	102506572	0,0,0	2	175,76	0,362	circRNA	DYNC1H1	ENST00000360184	63,64	chr14:102506069-102506572|chr14:102507010-102507910
hsa_circ_0003261	3.54452	-0.927843	2.27695	-0.407494	0.683645	0.996171	841	chr7	72361165	72361649	0	+	0	3	0	0	0	2	0	0	12	10	72361165	72361165	0,0,0	2	127178	0,306	circRNA	POM121	ENST00000257622	2,3	chr7:72350456-72361165|chr7:72361649-72396799
hsa_circ_0001851	10.2668	-0.941378	1.28004	-0.735431	0.462077	0.996171	297	chr9	33971648	33973235	0	-	24	3	12	13	7	0	30	11	0	16	33971648	33971648	0,0,0	2	104,55	0,1532	circRNA	UBAP2	ENST00000449054	8,7	chr9:33963789-33971648|chr9:33973235-33986757
hsa_circ_0003865	0.795037	-0.956956	3.06292	-0.312433	0.754711	0.996171	117	chr18	9204473	9221997	0	+	6	0	0	0	1	0	0	0	2	1	9204473	9204473	0,0,0	5	69147201143148	0,4181,7108,12282,17376	circRNA	ANKRD12	ENST00000262126	4,5,6,7,8	chr18:9195696-9204473|chr18:9221997-9254208
hsa_circ_0002387	10.122	-0.975354	1.36726	-0.713362	0.475622	0.996171	223	chr3	170906490	170912424	0	-	2	4	16	12	4	0	16	25	0	20	170906490	170906490	0,0,0	3	131,91,111	0,1995,5823	circRNA	TNIK	ENST00000436636	7,6,5	chr3:170895169-170906490|chr3:170912424-170928904
hsa_circ_0001074	8.99641	-1.01758	1.27962	-0.79522	0.426486	0.996171	246	chr2	148730307	148733544	0	-	10	16	27	10	0	13	5	19	0	4	148730307	148730307	0,0,0	3	91,77,74	0,709,3163	circRNA	ORC4	ENST00000392857	4,3,2	chr2:148716435-148730307|chr2:148733544-148778201
hsa_circ_0008521	5.70535	-1.03371	1.76544	-0.585525	0.558195	0.996171	98	chr14	73614502	73614802	0	+	10	8	0	0	12	0	0	7	1	12	73614502	73614502	0,0,0	2	82128	0,172	circRNA	PSEN1	ENST00000557356	2,3	chr14:73603156-73614502|chr14:73614802-73637504
hsa_circ_0000551	2.39488	-1.03484	2.40558	-0.430184	0.667062	0.996171	97	chr14	70633355	70635201	0	-	11	2	0	0	0	0	0	10	0	4	70633355	70633355	0,0,0	1	1846	0	circRNA	SLC8A3	ENST00000356921	2	chr14:70527656-70633355|chr14:70635201-70655095
hsa_circ_0000524	2.6375	-1.05107	2.36258	-0.444882	0.656405	0.996171	668	chr14	23378691	23380612	0	-	0	4	12	0	0	0	0	11	0	2	23378691	23378691	0,0,0	2	113,76	0,1845	circRNA	RBM23	ENST00000359890	3,2	chr14:23377589-23378691|chr14:23380612-23388207
hsa_circ_0008604	3.85453	-1.06657	1.97867	-0.539033	0.589864	0.996171	57	chr17	30498061	30503232	0	+	13	4	0	11	0	0	0	16	0	3	30498061	30498061	0,0,0	5	59,82,44,54,53	0,2788,4276,4919,5118	circRNA	RHOT1	ENST00000333942	2,3,4,5,6	chr17:30469748-30498061|chr17:30503232-30509775
hsa_circ_0005600	16.4501	-1.16123	1.02124	-1.13708	0.255503	0.996171	60	chr17	57430575	57430887	0	+	15	20	41	27	19	9	12	20	0	15	57430575	57430575	0,0,0	1	312	0	circRNA	YPEL2	ENST00000312655	2	chr17:57409185-57430575|chr17:57430887-57465687
hsa_circ_0001136	6.37442	-1.18565	1.4711	-0.805966	0.420263	0.996171	128	chr20	30954186	30956926	0	+	2	3	1	32	7	0	7	10	0	7	30954186	30954186	0,0,0	3	83,3,109	0,1343,2631	circRNA	ASXL1	ENST00000375687	2,3,4	chr20:30946635-30954186|chr20:30956926-31015930
chr6:123637601-123703292	6.27216	-1.20979	1.74837	-0.691954	0.488966	0.996171	916	chr6	123637601	123703292	0	-	0	8	8	26	18	0	1	0	0	4	123637601	123637601	0,0,0	10	39,51,51,48,48,27,27,33,21,30	0,15422,21162,36082,49678,59148,61259,61409,64913,65661	circRNA	TRDN	ENST00000398178	24,23,22,21,20,19,18,17,16,15	chr6:123600227-123637601|chr6:123703292-123709666
hsa_circ_0128535	2.02885	-1.21084	2.53349	-0.477935	0.632696	0.996171	944	chr5	16779653	16783578	0	-	0	1	9	0	6	0	0	0	0	3	16779653	16779653	0,0,0	5	104,85,14,125,135	0,979,1183,2160,3790	circRNA	MYO10	ENST00000513610	9,8,7,6,5	chr5:16769312-16779653|chr5:16783578-16794754
hsa_circ_0002058	1.55548	-1.2182	2.72008	-0.447853	0.65426	0.996171	436	chr11	61133516	61135470	0	+	0	1	10	0	0	0	0	6	0	1	61133516	61133516	0,0,0	2	172,76	0,1878	circRNA	TMEM138	ENST00000278826	3,4	chr11:61131990-61133516|chr11:61135470-61136068
hsa_circ_0007904	2.89581	-1.34366	2.3113	-0.581342	0.56101	0.996171	827	chr7	18705835	18706099	0	+	0	4	8	0	8	0	0	0	0	5	18705835	18705835	0,0,0	1	264	0	circRNA	HDAC9	ENST00000461159	11	chr7:18688306-18705835|chr7:18706099-18767202
chr7:65592690-65599361	5.79404	-1.36588	1.70703	-0.800146	0.423626	0.996171	145	chr7	65592690	65599361	0	+	14	5	3	23	16	0	0	0	0	4	65592690	65592690	0,0,0	3	37,99,95	0,3040,6576	circRNA	AC068533.7	ENST00000450043	8,9,10	chr7:65557650-65592690|chr7:65599361-65610429
hsa_circ_0002490	5.26165	-1.39473	1.78126	-0.783003	0.433625	0.996171	959	chr5	72370568	72373320	0	+	0	5	5	11	0	15	0	1	0	10	72370568	72370568	0,0,0	2	112156	0,2596	circRNA	FCHO2	ENST00000341845	19,20	chr5:72364606-72370568|chr5:72373320-72374006
hsa_circ_0000061	12.8484	-1.42212	1.00527	-1.41466	0.157168	0.996171	275	chr1	41536266	41541123	0	-	18	14	32	27	10	1	2	17	11	11	41536266	41536266	0,0,0	2	127233	0,4624	circRNA	SCMH1	ENST00000456518	4,3	chr1:41514562-41536266|chr1:41541123-41608549
chr11:64525250-64526176	3.3467	-1.44814	2.03395	-0.711984	0.476475	0.996171	437	chr11	64525250	64526176	0	-	0	3	15	12	2	0	0	9	0	0	64525250	64525250	0,0,0	4	132,104,79,102	0,467,658,824	circRNA	PYGM	ENST00000164139	5,4,3,2	chr11:64523030-64525250|chr11:64526176-64527127
hsa_circ_0078784	7.58355	-1.47329	1.46396	-1.00637	0.314238	0.996171	183	chr6	170846321	170858201	0	-	38	2	8	9	0	0	19	10	0	10	170846321	170846321	0,0,0	4	107,130,82,108	0,6367,8869,11772	circRNA	PSMB1	ENST00000262193	5,4,3,2	chr6:170844493-170846321|chr6:170858201-170862217
hsa_circ_0003441	3.08443	-1.47983	2.15594	-0.6864	0.492461	0.996171	11	chr13	61013821	61041513	0	+	1	2	0	0	4	0	0	5	0	10	61013821	61013821	0,0,0	4	85,62,161,142	0,4999,20692,27550	circRNA	TDRD3	ENST00000196169	2,3,4,5	chr13:60971144-61013821|chr13:61041513-61057908
hsa_circ_0001792	18.7463	-1.48299	0.981185	-1.51143	0.13068	0.996171	307	chr8	41518947	41519459	0	-	48	5	26	77	6	15	16	24	1	13	41518947	41518947	0,0,0	2	135,66	0,446	circRNA	ANK1	ENST00000289734	42,41	chr8:41513272-41518947|chr8:41519459-41521176
chr13:42385360-42393522	1.91267	-1.50154	2.49532	-0.601742	0.547346	0.996171	9	chr13	42385360	42393522	0	-	9	4	6	0	5	0	0	0	0	0	42385360	42385360	0,0,0	3	116,78,169	0,5473,7993	circRNA	VWA8	ENST00000379310	17,16,15	chr13:42361679-42385360|chr13:42393522-42404664
hsa_circ_0004524	7.8018	-1.51475	1.46028	-1.0373	0.299594	0.996171	221	chr3	138289159	138291774	0	-	14	5	24	0	10	0	7	7	0	13	138289159	138289159	0,0,0	4	181,124,91,74	0,716,948,2541	circRNA	CEP70	ENST00000264982	6,5,4,3	chr3:138256189-138289159|chr3:138291774-138310695
chr7:152007050-152012423	4.92972	-1.52334	1.88786	-0.80691	0.419719	0.996171	158	chr7	152007050	152012423	0	-	12	6	12	0	0	14	0	0	0	7	152007050	152007050	0,0,0	3	110149201	0,1832,5172	circRNA	KMT2C	ENST00000262189	6,5,4	chr7:151970952-152007050|chr7:152012423-152027685
hsa_circ_0000002	8.21166	-1.54239	1.8118	-0.8513	0.394603	0.996171	1213	chr1	1158623	1159348	0	-	0	17	9	37	0	0	0	27	0	3	1158623	1158623	0,0,0	2	114137	0,588	circRNA	SDF4	ENST00000360001	4,3	chr1:1154307-1158623|chr1:1159348-1163847
hsa_circ_0008086	3.42133	-1.56842	1.89415	-0.828037	0.40765	0.996171	164	chr6	20781375	20846409	0	+	14	1	8	1	0	0	0	11	0	5	20781375	20781375	0,0,0	2	121104	0,64930	circRNA	CDKAL1	ENST00000274695	8,9	chr6:20758874-20781375|chr6:20846409-20955649
hsa_circ_0056019	5.69623	-1.60573	1.65188	-0.972059	0.331021	0.996171	243	chr2	110919179	110920712	0	-	9	3	10	1	13	0	0	1	0	13	110919179	110919179	0,0,0	2	95,88	0,1445	circRNA	NPHP1	ENST00000316534	10,9	chr2:110917832-110919179|chr2:110920712-110922096
hsa_circ_0000076	4.23023	-1.6797	1.99224	-0.843123	0.39916	0.996171	278	chr1	59805629	59812070	0	+	17	1	0	0	6	0	6	0	0	11	59805629	59805629	0,0,0	2	112152	0,6289	circRNA	FGGY	ENST00000413489	3,4	chr1:59787422-59805629|chr1:59812070-59844420
hsa_circ_0000944	3.36832	-1.70922	1.81761	-0.940365	0.34703	0.996171	114	chr19	47767859	47768203	0	+	17	5	9	0	4	0	6	0	0	2	47767859	47767859	0,0,0	2	84174	0,170	circRNA	CCDC9	ENST00000221922	6,7	chr19:47764096-47767859|chr19:47768203-47769867
hsa_circ_0001756	1.70325	-1.82755	2.44918	-0.746189	0.455553	0.996171	869	chr7	139415730	139416814	0	-	0	4	0	1	3	0	1	0	0	4	139415730	139415730	0,0,0	1	1084	0	circRNA	HIPK2	ENST00000406875	2	chr7:139316471-139415730|chr7:139416814-139477403
hsa_circ_0018168	2.55908	-1.87174	2.00157	-0.935139	0.349717	0.996171	1489	chr10	34558584	34573173	0	-	0	0	12	6	3	0	0	1	2	3	34558584	34558584	0,0,0	2	243111	0,14478	circRNA	PARD3	ENST00000545260	20,19	chr10:34420511-34558584|chr10:34573173-34606034
chr11:1862138-1862238	1.24898	-1.95991	2.25747	-0.868191	0.38529	0.996171	28	chr11	1862138	1862238	0	+	1	1	4	4	1	0	0	2	0	1	1862138	1862138	0,0,0	1	100	0	ciRNA	TNNI2	ENST00000381911	6	chr11:1862138-1862260
hsa_circ_0006633	11.0092	-2.03464	1.36406	-1.4916	0.135805	0.996171	279	chr1	59805629	59844509	0	+	19	15	27	13	7	16	0	0	0	15	59805629	59805629	0,0,0	3	112,152,89	0,6289,38791	circRNA	FGGY	ENST00000371218	3,4,5	chr1:59787422-59805629|chr1:59844509-59922632
hsa_circ_0000914	3.44253	-2.03922	2.21402	-0.921051	0.357024	0.996171	716	chr19	18648410	18649246	0	-	0	3	5	26	0	0	0	0	8	0	18648410	18648410	0,0,0	2	173221	0,615	circRNA	FKBP8	ENST00000597960	6,5	chr19:18644157-18648410|chr19:18649246-18650180
hsa_circ_0009027	4.54346	-2.05504	1.77171	-1.15992	0.246081	0.996171	1242	chr1	33760537	33760906	0	+	0	9	12	14	8	0	0	1	0	3	33760537	33760537	0,0,0	2	79159	0,210	circRNA	ZNF362	ENST00000539719	7,8	chr1:33747412-33760537|chr1:33760906-33764530
hsa_circ_0040823	1.96017	-2.14904	2.28394	-0.940933	0.346739	0.996171	620	chr16	88061088	88071617	0	+	0	3	7	4	0	4	0	0	0	2	88061088	88061088	0,0,0	4	168,137,63,39	0,5626,7849,10490	circRNA	BANP	ENST00000286122	8,9,10,11	chr16:88052273-88061088|chr16:88071617-88098872
hsa_circ_0001948	0.952444	-2.26875	3.06822	-0.739435	0.459643	0.996171	339	chrX	149962163	149984551	0	-	0	3	6	0	0	0	1	0	1	0	149962163	149962163	0,0,0	5	66,84,69,75,72	0,1515,1727,21171,22316	circRNA	CD99L2	ENST00000346693	8,7,6,5,4	chrX:149945955-149962163|chrX:149984551-149996778
hsa_circ_0006354	4.67783	-2.47622	2.11481	-1.17089	0.241641	0.996171	1215	chr1	7837219	7838229	0	+	0	4	9	0	7	0	0	0	0	14	7837219	7837219	0,0,0	2	159,52	0,958	circRNA	VAMP3	ENST00000054666	3,4	chr1:7833571-7837219|chr1:7838229-7839685
hsa_circ_0001953	2.28894	-2.52376	2.20854	-1.14273	0.253152	0.996171	1	chrY	2821949	2829687	0	+	13	4	0	0	0	2	0	2	0	4	2821949	2821949	0,0,0	2	89573	0,7165	circRNA	ZFY	ENST00000383052	2,3	chrY:2803487-2821949|chrY:2829687-2843135
hsa_circ_0000247	7.52325	-2.71835	1.3795	-1.97053	0.0487781	0.996171	42	chr10	74474868	74475660	0	+	15	11	9	20	6	0	0	5	0	11	74474868	74474868	0,0,0	2	116,49	0,743	circRNA	MCU	ENST00000603649	2,3	chr10:74452059-74474868|chr10:74475660-74496242
hsa_circ_0002590	3.77356	-2.73381	1.94813	-1.4033	0.160527	0.996171	194	chr4	39739039	39776553	0	+	11	0	6	23	5	0	0	0	0	2	39739039	39739039	0,0,0	4	94,59,83,100	0,8332,18237,37414	circRNA	UBE2K	ENST00000261427	2,3,4,5	chr4:39700010-39739039|chr4:39776553-39779301
hsa_circ_0007646	1.37838	-2.74006	2.7723	-0.98837	0.322971	0.996171	1002	chr4	52729602	52758017	0	+	0	3	3	0	2	0	0	0	0	3	52729602	52729602	0,0,0	5	71,115,92,677,92	0,10834,14326,23131,28323	circRNA	DCUN1D4	ENST00000509376	2,3,4,5,6	chr4:52709433-52729602|chr4:52758017-52765435
hsa_circ_0117010	2.08773	-2.84904	2.24904	-1.26678	0.205235	0.996171	1159	chr2	110901118	110919274	0	-	0	3	5	9	0	0	0	0	3	2	110901118	110901118	0,0,0	7	100,77,83,111,75,129,95	0,951,3211,4374,6640,16585,18061	circRNA	NPHP1	ENST00000316534	16,15,14,13,12,11,10	chr2:110889368-110901118|chr2:110919274-110920624
hsa_circ_0118236	3.55918	-2.92632	1.83601	-1.59385	0.110969	0.996171	1189	chr2	180815238	180815653	0	-	0	8	5	16	1	0	0	4	0	3	180815238	180815238	0,0,0	2	221102	0,313	circRNA	CWC22	ENST00000410053	19,18	chr2:180810442-180815238|chr2:180815653-180817197
hsa_circ_0141401	7.55555	-3.26854	1.47182	-2.22075	0.0263681	0.996171	121	chr18	56246045	56247780	0	-	9	5	5	28	0	7	0	1	0	16	56246045	56246045	0,0,0	1	1735	0	circRNA	ALPK2	ENST00000361673	4	chr18:56205456-56246045|chr18:56247780-56274553
hsa_circ_0000109	1.93827	-3.33634	2.5627	-1.30188	0.192956	0.996171	1802	chr1	113196219	113202401	0	+	0	0	1	16	2	0	0	0	0	2	113196219	113196219	0,0,0	4	64,207,80,79	0,867,5424,6103	circRNA	CAPZA1	ENST00000263168	4,5,6,7	chr1:113192091-113196219|chr1:113202401-113209695
hsa_circ_0067871	2.0469	-3.4871	2.47772	-1.40739	0.159313	0.996171	222	chr3	167754623	167766153	0	-	23	1	7	0	0	0	0	2	0	0	167754623	167754623	0,0,0	7	159,84,83,151,54,50,75	0,3950,4556,6543,7992,10114,11455	circRNA	GOLIM4	ENST00000470487	8,7,6,5,4,3,2	chr3:167750640-167754623|chr3:167766153-167812886
hsa_circ_0067323	1.35976	-3.51583	2.72127	-1.29198	0.196363	0.996171	219	chr3	129546645	129551669	0	-	8	2	0	8	0	0	0	1	0	0	129546645	129546645	0,0,0	2	706,53	0,4971	circRNA	TMCC1	ENST00000393238	3,2	chr3:129390107-129546645|chr3:129551669-129599151
hsa_circ_0125943	2.67121	-3.54465	2.35363	-1.50604	0.132057	0.996171	1032	chr4	186444515	186446325	0	-	0	15	5	0	0	0	3	0	0	2	186444515	186444515	0,0,0	2	85152	0,1658	circRNA	PDLIM3	ENST00000284770	3,2	chr4:186435491-186444515|chr4:186446325-186456495
hsa_circ_0008362	4.7211	-3.7899	1.83879	-2.06108	0.0392955	0.996171	46	chr10	103427642	103436193	0	-	14	6	0	15	0	0	0	4	0	9	103427642	103427642	0,0,0	4	95,133,186,96	0,5029,5602,8455	circRNA	FBXW4	ENST00000331272	5,4,3,2	chr10:103384567-103427642|chr10:103436193-103454137
hsa_circ_0131936	2.96526	-3.98083	2.32742	-1.71041	0.0871907	0.996171	170	chr6	54034325	54095715	0	+	1	0	9	0	2	0	0	0	0	10	54034325	54034325	0,0,0	4	45,45,129,204	0,20342,32577,61186	circRNA	MLIP	ENST00000274897	8,9,10,11	chr6:54025597-54034325|chr6:54095715-54122105
hsa_circ_0001148	1.94283	-4.02568	2.50251	-1.60866	0.107691	0.996171	1614	chr20	34309661	34313077	0	-	0	0	9	12	1	0	0	0	0	1	34309661	34309661	0,0,0	3	138153118	0,2830,3298	circRNA	RBM39	ENST00000463004	8,7,6	chr20:34304727-34309661|chr20:34313077-34317233
hsa_circ_0047886	1.99288	-4.08829	2.50329	-1.63317	0.102433	0.996171	768	chr18	60212034	60223530	0	+	0	5	15	0	0	0	1	0	0	1	60212034	60212034	0,0,0	3	72,113,95	0,5546,11401	circRNA	ZCCHC2	ENST00000269499	4,5,6	chr18:60209807-60212034|chr18:60223530-60225919
hsa_circ_0006117	1.32386	-4.12324	2.78611	-1.47992	0.138894	0.996171	794	chr20	2944917	2945848	0	+	0	1	12	1	0	0	0	0	0	1	2944917	2944917	0,0,0	2	79342	0,589	circRNA	PTPRA	ENST00000380393	8,9	chr20:2928670-2944917|chr20:2945848-2955860
hsa_circ_0116009	1.62655	-4.4334	2.62588	-1.68835	0.091344	0.996171	140	chr21	40578033	40584633	0	-	23	1	1	0	0	0	0	0	0	1	40578033	40578033	0,0,0	4	167,153,144,42	0,3887,4678,6558	circRNA	BRWD1	ENST00000333229	37,36,35,34	chr21:40574471-40578033|chr21:40584633-40585406
hsa_circ_0003274	1.80663	-4.55872	2.48376	-1.83541	0.0664444	0.996171	978	chr5	135489280	135489852	0	+	0	1	8	6	0	0	0	0	0	3	135489280	135489280	0,0,0	1	572	0	circRNA	SMAD5	ENST00000514641	3	chr5:135483595-135489280|chr5:135489852-135496544
hsa_circ_0003239	2.87708	-4.63679	2.2666	-2.04571	0.0407853	0.996171	50	chr17	4186092	4200109	0	-	39	2	6	0	0	1	0	0	0	0	4186092	4186092	0,0,0	3	124,179,98	0,6432,13919	circRNA	UBE2G1	ENST00000396981	5,4,3	chr17:4175811-4186092|chr17:4200109-4210315
hsa_circ_0056856	5.4278	-4.93919	1.90505	-2.59269	0.00952296	0.996171	1177	chr2	160980301	160983112	0	-	0	15	32	1	0	0	0	0	2	5	160980301	160980301	0,0,0	2	98223	0,2588	circRNA	ITGB6	ENST00000283249	12,11	chr2:160968710-160980301|chr2:160983112-160993944
hsa_circ_0000033	3.45089	-5.49014	2.06731	-2.6557	0.00791451	0.996171	268	chr1	26584087	26586293	0	+	8	4	15	0	0	0	0	0	0	7	26584087	26584087	0,0,0	3	134118186	0,546,2020	circRNA	CEP85	ENST00000451429	4,5,6	chr1:26582356-26584087|chr1:26586293-26594973
