# Supplementary material for: Transcriptomic analysis of human ALS skeletal muscle reveals a disease-specific pattern of dysregulated circRNAs
Source: publisher site journal article supplement (doi:10.18632/aging.204450), 2022-12-30
Supplement: Supplementary file [file aging-v14i24-204450-supplementary-material-SD5.pdf]

## SUPPLEMENTARY TABLE

**Supplemental Table 1. Histological features of muscle samples from disease controls.**

| <b>Neuropathic muscle samples</b>   |                                                                     |
|-------------------------------------|---------------------------------------------------------------------|
| <b>Clinical diagnosis</b>           | <b>Muscle histology</b>                                             |
| Lumbosacral plexopathy              | Scattered grouped atrophy; regeneration fibers                      |
| CIDP                                | Type I and II fiber type grouping                                   |
| Axonal Guillain-Barre syndrome      | Angular fibers consistent with mild denervation process             |
| CIDP                                | Grouped atrophy; angular fibers                                     |
| Sensorimotor axonal neuropathy      | Scattered atrophic fibers; Type I and II fiber type grouping        |
| <b>Myopathic muscle samples</b>     |                                                                     |
| <b>Diagnosis</b>                    | <b>Muscle histology</b>                                             |
| Inflammatory myopathy               | Perivascular inflammatory cells and scattered regeneration fibers   |
| Inflammatory myopathy               | Perivascular inflammatory cells                                     |
| Inflammatory myopathy               | Endomysial and perivascular inflammatory cells, regeneration fibers |
| Inflammatory myopathy               | Perivascular inflammatory cells                                     |
| Inflammatory/mitochondrial myopathy | Perivascular inflammatory cells and ragged red fibers               |
| Inclusion body myopathy             | Regeneration fibers, rimmed vacuoles, “moth-eaten” fibers           |
| Mitochondrial myopathy              | Ragged red fibers, Type II fiber atrophy                            |
| Mitochondrial myopathy              | Ragged red fibers, Type II fiber atrophy                            |

Abbreviation: CIDP: chronic inflammatory demyelinating polyradiculoneuropathy.
